# Supplementary material for: Integrated sensing of host stresses by inhibition of a cytoplasmic two-component system controls M. tuberculosis acute lung infection
Source: eLife. 2021 May 18;10:e65351. doi: 10.7554/eLife.65351 (PMC8131098; doi:10.7554/eLife.65351)
Supplement: Supplementary file 1. [file elife-65351-supp1.xlsx]

## Sheet: Table S1 Strains
Supplementary File 1: Strains
Strain ID	Name	Genotype and Relevant Features	Plasmid	Reference
	E.coli
DH5α	DH5α	Standard Molecular Cloning Strain		Laboratory Stock
Bl21 Rosetta 2 DE3	Bl21 Rosetta 2 DE3	T7lac Expression Strain		Laboratory Stock
	Rosetta WT PdtaS	T7lac Expression Strain	pET WT PdtaS 10xHIS	This Study
	Rosetta WT PdtaS Kinase Domain	T7lac Expression Strain	pET WT PdtaS Kinase Domain 10XHIS	This Study
	Rosetta C53A PdtaS	T7lac Expression Strain	pET C53A PdtaS 10XHIS	This Study
	Rosetta WT PdtaR	T7lac Expression Strain	pET Sumo WT PdtaR	This Study
	Rosetta D65A PdtaR	T7lac Expression Strain	pET Sumo D65A PdtaR	This Study
	M.tuberculosis Erdman Strain
EG2	EG2	Wild Type M.tuberulosis Erdman Strain Animal Passaged		Laboratory Stock
MGM343	EG2 + Vector	Wild Type M.tuberulosis Animal Passaged	pMV306K	Makinoshima et al. (2005)
MGM345	EG2 + Vector	Wild Type M.tuberulosis Animal Passaged	pMV261K	Makinoshima et al. (2005)
MGM3206	Δrip1	rip1::loxP		Sklar et al. (2010)
	Δrip1 + Vector	rip1::loxP	pMV306K	Sklar et al. (2010)
	Δrip1 + Vector	rip1::loxP	pMV261K	Sklar et al. (2010)
	Δrip1 + WT rip1	rip1::loxP	pHMG121	Sklar et al. (2010) Makinoshima et al. (2005)
	Δrip1 + H21A rip1	rip1::loxP	pHMG141	Makinoshima et al. (2005)
	Δrip1 + PPE1 ORF pHSP60	rip1::loxP	pMV261K ORF PPE1 GFP	This Study
	Δrip1 + PPE1 ORF +5' pHSP60	rip1::loxP	pMV261K ORF PPE1 GFP + 5'PPE1	This Study
	Δrip1 + Rv0097-nrp pHSP60	rip1::loxP	pMV261K Rv0097-nrp	This Study
	Δrip1pdtaS F37X	rip1::loxP pdtaS F37X		This Study
	Δrip1pdtaS F37X +Vector	rip1::loxP pdtaS F37X	pMV306K	This Study
	Δrip1pdtaS F37X: WT pdtaS 10xHis	rip1::loxP pdtaS F37X	pMV306K WT PdtaS 10xHis	This Study
	Δrip1pdtaS F37X: V54F pdtaS 10xHis	rip1::loxP pdtaS F37X	pMV306K V54F PdtaS 10xHis	This Study
	Δrip1pdtaS F37X: H302/303Q pdtaS 10xHis	rip1::loxP pdtaS F37X	pMV306K H302/303Q PdtaS 10xHis	This Study
	Δrip1pdtaS F37X: G443/445A pdtaS 10xHis	rip1::loxP pdtaS F37X	pMV306K G443/445A PdtaS 10xHIs	This Study
	Δrip1pdtaS V54F	rip1::loxP pdtaS V54F		This Study
	Δrip1pdtaS V54F +Vector	rip1::loxP pdtaS V54F	pMV306K	This Study
JSS0005	ΔsigD	sigD::HygR		Schneider et al. (2014)
MGM3254	ΔsigL	sigL::loxP		Sklar et al. (2010)
MGM3255	ΔsigLΔsigM	sigL::loxP sigM::hygR		Sklar et al. (2010)
MGM3256	ΔsigKΔsigLΔsigM	sigL::loxP sigM::hygR sigK::zeoR		Schneider et al. (2014)
MGM3259	ΔsigK	sigK::loxP		Sklar et al. (2010)
MGM3260	ΔsigM	sigM::loxP		Sklar et al. (2010)
MGM3261	ΔsigKΔsigL	sigK::loxP sigL::hygR		Sklar et al. (2010)
MGM3283	ΔsigKΔsigM	sigM::loxP sigK::hygR		Sklar et al. (2010)
MGM3288	ΔsigKΔsigD	sigK::loxP sigD::hygR		This Study
MGM3289	ΔsigLΔsigD	sigL::loxP sigD::hygR		This Study
MGM3290	ΔsigMΔsigD	sigM::loxP sigD::hygR		This Study
	ΔctpV	ctpV::hygR		This Study
	ΔcsoR	csoR::hygR		This Study
	ΔmymT	mymT::hygR		This Study
	Δrip1ΔctpV	rip1::loxP ctpV::hygR		This Study
	Δrip1ΔcsoR	rip1::loxP csoR::hygR		This Study
	Δrip1ΔmymT	rip1::loxP mymT::hygR		This Study
	ΔpdtaS	pdtaS::hygR		This Study
	ΔpdtaS + vector	pdtaS::hygR	pMV306K	This Study
	ΔpdtaR	pdtaR::hygR		This Study
	ΔpdtaR + vector	pdtaR::hygR	pMV306K	This Study
	Δnrp	nrp::hygR		This Study
	Δnrp +vector	nrp::hygR	pMV306	This Study
	Δnrp +nrp	nrp::hygR	pMV306 WT nrp	This Study
	Δrip1Δpdtas	rip1::loxP pdtaS::hygR		This Study
	Δrip1ΔpdtaS +vector	rip1::loxP pdtaS::hygR	pMV306K	This Study
	Δrip1ΔpdtaR	rip1::loxP pdtaR::hygR		This Study
	Δrip1ΔpdtaR +vector	rip1::loxP pdtaR::hygR	pMV306K	This Study
	Δrip1ΔpdtaR +WT pdtaR HA	rip1::loxP pdtaR::hygR	pMV306K WT PdtaR HA	This Study
	Δrip1ΔpdtaR + D65A pdtaR HA	rip1::loxP pdtaR::hygR	pMV306K D65A PdtaR HA	This Study
	Δrip1Δnrp	rip1::loxP nrp::hygR		This Study
