# Supplementary material for: Integrated sensing of host stresses by inhibition of a cytoplasmic two-component system controls M. tuberculosis acute lung infection
Source: eLife. 2021 May 18;10:e65351. doi: 10.7554/eLife.65351 (PMC8131098; doi:10.7554/eLife.65351)
Supplement: Supplementary file 2. [file elife-65351-supp2.xlsx]

## Sheet: Table S2 plasmids
Supplementary File 2 Plasmids
Plasmid ID	Name	Vector	Insert	Relavent Features
pET SUMO	pET SUMO	pET SUMO	None	T7lac Promoter E.coli Expression vector. N-terminal 10xHIS Sumo Fusion Protein
pET	pET	pET SUMO	Sumo Tag removed	T7lac Promoter E.coli Expression vector.
	pET WT PdtaS 10XHIS	pET	AA 1-501 WT PdtaS	T7lac Promoter E.coli Expression vector. C-terminal 10xHIS tag preceded by enterokinase recognition sequence added by PCR
	pET C53A PdtaS 10XHIS	pET	AA 1-501 C53A PdtaS	T7lac Promoter E.coli Expression vector. C-terminal 10xHIS tag preceded by enterokinase recognition sequence added by PCR. C53A Mutation introduced via QuickChange PCR
	pET WT PdtaS Kinase Domain 10XHIS	pET	AA 227-501 WT PdtaS	T7lac Promoter E.coli Expression vector. C-terminal 10xHIS tag preceded by enterokinase recognition sequence added by PCR
	pET Sumo WT PdtaR	pET SUMO	AA 1-205 WT PdtaR	T7lac Promoter E.coli Expression vector. N-terminal 10xHIS Sumo Fusion Protein
	pET Sumo D65A PdtaR	pET SUMO	AA 1-205 D65A PdtaR	T7lac Promoter E.coli Expression vector. N-terminal 10xHIS Sumo Fusion Protein D65A mutation introduced via infusion recombination
pMV261K	pMV261K	pMV261K	None	Multicopy mycobacterial expression plasmid pHSP60 driver
pMV306K	pMV306K	pMV306K	None	attP integrating mycobacterial expression vector
pHMG121	WT rip1	pMV261K	AA 1-404 WT Rip1	Makinoshima et al. (2005)
pHMG141	H21A rip1	pMV261K	AA 1-404 H21A Rip1	Makinoshima et al. (2005)
	pMV306K WT PdtaS 10xHis	pMV306K	500bp 5' of Start codon + AA 1-501 WT PdtaS
	pMV306K V54F PdtaS 10xHis	pMV306K	500bp 5' of Start codon + AA 1-501 V54F PdtaS
	pMV306K H302/303Q PdtaS 10xHis	pMV306K	500bp 5' of Start codon + AA 1-501 H302/303Q PdtaS. H302/303Q mutation introduced via infusion recombination
	pMV306K G443/445A PdtaS 10xHIs	pMV306K	500bp 5' of Start codon + AA 1-501 G443/445A PdtaS. G443/445A mutation introduced via infusion recombination
	pMV306K WT PdtaR HA	pMV306K	309pb 5' of Start codon + AA 1-205 WT PdtaR
	pMV306K D65A PdtaR HA	pMV306K	309pb 5' of Start codon + AA 1-205 D65A PdtaR
	pMV261K ORF PPE1 GFP	pMV261K	pHSP60 AA 1-463 PPE1 C-terminal GFP Fusion
	pMV261K ORF PPE1 GFP + 5'PPE1	pMV261K	pHSP60 + 222bp 5' of Start Codon +AA 1-463 PPE1 C-terminal GFP Fusion
	pMV261K Rv0097-nrp	pMV261K	pHSP60 Rv0097 AA 1- nrp AA 2512
	pMV306 WT nrp	pMV306K	1-32 AA FadD10(Predicted Transcriptional Start (Wadsworth) )+ AA 1-2512 nrp
pmsg360Hyg	pmsg360Hyg	pmsg360Hyg	none	double crossover recombination phage packaging vector
	CtpV KO Vector	pmsg360Hyg	616 bp 5' CtpV AA 59 + 600bp3' CtpV AA 712. Targets CtpV AA 59-712 for replacement with Hyg Cassette
	CsoR KO Vector	pmsg360Hyg	600bp 5' CsoR Start Codon + 600bp 3' of CsoR Stop Codon. Targets CsoR coding sequence for replacement with Hyg Cassette
	MymT KO Vector	pmsg360Hyg	600bp 5' MymT Start Codon + 600bp 3' of MymT Stop Codon. Targets MymT coding sequence for replacement with Hyg cassette
	pdtaS KO Vector	pmsg360Hyg	600bp 5' PdtaS Start Codon + 579bp 3' PdtaS Stop Codon. Targets PdtaS Coding Sequence for replacment with Hyg Cassette
	pdtaR KO Vector	pmsg360Hyg	600bp 5' PdtaR Start Codon + 647bp 3' PdtaR AA 192. Targets PdtaR AA 1-192 for replacment with Hyg Cassette
	nrp KO Vector	pmsg360Hyg	621bp 5' nrp AA 8 + 621bp 3' nrp AA 2505. Targets Nrp AA 8-2505 for replacement with Hyg cassette
