# Supplementary material for: Integrated sensing of host stresses by inhibition of a cytoplasmic two-component system controls M. tuberculosis acute lung infection
Source: eLife. 2021 May 18;10:e65351. doi: 10.7554/eLife.65351 (PMC8131098; doi:10.7554/eLife.65351)
Supplement: Supplementary file 3. [file elife-65351-supp3.xlsx]

## Sheet: Table S3 oligonucleotides
Supplementary File 3 Primers
Name	Sequence
RT-qPCR Primers
oSigA-1	5'-cgtcttcatcccagacgaaat-3'
oSigA-2	5'-cgacgaagaccacgaagac-3'
oCtpV-1	5'-gtgtcccatgttcgaggtcaa-3'
oCtpV-2	5'-gtcaatgttcttcggtgcttac-3'
oLpqS-1	5'-gcatcgagttgtccaccag-3'
oLpqS-2	5'-tcaatgtggctcacccaaac-3'
oMymT-1	5'-gggtgatacgaatgacgaacta-3'
oMymT-2	5'-acagtggcatgggacttc-3'
o2625c-F	5'-tcttgatcgcgttgggattg-3'
o2625c-R	5'-cccggcgaattgatgtagag-3'
oDesR-F	5'-tctgatcctcacgtcctacac-3'
oDesR-R	5'-agcgcccacatctttgac-3
oHspX-F	5'-gaattcgcgtacggttccttc-3'
oHspX-R	5'-gccaccgacacagtaagaatg-3'
QuickChangePrimers
oPdtaS_C53A-F	5'-gcgacgacggtgtcctggtggcggttgcg-3'
oPdtaS_C53A-R	5'-cgcaaccgccaccaggacaccgtcgtcgc-3'
InVitroTranscript Primers
Sense5'PPE1-F	5'-taatacgactcactatagggggccgactaacaccgcgg-3'
Sense5'PPE1-R	5'-ggtttgctcaagccaggc-3'
Rv3864-F	5'-taatacgactcactataggcaaaaaattcgtgcaccaacc-3'
Rv3864-R	5'-tttccttacgctcgccgt-3'
AntiDNAK-F	5'-gatccacctagttctagaatggctcgtgcggtcg-3'
AntiDNAK-R	5'-taatacgactcactatagggggcgtcattgaagtaggcg-3'
