# Supplementary material for: Integrated sensing of host stresses by inhibition of a cytoplasmic two-component system controls M. tuberculosis acute lung infection
Source: eLife. 2021 May 18;10:e65351. doi: 10.7554/eLife.65351 (PMC8131098; doi:10.7554/eLife.65351)
Supplement: Supplementary file 4. — Each cell contains the normalized counts for each gene in each replicate. Please see Materials and methods for details. [file elife-65351-supp4.xlsx]

## Sheet: Legend
Column Name	Definition.
Rv#	H37Rv gene number
gene	Gene name
DoubleMut_NO_1	Drip1DpdtaR, DETA-NO treated, replicate #1
DoubleMut_NO_2	Drip1DpdtaR, DETA-NO treated, replicate #2
DoubleMut_NO_3	Drip1DpdtaR, DETA-NO treated, replicate #3
DoubleMut_V_1	Drip1DpdtaR, Vehicle treated, replicate #1
DoubleMut_V_2	Drip1DpdtaR, Vehicle treated, replicate #2
DoubleMut_V_3	Drip1DpdtaR, Vehicle treated, replicate #3
RIP1_NO_1	Drip1, DETA-NO treated, replicate #1
RIP1_NO_2	Drip1, DETA-NO treated, replicate #2
RIP1_NO_3	Drip1, DETA-NO treated, replicate #3
RIP1_V_1	Drip1, vechicle treated, replicate #1
RIP1_V_2	Drip1, vechicle treated, replicate #2
RIP1_V_3	Drip1, vechicle treated, replicate #3
RV1626_NO_1	DpdtaR, DETA-NO treated, replicate #1
RV1626_NO_2	DpdtaR, DETA-NO treated, replicate #2
RV1626_NO_3	DpdtaR, DETA-NO treated, replicate #3
RV1626_V_1	DpdtaR, vehicle treated, replicate #1
RV1626_V_2	DpdtaR, vehicle treated, replicate #2
RV1626_V_3	DpdtaR, vehicle treated, replicate #3
WT_NO_1	WT Mtb, DETA-NO treated, replicate #1
WT_NO_2	WT Mtb, DETA-NO treated, replicate #2
WT_NO_3	WT Mtb, DETA-NO treated, replicate #3
WT_V_1	WT Mtb, vehicle treated, replicate #1
WT_V_2	WT Mtb, vehicle treated, replicate #2
WT_V_3	WT Mtb, vehicle treated, replicate #3
	Each cell contains the normalized counts for each gene in each replicate. Pleasee methods for details.

## Sheet: RIP1_V_vs_WT_V.contrast_DESeq2n
Rv#	gene	DoubleMut_NO_1	DoubleMut_NO_2	DoubleMut_NO_3	DoubleMut_V_1	DoubleMut_V_2	DoubleMut_V_3	RIP1_NO_1	RIP1_NO_2	RIP1_NO_3	RIP1_V_1	RIP1_V_2	RIP1_V_3	RV1626_NO_1	RV1626_NO_2	RV1626_NO_3	RV1626_V_1	RV1626_V_2	RV1626_V_3	WT_NO_1	WT_NO_2	WT_NO_3	WT_V_1	WT_V_2	WT_V_3
Rv2869c	rip	0	0	0	0	0	1.31856	0	1.36187	0	0	0	0	2321.16	2355.88	2315.22	1647.19	1639.11	1789.94	2653.21	2638.65	2314.53	1566.37	1478.87	1574.31
Rv1815	Rv1815	847.223	898.135	837.213	525.4	542.245	518.853	815.239	898.831	824.47	285.247	316.806	293.955	3381.44	3174.86	3004.9	7069.82	7308.69	7372.28	3013.79	2901.83	2393.45	8438.63	8295.32	8643.37
Rv1884c	rpfC	2074.33	2189.83	2185.91	2411.4	2397.76	2519.76	1727.16	1831.71	1713.99	1401.24	1544.34	1404.89	11100.7	10840.8	10247.3	14956.9	14711.6	15317.1	7708.07	8232.87	7448.67	17649.1	17240	17911
Rv3229c	desA3	10177.6	10261.8	10559.3	6651.28	6539.04	6905.95	3839.86	4029.76	3826.28	2685.58	2621.77	2664.81	34770.8	31851	31635.7	21297.8	21615.1	22999.7	27605.5	27308.3	23878.5	21542.9	20730.2	21821.5
Rv1816	Rv1816	359.387	343.108	361.048	239.623	302.537	295.357	483.414	435.797	459.367	241.871	221.548	240.29	585.663	446.714	433.366	1413.33	1473.35	1519.1	524.94	567.689	543.835	1790.98	1824.05	1786.54
Rv1754c	Rv1754c	1453.94	1422.89	1377.48	163.753	155.025	178.005	1153.03	1228.4	1182.94	179.382	196.29	173.009	1866.24	1837.38	1770.56	834.397	884.013	823.909	3075.85	2766.8	2677.56	1340.93	1235.75	1323.12
Rv1076	lipU	8893.11	9030.68	8594.51	561.439	580.489	566.98	11600.7	12003.5	11127	471.245	442.373	418.104	9567.61	9420.88	9183.32	2709.73	2683.21	2599.1	11479.9	11705.1	10033	2724.6	2674.97	2879.19
Rv1469	ctpD	5321.11	5047.94	4913.39	213.068	207.61	209.651	1994.53	2004.67	2121.58	207.318	196.29	175.412	7719.28	8187.09	8382.35	957.682	974.681	854.747	4823.41	4673.79	5307.77	1185.88	1154.49	1099.28
Rv0312	Rv0312	9509.4	9700.08	9211.95	636.044	697.953	725.207	10008.5	9667.88	9709.1	624.161	601.137	627.958	13674.4	12812.4	12952.1	3046.53	3078.46	2976.53	12699.2	12126.8	11047.4	3565.19	3519.38	3609.56
Rv0040c	mtc28	9460.2	9074.41	9154.4	645.528	615.319	638.841	10294.9	9986.56	10973	627.101	609.797	679.219	9608.81	10628.1	10839.2	2912.45	2770.33	2599.1	14066	13471.6	15989.3	3275.22	3552.54	3363.34
Rv3230c	Rv3230c	13082.8	12810.5	12853.8	2702.24	2707.81	2786.11	4448.6	4944.93	4673.32	1236.56	1088.25	1209.46	22796.1	24397.8	23831.8	5413.73	5416.7	5340.33	22339.3	23041	25713.8	5636.93	5742.56	5911.75
Rv2721c	Rv2721c	16896.6	16658.7	16478.7	3221.32	3391.42	3293.76	7542.45	8184.81	7703.02	2783.36	2881.56	2480.59	33124.9	36488.3	38057	10307.6	10385.7	9445.8	38843.9	38955.6	36082.5	11723.9	12326.3	11887.3
Rv0888	Rv0888	3246.78	3121.61	2938.09	189.675	202.147	204.377	857.015	905.64	865.627	206.583	205.671	220.266	6187.96	5936.24	6057.01	584.014	611.301	546.368	4043.55	3798.83	3551.43	884.175	945.177	853.063
Rv1987	Rv1987	2891.49	2862.59	2808.59	1139.32	1232	1215.71	2377.68	2595.71	2379.15	935.873	932.376	964.363	5684.69	5085.36	5304.94	4185.97	4157.98	4614.29	3837.26	3830.53	3044.9	3990.1	3743	4105.31
Rv1478	Rv1478	3647.16	3586.93	3469.2	968.608	919.222	888.049	4952.31	5352.13	5112.78	852.064	840.726	801.767	3576.66	4179.97	4468.56	3156.47	3123.09	2773.4	7278.72	7397.87	8144.61	3276.89	3251.56	3424.69
Rv2253	Rv2253	10.9319	17.9403	13.0814	16.4385	24.5854	16.482	26.2595	17.7042	18.5871	22.7903	25.9795	32.0387	53.7305	50.5212	48.9013	65.4554	68.001	62.3463	21.8026	30.3135	20.0889	112.303	113.759	96.1664
Rv1883c	Rv1883c	2446.02	2475.76	2426.61	2339.33	2352.01	2478.89	1955.14	1996.49	1952.97	1905.56	1855.37	2007.22	5014.85	4659.92	4532.64	5953.9	6213.59	6193.06	4358.85	4398.21	3824.06	7343.26	7451.55	7204.19
Rv3500c	yrbE4B	460.507	417.111	435.612	199.791	220.586	213.606	291.242	281.906	293.41	172.765	160.929	177.014	863.27	838.918	878.536	494.41	577.3	494.077	848.625	884.603	766.247	619.341	646.802	575.341
Rv2075c	Rv2075c	1108.22	1095.48	1088.38	219.391	237.659	237.34	633.809	603.306	712.947	297.745	246.084	251.503	1889.52	2068.71	2197.18	713.654	714.719	652.289	1672.09	1522.56	2235.61	921.05	990.03	929.333
Rv1566c	Rv1566c	3897.23	3923.31	3981.99	687.889	725.953	683.672	7649.87	7354.07	7953.94	832.214	790.21	770.53	1875.19	2141.83	2109.5	2448.54	2331.16	2156.64	5381.89	4981.06	8174.74	2702.81	2877.78	2658.67
Rv1037c	esxI	5.46596	5.60633	5.23258	10.116	9.561	5.93351	1.19361	6.80933	6.63824	5.88137	4.32992	1.60193	25.0742	13.2951	6.745	8.89685	6.37509	8.71507	5.03137	2.75577	10.0444	9.21888	20.8017	12.4353
Rv3810	pirG	9275.73	9106.93	9308.76	2102.87	2227.71	2190.12	14985.8	13580.5	14934.7	2234.92	1936.2	2014.43	5967.67	6248.68	6416.18	6172.5	5821.17	5539.43	9863.17	9748.55	12234.1	6402.09	6358.81	6408.33
Rv3310	sapM	106.586	121.097	90.262	424.24	418.635	468.747	38.1957	43.5797	46.4677	265.397	301.651	292.353	222.086	219.368	210.781	1107.66	1083.77	1230.84	98.9504	119.876	86.0952	875.794	862.62	923.529
Rv1477	ripA	9405.54	9502.74	9790.15	2786.96	2830.06	2908.74	19270.9	18949	19102.2	2964.95	3041.77	3017.24	7909.13	7842.75	7945.61	8176.84	7947.62	7854.29	16749.4	16560.8	18455.9	9105.74	9210.6	9357.16
Rv2244	acpM	38193.4	37401	34971.9	5477.19	5776.89	5536.63	21252.3	20629.5	20464.4	6060.75	6943.03	6621.59	63683.2	58145.9	62733.6	10260.6	10702.4	11322.9	77840.4	71453.1	56188.6	19824.8	20062.6	20277
Rv1197	esxK	532.931	526.995	443.461	1988.43	1898.54	1682.48	404.635	415.369	391.656	1594.59	1829.39	1540.26	1697.88	1656.56	1775.62	3695.37	4049.6	3709.94	2034.35	2102.66	1719.03	4979.87	4928.7	5282.52
Rv1886c	fbpB	255.533	214.162	192.297	2706.67	2898.35	2676.67	74.0041	91.245	102.229	1631.35	1558.77	1541.86	257.906	255.265	219.213	4105.89	4534.11	4009.6	253.246	225.973	223.847	4637.1	4731.08	4595.26
Rv1690	lprJ	4687.06	4698.11	4477.78	261.752	250.635	236.022	2245.19	2256.61	2173.36	245.547	228.764	228.275	7645.85	8167.15	8345.25	460.094	465.382	440.446	7882.49	7607.31	7906.41	696.445	694.906	631.714
Rv2246	kasB	58228.8	58209.4	57986.1	8652.98	8742.85	8709.08	45123.4	42748.9	42033.4	9526.35	9260.25	9108.59	113613	113080	116355	18623	17367.2	17804.2	124218	130276	134475	26038.3	27146.8	26803.9
Rv3260c	whiB2	5676.39	5617.55	5428.8	1480.73	1603.52	1565.13	4151.39	4387.93	3955.07	1224.8	1309.8	1315.99	10762.2	9958	10142.8	3110.72	3259.09	3065.02	9427.12	8593.88	7411.36	3717.72	3666.95	3568.94
Rv2144c	Rv2144c	2817.7	2817.74	2788.96	1419.4	1509.96	1431.29	3512.81	3332.48	3356.3	1224.06	1366.81	1240.7	5136.64	5170.45	5164.99	3123.43	3145.75	3240.67	5972.24	5905.62	4690.75	3612.96	3557.09	3549.04
Rv1198	esxL	1820.16	1703.2	1522.68	4439.66	4605.67	4340.69	1230.62	1345.52	1205.51	4135.34	4132.19	3962.38	4511.57	4379.39	4461.82	8458.99	9131.97	8592.39	5640.17	5930.42	4967.69	10978.9	10502.9	11822.7
Rv2348c	Rv2348c	5970.19	5911.32	5842.17	2018.78	2003.03	1938.28	2929.13	3158.17	2947.38	1338.01	1603.51	1371.25	10498.9	11270.2	11431.1	3043.99	3101.13	2952.4	9992.31	9924.92	9169.14	3908.81	3866.51	3967.69
Rv1196	PPE18	985.239	1064.08	982.417	4763.38	4611.82	4195.65	868.951	916.535	829.781	4857.28	4723.22	4354.05	3546.21	3638.86	3512.46	8769.11	8936.46	7990.38	3993.23	3732.7	5135.58	12298	12520.7	12888.8
Rv2245	kasA	115997	114609	114082	15493.9	16061.1	15473.9	73329.7	71796.2	71715.6	18970.4	19929.9	18307.7	187851	196601	203984	30699.8	29865.2	29279.3	231016	223908	263969	50150.7	52332.5	50234.5
Rv2347c	esxP	6048.08	5738.64	5826.48	2049.76	2020.1	1949.49	2236.83	2384.63	2310.11	1328.46	1588.36	1380.06	10438	11226.3	11459.8	2878.13	2986.38	2898.1	9091.69	8706.87	7392.71	3804.05	3791.11	3815.16
Rv3313c	add	1289.97	1305.15	1429.8	375.557	381.757	356.67	1141.1	1138.52	1127.17	308.772	308.868	313.979	2247.73	2233.57	2175.26	809.613	804.678	736.759	1947.14	1980.02	1848.18	790.31	835.318	796.689
Rv2410c	Rv2410c	2279.3	2181.99	2213.38	512.755	471.904	488.526	2060.18	1935.21	1759.13	384.495	451.033	398.881	3608.9	3403.53	3654.1	948.785	990.265	945.25	3855.71	4159.84	3770.97	1055.98	1074.54	1050.37
Rv3675	Rv3675	4702.09	4676.8	4692.31	241.52	274.537	253.163	3977.12	4198.63	4078.54	265.397	269.177	293.154	6601.69	5877.74	6057.01	465.813	449.798	433.742	6217.1	5902.87	5083.92	711.53	702.707	671.507
Rv0719	rplF	1418.42	1561.92	1403.64	3224.48	3067.03	3168.5	942.955	932.878	910.767	2070.98	2176.51	2027.25	4309.19	4235.8	4089.16	5151.91	5216.24	5233.06	3636.01	3687.23	2776.57	5272.36	5088.61	5336.41
Rv1028A	kdpF	5.46596	4.48507	7.84887	15.174	16.3903	11.867	5.96807	5.44746	5.3106	6.61654	8.65984	4.00483	10.7461	7.97703	13.49	24.1486	23.3753	22.1229	21.8026	17.9125	7.1746	20.952	11.0509	19.0675
Rv2409c	Rv2409c	1654.82	1718.9	1658.73	357.854	385.855	346.121	1407.27	1348.25	1407.31	325.681	310.311	332.401	2908.61	2822.54	2768.82	747.971	745.886	695.865	2931.61	3038.24	2957.37	776.9	763.162	817.415
Rv0320	Rv0320	19.1308	20.1828	14.3896	134.669	122.244	152.293	13.1298	14.9805	10.6212	120.568	124.124	119.344	19.7012	11.9655	13.49	151.882	182.044	161.564	21.8026	5.51155	8.60952	294.166	285.373	298.448
Rv3512	PE_PGRS56	10.9319	5.60633	5.23258	3.7935	2.73172	4.61495	7.16169	1.36187	5.3106	4.41103	5.05157	4.00483	14.3281	14.6246	18.5488	6.99038	10.6252	8.71507	21.8026	19.2904	30.1333	8.3808	10.4008	14.9224
Rv2846c	efpA	82568.7	81280.6	81073.6	16442.3	15932.7	17134	75826.7	82522.2	81104.7	16028.9	15065.2	15527.5	117269	115767	114056	29055.2	28073.1	30197	118539	118921	106462	36126.3	36126.7	36282.9
Rv0975c	fadE13	91.5548	100.914	107.268	117.599	119.513	139.767	106.232	129.377	128.782	87.4854	95.9799	70.485	59.1036	66.4753	52.2738	263.092	269.171	253.407	70.4392	81.2953	97.5746	202.815	178.114	206.426
Rv3890c	esxC	1590.59	1487.92	1462.51	549.426	604.392	503.03	520.416	578.793	505.834	459.482	425.054	476.575	2702.64	2487.5	2638.98	720.645	763.595	741.451	2066.22	2010.34	1670.25	1090.34	996.531	1022.18
Rv3717	Rv3717	363.486	349.835	304.798	779.565	691.807	772.675	297.21	344.552	278.806	681.504	702.89	640.773	626.856	659.435	637.403	1683.41	1658.94	1653.18	528.294	562.178	505.092	1569.72	1538.02	1497.21
Rv0166	fadD5	2761.67	2834.56	2764.11	6709.44	6779.43	6698.93	1270.01	1334.63	1343.58	5374.84	5339.51	5243.13	6354.53	5631.78	5584.86	8963.57	9053.34	9620.1	6601.16	6312.1	5233.15	12033.2	11812.8	12242.2
Rv2108	PPE36	520.632	468.69	477.473	130.244	117.464	98.8919	235.142	187.937	179.233	83.8096	113.3	75.2908	800.585	745.853	858.301	163.321	215.336	185.698	645.693	593.869	487.873	198.625	201.516	217.204
Rv0204c	Rv0204c	1339.16	1301.79	1318.61	816.236	900.1	830.692	1567.22	1425.87	1497.59	730.025	673.302	704.049	1731.91	1889.23	1804.29	1648.46	1655.4	1501.67	2287.6	2210.13	2465.19	1552.96	1549.08	1630.68
Rv3891c	esxD	1380.15	1411.67	1288.52	482.407	419.318	455.562	414.184	415.369	387.673	358.029	376.703	402.085	2340.86	2137.84	2354.01	587.192	642.468	596.647	1702.28	1530.83	1407.66	912.669	808.665	822.389
Rv0974c	accD2	157.146	141.28	121.657	195.365	202.147	203.717	217.238	185.214	224.373	138.947	157.32	147.378	111.043	105.031	145.018	484.878	446.965	477.988	129.139	128.143	142.057	310.928	344.528	332.437
Rv3881c	espB	6254.42	6177.06	6166.59	3913	3933.67	3779.65	4772.07	4729.76	4780.86	3401.64	3492.8	3256.73	9143.14	9236.07	9567.78	5691.44	5671	5351.72	8229.65	8033.08	8084.34	7481.54	7481.46	7563.99
Rv0207c	Rv0207c	14801.8	14496.9	14700.9	1782.31	1785.86	1716.76	9040.43	10047.8	9106.34	1729.86	1695.88	1719.67	23920.8	24347.2	24324.2	2880.67	2988.5	2955.08	22062.6	20971.4	19540.7	3752.09	3832.71	3815.16
Rv3414c	sigD	4540.84	4522.07	4462.08	1342.27	1420.49	1395.03	6254.54	6369.44	6493.53	1329.93	1446.19	1336.01	3965.31	4154.7	4111.08	2465.06	2491.24	2469.05	6817.51	6813.65	6511.67	3102.57	2991.54	3000.23
Rv0885	Rv0885	4006.55	3848.19	3683.74	943.318	889.173	901.234	1187.65	1355.06	1216.13	699.148	678.354	720.069	10386.1	9805.1	9606.57	1243.65	1259.44	1331.39	9977.22	9563.91	7882.01	1546.26	1495.12	1582.6
Rv3413c	Rv3413c	3726.42	3797.73	3674.58	1041.32	1145.27	1093.08	4849.65	4653.49	5103.48	1159.37	1123.61	1154.99	3386.81	3653.48	3802.49	2086.31	1971.32	1970.28	5408.73	5375.14	6801.52	2520.11	2518.95	2502.81
Rv2724c	fadE20	487.837	501.206	443.461	715.708	721.173	754.215	458.348	404.474	392.984	498.446	575.158	533.444	800.585	644.81	654.265	1199.8	1318.23	1391.06	580.285	680.676	499.352	1166.61	1158.39	1199.59
Rv0936	pstA2	243.235	254.528	222.385	850.377	818.149	824.099	175.461	207.003	187.199	631.512	583.817	597.521	621.483	454.691	456.974	1147.69	1150.35	1104.13	375.676	429.901	371.644	1358.53	1278.65	1304.05
Rv2908c	Rv2908c	240.502	281.438	255.088	321.816	370.83	325.025	152.783	155.253	176.577	242.607	271.342	259.513	508.649	433.419	472.15	479.794	500.091	519.552	521.586	493.283	347.251	549.781	583.097	543.009
Rv3477	PE31	3632.13	3483.78	3291.29	1789.27	1891.03	1784.01	742.428	856.613	791.279	1133.63	1210.93	1150.19	8636.28	8325.36	8724.66	2662.7	2836.21	2593.74	4449.41	4052.37	3588.73	2463.12	2594.36	2502.81
Rv0129c	fbpC	5032.78	5043.46	5023.28	5740.84	5824.7	5874.18	2756.06	2541.24	2396.41	4972.7	5078.99	4997.23	10518.6	10197.3	10709.4	11198.6	10744.9	10525.8	5396.99	5284.2	4687.88	10844.8	10684.9	10882.6
Rv1433	Rv1433	265.099	280.317	230.233	350.899	364.684	348.759	148.008	157.976	112.85	199.967	210.001	209.052	379.696	408.158	391.21	699.038	740.219	657.653	283.434	305.891	243.936	468.487	417.334	450.158
Rv1772	Rv1772	11123.2	11393.2	10845.8	535.516	500.587	534.675	11847.8	11861.8	10981	606.517	568.663	583.103	15721.5	14579.4	14314.6	892.227	894.638	894.971	13980.5	13679.7	11149.3	1271.37	1248.1	1260.11
Rv3478	PPE60	17681	17397.6	17182.5	9235.92	9474.95	8972.13	4608.54	4652.13	4636.15	5897.55	5994.77	5751.74	41673.4	44397.5	45967.2	14920	15151.5	13909.9	20289.9	19763	22859.7	12556.1	12941.2	12339.1
Rv1195	PE13	453.674	403.656	418.606	1873.99	1864.4	1795.22	337.793	381.322	374.397	2193.75	2373.52	2266.73	1439.98	1277.65	1305.16	2941.68	3079.17	2823.01	1502.7	1258.01	1228.29	4730.12	4858.49	5030.5
Rv1753c	PPE24	306.094	311.712	334.885	213.701	208.976	191.85	259.014	217.898	250.926	192.615	187.63	208.251	587.454	566.369	600.305	362.864	367.63	351.284	503.137	496.039	500.787	416.526	412.783	424.459
Rv1199c	Rv1199c	1.36649	5.60633	3.92443	6.32251	8.19515	6.59279	2.38723	0	2.6553	2.94069	5.05157	4.8058	3.58203	2.65901	1.68625	12.0743	2.83337	6.7039	6.7085	12.401	1.43492	7.54272	9.75079	11.6063
Rv0173	lprK	2778.07	2770.65	2715.71	4918.28	5079.62	5216.88	1049.19	966.924	1056.81	3929.49	3624.86	4058.5	7413.02	7003.83	7104.17	6790.2	6821.35	6819.88	6277.48	6200.49	4986.35	8229.11	7978.75	8310.11
Rv0063	Rv0063	429.078	451.871	455.234	557.645	594.148	554.454	461.929	407.198	520.438	505.063	529.693	537.448	474.62	529.143	509.248	1320.55	1240.31	1213.41	597.056	504.307	717.46	1118	1108.99	1085.19
Rv0716	rplE	1512.7	1592.2	1556.69	3165.05	3111.42	3201.46	925.051	894.745	803.228	2353.28	2194.55	2350.03	3902.63	3519.2	3504.03	4676.56	4850.74	4777.87	3310.64	3082.33	2687.6	4834.88	4740.18	4948.43
Rv3618	Rv3618	390.816	414.869	423.839	295.893	288.879	287.446	329.438	351.361	338.55	246.282	233.094	234.683	732.526	720.592	627.285	513.475	451.923	505.474	669.173	622.805	608.406	532.181	473.888	497.413
Rv3875	esxA	26703.9	26291.5	23969.1	45251.4	44199.8	43163	21993.5	22794.9	20541.4	32406.4	31509.5	30583.3	33662.2	30236.9	30984.9	56701.5	61583.4	61458.7	27342.2	26006.2	20583.9	65984.6	64389	68114
Rv3705A	Rv3705A	437.276	348.714	354.507	124.553	149.561	143.064	194.559	171.595	160.646	102.924	86.5984	107.329	739.69	874.815	913.948	184.927	203.295	156.201	585.317	500.173	579.708	211.196	208.017	200.623
Rv0167	yrbE1A	2943.42	3058.82	2989.11	6583.63	6766.46	6834.75	1414.43	1478.99	1388.72	5726.25	5221.88	5337.64	7201.68	7595.46	7328.44	9209.51	9050.51	9285.57	7763.41	8644.86	8166.13	11052.6	11427.3	11374.2
Rv3922c	Rv3922c	281.497	236.587	242.007	734.675	734.831	733.118	214.851	234.241	204.458	443.308	510.209	397.279	544.469	503.883	509.248	918.282	981.764	1041.12	595.379	633.828	440.52	955.411	910.074	945.913
Rv0718	rpsH	1575.56	1686.39	1657.42	3212.47	3363.42	3167.18	952.504	1028.21	1011.67	2538.55	2648.47	2545.47	4516.94	4097.54	4107.71	4653.05	4944.24	4843.57	4090.51	4024.81	3374.93	5327.68	5116.56	5590.92
Rv1158c	Rv1158c	180.377	151.371	172.675	503.272	603.026	477.977	125.329	123.93	159.318	483.008	504.436	494.196	193.43	263.242	225.958	1090.5	947.056	858.77	253.246	223.218	385.993	1022.46	1053.09	990.68
Rv3743c	ctpJ	4916.63	4806.87	4685.77	306.642	344.196	293.379	685.135	597.859	686.395	66.9006	72.1653	68.0821	4438.14	4881.94	5023.34	731.448	732.427	677.094	734.581	639.339	731.809	153.369	136.511	140.934
Rv1624c	Rv1624c	1280.4	1375.79	1378.78	632.883	663.807	636.204	623.067	596.497	678.429	360.234	349.28	391.672	2362.35	2273.45	2303.42	799.445	825.929	814.524	1682.16	1623.15	1325.87	761.815	728.059	774.306
Rv1768	PE_PGRS31	300.628	267.983	266.862	880.093	912.393	778.609	174.268	193.385	221.717	655.773	683.406	599.123	621.483	858.86	795.91	1571.56	1519.4	1248.27	620.536	654.496	955.657	1272.21	1382.66	1337.21
Rv0208c	Rv0208c	3734.61	3808.94	3758.3	551.323	512.197	510.282	3492.52	3363.81	3556.77	652.832	651.653	670.409	6770.04	6740.59	6375.71	1002.8	952.014	1023.02	5846.46	6193.6	6108.45	1365.23	1352.76	1328.09
Rv3865	espF	4271.64	4322.48	4129.81	2491.7	2545.28	2403.07	3132.04	3190.85	3031.02	2098.18	2253.72	2078.51	6420.8	5720.86	6045.21	3477.4	3618.22	3747.48	5323.19	5080.27	4367.9	4514.74	4211.69	4433.6
Rv2411c	Rv2411c	4174.62	4092.62	4067.02	1048.9	1077.66	1057.48	3832.7	3738.32	3827.61	1066	1004.54	998.004	5595.14	5546.7	5760.23	1835.93	1831.78	1767.15	6951.68	6620.75	6254.82	2063.35	2060.02	2124.78
Rv0170	mce1B	1861.16	1686.39	1692.74	3115.73	3277.38	3210.03	673.198	716.341	699.671	2582.66	2452.18	2286.76	4246.5	4158.69	4235.86	4140.21	4367.65	4342.79	4330.34	4600.76	3263.01	4940.48	5042.46	4892.88
Rv0168	yrbE1B	1168.35	1075.29	1090.99	2256.5	2214.74	2248.8	479.833	469.843	500.524	1920.27	1801.97	1733.29	2460.86	2519.41	2706.43	3180.62	3023.92	2995.3	2497.24	2616.61	2435.06	3620.51	3752.75	3683.34
Rv0988	Rv0988	997.537	1077.54	960.178	424.24	404.977	408.753	525.19	659.143	508.49	280.836	308.868	313.178	1991.61	1905.18	2080.83	576.389	613.426	626.144	1301.45	1406.82	925.523	604.256	590.898	635.859
Rv3085	Rv3085	1038.53	1106.69	1148.55	388.834	374.245	348.099	569.354	505.252	577.527	326.416	306.703	286.746	1506.25	1804.14	1905.46	721.916	696.302	621.452	1051.56	1080.26	1429.18	606.77	610.399	648.294
Rv2293c	Rv2293c	875.919	826.374	876.457	138.463	146.147	137.789	960.859	996.885	1048.84	128.655	125.568	128.956	940.284	916.029	951.045	243.392	240.129	257.43	878.813	850.156	873.866	272.376	263.921	238.758
Rv3083	Rv3083	5435.89	5780.13	5766.3	1982.11	2072.69	2076.07	3323.02	2972.95	3057.58	1540.18	1571.04	1530.65	9060.75	9085.84	9254.14	3399.87	3315.76	3130.72	5108.52	4708.24	4600.35	3159.56	3140.4	3054.11
Rv0002	dnaN	1615.19	1529.41	1568.47	1411.18	1408.2	1448.44	950.117	1085.41	947.941	982.189	910.726	947.543	2994.58	2850.46	2998.15	1879.78	1918.19	1932.06	2869.56	3021.71	2366.18	1845.45	1941.06	1927.47
Rv2346c	esxO	12989.8	13061.6	12518.9	5044.73	4944.4	4967.01	5484.66	6072.56	5564.18	4017.71	4310.43	4204.27	23569.8	22172.2	23339.4	6248.76	6668.35	6439.1	19786.7	19228.4	15149.9	8382.48	8243.32	8552.18
Rv0717	rpsN1	669.58	612.212	599.13	1026.78	1087.91	1095.06	263.789	321.4	338.55	792.515	1064.44	833.005	1257.29	1481.07	1404.65	1595.08	1663.9	1616.98	1542.95	1342.06	1070.45	1813.61	1759.04	1831.31
Rv1792	esxM	2351.73	2415.21	2179.37	1476.94	1591.22	1521.62	1182.87	1153.5	1066.1	1198.33	1199.39	1187.83	3976.06	3879.5	4011.59	2047.55	2129.28	2041.34	3230.14	3109.89	2367.62	2447.19	2381.14	2348.62
Rv0715	rplX	684.611	640.243	609.595	1335.95	1278.44	1197.25	490.575	471.205	436.797	942.49	986.5	964.363	1468.63	1301.59	1254.57	1848.64	1888.44	1906.59	1319.9	1386.15	1084.8	2020.61	1850.7	1915.87
Rv0169	mce1A	2672.85	2619.28	2499.86	5152.21	5137.67	5282.14	977.57	1071.79	1082.03	4475.72	4227.44	4213.88	6721.69	5980.12	6190.23	6720.3	6964.44	7187.92	6693.41	6724.09	5649.28	8519.92	8268.02	8800.06
Rv3880c	espL	2047	2060.89	1926.9	1327.73	1390.44	1381.85	1435.92	1474.9	1512.19	1254.94	1273.72	1235.09	2926.52	3010	2939.13	1865.16	1934.49	1873.07	2705.2	2600.07	2360.44	2455.58	2491.65	2501.16
Rv1525	wbbL2	161.246	153.614	189.681	341.415	333.952	340.847	236.336	201.556	169.939	262.456	293.713	255.508	291.936	224.686	284.976	632.947	617.676	614.748	286.788	282.467	216.673	543.914	506.391	555.444
Rv2948c	fadD22	490.57	484.387	503.636	2665.57	2637.47	2668.76	560.999	562.45	616.029	3074.49	2958.78	2843.43	1362.96	1183.26	1190.49	3805.31	4072.27	3961.33	1341.7	1393.04	964.266	5775.21	5637.26	6065.95
Rv3889c	espG2	593.056	599.878	567.735	248.475	241.757	216.903	261.402	242.412	298.721	233.049	215.774	203.445	874.016	943.949	1058.97	319.651	304.588	288.938	717.809	750.948	830.819	431.611	448.536	402.904
Rv3803c	fbpD	5334.77	5306.96	5079.53	2333.64	2350.64	2378.68	3303.92	3516.34	3551.46	2039.37	2135.37	1968.78	6850.64	7143.43	7262.68	3017.94	3216.59	2835.75	9551.23	9247	8457.42	3992.61	4084.28	3987.59
Rv0460	Rv0460	161.246	173.796	119.041	398.95	417.952	414.687	120.555	138.91	108.867	278.63	225.877	284.343	198.803	241.97	215.84	523.643	585.092	546.368	150.941	114.365	160.711	514.581	505.741	527.257
Rv1918c	PPE35	1284.5	1191.91	1263.67	1148.8	1221.76	1202.52	607.55	641.438	639.927	813.835	899.901	947.543	3136.07	2995.38	3153.29	1477.51	1455.65	1515.75	2621.35	2438.86	2640.25	1711.36	1733.69	1761.67
Rv0935	pstC1	629.951	652.577	627.909	1925.84	1929.96	1907.95	531.158	528.404	540.353	1574	1653.31	1510.62	1371.92	1376.04	1399.59	2587.71	2634.33	2508.6	1291.39	1249.74	1051.8	3085.81	2993.49	3178.47
Rv2459	Rv2459	4191.02	4120.66	3876.03	1505.39	1496.98	1511.73	2919.58	3218.09	2995.18	1182.89	1134.44	1122.95	5437.53	5123.91	5068.87	1916.63	2037.9	2017.87	5207.47	5129.87	4339.2	2296.34	2242.03	2176.18
Rv0722	rpmD	501.501	494.479	453.926	1082.41	1100.88	1076.6	324.663	292.801	306.687	705.03	763.509	792.156	1191.03	1054.3	1112.93	1520.73	1539.23	1540.56	1093.49	1065.11	797.815	1511.9	1416.46	1463.22
Rv0172	mce1D	4055.74	3830.25	3853.79	7728.63	8100.22	8093.31	1431.14	1473.54	1411.29	6045.32	6234.36	6309.21	9689.4	9463.42	10011.3	9990.52	10129.3	10403.8	8670.74	8531.88	6523.15	12289.6	11647	12139.4
Rv0700	rpsJ	2201.41	2173.02	2090.42	5951.38	6231.73	6017.24	1668.67	1596.11	1675.49	4511.01	4712.4	4297.18	5360.51	4975.01	4839.54	9038.56	9126.3	9282.22	5170.58	5032.04	4363.59	8793.14	8522.19	8829.9
Rv2338c	moeW	1716.31	1660.6	1508.29	521.607	542.245	556.432	1211.52	1462.64	1236.04	448.455	469.075	454.148	1930.72	1953.04	1903.78	665.993	751.553	783.016	2188.65	2109.54	1535.36	904.289	837.918	911.094
Rv1435c	Rv1435c	3664.92	3832.49	3763.53	3407.83	3703.52	3820.52	4413.99	3845.91	4709.17	3495.74	3262.59	3452.16	4384.41	4614.71	4524.21	7403.45	6695.27	7173.17	4452.77	4549.78	5726.77	6527.81	6448.52	6733.31
Rv0972c	fadE12	251.434	253.406	316.571	292.1	306.635	302.609	307.952	373.151	351.827	213.935	252.579	233.882	197.012	198.096	177.056	585.285	555.341	549.049	234.797	213.572	216.673	419.04	466.738	465.081
Rv2197c	Rv2197c	1814.7	1776.09	1789.54	1291.69	1215.61	1224.94	1425.18	1443.58	1435.19	927.051	956.19	928.32	2942.64	3307.81	3352.27	2174.64	2180.28	1908.6	2981.93	3116.78	3208.48	1791.82	1848.75	1769.13
Rv2660c	Rv2660c	4.09947	1.12127	0	1.2645	2.04879	0.659279	4.77446	2.72373	5.3106	0.735172	0.721653	1.60193	3.58203	1.32951	0	3.17745	0.708344	2.68156	0	0	1.43492	4.1904	0.650053	2.48706
Rv1762c	Rv1762c	220.005	273.589	215.844	273.765	314.83	279.534	181.429	167.509	167.284	218.346	248.97	227.474	417.307	457.35	389.524	378.116	422.173	416.312	348.842	354.117	307.073	421.554	446.586	456.791
Rv1497	lipL	19585.9	19784.8	20619	3097.4	3054.74	3043.89	22564.1	22675.1	22479.8	3284.75	3489.19	3035.66	23294	25733.9	24968.3	6751.44	6360.93	6109.26	28823.1	29424.8	35822.8	6155.7	6258.06	6245.84
Rv1029	kdpA	199.507	158.099	139.971	231.404	277.952	261.074	146.815	145.72	119.488	130.125	188.351	161.795	195.221	184.801	212.468	371.761	361.255	356.647	150.941	133.655	117.663	287.462	307.475	320.002
Rv0993	galU	752.935	750.128	750.875	1139.95	1199.22	1132.64	586.065	607.392	641.254	932.198	858.046	953.951	968.94	877.474	954.418	1391.72	1408.9	1371.62	1296.42	1255.25	1264.16	1707.17	1738.24	1765.81
Rv1519	Rv1519	209.073	199.585	205.379	8.21926	9.561	12.5263	168.3	174.319	130.11	13.2331	13.7114	18.4222	399.397	348.33	350.74	14.6162	17.0002	14.7486	335.425	304.513	219.543	25.1424	32.5026	29.0157
Rv2949c	Rv2949c	412.68	410.384	461.775	2072.52	1988.69	2027.94	418.959	453.501	369.086	2248.89	2375.68	2155.4	1165.95	955.914	1060.65	2487.94	2732.79	2821.67	997.889	972.788	627.06	4332.87	4139.54	4412.88
Rv3086	adhD	4382.33	4229.42	4259.32	1234.15	1239.52	1211.75	3676.33	3455.05	3607.22	976.308	1054.34	1034.85	5788.57	5909.65	5900.19	2078.68	2025.86	2028.6	4456.12	4614.54	4904.56	1956.92	1850.05	2002.09
Rv1368	lprF	1447.11	1437.46	1281.98	1079.88	1018.25	1073.31	818.819	886.574	792.606	843.977	819.798	779.34	2446.53	2355.88	2421.46	1398.08	1473.35	1409.83	2242.32	2314.85	1686.03	1558.83	1545.83	1517.94
Rv2947c	pks15	166.712	180.524	149.128	530.458	562.05	557.75	161.138	157.976	164.628	618.279	586.704	599.123	304.473	297.809	281.604	784.829	791.928	754.189	409.218	389.942	348.686	1138.11	1122.64	1139.9
Rv2898c	Rv2898c	73.7904	54.9421	58.8665	187.778	211.708	219.54	47.7446	28.5992	45.1401	127.185	144.331	138.567	121.789	101.042	92.7438	259.915	268.462	242.681	107.336	97.83	78.9206	267.348	252.87	253.68
Rv3274c	fadE25	1930.85	1862.42	1773.84	2122.47	2245.47	2163.75	1429.95	1353.69	1291.8	1660.75	1731.97	1675.62	2862.05	2595.19	2612	3107.54	3193.92	3103.91	2534.14	2582.16	2204.04	3160.4	3134.55	3235.67
Rv0860	fadB	10944.2	10587	10720.2	5139.57	4999.72	5170.73	10211.4	10118.7	10078.2	4287.52	4394.15	4325.22	8854.79	9326.48	9641.98	9794.16	9519.43	9463.9	9630.05	9417.86	10695.9	8060.66	8161.41	8179.95
Rv1361c	PPE19	226.837	205.192	206.687	610.754	635.807	610.492	251.853	209.727	169.939	713.116	663.921	665.603	453.127	477.292	406.386	917.011	959.806	884.244	429.344	460.214	553.879	1280.59	1272.15	1280.84
Rv0104	Rv0104	66.958	69.5185	51.0176	239.623	228.098	235.363	47.7446	39.4941	41.1571	150.71	161.65	144.174	119.998	111.678	77.5675	284.699	315.213	289.608	63.7307	73.028	74.6158	310.09	260.671	287.67
Rv0174	mce1F	6788.72	6729.84	6572.12	15508.5	15543.5	15293.3	3516.39	3475.48	3305.85	12089.9	12173.6	12020.1	17757.9	15395.7	15353.3	19271.2	19498.6	20061.4	14212	14010.4	11206.7	22498.3	21990	23409.9
Rv3460c	rpsM	3127.89	3038.63	3199.72	3001.93	3152.4	3038.62	3288.41	3083.26	2919.5	2509.14	2762.49	2623.16	5629.17	5250.22	5025.03	4191.05	4398.11	4346.81	5266.17	5687.92	4538.65	4792.98	4867.59	5062
Rv1078	Rv1078	1892.59	1850.09	1728.06	1708.97	1792.01	1681.82	960.859	941.049	970.511	1297.58	1179.9	1207.86	3574.87	3245.32	3396.11	2606.14	2746.96	2570.28	2358.04	2196.35	1958.67	2231.81	2325.24	2286.44
Rv2243	fabD	17511.6	17474.9	17594.5	2685.17	2626.54	2511.85	15062.2	14554.3	14933.4	3792.75	3925.07	3636.39	18227.2	20941	20622.8	4288.92	3910.77	3854.07	29042.8	27371.7	40908.1	6985.4	7381.35	6673.62
Rv0701	rplC	2836.83	2817.74	2709.17	8723.8	8807.73	8332.63	2067.34	2011.47	1938.37	6532.73	6631.99	6149.82	6361.69	6351.05	6090.74	12637.3	12359.2	11920.9	6450.22	6057.19	6580.54	11801.8	12086.4	11837.6
Rv2247	accD6	77030.3	78825.1	80313.5	12481.9	12427.3	12124.1	56946.1	54286.7	55219.6	14496.1	14216.6	13594	130793	145369	145522	20377.6	19405.1	17725.8	155043	153563	166682	25597.5	26896.6	25588.6
Rv2353c	PPE39	332.057	385.716	338.809	1767.14	1685.47	1741.16	383.15	409.921	386.346	1433.58	1488.05	1454.55	831.032	779.09	760.499	2554.03	2498.33	2847.15	820.114	749.57	535.225	2761.47	2628.81	2689.34
Rv1546	Rv1546	155.78	150.25	153.053	507.065	502.636	508.304	137.266	123.93	104.884	369.056	375.26	348.42	322.383	317.752	273.173	673.618	755.803	736.088	221.38	210.817	232.457	708.178	637.702	674.823
Rv0348	Rv0348	884.118	880.194	869.916	304.113	303.22	327.002	560.999	529.766	578.855	219.081	242.475	229.076	2029.22	1939.75	1991.46	708.57	726.761	705.921	912.356	664.141	685.892	433.287	425.134	416.998
Rv0309	Rv0309	3912.26	3923.31	3691.58	1418.77	1419.81	1468.87	4251.65	4366.14	4320.17	1586.5	1514.75	1653.19	6569.45	5661.03	5689.41	2414.22	2457.24	2547.48	5700.55	5674.14	4979.17	2905.62	2869.98	2991.11
Rv2145c	wag31	14073.5	14212.1	14843.5	4948.63	4918.45	4996.02	20576.7	18782.8	19168.6	5303.53	5908.9	5578.73	19224.8	18712.8	17999	9334.06	8928.67	9396.86	20419	21066.5	22780.8	10521.3	9982.86	10383.5
RVnc0036a	MTS2823	1.38835e+06	1.39181e+06	1.33851e+06	310140	313068	310642	638895	744775	720042	236610	209839	208946	1.87912e+06	1.59445e+06	1.70084e+06	287065	331388	347452	1.63001e+06	1.60425e+06	1.16686e+06	399602	389036	414547
Rv1013	pks16	7503.39	7190.68	7338.69	2098.44	2050.15	2075.41	6741.53	6464.77	6704.63	2128.32	2234.24	2263.53	9284.63	10459.2	10631.8	3677.58	3584.93	3526.92	11917.6	10961.1	12539.8	4099.89	4027.73	4004.17
Rv2058c	rpmB2	2.73298	6.7276	6.54072	12.0128	10.2439	9.88919	2.38723	0	3.98295	11.7627	11.5465	16.8203	3.58203	5.31802	11.8038	8.89685	9.20847	7.37429	3.35425	2.75577	2.86984	25.9805	25.3521	22.3836
Rv2031c	hspX	446987	436126	407866	11593.6	11452	12444.6	236024	220128	226792	5993.12	6478.28	6972.41	536755	479788	514989	18190.9	17311.2	21583.2	433651	410759	328650	11848.8	11119.2	12635.1
Rv0707	rpsC	1876.19	1966.7	1949.14	6979.42	7206.26	7024.62	1457.4	1329.18	1334.29	5635.83	5622.4	5386.5	5197.53	4818.13	4772.09	9794.16	9911.85	9878.2	5906.83	5756.81	5314.94	9944.66	9973.11	10522.8
Rv2946c	pks1	1479.91	1420.65	1523.99	5092.78	5095.33	4998.65	1612.57	1636.96	1613.09	5857.11	5607.97	5319.22	2398.17	2490.16	2448.44	7880.7	7682.7	6904.35	2763.9	2780.58	3013.33	10028.5	10270.2	10353.6
Rv3005c	Rv3005c	1371.95	1352.25	1293.76	5811.65	5921.68	6144.48	894.017	941.049	922.716	4479.4	4648.89	4466.19	2665.03	2604.5	2507.45	7589.65	7669.24	7981.66	1869.99	2069.59	1898.4	8184.69	8026.2	8608.56
Rv3337	Rv3337	1156.05	1204.24	1144.63	621.502	675.417	652.686	473.865	514.785	539.025	461.688	351.445	374.051	2523.54	2883.7	2743.53	708.57	755.094	744.803	2200.39	2145.37	2080.63	679.683	733.259	742.803
Rv3084	lipR	1345.99	1370.19	1496.52	455.853	484.879	468.747	757.945	723.15	732.862	430.811	386.806	374.852	1844.75	2318.66	2230.91	974.84	895.346	761.563	1346.73	1238.72	1792.21	678.007	734.559	754.409
Rv3705c	Rv3705c	953.809	937.379	919.626	520.975	496.489	527.423	737.654	738.131	759.415	495.506	521.034	471.769	1871.61	1816.1	1708.17	664.722	704.802	667.708	1574.82	1656.22	1578.41	907.641	891.872	899.488
Rv2463	lipP	2000.54	1841.12	1925.59	1911.93	1848.69	1986.41	1794	1735.02	1725.94	1663.69	1502.48	1490.6	2382.05	2454.27	2247.77	3030.65	3096.17	2920.89	2582.77	2493.98	2538.37	2791.65	2868.03	2750.69
Rv0032	bioF2	210.439	205.192	184.448	230.139	260.196	233.385	136.072	149.805	151.352	206.583	247.527	203.445	320.592	312.434	288.349	322.193	306.004	306.368	238.152	278.333	186.54	394.736	394.582	398.759
Rv2636	Rv2636	75.1569	47.0932	52.3258	68.9153	65.5612	75.1578	31.034	42.2178	33.1912	61.0192	52.6807	54.4657	125.371	128.962	118.038	84.52	79.3345	79.7764	87.2105	101.964	76.0508	105.598	95.5577	102.799
Rv3526	kshA	2420.05	2412.97	2316.72	829.513	920.588	909.805	2508.98	2651.55	2494.65	726.35	780.829	848.223	2700.85	2470.22	2495.65	1062.54	1121.31	1226.81	3486.74	3404.76	2686.17	1366.07	1385.26	1478.97
Rv1075c	Rv1075c	1056.3	1056.23	1118.46	263.016	265.659	264.371	1531.41	1436.77	1396.69	308.772	333.404	293.154	836.405	830.941	794.224	602.444	603.509	589.943	1031.43	1019.64	1267.03	541.4	570.096	567.05
Rv0064A	vapB1	385.35	440.658	354.507	94.8376	116.098	97.5733	297.21	258.754	274.823	84.5447	71.4437	77.6937	585.663	473.304	485.64	113.117	130.335	108.603	392.447	388.564	370.209	143.312	138.461	138.447
RVnc0008	F6	314.292	291.529	279.943	345.841	426.148	356.011	371.214	377.237	365.103	291.863	202.785	281.139	612.528	559.722	438.425	521.101	528.424	559.105	368.967	446.435	388.863	438.316	458.937	491.61
Rv0636	hadB	601.255	604.363	582.124	1499.07	1487.42	1470.85	405.829	443.968	462.022	1021.15	1063.72	1092.52	1038.79	902.734	846.498	1835.93	1901.9	1820.78	756.383	795.041	589.752	1883.17	1903.35	1889.34
Rv1648	Rv1648	2234.21	2242.53	2285.33	550.058	598.929	592.033	2111.5	2057.78	2039.27	512.415	560.003	450.143	2939.06	3084.45	3281.44	890.956	810.345	791.731	2507.3	2524.29	2310.22	885.013	928.275	910.265
Rv3623	lpqG	195.408	201.828	190.989	499.478	506.05	500.393	164.719	142.996	144.714	428.605	481.343	413.299	347.457	316.422	291.721	582.743	494.424	496.759	275.048	300.379	315.682	770.196	855.469	734.513
Rv1865c	Rv1865c	170.811	167.069	153.053	216.23	208.293	197.784	101.457	170.233	138.075	129.39	129.898	131.358	250.742	263.242	246.193	251.654	255.004	272.178	206.286	225.973	173.625	217.901	230.769	248.706
Rv3237c	Rv3237c	992.071	1014.75	941.864	412.86	423.416	386.997	633.809	629.182	670.463	308.772	298.764	286.746	1701.47	1750.96	1733.47	587.192	611.301	636.87	1044.85	1001.72	941.307	552.295	506.391	538.864
Rv3496c	mce4D	2171.35	2202.17	2132.28	1463.66	1464.88	1424.7	1569.6	1570.23	1573.26	1230.68	1180.62	1195.84	3361.74	3624.23	3552.93	2184.81	2198.7	2115.08	3258.65	3224.26	3145.34	2111.12	2087.32	2225.09
Rv0519c	Rv0519c	168.078	185.009	193.605	803.591	793.563	841.899	133.685	126.653	119.488	588.137	614.127	614.341	234.623	255.265	241.134	1214.42	1191.43	1244.24	134.17	133.655	142.057	1115.48	1032.93	1082.7
Rv3806c	ubiA	1050.83	1136.96	1106.69	1414.34	1459.42	1480.08	1209.13	1184.82	1230.73	1165.25	960.52	1022.03	1359.38	1320.2	1409.71	1950.95	1968.49	1843.57	1427.23	1588.7	1344.52	1847.97	1845.5	1891.83
Rv3096	Rv3096	706.475	657.062	668.462	1128.57	1145.27	1176.15	488.188	552.917	496.541	1186.57	1127.94	1110.94	983.268	1033.03	1064.02	2347.5	2265.99	2322.9	960.993	1009.99	891.085	2023.96	1996.96	2054.31
Rv0721	rpsE	2316.2	2363.63	2230.39	4846.83	4899.33	4616.27	1285.52	1297.86	1267.9	3729.53	3857.24	3535.47	4593.96	5319.35	5372.39	6818.16	6747.68	6101.22	4885.46	4925.95	6105.58	6429.75	6702.04	6547.61
Rv2468A	Rv2468A	252.8	281.438	257.704	495.685	529.953	495.778	196.946	224.708	188.526	349.942	451.755	382.061	395.815	474.633	443.484	645.657	654.51	712.625	427.667	381.675	370.209	705.664	648.753	736.171
Rv1252c	lprE	38.2617	24.6679	31.3955	178.927	215.805	167.457	14.3234	13.6187	17.2594	147.034	162.372	126.553	30.4473	35.8966	65.7638	289.148	299.629	274.19	33.5425	35.8251	31.5682	270.7	252.87	243.732
Rv0987	Rv0987	1570.1	1526.04	1474.28	671.45	644.002	646.753	897.598	881.127	840.402	474.186	579.487	543.856	2786.82	2496.81	2576.59	883.965	927.222	898.993	1876.7	1832.59	1539.67	927.755	899.673	977.416
Rv1030	kdpB	269.198	267.983	281.251	384.408	377.66	416.664	274.531	235.603	215.079	260.251	277.836	283.542	311.637	327.058	374.348	569.398	569.508	512.848	325.362	362.384	340.076	472.677	492.74	474.2
Rv3864	espE	8969.63	9003.77	8547.42	9419.27	9567.83	9591.85	6969.51	6588.7	6593.1	7361.27	7764.99	7713.31	14261.9	12953.4	13393.9	12288.5	12261.4	12891.6	9400.28	10505	8092.95	13442	12810.6	13777.5
Rv0675	echA5	400.381	396.928	378.054	190.94	191.22	143.723	249.465	287.354	252.253	152.181	138.557	142.572	619.692	873.485	836.38	254.196	233.045	207.151	690.975	697.211	845.168	235.501	268.472	254.509
Rv1539	lspA	2025.14	2152.83	2191.14	2415.83	2469.47	2316.71	2560.3	2620.23	2395.08	1778.38	1801.97	1660.4	2754.58	2407.73	2517.57	3133.6	3377.38	3309.05	2621.35	2990.01	2323.14	3004.52	2891.43	3271.32
Rv1359	Rv1359	31.4292	38.1231	47.0932	84.7216	101.756	97.5733	51.3254	43.5797	41.1571	66.1654	77.2169	77.6937	51.9395	66.4753	35.4113	141.714	165.044	156.871	26.834	49.6039	18.654	124.874	129.36	132.643
Rv1517	Rv1517	50.5601	37.0018	47.0932	34.1415	28.683	24.3933	25.0659	19.0661	34.5189	21.32	25.2579	28.0338	69.8497	66.4753	70.8225	34.3164	39.6672	44.2457	62.0536	62.0049	37.3079	41.0659	53.9544	34.8189
Rv2438A	Rv2438A	1.36649	0	0	0	2.04879	1.31856	0	4.0856	0	0	0	0.800966	0	0	3.3725	2.54196	0.708344	0	0	0	0	2.51424	0	0.829021
Rv2767c	Rv2767c	25.9633	37.0018	19.6222	31.6125	44.3904	47.4681	27.4531	19.0661	30.5359	33.0827	30.3094	32.8396	26.8653	42.5442	23.6075	49.5681	48.8757	46.9273	21.8026	30.3135	34.4381	63.6941	51.3542	53.8864
Rv1553	frdB	17.7644	31.3955	24.8547	67.0186	81.2685	73.8393	11.9361	19.0661	22.57	60.2841	60.6189	59.2715	42.9844	25.2606	32.0388	110.575	95.6264	118.659	25.1569	23.4241	20.0889	116.493	103.358	94.5084
Rv2120c	Rv2120c	539.763	528.117	570.351	514.652	498.538	495.119	337.793	390.855	354.482	389.641	324.744	369.245	1062.07	1029.04	1006.69	660.909	663.718	663.016	935.836	858.423	754.768	652.864	607.149	624.253
Rv3569c	hsaD	1250.34	1286.09	1310.76	587.361	570.246	582.803	1715.22	1744.55	1630.35	511.679	461.858	455.75	1151.62	1201.87	1107.87	629.134	695.594	722.01	1714.02	1722.36	1364.61	819.642	835.318	826.534
Rv0391	metZ	662.747	727.702	724.712	861.758	929.466	872.226	802.109	808.948	695.688	720.468	664.643	719.268	822.077	820.305	930.81	1209.34	1303.35	1252.96	920.742	925.94	806.425	1187.56	1229.9	1231.1
Rv2026c	Rv2026c	180.377	162.584	231.542	141.624	137.952	143.723	198.14	157.976	169.939	99.9833	98.1448	114.538	279.399	252.606	263.055	170.311	177.086	174.972	229.766	210.817	153.536	176.835	172.914	192.333
Rv2301	cut2	1158.78	1179.57	1049.13	741.63	725.27	733.118	732.879	753.111	679.756	574.904	568.663	615.943	1683.56	1700.44	1682.88	853.462	907.388	830.613	1329.96	1264.9	1030.27	1018.27	1042.03	979.903
Rv1700	Rv1700	467.339	440.658	431.688	837.732	880.295	840.581	512.061	563.812	519.111	675.623	663.199	655.19	437.008	450.702	435.053	1240.47	1244.56	1090.05	496.429	569.067	393.168	1143.14	1135.64	1165.6
Rv3169	Rv3169	735.171	747.885	771.805	236.462	216.488	222.177	381.957	433.073	406.261	244.077	230.929	229.076	1282.37	1322.86	1322.02	291.689	285.463	263.463	1402.08	1410.96	1559.76	424.069	423.184	367.256
Rv1009	rpfB	1355.56	1271.52	1275.44	2450.6	2533.67	2351.65	1354.75	1240.66	1278.53	2020.99	2082.69	1928.73	1706.84	1930.44	1878.48	3193.97	3249.17	2894.07	1722.41	1765.07	2021.8	3514.91	3564.24	3330.18
Rv2401A	Rv2401A	99.7537	69.5185	75.8724	91.0441	79.2197	98.8919	64.4552	91.245	58.4166	58.8137	51.959	76.8928	168.356	132.951	116.351	83.8846	94.2097	96.5362	119.076	122.632	113.359	109.789	109.209	104.457
Rv2030c	Rv2030c	315065	309645	326362	4935.98	4900.01	4891.19	244138	239888	243613	3046.55	2797.13	2738.5	273802	342439	343265	8954.04	7477.28	8363.79	325087	318869	418715	4803.04	4996.3	5013.09
Rv1157c	Rv1157c	415.413	371.139	412.066	1004.01	1075.61	1052.87	356.891	442.606	374.397	1186.57	1107.02	1163	449.545	445.384	542.973	1915.36	1806.28	1695.42	592.025	520.841	624.19	1977.03	1995.66	1978.04
Rv3043c	ctaD	5338.87	5354.05	5007.58	3366.1	3359.33	3549.56	4508.28	4679.37	4429.04	2461.35	2189.5	2322	4993.36	4496.39	4950.83	4427.45	4388.19	4511.05	5217.54	5022.4	3867.11	4043.74	3917.87	4038.16
Rv2023c	Rv2023c	390.816	352.078	396.368	175.766	156.391	191.85	245.885	325.486	258.892	155.856	137.836	149.781	463.873	475.963	411.445	245.299	229.503	211.173	424.313	485.016	513.701	284.109	230.119	251.193
Rv3686c	Rv3686c	318.392	354.32	405.525	303.48	319.611	299.313	94.2955	118.482	119.488	238.931	211.444	221.067	875.807	872.156	929.124	414.339	429.965	366.703	405.864	387.186	340.076	372.946	419.284	359.795
Rv1552	frdA	65.5915	88.5801	100.727	389.466	336.684	353.374	58.4871	84.4356	59.7442	261.721	268.455	302.765	128.953	122.314	133.214	433.404	442.006	471.284	83.8562	90.9405	93.2698	455.916	484.939	486.635
Rv2395	Rv2395	680.511	724.338	716.863	1027.41	1008.69	1023.2	870.145	886.574	872.265	817.511	794.54	801.767	1232.22	1227.13	1155.08	1534.07	1484.69	1470.84	826.823	887.359	723.2	1350.15	1335.21	1443.33
Rv3558	PPE64	189.942	180.524	175.291	193.469	194.635	209.651	99.07	99.4161	99.5737	154.386	171.032	165.8	340.293	304.457	317.015	256.102	229.503	239.329	293.497	267.31	275.505	274.89	292.524	270.261
Rv0934	pstS1	1037.17	1031.57	1000.73	2135.11	2132.1	2008.16	600.388	524.318	594.787	1737.95	1670.63	1660.4	2009.52	2229.58	2203.93	2440.91	2456.54	2364.47	1854.9	1668.62	1541.1	2805.89	2927.84	2920.64
Rv1641	infC	7700.17	7425.03	6968.49	8828.12	9509.1	8902.9	6912.22	7329.56	6988.74	6318.06	7398.39	6363.68	9282.84	9315.84	10593	12176.6	12570.3	12180.3	11070.7	11326.2	7777.27	11609.9	10920.9	11697.5
Rv0973c	accA2	308.826	338.623	357.123	361.015	343.513	334.254	472.671	464.396	460.694	302.156	259.795	294.756	148.654	204.744	168.625	700.309	699.844	672.401	206.286	232.863	286.984	510.391	505.091	441.868
Rv2114	Rv2114	281.497	254.528	259.013	531.723	563.416	517.534	127.717	118.482	147.369	466.099	453.92	487.788	564.17	522.496	494.071	594.818	641.051	612.736	390.77	332.071	264.025	807.071	806.715	781.767
Rv3615c	espC	13895.8	13232.1	12607.9	3141.65	3168.11	3117.73	4838.91	4969.45	4531.27	2308.44	2148.36	2428.53	19128.1	18174.3	18412.2	4123.05	4558.9	4276.42	11917.6	10859.1	9227.97	3892.88	3860.66	3964.38
Rv0755c	PPE12	1235.31	1129.12	1199.57	1031.2	1055.12	971.118	929.826	1090.85	928.027	723.409	764.952	745.7	1756.99	1554.19	1495.7	1239.2	1262.98	1293.18	1645.26	1474.34	1206.77	1273.04	1297.51	1230.27
Rv1245c	Rv1245c	672.313	565.118	656.689	706.224	670.636	660.598	580.097	631.905	566.906	571.964	558.56	543.055	734.317	695.331	743.636	854.097	932.18	825.25	769.8	789.529	756.203	926.079	947.777	970.784
Rv0504c	Rv0504c	308.826	355.442	306.106	346.473	361.952	353.374	354.503	313.229	357.138	352.882	330.517	328.396	433.426	448.043	451.915	428.955	417.923	405.586	415.927	338.96	472.089	559.838	589.598	568.708
Rv2768c	PPE43	136.649	145.765	133.431	166.282	191.903	161.523	97.8764	64.0077	77.0036	144.094	114.021	128.956	223.877	240.64	222.585	224.963	216.045	205.81	155.973	169.48	223.847	210.358	229.469	217.204
Rv1387	PPE20	21246.2	21287.3	20820.4	7755.82	8180.8	7672.69	14660	14103.5	14286.8	6875.32	6834.06	6920.35	24796.6	24399.1	26175.7	7228.69	7074.23	7228.82	20876.8	19530.2	19028.5	11678.6	11411	11927.1
Rv3253c	Rv3253c	266.465	263.498	215.844	360.383	327.123	361.285	195.753	211.089	228.356	273.484	258.352	240.29	338.502	331.047	305.211	423.236	464.673	450.502	296.851	268.688	264.025	450.049	416.034	447.671
Rv3805c	aftB	1615.19	1632.56	1501.75	2702.87	2658.64	2582.4	1755.81	1770.42	1696.74	2069.51	1978.05	2004.02	2100.86	2296.06	2257.89	3458.33	3580.68	3439.77	2249.02	2204.62	2139.47	3347.29	3427.73	3485.2
Rv3876	espI	4133.63	4104.96	4023.85	3679.07	3594.25	3524.51	4674.19	4438.32	4305.57	3047.29	3015.79	2975.59	4153.37	3952.62	3982.92	4658.13	4802.57	4773.18	4321.95	4020.67	3673.39	5127.37	4960.55	5236.93
Rv0374c	Rv0374c	36.8952	52.6995	47.0932	18.3353	16.3903	21.0969	51.3254	35.4085	49.123	13.2331	10.1031	16.8203	48.3575	46.5327	47.215	13.9808	18.4169	20.7821	62.0536	42.7145	44.4825	26.8186	22.7518	19.0675
Rv0674	Rv0674	481.004	449.628	506.252	214.333	258.83	242.615	392.699	434.435	404.933	238.196	220.826	211.455	908.046	963.891	1021.87	343.164	354.88	293.631	711.101	722.013	726.069	388.869	378.981	368.914
Rv0667	rpoB	14089.9	14462.1	14477.2	36451.2	37499.6	36956.5	12346.7	11656.2	11660.7	29881.1	32165.5	30280.5	30510	29297	29745.5	52898.1	52584.6	51509.4	23919.2	23218.8	21693.1	52379.2	51134.4	52550.8
Rv0704	rplB	3272.74	3302.13	3289.98	9967.43	9856.71	9983.46	2181.93	2196.69	2029.98	7983.96	8296.12	7766.97	8953.29	8450.34	8503.76	13485.7	13483.3	13100.8	8095.48	8232.87	8088.64	13736.1	13466.5	13435.1
Rv3140	fadE23	32096.1	31648.9	31078.9	4933.45	4973.09	4893.83	25768.9	25974.9	24399.5	3943.46	4138.68	4165.83	48577.8	46506.1	48095.2	7822.87	7691.2	8075.52	33581.1	34281.8	28470.2	6943.49	6332.81	7406.47
Rv3525c	Rv3525c	143.481	107.642	133.431	278.19	309.367	301.95	81.1658	93.9687	88.9525	182.323	183.3	202.644	141.49	154.223	175.37	422.6	400.214	381.452	90.5647	88.1848	99.0095	295.842	323.076	339.07
Rv0708	rplP	1115.05	1130.24	1058.29	4368.22	4386.45	4316.3	725.717	645.524	666.48	3148.74	3374.45	3099.74	2799.36	2454.27	2404.59	5183.68	5215.53	5664.13	2814.22	2820.53	2562.77	5414	5100.31	5688.74
Rv3233c	Rv3233c	194.041	219.768	180.524	407.802	428.196	426.554	176.655	163.424	192.509	296.274	337.012	354.027	390.442	327.058	283.29	644.386	677.885	714.636	280.08	292.112	269.765	535.533	574.647	546.325
Rv1088	PE9	1.36649	2.24253	3.92443	14.5418	12.9756	11.2077	5.96807	2.72373	3.98295	17.6441	9.38149	12.8155	1.79102	5.31802	1.68625	15.8872	19.1253	17.4301	1.67712	5.51155	2.86984	29.3328	14.3012	24.8706
Rv2329c	narK1	352.554	328.531	347.966	248.475	240.391	258.437	165.912	186.576	181.888	272.013	274.228	277.134	990.432	805.68	846.498	326.006	349.213	349.944	288.465	311.402	268.33	446.697	466.088	469.226
Rv1371	Rv1371	254.167	202.949	206.687	191.572	180.976	167.457	103.844	111.673	107.54	147.034	179.692	160.193	440.59	337.694	374.348	242.757	267.754	249.385	368.967	351.361	271.2	281.595	241.17	298.448
Rv3246c	mtrA	5420.86	5642.21	5324.15	14567.7	15602.2	15820.7	3436.42	3412.83	3239.46	11698.1	11424.5	11675.7	7919.88	7401.36	7485.27	17736.5	18077.6	18327.8	5950.44	6036.52	4560.18	19604.4	18280.1	20471
Rv1863c	Rv1863c	2444.65	2550.88	2633.3	2437.33	2397.76	2382.63	2315.61	2511.28	2219.83	2000.4	1967.95	1923.92	3626.81	3678.74	3701.32	3441.17	3561.55	3354.63	3548.8	3447.47	2937.28	3158.72	3362.72	3348.42
Rv2387	Rv2387	565.726	540.451	531.107	423.608	424.099	406.116	602.775	621.01	629.306	549.908	489.281	490.992	852.524	764.466	713.284	458.188	505.757	457.206	1002.92	1054.08	919.784	844.785	870.42	846.431
Rv2746c	pgsA3	705.108	592.029	586.049	450.163	434.343	422.598	592.033	615.563	593.459	341.12	377.425	372.449	668.049	565.04	628.971	478.523	495.841	522.234	799.989	795.041	601.231	606.77	585.697	631.714
Rv2154c	ftsW	1827	1968.94	1939.98	5241.99	5285.19	5187.87	2402.75	2142.21	2229.12	4603.64	4338.58	4473.4	2108.03	2273.45	2187.07	8768.48	8241.58	7889.15	2019.26	1980.02	2288.7	7277.89	7331.29	7783.68
Rv0986	Rv0986	232.303	256.77	227.617	152.372	155.708	149.656	91.9083	123.93	111.523	108.805	127.733	110.533	370.741	349.66	394.583	162.685	179.211	174.972	216.349	208.061	167.886	197.787	193.716	189.017
Rv3874	esxB	24666.5	24191.3	24362.9	52454.1	49207.1	46980.2	20179.2	20846.1	18044.1	38936.2	44896.9	39349.1	26279.6	29677.2	28049.1	61285.3	63254.4	59291.3	25135.1	21736.2	27579.2	70020.8	67021.1	68473
Rv2401	Rv2401	16.3979	10.0914	17.0059	17.0708	12.9756	25.0526	7.16169	9.53306	15.9318	17.6441	17.3197	6.40773	19.7012	27.9196	13.49	20.9711	14.1669	22.7933	21.8026	15.1568	10.0444	20.952	24.0519	25.6997
Rv2456c	Rv2456c	634.051	655.941	640.991	1098.22	1010.73	997.489	529.965	537.937	488.575	880	860.932	812.18	986.85	1146.03	1091	1499.75	1474.06	1508.38	907.325	901.138	984.355	1437.31	1413.86	1400.22
Rv2029c	pfkB	25028.6	25264.4	25794	351.531	342.147	393.59	27673.9	27906	27038.9	186.734	181.857	201.043	22762	22923.3	23194.4	588.463	467.507	669.72	24843.3	25930.5	23278.7	315.956	284.723	349.847
Rv1555	frdD	9.56542	11.2127	11.7733	48.6833	51.9026	32.3047	4.77446	10.8949	15.9318	28.6717	41.8559	30.4367	16.1192	15.9541	25.2938	64.1844	48.1674	44.9161	20.1255	12.401	11.4794	56.1514	53.3043	59.6895
Rv0082	Rv0082	1710.84	1803	1822.25	177.662	160.488	158.886	1624.51	1705.06	1676.82	116.157	148.661	139.368	2602.35	2516.75	2419.77	231.318	211.086	196.424	2289.28	2241.82	2776.57	214.549	229.469	227.152
Rv2352c	PPE38	437.276	438.415	363.664	156.166	157.074	156.908	261.402	257.392	277.479	133.066	155.877	152.184	539.096	739.205	704.853	203.992	205.42	210.502	813.406	848.778	606.971	223.767	241.17	266.945
Rv0347	Rv0347	938.778	861.133	902.62	508.33	531.319	532.038	728.105	670.038	669.135	355.823	375.981	435.726	2294.29	2038.13	2126.36	1088.59	1118.47	1216.09	914.033	818.465	667.238	661.245	618.85	653.269
Rv2560	Rv2560	326.591	251.164	243.315	522.871	554.538	496.437	113.393	103.502	91.6078	344.795	341.342	355.629	458.5	434.748	537.914	680.609	665.843	597.317	316.977	260.421	232.457	548.943	614.95	558.76
Rv2845c	proS	1637.05	1781.69	1686.2	1175.35	1186.25	1256.59	2656.99	2464.98	2452.17	1286.55	1278.05	1247.91	3429.8	3230.7	3053.8	2036.11	1935.9	2001.78	2936.65	3123.67	3031.99	2112.8	2143.87	2048.51
Rv3030	Rv3030	762.501	688.458	739.102	563.968	630.343	601.922	555.031	574.707	625.323	582.256	618.457	577.497	1038.79	973.198	991.515	792.455	774.928	740.781	1234.36	1145.02	1139.33	1013.24	977.679	951.716
Rv0994	moeA1	1954.08	1748.06	1781.69	2159.77	2205.18	2152.55	1571.99	1639.69	1567.95	1861.45	1919.6	1839.02	2018.48	2143.16	2004.95	2549.58	2525.95	2501.9	2482.14	2558.74	2425.01	3137.77	3063.05	3083.96
Rv1010	ksgA	483.737	441.779	512.793	1230.36	1252.49	1222.96	560.999	548.832	523.094	1179.95	938.149	1003.61	694.915	739.205	735.205	1596.98	1562.61	1473.52	617.182	604.892	681.587	1669.46	1722.64	1757.52
Rv3168	Rv3168	220.005	230.981	185.757	107.483	101.756	76.4764	204.108	156.614	160.646	86.0151	100.31	93.7131	333.129	308.445	317.015	116.294	114.043	85.8099	328.716	259.043	315.682	167.616	155.363	140.105
Rv2169c	Rv2169c	2865.53	2845.78	2681.7	1093.79	1020.3	1014.63	2750.09	3184.04	2741.6	848.388	785.159	806.573	2958.76	3021.97	3212.31	1289.41	1343.02	1254.3	2834.34	3100.25	2848.32	1354.34	1298.81	1373.69
Rv1830	Rv1830	1023.5	1029.32	994.19	1386.53	1392.49	1464.26	877.306	834.823	918.733	1250.53	1166.19	1287.95	1714	1538.24	1522.68	2123.17	2076.86	2103.01	1480.9	1419.22	1218.25	2053.3	2010.61	2036.9
Rv1920	Rv1920	644.983	678.366	667.154	442.576	534.733	502.371	452.38	407.198	428.831	356.558	352.167	337.207	1271.62	1260.37	1229.28	602.444	663.718	670.39	981.118	1034.79	878.171	583.304	557.095	585.289
Rv0083	Rv0083	2220.54	2157.32	2304.95	195.365	215.805	233.385	2035.11	2064.59	2291.52	164.678	143.609	143.373	2815.48	3540.47	3471.99	282.157	264.212	203.799	2889.69	2961.08	4045.04	241.367	250.92	253.68
Rv2528c	mrr	19.1308	15.6977	9.15701	44.2576	41.6587	45.4903	11.9361	17.7042	11.9488	35.2882	34.6394	34.4415	37.6114	18.6131	30.3525	55.923	47.459	55.6424	28.5111	23.4241	11.4794	56.1514	55.2545	61.3476
Rv0643c	mmaA3	584.857	552.785	572.967	1401.7	1354.93	1476.13	475.058	458.949	519.111	1126.28	1169.8	1191.04	1074.61	869.497	878.536	1718.36	1777.23	1914.63	877.136	952.12	674.412	1967.81	1871.5	1897.63
RVnc0006	C8	27.3298	33.638	30.0873	27.1868	37.5611	27.0304	32.2276	29.961	30.5359	22.7903	20.9279	29.6358	37.6114	38.5557	26.98	38.1293	41.7923	26.8156	40.251	55.1155	37.3079	37.7136	43.5535	38.964
Rv2959c	Rv2959c	132.549	161.462	132.123	345.841	374.928	361.944	186.204	187.937	183.216	482.273	593.199	513.419	222.086	182.142	210.781	410.526	469.632	406.927	169.39	173.614	146.362	890.041	827.517	892.856
Rv0289	espG3	34140.4	33400.3	33246.5	3450.82	3700.79	3463.19	25324.9	24826.8	25226.7	4420.59	3793.01	4132.18	45325.3	49695.6	52762.8	4452.24	4432.11	4202.67	55747.6	55833.4	54341.8	6630.05	6703.34	6877.56
Rv3238c	Rv3238c	1738.17	1693.11	1771.23	842.79	870.051	903.212	950.117	1002.33	916.078	723.409	677.632	680.02	3032.19	2927.57	2698	1133.08	1189.31	1191.95	1703.96	1762.32	1495.19	1152.36	1077.79	1174.72
Rv3390	lpqD	762.501	745.642	667.154	407.169	431.611	417.983	422.539	358.171	390.329	351.412	370.93	394.876	1285.95	1139.39	1101.12	374.303	384.631	430.39	919.064	819.843	654.323	601.742	634.451	587.776
Rv3130c	tgs1	421185	426512	415451	32987.7	31610.7	34740	353356	360194	340145	22065.4	21094.6	22162.7	537430	517632	518561	45195.3	44503.1	50741.8	468815	483568	384722	35486.8	33607.1	37614.3
Rv0242c	fabG4	5153.03	5348.44	5555.69	5022.6	5162.94	4953.82	4641.97	4928.59	4895.04	4096.38	3946.72	3658.81	7694.21	9079.19	8962.42	6829.6	6629.39	6174.96	7533.64	7863.6	9051.47	6275.54	6416.02	6418.28
Rv0954	Rv0954	3761.94	3822.4	3673.27	5041.57	5253.77	5301.92	2802.61	3007	2757.53	4275.76	3934.45	4141	4518.74	4342.16	4281.39	6576.68	6579.1	6546.36	3952.98	3709.27	3181.22	6677.82	6599.98	6871.76
Rv3144c	PPE52	3432.62	3543.2	3426.03	1880.95	1890.35	1828.84	1427.56	1570.23	1464.4	1526.22	1673.51	1593.92	6207.66	6180.87	6166.62	2181	2144.86	2121.78	4690.92	4482.27	5056.66	2629.9	2625.56	2561.68
Rvnt23	valV	5.46596	3.3638	2.61629	7.58701	8.87807	7.91135	2.38723	1.36187	5.3106	4.41103	2.16496	8.81063	8.95508	1.32951	3.3725	7.62587	6.37509	6.7039	6.7085	2.75577	4.30476	10.057	6.50053	9.11923
Rv0383c	Rv0383c	7933.83	8102.27	8041.17	3602.56	3782.06	3711.74	9234.99	9629.75	9043.94	3711.88	3571.46	3311.19	9662.54	9403.59	9685.82	5084.55	5357.2	5561.56	11032.1	11497.1	10477.8	5667.1	5639.86	5909.26
Rv1662	pks8	750.202	769.189	736.485	764.391	792.88	790.476	430.895	559.727	475.298	590.343	627.838	637.569	1158.79	1201.87	1165.2	935.44	977.514	894.3	803.343	779.884	543.835	1045.09	970.529	998.97
Rv2186c	Rv2186c	214.539	210.798	200.146	403.376	441.172	411.39	115.781	148.443	150.024	267.602	329.074	284.343	365.367	373.591	345.681	535.717	563.842	597.317	291.82	246.642	200.889	480.22	496.64	452.646
Rv1697	Rv1697	550.695	498.964	427.763	11275.6	11614.6	11650.1	521.609	536.575	543.008	9499.15	9805.1	9811.04	805.958	768.454	726.774	15698.5	15423.5	15972.7	484.689	467.104	473.524	15610.9	15245	16331.7
Rv3499c	mce4A	1314.56	1308.52	1359.16	999.588	985.466	1053.53	958.472	949.22	967.856	824.127	785.159	842.617	2346.23	2136.52	2303.42	1492.13	1457.06	1524.47	2071.25	2287.29	1838.13	1289.81	1311.16	1371.2
Rv3733c	Rv3733c	1089.09	1040.54	960.178	464.072	480.782	427.213	790.173	828.014	766.053	414.637	416.394	385.265	1676.39	1631.3	1465.35	639.302	648.135	557.764	1049.88	1022.39	1023.1	668.788	657.853	644.149
Rv0854	Rv0854	576.658	631.273	597.822	331.299	363.318	403.479	367.633	379.96	342.533	253.634	323.301	328.396	888.344	764.466	723.401	359.051	385.339	391.508	677.558	591.113	499.352	472.677	464.788	528.915
Rv0732	secY	1112.32	1176.21	1145.93	2556.82	2578.06	2541.52	1170.94	1258.36	1079.38	1829.84	1903	1876.66	1452.51	1389.33	1298.41	3424.65	3407.13	3493.4	1749.24	1842.23	1252.69	3056.48	3026.64	2985.3
Rv1861	Rv1861	541.13	502.328	443.461	132.14	137.952	148.338	391.505	354.085	292.083	94.8371	125.568	108.931	546.26	551.745	542.973	158.872	168.586	155.53	566.868	508.44	279.809	178.511	187.865	167.462
Rv0039c	Rv0039c	817.16	729.945	803.201	188.411	210.342	181.961	725.717	867.508	916.078	259.516	204.228	199.441	651.93	951.926	976.339	331.09	323.713	249.385	1135.41	1160.18	2505.37	357.86	398.482	322.489
Rv2837c	Rv2837c	1127.35	1203.12	1097.53	1722.88	1812.49	1680.5	1200.78	1187.55	1159.04	1454.9	1367.53	1344.02	1524.16	1527.6	1517.63	2688.12	2606	2425.47	1834.77	1800.9	2000.28	2265.33	2176.38	2283.95
Rv1079	metB	1045.36	1037.17	1034.74	1325.2	1410.25	1309.33	617.099	567.898	549.647	1207.89	1061.55	1042.86	1968.33	2092.64	2092.64	1770.47	1814.78	1725.58	1512.77	1448.16	1500.93	1821.99	1776.59	1746.75
Rv3316	sdhC	183.11	165.947	190.989	201.056	217.171	210.969	138.459	147.081	135.42	141.888	154.434	154.586	327.756	295.15	293.408	253.56	262.087	256.089	254.923	268.688	231.022	229.634	237.919	260.313
Rv2600	Rv2600	195.408	210.798	243.315	271.236	222.635	252.504	170.687	162.062	171.267	188.939	186.187	190.63	365.367	370.932	386.151	308.212	277.671	255.419	342.133	303.135	274.07	295.842	306.825	309.225
Rv0757	phoP	4714.39	4708.2	4565.42	2644.7	2755.62	2796	4594.22	4801.94	4556.49	2441.5	2717.02	2680.83	5790.36	5445.65	5772.04	3536.5	3856.22	3815.19	5360.09	5304.86	4478.38	4218.9	4034.23	4381.38
Rv1550	fadD11	132.549	165.947	145.204	548.794	553.172	553.135	116.974	144.358	119.488	463.893	472.683	434.925	229.25	231.334	200.664	668.534	722.511	661.675	219.703	241.13	223.847	704.825	764.462	738.658
Rv0713	Rv0713	903.249	930.651	834.596	857.964	870.734	888.049	392.699	486.186	492.558	666.065	685.57	690.433	1748.03	1560.84	1622.17	1073.98	1209.14	1156.42	1033.11	1021.01	820.774	1115.48	1075.84	1096.79
Rv1738	Rv1738	100035	99954.2	94591.9	11190.8	10597	11661.3	96398.7	98864.6	90327.9	7213.5	8262.93	7852.67	115761	101302	101398	13333.2	13401.9	16588.8	120532	125643	94350.3	12787.4	11627.5	13098.5
Rv2968c	Rv2968c	653.182	626.788	613.52	594.948	578.441	561.706	583.677	505.252	487.247	460.953	437.322	453.347	1117.59	1041	1087.63	734.625	772.095	740.111	759.738	872.202	690.196	693.93	671.504	808.296
Rv2783c	gpsI	7571.72	7708.71	7754.68	13346.8	13421.6	13606.9	6161.44	5944.54	5889.45	11100.4	11138	11012.5	10065.5	10241.2	10770.1	18556.9	18194.5	17727.1	11630.9	11075.5	10972.8	17429.6	17757.5	18056.1
Rv3162c	Rv3162c	140.748	154.735	134.739	82.8248	87.4149	75.1578	115.781	121.206	152.68	49.9917	67.1137	65.6792	202.385	208.732	234.389	110.575	114.043	105.251	137.524	110.231	106.184	93.865	98.808	100.312
Rv1554	frdC	19.1308	13.4552	10.4652	42.9931	35.5123	34.2825	7.16169	0	9.29354	36.0234	17.3197	33.6406	25.0742	22.6016	8.43125	38.1293	40.3756	40.8938	15.0941	19.2904	7.1746	39.3898	44.2036	56.3734
Rv0681	Rv0681	706.475	653.699	617.444	870.609	851.612	811.572	606.356	592.411	643.91	693.267	715.88	704.049	752.227	888.11	856.615	1111.47	1111.39	1053.18	888.876	1037.55	1020.23	1132.25	1124.59	1121.67
Rv3866	espG1	4894.76	5046.82	5057.29	3662	3775.23	3635.92	4964.24	4611.28	4540.56	3619.99	3502.18	3566.7	6829.15	6502.61	6777.04	5092.81	5136.2	5025.24	5609.98	5842.24	6168.72	5753.42	5615.15	5708.64
Rv1885c	*MtCM	13.6649	16.819	10.4652	291.468	295.708	297.994	11.9361	6.80933	11.9488	222.757	241.032	286.746	19.7012	13.2951	20.235	386.377	405.173	394.189	30.1882	16.5346	22.9587	422.392	384.181	391.298
Rv1352	Rv1352	2272.47	2304.2	2250.01	1267.03	1259.32	1240.1	1926.49	2143.58	1994.13	1117.46	1108.46	1072.49	3435.17	3088.44	3374.19	1635.75	1695.07	1647.82	3186.54	3311.06	2650.3	1744.88	1748.64	1773.28
Rv1797	eccE5	6837.91	6820.67	6722.56	5467.7	5475.04	5327.63	7775.2	7623.72	7318	4113.29	4461.26	4032.87	8081.07	7786.91	8104.12	7135.27	7177.65	7054.51	7258.6	7754.75	6355.26	6725.59	6434.22	6962.95
Rv2077c	Rv2077c	136.649	121.097	92.8783	122.024	135.903	118.67	69.2296	76.2644	59.7442	94.102	115.465	113.737	188.057	227.345	175.37	132.817	148.044	165.586	145.91	151.568	121.968	160.073	177.464	178.24
Rv1162	narH	13939.6	14298.4	14245.7	3734.71	3853.77	3753.28	15909.7	15700.9	14892.2	3286.22	3474.04	3344.03	15671.4	15608.4	16058.2	4998.12	5078.12	5161.33	19558.6	19884.3	18932.3	5414	5378.54	5272.57
Rv1592c	Rv1592c	9844.19	9709.05	9498.44	1691.27	1643.81	1739.84	6619.78	6630.92	6521.41	1890.86	1988.88	1955.16	19774.6	19889.4	20454.2	2373.55	2227.74	2422.79	14342.8	13796.8	12113.6	3078.27	3213.21	2972.04
Rv2468c	Rv2468c	787.098	781.523	715.555	1014.76	1029.17	986.281	558.611	540.66	618.684	929.257	839.283	851.427	915.21	1212.51	1182.06	1307.2	1364.27	1113.52	1033.11	1001.72	1251.25	1407.97	1412.56	1339.7
Rv0114	gmhB	84.7223	93.0651	96.8027	79.6636	90.1466	92.9583	63.2616	55.8365	54.4336	80.8689	77.2169	81.6986	198.803	202.085	188.86	106.762	125.377	112.626	129.139	124.01	86.0952	140.797	109.859	132.643
Rv2457c	clpX	25206.3	25282.3	25049.7	20534.9	20296	21428.5	21061.3	21606	20035.6	17300.1	18000.2	17923.2	39610.1	35137.5	35207.2	26029.6	26050.8	28281.7	31796.6	31388.3	25896	28436.1	27119.5	28897.2
Rv2951c	Rv2951c	916.914	950.834	918.318	2316.57	2432.59	2421.53	612.324	774.901	665.152	2185.67	2058.15	1998.41	1864.45	1700.44	1674.45	2773.91	2791.58	2825.02	1573.14	1614.88	1351.69	3359.86	3212.56	3316.91
Rv2349c	plcC	274.664	272.468	228.925	1401.7	1328.98	1319.22	249.465	253.307	232.339	1125.55	1114.23	1200.65	282.981	285.844	234.389	1575.38	1519.4	1625.7	204.609	220.462	195.149	1757.45	1751.89	1934.11
Rv1095	phoH2	3566.54	3749.52	3712.51	11172.5	11238.3	11220.9	4089.32	4057	4065.26	8283.18	8754.37	8189.88	4309.19	4609.4	4419.66	14630.9	14136.4	13839.5	3630.98	4011.03	3561.47	13142.8	13192.2	13525.5
Rv1270c	lprA	1039.9	1009.14	936.632	414.124	448.001	438.421	586.065	644.162	541.681	360.234	401.239	374.852	1411.32	1341.47	1461.98	455.646	418.631	486.703	1492.64	1191.87	1073.32	631.074	583.747	581.144
Rv2337c	Rv2337c	1770.97	1550.71	1552.77	524.768	528.587	514.897	1371.46	1483.07	1331.63	413.902	414.951	430.92	1792.81	1806.8	1745.27	581.472	607.759	645.586	1591.59	1846.37	1621.46	655.379	675.405	655.756
Rv3311	Rv3311	491.936	533.723	460.467	1062.18	1006.64	1044.96	297.21	336.381	327.929	940.284	1021.14	1007.62	648.348	678.048	608.736	1656.08	1640.52	1774.52	588.671	520.841	443.39	1618.33	1526.97	1538.66
Rv0976c	Rv0976c	122.984	93.0651	125.582	206.114	217.171	183.939	131.298	128.015	140.731	161.003	158.764	155.387	59.1036	53.1802	55.6463	392.732	356.297	358.659	87.2105	79.9174	149.232	243.881	274.972	229.639
Rv0967	csoR	670.946	606.605	664.537	232.668	234.928	195.147	1530.21	1660.11	1566.63	266.867	212.166	226.673	596.409	648.799	639.089	258.644	230.92	216.536	615.505	603.514	539.53	386.355	367.93	358.137
Rv2250c	Rv2250c	60.1255	79.6099	79.7968	27.1868	21.1708	25.0526	115.781	115.759	128.782	24.2607	28.8661	26.4319	23.2832	21.2721	35.4113	33.0454	31.1671	24.8044	41.9281	35.8251	38.7428	39.3898	39.0032	48.0832
Rv2420c	Rv2420c	189.942	169.311	163.518	211.804	236.976	245.252	152.783	152.529	165.956	185.998	215.053	202.644	268.653	214.05	236.075	305.035	316.63	308.379	318.654	257.665	253.981	320.985	317.226	311.712
Rv3473c	bpoA	284.23	263.498	257.704	243.417	204.879	217.562	211.27	212.451	213.751	170.56	178.97	164.198	494.321	495.906	403.014	312.025	280.504	295.642	280.08	286.6	276.94	262.319	275.622	269.432
Rv3501c	yrbE4A	366.219	409.262	393.752	254.797	279.318	288.764	355.697	408.56	358.465	232.314	200.62	197.038	505.067	440.066	551.404	353.332	332.213	314.413	692.653	655.874	555.314	306.737	338.027	344.873
Rv0315	Rv0315	521.999	607.727	537.647	2564.41	2664.79	2672.72	660.069	656.419	629.306	2080.54	2081.97	2107.34	943.866	898.746	795.91	2846.36	3025.34	3119.32	704.392	632.45	561.054	3312.93	3259.36	3264.69
Rv2950c	fadD29	1898.05	1870.27	1731.98	6536.84	6489.87	6605.98	1651.96	1602.92	1546.71	7992.05	8663.45	8032.09	4416.65	3941.98	3937.39	7512.75	7929.91	8194.18	3857.39	3607.31	2973.15	12913.1	12572.7	13249.4
Rv1417	Rv1417	401.748	403.656	383.286	510.226	495.806	446.991	581.29	577.431	614.701	403.609	401.239	368.444	476.411	433.419	429.994	729.541	728.886	747.485	357.228	453.325	375.949	574.085	617.55	649.124
Rv2220	glnA1	4722.59	4620.74	4260.63	5958.33	5901.87	6078.55	2748.89	2711.47	2476.07	4942.56	4962.81	4898.71	7565.26	6949.32	7277.86	6602.1	6967.98	7019.65	6522.34	6152.26	5271.9	7634.91	7840.28	7723.16
Rv3617	ephA	694.176	664.911	669.77	600.638	613.27	574.232	386.731	445.33	423.52	533.735	506.601	531.842	1142.67	1147.36	1134.85	735.261	804.678	805.809	851.979	894.249	869.561	799.529	780.063	885.395
Rv2943	Rv2943	107.953	88.5801	113.809	247.842	245.854	233.385	100.264	84.4356	75.676	169.089	199.176	184.222	102.088	130.292	126.469	314.567	336.463	298.324	103.982	107.475	91.8349	276.566	302.925	284.354
Rv0287	esxG	20632.6	20681.8	20001.5	1697.59	1790.64	1764.23	11477.8	12450.2	11841.3	2239.33	2102.18	2036.06	30307.6	31897.5	34219.1	2053.27	2058.45	1931.39	37666.5	36511.2	32948.6	3214.04	3399.13	3365.83
Rv0950c	Rv0950c	163.979	156.977	142.588	1696.96	1660.88	1604.03	65.6488	83.0738	84.9695	1263.02	1288.87	1212.66	105.67	124.974	145.018	1928.71	2045.7	1846.92	95.5961	97.83	156.406	1971.16	1944.96	1968.93
Rv2542	Rv2542	131.183	148.007	138.663	192.204	182.342	182.62	121.749	126.653	139.403	197.761	148.661	170.606	162.983	184.801	210.781	264.363	237.295	209.162	218.026	187.393	256.851	279.919	262.621	266.116
Rv0334	rmlA	388.083	475.417	423.839	405.905	394.05	369.856	280.499	236.965	284.117	283.041	312.476	306.77	462.082	563.71	504.189	405.442	466.799	435.083	417.604	370.652	334.336	444.183	468.038	495.755
Rv3702c	egtC	356.654	333.016	320.495	273.132	292.976	303.928	331.825	326.848	318.636	249.223	275.672	242.693	401.188	442.725	487.326	373.032	377.547	353.296	449.469	436.79	401.778	373.784	421.884	398.759
Rv2419c	gpgP	445.475	472.053	465.699	467.233	458.928	481.274	365.246	298.248	323.946	416.107	371.651	382.862	677.004	727.239	713.284	637.395	598.55	557.764	696.007	708.234	647.149	601.742	643.552	573.683
Rv0705	rpsS	1626.12	1646.02	1631.26	5862.23	5918.26	5775.28	1150.64	1100.39	1083.36	4676.43	4812.7	4742.52	4602.91	3895.45	4095.9	7276.35	7599.82	7700.77	4461.15	4606.28	3380.67	7343.26	7006.27	7767.1
Rv3799c	accD4	27172.6	27541.7	28106.8	14101.1	14131.8	13703.1	29191	29951.5	28725	11816.4	11864.7	11514.7	34731.4	36033.6	36340.4	17279.6	16838.7	16144.3	41052.7	42343.8	39553.6	18086.6	18156.6	18417.5
Rv3458c	rpsD	3496.85	3360.44	3462.66	3737.87	3715.13	3939.85	3000.75	2693.77	2630.07	3361.94	3474.76	3480.2	6012.44	5724.85	5989.56	4599.03	4638.23	4614.96	6205.36	5485.37	5104.01	5327.68	5232.92	5459.93
Rv2483c	plsC	5717.39	5710.61	5152.78	2049.12	2026.25	2000.25	4029.64	3885.4	3990.91	1354.19	1372.58	1386.47	7106.76	6749.9	6738.26	3016.67	2967.25	2894.07	5121.94	5153.3	4791.2	2107.77	2107.47	2169.55
Rvnt28	argW	6.83244	6.7276	2.61629	9.48376	9.561	11.867	8.3553	1.36187	3.98295	1.47034	7.21653	3.20387	3.58203	3.98852	1.68625	2.54196	8.50012	5.36312	6.7085	11.0231	7.1746	8.3808	3.90032	7.46119
Rv1919c	Rv1919c	427.711	540.451	452.618	1169.66	1200.59	1209.78	340.18	364.98	317.308	721.939	839.283	787.35	847.151	826.952	895.399	1434.93	1528.61	1592.18	652.402	591.113	515.136	1241.2	1189.6	1211.2
Rv3119	moaE1	1221.64	1226.67	1118.46	941.421	943.808	869.589	866.564	852.528	837.746	730.025	782.994	804.971	1731.91	1584.77	1689.62	1035.85	1130.52	1074.64	1480.9	1481.23	1069.02	1159.06	1201.3	1232.75
Rv0878c	PPE13	97.0207	63.9122	74.5642	248.475	255.415	237.34	47.7446	42.2178	35.8465	227.168	256.187	237.086	171.938	233.993	153.449	345.706	360.547	325.139	120.753	122.632	147.797	377.974	357.529	383.008
Rv1283c	oppB	260.999	278.074	239.39	698.005	708.197	668.509	207.689	174.319	161.973	473.451	540.518	514.22	429.844	498.565	585.129	951.963	1022.14	901.675	335.425	344.472	243.936	760.139	820.366	787.57
Rv3007c	Rv3007c	836.291	886.922	864.684	310.435	308.001	350.077	637.39	555.641	609.391	296.274	310.311	303.566	1330.73	1197.88	1195.55	373.668	344.963	371.396	971.055	912.161	836.558	465.135	464.788	480.832
Rv0461	Rv0461	210.439	243.315	230.233	524.136	523.123	518.853	171.88	220.622	192.509	420.518	349.28	373.25	270.444	252.606	303.525	629.134	627.593	597.317	248.214	208.061	252.546	609.284	624.051	534.719
Rv0113	gmhA	251.434	237.709	200.146	185.882	198.732	198.443	95.4891	111.673	103.557	166.884	178.248	174.611	428.053	416.135	468.778	216.066	216.045	221.899	280.08	319.67	242.501	244.719	263.921	296.79
Rv3713	cobQ2	214.539	217.526	204.071	381.879	407.026	399.523	145.621	128.015	131.437	360.969	351.445	340.411	320.592	348.33	426.621	537.624	512.133	471.955	347.165	337.582	431.911	545.59	575.297	507.361
Rv2076c	Rv2076c	31.4292	35.8805	40.5525	58.7993	52.5855	51.4238	39.3893	27.2373	33.1912	34.5531	51.2374	57.6696	80.5958	74.4523	77.5675	71.8103	77.9178	80.4468	90.5647	62.0049	53.092	76.2653	72.1558	73.7829
Rv3823c	mmpL8	3291.87	3259.52	3255.97	3331.33	3198.16	3362.32	1203.16	1184.82	1143.11	2617.95	2801.46	2656	9558.66	8741.5	9158.03	3443.72	3412.09	3661	4558.43	4757.84	3812.58	4316.11	3971.82	4206.45
Rv0288	esxH	27022.3	27001.2	25244.6	2349.44	2371.81	2468.34	17957.9	17896.3	17311.2	2810.56	2680.22	2917.92	43174.3	42217.1	43820.6	2473.32	2642.83	2648.71	49668.1	48727.6	35752.5	4262.48	4320.25	4417.02
Rv2643	arsC	2571.73	2573.31	2648.99	1958.71	2025.57	1866.42	3022.23	2810.89	2818.6	2038.63	1882.07	1831.01	2851.3	2752.08	2792.43	2494.29	2309.91	2229.05	3743.34	3833.28	3304.62	2942.5	2862.18	3087.27
Rv3629c	Rv3629c	228.204	237.709	217.152	593.683	587.319	599.944	224.399	228.793	204.458	500.652	450.312	476.575	440.59	410.817	443.484	660.909	682.135	679.775	394.124	337.582	325.727	715.721	753.411	733.684
Rv0346c	ansP2	1464.88	1495.77	1431.11	3868.11	3952.79	3838.32	772.268	818.481	726.224	2714.25	2798.57	2720.88	2537.87	2191.02	2153.34	4274.93	4291.15	4462.12	1547.99	1368.24	1268.47	4340.42	4155.14	4211.43
Rv2261c	Rv2261c	367.586	343.108	395.06	210.539	228.781	207.673	202.914	196.109	227.028	188.204	178.248	171.407	598.2	588.971	647.52	223.057	251.462	234.636	561.837	551.155	553.879	292.49	276.272	261.971
Rv0740	Rv0740	755.668	728.823	752.183	540.574	551.124	544.564	473.865	501.166	468.66	413.166	438.765	374.051	1610.12	1530.26	1517.63	753.69	739.511	803.798	892.23	1083.02	691.631	634.427	610.399	644.978
Rv1678	Rv1678	791.197	815.161	809.742	846.584	892.588	857.722	740.041	719.065	657.186	760.167	847.221	759.316	1210.73	1167.31	1237.71	1137.53	1086.6	1031.06	1353.44	1331.04	1635.81	1251.25	1183.75	1209.54
Rv3241c	Rv3241c	11098.6	10851.6	11132.3	2168.62	2179.91	2263.3	10728.2	10117.3	10515	1953.35	2021.35	2193.05	11410.6	11796.7	12103.9	3070.68	3055.79	3048.93	12155.8	11695.5	11228.2	3141.12	3083.85	3259.71
Rv0216	Rv0216	278.764	238.83	252.472	261.752	269.074	232.066	188.591	196.109	193.837	222.022	183.3	205.848	444.172	376.25	377.72	270.718	308.13	306.368	402.51	363.762	304.203	314.28	294.474	332.437
Rv3798	Rv3798	1.36649	3.3638	1.30814	5.69026	6.82929	5.27423	4.77446	2.72373	0	3.67586	6.49488	9.6116	1.79102	2.65901	5.05875	8.89685	7.08344	8.04468	0	4.13366	0	11.7331	8.45068	10.7773
Rv3457c	rpoA	3515.98	3489.38	3528.07	6331.36	6446.85	6384.46	3731.24	3351.55	3341.69	5507.17	5121.57	5360.07	6779	6565.1	6321.75	7753.6	7980.2	7315.97	6695.08	6757.16	5913.3	8063.17	8156.21	8337.47
Rv1302	rfe	675.046	640.243	678.927	747.32	724.587	715.977	477.446	499.804	406.261	499.182	466.91	478.978	1128.34	1163.32	1003.32	975.476	976.098	899.663	801.666	793.663	683.022	750.92	722.208	747.777
Rv0886	fprB	1642.52	1644.9	1696.66	384.408	372.879	361.285	661.262	713.617	744.811	403.609	382.476	380.459	2922.94	3299.83	3396.11	491.869	490.882	438.435	3790.3	3831.9	5686.59	583.304	627.951	581.144
Rv0003	recF	390.816	390.201	361.048	636.676	661.075	661.257	415.378	475.291	430.158	477.126	498.662	478.177	634.02	474.633	536.228	754.325	809.637	819.217	583.639	639.339	367.339	733.32	705.957	795.031
Rv2633c	Rv2633c	1997.81	1864.67	1809.16	515.917	523.806	474.022	463.122	527.042	485.92	400.669	479.899	473.371	3137.86	2991.39	3168.46	596.089	624.051	618.77	1824.71	1383.4	1400.48	675.493	711.808	688.917
Rv0852	Rv0852	352.554	405.899	358.432	227.61	201.464	201.739	316.308	265.564	309.342	155.121	138.557	153.786	453.127	489.258	448.543	228.776	226.67	233.296	365.613	349.983	321.422	236.339	208.017	244.561
Rv1312	Rv1312	1217.54	1277.12	1228.35	1486.42	1481.27	1391.08	1114.84	1216.15	1206.83	807.954	865.984	824.194	1828.63	1607.37	1652.53	1877.87	2000.36	1980.33	1625.13	1569.41	1232.6	1240.36	1241.6	1347.16
Rv3787c	Rv3787c	61.492	67.276	62.7909	74.6056	92.1954	88.3434	50.1318	53.1127	47.7954	81.604	80.8252	93.7131	59.1036	85.0883	59.0188	98.5008	132.46	119.329	90.5647	85.429	117.663	136.607	116.359	140.934
Rv3689	Rv3689	1661.65	1713.3	1657.42	1265.77	1387.71	1307.35	1028.9	1050	1015.65	1088.79	1032.69	1053.27	2045.34	2429.01	2308.48	1732.34	1610.07	1480.22	1355.12	1446.78	1746.3	1535.36	1697.94	1625.71
Rv0171	mce1C	3746.91	3748.4	3738.68	6086.68	6300.7	6409.51	1612.57	1540.27	1642.3	5671.11	5800.65	5964.8	7959.28	7570.2	7520.68	7294.14	7473.73	7791.27	7166.35	7232.53	6922.05	9088.14	8648.95	8949.28
Rv0318c	Rv0318c	112.052	90.8226	98.1108	103.057	81.9515	93.6176	93.1019	68.0933	65.0548	69.1061	77.9385	79.2957	179.102	163.529	155.135	109.304	119.002	115.307	182.807	168.102	180.8	98.8935	128.06	117.721
Rv0728c	serA2	131.183	152.492	143.896	70.8121	57.366	71.2021	136.072	132.101	155.335	66.9006	64.2271	52.0628	182.684	190.119	180.429	71.1748	76.5011	52.2904	199.578	208.061	281.244	87.9984	110.509	81.2441
Rv2185c	TB16.3	1862.52	1736.84	1622.1	1195.59	1141.86	1153.08	858.209	949.22	816.504	982.924	1048.56	902.689	3019.65	2818.55	2967.8	1360.58	1544.19	1626.37	2604.57	2595.94	1875.44	1559.67	1458.72	1469.03
Rvnt25	asnT	10.9319	10.0914	3.92443	10.116	7.51222	15.1634	7.16169	5.44746	3.98295	10.2924	8.65984	8.81063	16.1192	17.2836	16.8625	10.1678	11.3335	22.7933	15.0941	11.0231	8.60952	12.5712	16.2513	14.0934
Rv2894c	xerC	381.25	403.656	435.612	1068.5	1163.03	1201.87	316.308	261.478	306.687	1194.65	1052.89	1036.45	472.828	615.561	586.815	2174.01	2011.7	1865.02	337.102	354.117	717.46	1646.83	1757.74	1620.74
Rv3801c	fadD32	34140.4	33584.2	34218.4	13195.7	12960.6	12685.2	40761.9	39864.5	39457.7	13319.1	13249.6	12668.1	32324.3	33353.3	33386.1	17022.8	16733.9	16443.3	40625	39085.1	42440.6	19937.9	19937.8	19823.6
Rv3846	sodA	895.05	901.499	911.777	1450.38	1486.74	1439.21	631.422	578.793	616.029	1260.08	1337.22	1382.47	1674.6	1664.54	1534.49	1688.49	1716.32	1653.18	1033.11	1229.08	964.266	2065.87	1950.16	2040.22
Rv3715c	recR	535.664	558.391	542.88	1248.06	1351.52	1358.11	298.404	332.295	330.585	1057.91	1056.5	1114.14	949.239	837.588	929.124	1577.28	1585.98	1664.58	734.581	665.519	645.714	1616.66	1642.68	1646.44
Rv1819c	bacA	483.737	506.813	474.857	620.238	538.831	563.024	288.855	275.097	245.615	491.83	533.302	515.822	829.241	836.259	856.615	655.825	663.01	658.993	602.088	552.533	529.485	802.043	782.013	758.554
Rv0047c	Rv0047c	2089.36	2101.25	2052.48	607.593	639.904	632.249	2245.19	2321.98	2183.98	453.601	483.508	459.755	1581.47	1600.72	1731.78	619.602	616.967	613.407	2866.21	2711.68	3126.69	736.673	700.757	684.771
Rv3923c	rnpA	362.12	339.744	346.658	682.199	701.368	661.916	293.629	298.248	266.857	608.722	580.209	545.458	677.004	660.764	676.186	858.546	932.18	839.999	888.876	1014.12	754.768	871.603	889.922	869.643
Rv3533c	PPE62	83.3558	111.005	95.4946	98.6311	109.952	125.922	157.557	178.404	159.318	83.8096	95.9799	80.8976	89.5508	83.7588	87.685	116.294	130.335	128.044	115.722	122.632	94.7047	138.283	130.011	128.498
Rv3921c	Rv3921c	1986.87	2076.59	1979.22	5863.49	6016.6	5870.88	1622.12	1646.49	1570.61	4516.16	4784.56	4367.67	4457.84	4077.59	4213.94	7021.52	7380.23	7073.96	4395.74	4341.72	4215.79	6935.95	6733.25	7055.8
Rv1923	lipD	2138.56	2255.99	2108.73	2503.71	2648.4	2577.12	2027.95	2080.93	1893.23	1848.22	1826.5	1788.56	2670.41	2385.13	2421.46	3413.21	3630.26	3655.64	2200.39	2256.98	1770.69	2719.57	2690.57	2872.56
Rv0760c	Rv0760c	438.643	466.447	419.914	653.747	773.075	731.8	381.957	414.007	430.158	517.561	443.095	394.876	599.991	650.128	677.873	849.649	869.846	868.825	736.258	784.018	460.609	710.692	638.352	709.642
Rv1524	Rv1524	174.911	191.737	155.669	416.653	460.977	464.132	207.689	162.062	221.717	444.044	393.301	412.498	232.832	244.629	281.604	679.338	636.093	674.412	226.412	264.554	226.717	642.808	623.4	627.569
Rv0078	Rv0078	79.2564	81.8525	74.5642	59.4316	64.8782	61.313	58.4871	68.0933	59.7442	59.5489	36.8043	40.8493	85.9688	91.7359	67.45	62.2779	63.7509	62.3463	80.502	89.5626	104.749	75.4272	63.7052	70.4668
Rv1284	canA	262.366	285.923	302.181	188.411	189.171	204.377	112.2	144.358	180.56	161.738	186.908	206.649	530.141	469.315	497.444	191.282	213.92	205.81	358.905	406.477	352.99	294.166	284.723	261.142
Rv1299	prfA	1884.39	1916.25	1826.17	3242.81	3220.01	3187.61	2470.78	2409.14	2404.37	2661.32	2556.82	2432.53	2611.3	2561.96	2445.06	4208.84	4093.52	4104.8	2960.13	2969.35	2885.62	3888.69	3791.76	3895.57
Rv3467	Rv3467	6.83244	4.48507	1.30814	2.529	5.46343	2.63712	4.77446	2.72373	2.6553	1.47034	3.60827	3.20387	5.37305	2.65901	3.3725	2.54196	3.54172	6.03351	1.67712	2.75577	0	5.02848	2.60021	5.80315
Rv0508	Rv0508	230.937	247.8	222.385	166.282	165.269	148.997	210.076	272.373	220.39	145.564	147.939	146.577	245.369	218.039	165.253	183.656	226.67	217.206	233.12	292.112	222.413	221.253	218.418	226.323
Rv1012	Rv1012	4.09947	10.0914	7.84887	24.0255	14.3415	19.1191	10.7425	5.44746	10.6212	24.9958	18.0413	14.4174	16.1192	13.2951	10.1175	18.4292	21.9587	22.1229	8.38562	12.401	12.9143	28.4947	28.6023	30.6738
Rv2954c	Rv2954c	951.076	1000.17	797.968	1897.38	1964.79	1856.53	672.005	680.933	678.429	1632.82	1620.83	1593.92	1880.57	1848.01	1745.27	2142.23	2248.99	2381.9	1631.84	1412.33	1091.97	2480.72	2398.04	2447.27
Rv3493c	Rv3493c	456.407	465.326	503.636	578.509	594.831	587.418	300.791	283.268	257.564	497.711	495.776	543.055	868.643	805.68	784.106	714.29	738.803	830.613	709.424	746.815	724.635	783.605	758.611	775.135
Rv0046c	ino1	14054.3	13697.4	13417.6	4249.36	4393.28	4217.41	12805.1	12990.8	12145.3	2934.07	3135.58	3147	10638.6	10900.6	11173.1	3840.9	3921.39	3649.6	17212.3	15457.1	14957.6	4737.67	4612.12	4543.04
Rv0534c	menA	86.0888	95.3077	122.966	130.876	132.488	131.856	74.0041	74.9026	69.0377	117.627	155.155	122.548	188.057	215.38	204.036	219.244	217.462	177.653	246.537	213.572	317.117	201.977	202.816	192.333
Rv0206c	mmpL3	38720.8	39476.4	39601.5	11495	11673.3	11608.6	35341.7	33958.1	33525.8	11333.4	11144.5	11103.8	65449.1	63311	63092.7	15152	15122.4	14934.3	59818	59683.2	57339.4	16739	16757.7	17088.6
Rv1234	Rv1234	1259.9	1317.49	1160.32	1201.28	1208.78	1196.59	1193.61	1171.2	1133.81	939.549	951.139	929.922	1319.98	1211.18	1180.38	1281.15	1349.39	1332.06	1118.64	1107.82	839.428	1341.77	1434.02	1472.34
Rv0733	adk	966.108	997.927	987.649	1740.59	1802.93	1905.98	946.536	971.01	928.027	1414.47	1680.01	1656.4	1131.92	1067.59	1077.51	2299.83	2367.28	2390.61	1603.33	1525.32	1145.07	2477.37	2298.59	2373.49
Rv0702	rplD	2372.22	2515	2637.22	6864.35	7120.22	6460.93	1390.56	1492.6	1413.95	5953.42	5780.44	5167.03	4946.79	5607.85	5713.02	9043.64	8821	8050.71	4977.71	4542.89	7134.42	8579.43	8704.85	8147.62
Rv3058c	Rv3058c	1501.77	1584.35	1522.68	1010.97	1042.15	994.852	1270.01	1331.9	1299.77	860.886	946.087	991.596	2450.11	2298.71	2185.38	1137.53	1162.39	1311.28	2329.53	2317.61	1799.39	1415.52	1407.36	1384.47
Rv3029c	fixA	2183.65	2067.62	1987.07	3998.99	3889.28	3956.99	2346.65	2260.7	2180	3678.06	3938.06	3787.77	3304.43	3525.85	3504.03	5275.83	5170.91	5298.09	3833.91	3684.47	3614.56	5765.99	5585.25	5783.25
Rv2140c	TB18.6	318.392	261.255	278.635	251.636	271.806	282.831	155.17	186.576	120.816	185.263	213.609	231.479	388.651	462.668	413.131	340.622	355.589	320.446	290.143	303.135	276.94	310.928	316.576	317.515
Rv1791	PE19	1673.95	1638.17	1523.99	1607.18	1570.05	1536.78	1114.84	1127.62	1016.98	1321.84	1494.54	1333.61	2713.39	2369.18	2463.61	1813.05	1799.19	1909.94	2098.08	2076.48	1865.4	2168.95	1933.26	2127.27
Rv3572	Rv3572	1770.97	1818.69	1690.12	735.308	689.075	752.897	1527.83	1370.04	1508.21	723.409	646.601	821.791	3096.67	2891.67	3016.7	883.33	811.054	847.373	2711.91	2631.76	2158.12	1120.51	1045.93	1118.35
Rv3275c	purE	379.884	383.473	400.292	408.434	413.172	363.263	316.308	305.058	294.738	396.257	336.29	285.945	374.323	400.181	376.034	510.933	567.383	487.374	449.469	447.813	598.362	524.638	495.99	508.19
Rv1908c	katG	33058.1	33305	32391	4194.35	4376.89	4407.28	26413.5	25793.7	25671.4	3091.4	2984.76	3090.93	21273.7	20620.6	21838.6	6395.56	6049.96	6610.72	21242.5	19885.7	17335.3	4659.73	4450.91	4617.65
Rv3354	Rv3354	1162.88	1095.48	1022.97	72.7088	77.8539	84.3877	532.352	498.443	535.043	102.924	117.629	109.732	1923.55	1983.62	1902.09	104.22	95.6264	78.4356	1459.1	1220.81	1404.79	163.426	169.014	161.659
Rv2032	acg	34462.9	34934.2	33950.3	1814.56	1542.05	1815.65	31815.8	31562.6	31347.1	1149.07	1029.8	1179.02	32537.4	31412.2	31475.6	2363.38	2212.16	2638.66	32702.3	32460.3	30285.4	1752.43	1593.28	1675.45
Rv3734c	tgs2	6917.17	6868.88	6761.8	2154.71	2178.54	2268.58	3750.34	4145.52	3820.97	1918.06	1817.84	1952.76	10674.5	10479.2	10257.5	2920.07	2924.04	2926.92	5886.71	5759.57	5019.35	2805.89	2834.88	2859.29
Rv2945c	lppX	299.261	283.681	264.245	1213.92	1212.2	1219.01	224.399	257.392	228.356	1412.26	1453.41	1442.54	569.543	481.281	553.09	1347.24	1465.56	1506.37	529.971	460.214	364.47	2097.71	2136.72	2205.2
Rv1508c	Rv1508c	1145.12	1082.02	1110.61	1486.42	1461.47	1526.89	1065.9	1116.73	1054.15	1232.88	1208.77	1335.21	1210.73	1118.11	1117.98	1799.07	1884.19	1905.92	1442.33	1397.18	1262.73	1901.6	1843.55	1892.66
Rv3459c	rpsK	1803.77	1644.9	1813.09	1716.56	1655.42	1615.89	1586.31	1393.19	1384.74	1617.38	1641.76	1550.67	2702.64	2944.85	3072.35	2212.14	2220.66	1877.76	3055.72	2936.28	3669.09	2324	2446.8	2404.16
Rv2442c	rplU	788.464	759.098	707.706	1143.74	1248.39	1220.33	378.376	362.256	338.55	837.36	961.242	893.878	1402.37	1366.73	1377.67	1451.46	1410.31	1519.77	1256.17	1158.8	862.387	1348.47	1316.36	1350.48
Rv1567c	Rv1567c	129.816	145.765	122.966	154.269	158.439	189.872	116.974	108.949	107.54	134.536	145.774	145.776	232.832	241.97	178.743	165.863	172.128	169.609	145.91	150.19	139.187	202.815	208.017	224.665
Rv0405	pks6	445.475	422.718	438.228	1160.81	1118.64	1156.38	370.02	424.902	415.554	908.672	982.892	938.732	737.899	682.036	600.305	1387.91	1486.11	1510.39	546.743	569.067	482.133	1398.76	1345.61	1475.66
Rv3616c	espA	24998.5	24752	24802.4	9048.77	8908.81	9049.26	12345.6	12365.7	12244.9	6370.26	6352.71	6356.47	37161.8	38954.5	38530.8	11618.6	11954	11882	23246.6	24965.9	22667.4	9457.74	9309.4	9643.17
Rv1643	rplT	3250.88	3250.55	3266.44	4760.22	4925.97	4727.03	3533.1	3166.34	3357.62	3926.55	3933.01	3851.05	4547.39	4663.91	4623.7	6298.97	6040.76	5849.15	4387.36	4184.64	4069.43	5697.27	5726.31	6015.38
Rv0761c	adhB	1996.44	1861.3	1865.41	2542.28	2712.59	2666.78	1520.66	1579.76	1558.66	1901.15	1882.07	1863.85	2636.38	2647.05	2716.55	3282.3	3409.26	3229.27	2557.62	2558.74	2192.56	2815.95	2848.53	2739.91
Rv1850	ureC	599.889	585.301	546.804	873.138	832.49	879.478	547.869	514.785	531.06	702.824	662.478	707.253	839.987	935.972	895.399	1197.9	1224.73	1155.08	774.832	728.902	812.165	1007.37	1024.48	1046.22
Rv3919c	gid	631.318	514.661	571.659	2074.41	2031.71	2080.68	658.875	607.392	589.476	1522.54	1610.73	1480.19	1144.46	1103.49	1112.93	2573.1	2603.16	2512.62	1366.86	1285.57	1100.58	2241.86	2266.73	2345.3
Rv0682	rpsL	465.973	507.934	469.624	1191.79	1335.13	1264.5	466.703	525.68	481.937	1106.43	1050.01	884.267	857.897	889.439	930.81	1604.61	1677.36	1814.75	1064.97	1218.05	690.196	1547.93	1447.67	1527.06
Rv0503c	cmaA2	1341.89	1304.03	1121.08	1827.84	1882.83	1798.51	1042.03	1123.54	1107.26	1782.06	1777.43	1879.87	2412.5	2047.44	1804.29	1881.05	2036.49	2159.33	1779.43	1864.28	1427.75	2689.4	2672.37	2715.04
Rv0035	fadD34	110.686	108.763	112.5	175.766	173.464	147.019	68.036	70.817	63.7272	169.825	192.681	154.586	218.504	216.709	241.134	204.627	186.294	184.357	132.493	115.742	126.273	273.214	237.269	260.313
Rv3495c	lprN	1544.13	1439.71	1486.05	1134.89	1152.78	1143.19	1144.68	1002.33	1072.74	1002.77	949.696	1034.05	2575.48	2474.21	2586.71	1447.64	1531.44	1578.77	2109.82	2233.55	1929.97	1449.04	1434.67	1541.98
Rv1926c	mpt63	2368.13	2248.14	2201.61	1055.23	1029.86	1064.08	1043.22	992.8	922.716	890.293	913.613	953.951	3463.83	3625.56	3814.3	1059.36	1142.56	1072.62	3409.59	3032.73	2551.29	1346.79	1389.16	1347.16
Rv2187	fadD15	7107.11	6935.04	6801.04	2258.4	2255.03	2240.89	4539.32	4641.24	4476.83	2184.19	2205.37	2141.78	9127.02	9234.74	9313.16	2514.63	2660.54	2564.24	8531.53	8334.84	8072.86	3308.74	3232.71	3124.58
Rv2690c	Rv2690c	1232.57	1173.97	1153.78	658.173	655.612	630.93	676.779	664.59	645.237	514.62	572.271	481.381	1524.16	1586.1	1539.55	840.116	925.097	837.987	1172.31	1103.69	951.352	729.13	776.163	817.415
Rv3760	Rv3760	1190.21	1169.48	1153.78	1506.65	1585.76	1454.37	621.873	645.524	554.957	1072.62	1142.38	1239.09	1516.99	1441.18	1424.88	1483.23	1620.69	1509.72	910.679	797.796	794.946	1783.43	1599.78	1722.71
Rv3825c	pks2	17242.4	17445.8	16918.2	5131.98	5144.5	4971.62	6673.5	6746.68	6331.56	4680.84	4625.08	4426.14	37323	37327.2	38158.2	5494.44	5634.87	5386.58	22537.2	23738.2	20855.1	6648.49	6788.5	6851.03
Rv3648c	cspA	24968.5	25006.5	23852.7	40952.1	40358.4	40922.8	16621.1	16814.9	16781.5	30963.2	33969.7	34357.4	49444.6	45193.9	44291.1	44800.7	47221	49073.9	35888.8	34254.3	33205.5	48743.6	47760.7	50169
Rv1826	gcvH	869.087	819.646	817.59	1409.92	1400.69	1386.46	709.007	823.928	767.381	1152.01	1223.92	1241.5	1225.06	1116.78	1107.87	1639.56	1700.02	1718.88	1083.42	1092.66	957.092	1738.18	1779.84	1823.85
Rv3048c	nrdF2	2655.09	2809.89	2700.01	768.185	827.027	783.883	1826.23	1773.15	1814.9	870.443	837.839	828.199	3626.81	3080.46	3141.48	740.345	871.263	898.323	4224.68	4416.13	2624.47	1228.63	1235.1	1284.98
Rv2485c	lipQ	183.11	160.341	154.361	1508.55	1568	1514.36	91.9083	95.3306	82.3142	981.454	967.015	935.529	248.951	237.981	227.644	2017.68	2040.03	1916.65	221.38	260.421	266.895	1456.58	1400.21	1401.05
Rv0163	Rv0163	117.518	128.946	98.1108	191.572	180.976	201.08	102.651	72.1788	84.9695	132.331	121.959	137.766	179.102	194.108	225.958	201.45	236.587	250.055	149.264	132.277	120.533	194.435	193.066	190.675
Rv2943A	Rv2943A	16.3979	13.4552	18.314	31.6125	21.8537	16.482	8.3553	13.6187	10.6212	18.3793	20.9279	26.4319	17.9102	11.9655	10.1175	31.139	26.2087	34.1899	10.0627	12.401	10.0444	31.009	35.7529	29.8448
Rv0644c	mmaA2	509.7	455.234	414.682	695.476	656.295	686.309	337.793	333.657	391.656	637.394	664.643	599.123	558.797	477.292	618.854	766.4	765.72	801.786	741.289	741.303	571.098	946.193	945.177	908.607
Rv1881c	lppE	744.736	857.769	769.189	602.535	598.929	624.997	694.684	701.36	617.357	621.22	591.034	641.574	1275.2	1184.59	1153.4	757.503	806.095	837.317	1111.93	957.631	858.082	885.013	909.424	933.478
Rv3656c	Rv3656c	35.5287	29.1529	48.4014	44.2576	45.0733	32.3047	29.8404	42.2178	38.5018	35.2882	25.2579	31.2377	64.4766	26.5901	62.3913	54.0166	50.2924	46.9273	38.5739	27.5577	30.1333	46.0944	44.8536	44.7671
Rv0446c	Rv0446c	162.612	181.645	171.367	472.924	441.855	477.318	179.042	181.128	146.041	373.467	311.033	339.61	299.1	235.322	241.134	622.144	611.301	588.602	184.484	161.213	172.19	486.087	514.842	504.045
Rv0924c	mntH	84.7223	86.3375	74.5642	261.752	287.513	255.141	70.4232	95.3306	88.9525	253.634	208.558	237.086	130.744	122.314	134.9	313.932	334.338	324.469	115.722	107.475	97.5746	330.204	344.528	353.163
Rv3711c	dnaQ	1467.61	1509.23	1461.2	3687.92	3892.69	3906.89	1420.4	1385.02	1336.94	3267.1	3095.17	3282.36	1178.49	1301.59	1134.85	4349.92	4039.68	3925.13	1532.89	1585.95	1642.98	4727.61	4790.24	4658.27
Rv1479	moxR1	8127.88	8040.6	7970.53	5505.64	5541.28	5553.11	10038.3	9635.2	9316.11	4903.59	5050.85	4973.2	9866.71	9169.6	8957.36	7634.13	7312.23	7696.08	9680.36	10342.4	8501.9	7417.85	7179.83	7345.96
Rv2156c	murX	4063.94	4176.72	4138.97	1694.43	1682.74	1726.65	3305.12	3292.99	3400.11	1439.47	1343	1407.3	4982.61	5097.32	5210.51	2031.66	2086.78	1962.23	4149.21	4175	4115.35	2044.08	2046.37	2062.6
Rv1679	fadE16	944.244	935.137	855.527	940.789	861.856	872.885	697.071	694.551	711.62	865.297	767.117	773.733	1330.73	1455.81	1382.73	1106.39	1118.47	946.591	1428.91	1565.28	1829.52	1113.81	1229.9	1186.33
Rv3350c	PPE56	971.574	974.381	892.155	869.345	859.807	808.276	1031.28	1025.48	993.081	772.665	824.128	829.801	1158.79	1280.31	1266.37	1127.36	1150.35	1116.2	1276.29	1362.73	1189.55	1185.05	1167.49	1207.05
Rv3206c	moeB1	6744.99	6854.3	6645.37	2472.1	2444.2	2539.54	7896.95	8259.71	7619.38	1965.85	1905.89	1939.94	4687.09	4372.74	4670.91	2699.56	2735.62	3014.74	4867.02	5012.75	4362.16	2831.87	2738.02	2956.29
Rv3196A	Rv3196A	125.717	116.612	137.355	123.289	109.952	127.241	58.4871	66.7314	46.4677	101.454	115.465	94.514	154.027	171.506	158.508	113.753	136.002	140.782	201.255	221.84	124.838	147.502	156.663	153.369
Rv1258c	Rv1258c	107.953	107.642	117.733	191.572	175.513	199.102	100.264	80.35	98.246	143.358	144.331	134.562	125.371	142.257	124.783	198.908	197.628	211.173	117.399	124.01	150.667	194.435	212.567	211.4
Rv3002c	ilvN	851.323	808.433	901.312	1047.64	1106.34	1068.69	866.564	864.784	788.623	849.858	947.531	850.626	1108.64	1026.38	1018.5	1382.19	1289.19	1411.84	1309.83	1212.54	958.526	1283.1	1238.35	1358.77
Rv0286	PPE4	32799.8	32091.8	30478.5	3626.59	3772.5	3705.81	25038.4	24054.6	23875.1	4463.96	4637.34	4474.2	48033.3	46547.3	49324.5	4096.36	4151.6	4039.77	54665.9	53331.1	53590	6723.08	6332.16	6816.21
Rv2641	cadI	52835.3	53869	52510.2	25524	25844.8	26040.9	48747.2	47446	46694.7	26967.6	25635.3	28209.2	58464.2	55092	55867.2	26908.5	26910.7	27442.4	85758.1	81351.8	66268.9	39782.8	38953.1	39477.2
Rv0231	fadE4	1151.95	1099.96	1073.99	753.643	771.027	846.514	440.444	439.882	428.831	718.263	731.035	712.86	1860.87	1830.73	1870.05	897.311	918.013	889.608	1283	1233.21	1066.15	1072.74	1067.39	1021.35
Rv3633	Rv3633	11762.7	12013.3	11592.8	3134.7	3220.69	3111.8	5463.17	5466.53	5321.22	3418.55	3404.76	3435.34	18463.6	18038.7	18287.4	3388.43	3432.63	3221.22	15946.1	15735.5	15197.2	5131.57	5002.8	4857.23
Rv1613	trpA	297.895	279.195	296.949	2577.69	2541.86	2528.99	284.08	344.552	327.929	1943.06	1898.67	1673.22	551.633	529.143	504.189	3407.49	3456.72	3281.56	387.416	439.546	421.866	2639.11	2695.12	2727.48
Rv3057c	Rv3057c	955.176	963.168	846.37	911.706	892.588	870.248	785.398	813.033	803.228	824.127	820.52	801.767	1599.38	1692.46	1743.58	1042.2	1116.35	1077.99	1496	1470.21	1324.43	1206	1179.85	1188.82
Rv2446c	Rv2446c	128.45	132.309	132.123	234.565	251.318	253.163	173.074	133.463	126.127	222.757	180.413	190.63	182.684	150.234	163.566	308.848	327.963	351.284	120.753	162.591	121.968	263.157	308.775	293.473
Rv2254c	Rv2254c	20.4973	22.4253	31.3955	49.9478	35.5123	46.8088	66.8424	74.9026	80.9866	36.7586	33.196	37.6454	19.7012	33.2376	30.3525	61.0069	72.9594	63.687	40.251	37.2029	28.6984	42.7421	55.2545	58.8605
Rv3513c	fadD18	66.958	44.8507	36.6281	7.58701	5.46343	4.61495	56.0999	46.3034	59.7442	4.41103	5.05157	6.40773	21.4922	21.2721	43.8425	5.08391	5.66675	8.71507	36.8967	45.4703	64.5714	4.1904	13.0011	5.80315
Rv0142	Rv0142	1918.55	1924.09	2038.09	491.891	552.489	526.764	1284.33	1194.36	1277.2	485.213	379.59	492.594	2570.11	2830.52	2699.69	587.192	643.884	573.854	1786.14	1749.92	2607.25	650.35	659.803	667.362
Rv3232c	ppk2	629.951	722.096	647.532	1022.35	973.174	964.525	428.508	404.474	414.226	747.67	721.653	773.733	1300.28	1167.31	1212.41	1193.45	1237.48	1256.31	865.396	874.958	650.019	1064.36	1094.69	1105.91
Rvnt44	serT	15.0314	15.6977	22.2385	19.5998	16.3903	19.1191	15.517	9.53306	19.9147	21.32	14.4331	13.6164	34.0293	25.2606	33.725	24.7841	33.2922	30.1675	25.1569	38.5808	20.0889	25.1424	22.1018	25.6997
Rv3497c	mce4C	1791.47	1840	1815.7	1095.69	1165.76	1222.3	1291.49	1280.15	1396.69	978.513	967.737	925.917	2733.09	2530.05	2588.39	1492.13	1493.9	1464.8	2363.07	2325.87	2261.43	1413.84	1350.81	1418.46
Rv3031	Rv3031	904.616	969.896	968.027	847.216	879.612	876.841	941.762	842.994	981.133	941.755	806.087	853.83	1069.24	1154.01	1119.67	1129.26	1069.6	984.133	1547.99	1581.81	1665.94	1237.01	1244.85	1301.56
Rv0743c	Rv0743c	306.094	297.136	311.338	158.695	192.586	166.138	259.014	276.459	280.134	141.888	154.434	174.611	428.053	401.511	372.661	186.198	185.586	197.765	340.456	388.564	304.203	243.043	221.018	220.52
Rv3347c	PPE55	3384.79	3323.43	3381.55	2030.79	2019.42	1994.32	3509.23	3603.49	3502.34	1618.11	1630.21	1678.83	4087.1	4011.12	4026.77	2704.64	2698.08	2714.41	2976.9	3163.63	2458.02	2373.44	2394.14	2382.61
Rv3486	Rv3486	110.686	103.157	87.6457	85.3538	101.756	112.737	223.206	193.385	233.666	108.805	124.846	112.936	73.4317	94.3949	97.8025	81.9781	102.001	82.458	142.556	176.37	153.536	191.082	150.812	163.317
Rv3614c	espD	13525.5	13537.1	12950.6	4035.66	4269.67	4185.1	6428.81	6679.95	6927.67	3205.35	3066.3	3059.69	19559.7	18210.2	18666.8	4789.05	5043.41	5208.93	12107.2	12844.7	9681.4	4675.65	4293.6	4553.81
Rv0673	echA4	1221.64	1291.7	1249.28	532.355	570.928	541.268	1064.7	1088.13	1031.58	585.197	533.302	515.021	2240.56	2273.45	2325.34	723.187	623.342	709.273	1938.76	2047.54	2145.21	729.968	790.464	847.26
Rv2504c	scoA	1094.56	1198.63	1130.24	379.983	410.44	397.545	1512.31	1553.89	1396.69	375.673	371.651	398.881	1311.02	1360.08	1273.12	513.475	492.299	469.943	1232.69	1198.76	1124.98	572.409	530.443	558.76
Rvnt20	leuV	62.8585	29.1529	44.4769	44.2576	40.2928	44.1717	1.19361	0	2.6553	1.47034	0.721653	0.800966	57.3125	31.9081	40.47	24.1486	43.209	54.972	1.67712	2.75577	0	0.83808	1.95016	2.48706
Rv1793	esxN	7200.03	6797.12	6716.01	3408.46	3546.45	3461.87	3673.94	3873.14	3498.36	2909.81	3134.86	2889.09	10746.1	9948.69	9965.74	3751.93	4096.35	3917.09	8125.67	7782.3	7279.35	4302.7	4186.99	4442.72
Rv2782c	pepR	1725.88	1852.33	1826.17	3691.08	3895.43	3709.1	1772.52	1705.06	1636.99	3390.61	3196.2	3127.77	1868.03	2011.54	2087.58	5150.64	4889.7	4684.01	2720.3	2889.43	3422.28	4729.29	4608.22	4720.45
Rv0668	rpoC	12272.4	12345.1	12236.4	46350.3	47807.7	45972.8	11634.2	11070.6	11034.1	39058.2	38135.8	37016.7	21429.5	21046.1	21084.9	61765.1	60737.6	59078.1	21068	21642.5	21780.6	54419.9	54594.7	56124.7
Rv0703	rplW	1837.93	1624.72	1798.7	5208.48	5286.55	4958.44	1057.54	1097.66	1119.21	4489.69	4884.15	4473.4	3861.43	3835.62	3740.1	6483.89	6567.05	6221.89	4063.67	3689.98	3636.09	6664.41	6564.88	6780.56
Rv3133c	devR	36019.3	36260.6	35411.5	1091.26	1130.93	1193.3	43059.6	42618.2	40981.9	943.225	910.005	922.713	24171.6	23798.1	24717.1	1582.37	1356.48	1645.14	33460.3	33179.5	27085.5	1376.13	1294.25	1343.01
Rv1699	pyrG	1956.81	1921.85	1841.87	4270.85	4197.96	4309.71	2230.87	2129.96	1950.32	3497.95	3522.39	3591.53	2116.98	1961.02	1864.99	5570.7	5508.08	5638.65	1927.02	1966.24	1688.9	5109.78	4984.6	5234.44
Rv2864c	Rv2864c	250.067	211.919	204.071	1681.15	1774.93	1724.01	255.433	251.945	258.892	1542.39	1558.77	1609.94	105.67	110.349	85.9988	2007.51	1905.44	1836.2	135.847	117.12	124.838	2227.62	2268.68	2301.36
Rv1812c	Rv1812c	11635.7	11715	11959.1	475.453	489.66	482.592	16757.2	16405	16946.1	380.084	369.486	348.42	7873.31	8616.52	8581.33	688.235	632.551	625.474	6886.27	6941.79	8837.67	524.638	549.945	510.677
Rv3789	Rv3789	57.3925	60.5484	48.4014	85.9861	94.2442	76.4764	25.0659	40.856	42.4848	71.3116	102.475	96.9169	103.879	107.69	112.979	112.482	99.8765	130.726	72.1164	95.0742	84.6603	132.417	134.561	123.524
Rvnt43	argU	4.09947	10.0914	6.54072	19.5998	15.0244	11.2077	3.58084	8.17119	5.3106	11.0276	8.65984	8.81063	10.7461	14.6246	8.43125	22.2421	18.4169	14.0782	6.7085	4.13366	4.30476	10.895	15.6013	14.9224
Rv2219A	Rv2219A	319.758	315.076	329.652	259.223	280.001	261.734	358.084	409.921	338.55	221.287	184.743	203.445	351.039	376.25	435.053	331.09	291.838	296.312	290.143	297.624	268.33	281.595	293.174	304.251
Rv0917	betP	304.727	356.563	320.495	372.396	323.708	347.44	335.406	292.801	305.359	284.511	296.599	345.216	422.68	461.338	436.739	407.348	420.756	466.591	486.366	465.726	378.819	453.401	418.634	464.252
Rv2441c	rpmA	811.694	807.312	784.887	1030.57	1032.59	1071.33	447.605	408.56	378.38	741.053	979.283	716.865	1065.66	1324.19	1345.63	1234.76	1259.44	1308.6	1184.05	1088.53	845.168	1226.11	1127.84	1163.95
Rv0085	hycP	884.118	974.381	968.027	107.483	94.9271	89.6619	985.925	1013.23	1005.03	75.7227	70.0004	70.485	1336.1	1723.04	1655.9	111.211	108.377	89.1619	1427.23	1426.11	2031.85	96.3792	111.809	103.628
Rv1297	rho	17657.8	17608.4	17419.3	33147.6	34131.4	33768.9	14911.8	13588.7	13333.6	26751.4	28141.6	27119.9	30812.7	28858.2	28617.4	40267.8	39617.7	39380.7	28422.2	25889.1	26398.2	39456	38617.7	40051.7
Rv3887c	eccD2	635.417	622.303	646.223	367.338	378.343	358.648	581.29	529.766	690.377	331.562	303.816	297.959	757.6	711.285	753.754	485.514	477.424	492.066	805.02	675.165	622.755	462.62	427.735	456.791
Rv3278c	Rv3278c	120.251	125.582	104.652	110.012	120.878	112.737	71.6169	57.1983	92.9354	89.6909	71.4437	84.9024	161.192	146.246	143.331	117.565	123.96	111.955	127.461	115.742	78.9206	113.141	117.009	124.353
Rv1072	Rv1072	45377	44994.2	43061.5	20092.9	20489.2	20044.7	46311	49693.1	45186.5	17578	15508.3	16176.3	43871	40649.6	39276.1	23073.3	24235.3	24461.9	43036.7	45925	35101	23570.2	22840.2	24515
Rv2987c	leuD	226.837	262.376	222.385	1473.78	1414.35	1353.5	506.092	622.372	566.906	1229.21	1138.05	1130.16	358.203	279.196	301.839	1083.51	1145.39	1278.43	251.569	259.043	177.93	1723.09	1569.23	1744.26
Rv0655	mkl	6460.76	6577.35	6734.33	14478.5	14178.3	14397.3	6851.35	6901.93	6279.78	11950.2	11763.7	11977.6	10004.6	9216.13	8771.87	16182.1	16242.3	16726.9	9720.62	10522.9	9309.76	16976.2	16770.1	17584.4
Rv0637	hadC	937.411	967.653	961.486	2443.02	2447.62	2516.47	824.787	830.738	710.292	1972.47	2081.25	2075.3	1570.72	1332.16	1359.12	2788.53	2959.46	3044.91	1272.94	1220.81	944.177	2872.94	2927.84	3014.32
Rv1769	Rv1769	982.506	1096.6	1036.05	1889.8	1854.15	1907.95	1057.54	1037.74	1132.48	1526.95	1568.87	1532.25	1189.24	1264.36	1227.59	2604.23	2603.87	2593.07	1267.91	1251.12	1091.97	2193.26	2225.13	2234.21
Rv3312A	Rv3312A	39.6282	31.3955	40.5525	20.8643	20.4879	21.7562	5.96807	6.80933	13.2765	18.3793	20.2063	19.2232	50.1485	94.3949	82.6263	43.2133	29.0421	30.1675	25.1569	20.6683	20.0889	30.1709	22.7518	31.5028
Rv2632c	Rv2632c	1400.65	1216.57	1308.14	702.431	736.197	732.459	679.167	693.189	641.254	666.065	754.849	696.04	2494.89	2242.88	2094.32	752.419	774.22	829.943	1740.86	1610.75	1488.01	990.611	1035.53	1014.72
Rv3152	nuoH	1198.41	1168.36	1284.6	5350.74	5500.31	5332.91	1278.36	1303.3	1258.61	4010.36	3708.58	3882.28	1388.04	1239.1	1183.75	6804.82	6855.35	6860.77	1106.9	1168.45	965.701	5507.03	5359.68	5796.52
Rv3888c	Rv3888c	696.909	703.034	753.491	421.711	419.318	417.324	658.875	596.497	573.544	381.554	421.445	399.682	685.96	760.477	731.833	549.698	547.55	557.094	662.464	660.008	588.317	555.647	581.797	589.434
Rv3312c	Rv3312c	265.099	251.164	282.559	228.875	216.488	222.177	149.202	167.509	205.786	142.623	133.506	149.781	291.936	331.047	274.859	247.205	246.504	235.977	187.838	195.66	157.841	204.492	207.367	198.965
Rv3600c	Rv3600c	347.088	372.261	359.74	1152.59	1210.83	1137.92	309.146	299.61	297.393	1094.67	920.108	981.184	895.508	942.619	944.3	1378.38	1386.23	1261.67	585.317	598.003	552.444	1445.69	1403.46	1454.1
Rv2198c	mmpS3	1177.91	1328.7	1251.89	1348.59	1389.08	1490.63	1307.01	1148.05	1204.18	1113.78	1203.72	1143.78	2315.78	2010.21	1966.17	2245.82	1999.65	2192.18	1828.07	1955.22	2057.68	1704.66	1631.63	1630.68
Rv0241c	htdX	3045.9	3272.98	3193.18	2731.32	2841.67	2753.81	2949.42	3058.75	2985.88	2456.94	2289.08	2401.3	4961.12	5037.5	5107.65	3764	3673.47	3739.44	3936.21	3819.5	3914.46	3353.16	3312.02	3585.52
Rv0569	Rv0569	10241.8	9825.66	9781	709.385	659.026	715.977	7569.9	7335.01	7449.44	519.766	521.755	560.676	10321.6	10154.8	10869.6	917.011	897.472	1093.41	9982.25	10273.5	7220.52	737.511	759.912	800.834
Rv3762c	Rv3762c	1631.59	1685.26	1497.83	807.384	859.124	816.187	872.532	887.936	796.589	718.263	713.715	728.879	2939.06	3028.61	2930.7	937.346	1015.06	880.892	2114.85	2017.23	2059.11	1032.51	1023.83	1038.76
Rv2028c	Rv2028c	13824.8	14277.1	14379.1	128.347	111.317	108.781	13332.7	13039.9	13690.7	87.4854	70.722	74.4899	15169.9	17307.5	17147.5	193.824	156.544	189.05	16714.2	17587.3	21718.9	99.7315	117.009	116.892
Rv0381c	Rv0381c	813.061	871.224	860.759	358.486	398.83	351.396	1079.03	1062.25	1031.58	377.878	355.775	362.037	721.78	813.657	866.733	481.701	450.507	437.765	927.45	829.488	1069.02	496.143	538.894	532.232
Rv2881c	cdsA	1511.34	1566.41	1540.99	2429.11	2501.57	2314.07	1665.09	1722.76	1647.61	2136.41	1799.08	1914.31	1936.09	1745.64	1797.54	3218.12	3244.21	3238.65	1833.1	1694.8	1617.15	2846.12	2721.77	2794.63
Rv3898c	Rv3898c	631.318	654.82	597.822	652.483	683.612	718.614	578.903	570.621	614.701	586.667	637.22	583.103	929.538	825.623	804.341	829.313	837.971	850.725	825.145	894.249	728.939	852.328	811.916	922.7
Rv2682c	dxs1	7152.2	6922.7	7220.96	3900.35	3816.21	3769.76	6383.45	6339.48	6405.91	3601.61	3639.3	3443.35	8301.36	9044.63	9178.26	4709.61	4323.02	4397.76	9871.56	9565.29	11320.1	5107.26	5030.76	5118.38
Rv2256a	Rv2256a	230.937	228.738	232.85	235.83	256.098	244.593	478.639	486.186	462.022	254.369	228.042	213.858	359.994	343.012	293.408	343.8	333.63	359.999	365.613	381.675	249.676	340.261	321.776	333.266
Rv3756c	proZ	452.308	419.354	447.385	564.6	620.099	574.891	583.677	597.859	497.868	476.391	421.445	473.371	471.037	457.35	499.13	712.383	716.844	707.932	504.815	482.26	396.038	641.131	669.554	642.491
Rv3804c	fbpA	10374.4	10329.1	10074	8447.5	8898.56	8813.24	7085.29	6999.99	7068.4	6964.28	7262.72	6717.7	20790.1	22096.4	22841.9	11492.2	11344.1	11635.3	15297.1	14886.7	13263	10015.1	9975.71	9871.98
Rv0683	rpsG	821.26	745.642	727.328	1466.19	1462.15	1534.14	442.831	480.738	466.005	1310.81	1208.77	1238.29	1316.4	1204.53	1217.47	1713.91	1736.86	1889.83	1014.66	1018.26	944.177	1728.12	1852.65	1770.79
Rv2174	mptA	986.605	975.502	998.114	852.274	865.954	832.669	858.209	960.115	827.125	838.831	745.468	797.762	1210.73	1237.77	1236.02	1011.06	1010.81	914.412	1155.54	1122.98	1180.94	1154.04	1101.84	1139.07
Rv3511	PE_PGRS55	176.277	127.824	126.89	125.186	120.878	105.485	51.3254	43.5797	49.123	119.098	127.011	108.13	218.504	269.89	247.879	129.64	123.252	130.726	221.38	214.95	401.778	157.559	188.515	159.172
Rv3049c	Rv3049c	4990.42	4978.42	4999.73	4255.68	4202.06	4297.18	3293.18	3433.26	3126.61	3619.25	3467.54	3353.65	16909	16005.9	15764.8	4944.74	5090.16	5119.1	12392.3	12553.9	10853.7	4902.77	4865.64	5095.99
Rv1172c	PE12	782.998	681.73	722.096	1289.79	1366.54	1249.33	833.143	776.263	736.845	1005.71	1086.81	1091.72	891.926	842.906	871.791	1569.02	1610.07	1625.7	1016.34	1094.04	997.269	1461.61	1487.97	1581.77
Rv0034	Rv0034	15.0314	17.9403	34.0118	30.348	33.4635	27.0304	16.7106	16.3424	25.2253	22.7903	33.196	28.0338	32.2383	38.5557	38.7838	33.6809	26.9171	28.1564	21.8026	19.2904	14.3492	32.6851	46.8038	39.793
Rv3515c	fadD19	813.061	903.741	873.841	132.773	176.196	152.293	1244.94	1265.17	1137.8	165.414	186.908	198.64	424.471	397.522	453.601	168.405	171.419	160.223	694.33	757.838	707.415	262.319	256.771	264.458
Rv1431	Rv1431	789.831	860.012	826.747	457.75	478.733	485.229	800.915	742.216	755.432	394.787	399.074	400.483	906.255	951.926	866.733	538.895	555.341	577.206	890.553	914.917	815.034	561.514	550.595	586.947
Rv2986c	hupB	13848	13513.5	13290.7	13873.5	13887.4	13320.1	14484.5	14172.9	14021.3	13264.7	15859	14986.9	18094.6	19497.2	19504.9	13843.5	14418.3	14208.9	20543.1	19661.1	23006.1	21019.1	20558.6	21061.3
Rv1164	narI	2659.19	2609.19	2464.54	934.467	947.222	961.229	3095.04	2952.52	2922.16	897.645	764.952	922.713	2593.39	2383.8	2384.36	1117.83	1182.23	1226.81	2976.9	3221.5	2546.98	1169.96	1190.9	1309.85
Rv3461c	rpmJ	2400.92	2375.96	2323.26	1902.44	1891.71	1977.84	2202.22	2063.23	2040.6	1614.44	2057.43	1914.31	3062.64	2720.17	2794.12	2344.32	2321.95	2461.67	3411.27	3034.11	2423.58	2648.33	2573.56	2712.56
Rv2297	Rv2297	266.465	229.86	227.617	326.874	346.928	315.795	199.334	187.937	240.304	268.338	278.558	306.77	492.53	462.668	468.778	474.71	468.215	455.865	368.967	378.919	337.206	437.478	354.279	423.63
Rv3597c	lsr2	2246.51	2074.34	2062.94	1387.16	1398.64	1388.44	1628.09	1756.81	1644.96	1425.5	1360.32	1258.32	2786.82	2725.49	2716.55	1401.89	1596.61	1628.38	3132.87	2963.83	2894.23	1935.13	1885.15	1920.84
Rv0290	eccD3	32709.6	32989.9	32816.1	3724.59	3811.43	3854.8	26776.3	25969.4	27653.6	5185.17	4264.97	4796.19	41696.7	48027.1	51848.8	5015.91	4671.53	4270.38	50813.5	51512.3	53387.6	6604.91	6802.8	6801.29
Rv2484c	Rv2484c	7347.61	7198.53	7190.87	2870.42	2940.01	2917.31	5417.82	5511.47	5298.65	1971	1982.38	1987.2	8478.67	8512.82	8367.17	4034.08	4085.02	4109.49	6473.7	6365.84	5758.33	2776.56	2832.28	2806.24
Rv3498c	mce4B	1540.03	1621.35	1500.44	984.414	1048.3	1069.35	1223.45	1150.78	1111.24	857.945	891.963	910.699	2202.95	2032.81	2178.64	1363.76	1323.89	1433.29	2089.7	2031.01	1779.3	1290.64	1215.6	1265.92
Rv1903	Rv1903	90.1883	60.5484	62.7909	234.565	214.44	220.858	44.1637	58.5602	59.7442	173.5	178.248	161.795	150.445	126.303	133.214	249.112	256.42	240.67	127.461	122.632	74.6158	253.1	225.568	251.193
Rv0933	pstB	399.015	396.928	400.292	1346.06	1360.39	1366.69	361.665	352.723	375.725	1144.66	1096.19	1112.54	666.258	630.186	603.678	1341.52	1289.89	1370.95	690.975	596.625	512.266	1574.75	1554.28	1619.08
Rv1661	pks7	1929.48	1897.18	1930.82	1619.19	1664.3	1609.96	1452.63	1440.85	1456.43	1369.62	1548.67	1360.84	2765.33	2990.06	2900.35	1929.98	1980.53	1792.62	2297.66	2287.29	2389.14	2015.58	1970.96	2075.04
Rv1441c	PE_PGRS26	172.178	190.615	204.071	156.798	178.244	176.028	93.1019	87.1594	86.2972	207.318	203.506	199.441	363.576	360.296	374.348	281.522	256.42	205.139	275.048	253.531	545.27	288.3	285.373	291.815
Rv0157A	Rv0157A	789.831	731.066	740.41	240.255	204.879	201.739	322.276	403.112	386.346	221.287	215.774	202.644	1081.77	1037.01	1038.73	215.431	233.753	252.067	877.136	877.714	727.504	296.68	300.974	308.396
Rv3234c	tgs3	482.371	518.025	476.165	944.583	975.905	886.73	421.346	446.692	447.418	714.587	710.828	742.496	755.809	733.887	720.029	1217.6	1241.73	1216.76	721.164	722.013	800.685	1023.3	1036.18	1003.12
Rv3847	Rv3847	661.381	653.699	567.735	855.435	887.124	910.464	808.077	976.457	827.125	853.534	780.107	820.189	639.393	575.676	556.463	920.188	944.222	990.166	665.819	739.925	401.778	1208.51	1153.19	1110.89
Rv3136	PPE51	1046.73	1049.51	1026.89	680.934	732.783	730.481	3153.53	3120.03	3117.32	5009.46	4766.52	4637.59	1300.28	1338.81	1421.51	765.764	750.136	696.535	4462.83	4074.41	4738.11	6770.85	6912.01	6679.42
Rv1733c	Rv1733c	9844.19	9757.26	9881.72	831.41	769.661	936.176	7426.67	7167.5	7483.96	511.679	463.301	560.676	8727.63	9212.14	9496.96	1133.08	1091.56	1166.48	9043.06	8604.9	9194.97	702.311	731.309	732.026
Rv0583c	lpqN	159.879	164.826	137.355	252.268	235.61	238.659	82.3594	66.7314	71.693	205.848	184.743	183.421	277.608	237.981	269.8	278.98	264.212	252.067	204.609	163.969	189.409	287.462	254.821	271.09
Rv1008	tatD	42.3612	53.8208	39.2443	79.6636	107.22	63.2908	40.5829	38.1322	39.8295	77.193	72.1653	81.6986	62.6856	69.1343	65.7638	78.1652	82.1679	80.4468	78.8249	89.5626	87.5301	108.95	120.26	96.1664
Rv3131	Rv3131	117518	119369	121222	20218.1	20440.1	21390.3	107486	107387	106179	15173.2	14509.6	14297.2	132876	141514	144353	26907.9	25627.2	27010.7	120096	130174	110235	20786.9	19852.6	21353.9
Rv1858	modB	17.7644	25.7891	26.1629	92.3086	102.439	101.529	45.3573	35.4085	35.8465	90.4261	72.887	80.8976	34.0293	33.2376	32.0388	146.798	145.21	144.804	30.1882	20.6683	20.0889	124.036	104.008	117.721
Rv3125c	PPE49	99.7537	93.0651	94.1864	59.4316	57.366	54.7202	140.846	134.825	119.488	104.394	104.64	128.155	132.535	128.962	124.783	58.465	77.2095	65.6982	132.493	140.544	127.708	164.264	166.413	142.592
Rv2564	glnQ	371.685	411.505	370.205	704.327	700.685	626.315	255.433	236.965	250.926	577.845	526.085	553.468	797.003	804.351	725.088	897.946	922.972	900.334	588.671	535.998	598.362	786.957	772.913	775.135
Rv0481c	Rv0481c	680.511	663.79	757.416	396.421	424.099	419.961	640.971	659.143	614.701	366.115	431.549	419.706	1004.76	842.906	903.83	484.878	478.84	481.34	872.105	868.069	655.758	594.199	557.745	562.076
Rv3858c	gltD	3427.15	3496.11	3280.83	2369.04	2373.86	2476.91	3695.43	3817.31	3692.19	2037.9	1988.88	1824.6	3553.38	3496.6	3563.05	2929.6	2947.42	2856.53	3528.67	3548.06	3237.18	2828.52	2750.37	2654.53
Rv3582c	ispD	8837.08	9106.93	8784.19	8314.1	8367.93	8453.28	15092.1	14565.1	13920.4	8075.12	7243.23	7728.52	7867.94	7223.2	6896.76	9297.84	9501.72	9623.45	8464.45	8981.07	6735.51	10580.8	10664.1	11172.7
Rv0062	celA1	183.11	181.645	222.385	367.97	407.026	360.626	120.555	113.035	134.093	330.092	274.228	269.926	252.533	300.468	308.584	512.204	488.757	429.05	233.12	261.798	377.384	379.65	455.687	393.785
Rv0308	Rv0308	1285.87	1296.18	1156.4	1217.71	1229.95	1238.79	1007.41	1044.55	1020.96	899.85	803.922	838.612	1525.95	1548.87	1502.45	1684.68	1730.48	1762.46	1098.52	1095.42	904	1203.48	1181.8	1187.99
Rv3528c	Rv3528c	578.025	607.727	549.421	350.267	340.781	319.091	375.988	390.855	358.465	285.247	336.29	289.95	678.795	640.822	691.363	351.425	385.339	419.664	585.317	566.311	433.346	429.097	427.735	425.288
Rv1527c	pks5	1344.63	1379.16	1449.42	2580.85	2559.62	2532.29	1138.71	1090.85	1168.33	3045.82	3001.36	2983.6	2251.31	2354.55	2308.48	3188.25	3154.25	2834.41	2458.66	2587.67	3082.21	4185.37	4292.3	4207.28
Rv0081	Rv0081	907.349	935.137	943.172	140.992	146.147	121.307	1089.77	1060.89	1068.76	123.509	98.1448	92.9121	1302.07	1297.6	1229.28	174.759	175.669	171.62	1190.76	1246.99	1150.81	151.693	157.963	131.814
Rv1523	Rv1523	348.455	356.563	313.955	584.832	641.27	604.559	268.563	314.591	298.721	539.616	530.415	532.643	317.01	343.012	298.466	835.668	807.512	804.468	387.416	319.67	299.898	745.891	773.563	729.539
Rv3298c	lpqC	135.282	126.703	111.192	302.848	292.976	285.468	83.553	78.9882	88.9525	252.164	214.331	205.848	214.922	202.085	200.664	372.397	335.755	359.999	139.201	122.632	140.622	325.175	304.875	316.686
Rv3136A	Rv3136A	326.591	307.227	289.1	65.1218	75.8051	66.5872	229.174	230.155	195.164	66.1654	57.7323	47.257	317.01	343.012	343.995	82.6136	87.1263	86.4803	249.892	248.02	232.457	73.7511	77.3563	91.1923
Rv3664c	dppC	51.9266	66.1547	65.4072	73.3411	60.7807	83.0692	47.7446	65.3695	54.4336	55.1379	55.5673	56.8686	68.0586	87.7474	119.724	76.2587	89.2513	87.1507	62.0536	71.6501	43.0476	74.5891	81.9066	78.757
Rv3788	Rv3788	317.025	350.957	341.426	123.289	150.244	161.523	262.595	269.649	289.427	180.852	179.692	196.237	514.022	557.063	494.071	197.002	194.795	172.961	442.761	473.993	483.568	254.776	273.672	250.364
Rv0111	Rv0111	338.889	321.804	328.344	2976	3041.08	3059.71	226.787	247.859	232.339	2833.35	2836.1	2811.39	549.842	527.814	623.913	3699.82	3456.72	3597.98	355.55	378.919	373.079	3996.8	3924.37	3968.52
Rv2536	Rv2536	840.391	855.527	796.66	1105.17	1070.83	1170.22	533.546	542.022	568.234	993.952	1042.07	1008.42	1191.03	1310.89	1177	1195.35	1222.6	1238.88	1252.81	1240.1	1406.22	1411.33	1468.47	1385.29
RVnc0002	ASdes	39.6282	25.7891	27.471	29.0835	21.1708	30.3268	26.2595	44.9415	41.1571	16.9089	30.3094	25.6309	32.2383	54.5097	67.45	31.7745	14.8752	24.8044	23.4797	48.226	40.1778	29.3328	29.2524	44.7671
Rv1386	PE15	2006.01	1962.22	1973.99	993.898	939.71	940.791	1476.5	1635.6	1460.41	938.814	1038.46	930.723	1760.57	2265.48	2187.07	812.79	762.178	762.233	2052.8	2017.23	2496.76	1365.23	1365.76	1342.19
Rv2351c	plcA	71.0574	79.6099	65.4072	651.851	729.368	691.584	57.2935	54.4746	58.4166	392.582	414.951	407.692	103.879	94.3949	101.175	749.877	779.886	762.904	50.3137	52.3597	28.6984	545.59	582.447	571.196
Rv0164	TB18.5	591.69	658.184	575.584	1980.84	2017.37	2070.8	359.278	348.637	298.721	1810.73	1720.42	1699.65	1477.59	1318.87	1381.04	2191.8	2336.12	2322.9	939.19	981.055	816.469	2411.99	2409.75	2498.67
Rv2195	qcrA	11731.3	11540.1	10960.9	10270.9	10024.7	9951.82	10747.3	10818.7	10071.5	6635.66	6476.12	6650.42	13998.6	13163.4	13269.1	12462.6	13246	13273.7	12058.5	11848.4	10238.2	9145.97	9047.43	9442.55
Rv1565c	Rv1565c	5665.46	5651.18	5470.66	2869.15	2758.35	2910.72	8745.61	8281.5	8522.18	2952.45	2641.97	2878.67	2507.42	2385.13	2436.63	3776.71	3660.72	3805.8	4117.34	4179.13	3872.85	3974.18	3824.26	4048.94
Rv1630	rpsA	6358.27	6372.16	6247.7	13312	13403.2	13211.3	6453.87	6366.72	6056.73	11695.8	11811.3	11461	9316.87	9055.26	8991.09	16037.8	16629.1	16797.3	10621.2	10640	9200.71	16169.9	15906.8	16811.7
Rv3442c	rpsI	1013.93	1037.17	991.574	1696.33	1925.18	1740.5	612.324	584.24	554.957	1631.35	1654.75	1614.75	1679.97	1887.9	1848.13	2107.28	2068.36	2001.11	1861.61	1751.29	2096.42	2277.06	2336.94	2235.87
Rv1721c	vapB12	77.8899	111.005	71.948	49.3156	57.366	60.6537	72.8105	83.0738	84.9695	49.9917	54.8456	61.6744	57.3125	47.8622	57.3325	45.7552	43.209	46.2569	70.4392	66.1386	76.0508	64.5322	73.4559	95.3374
Rv1701	Rv1701	459.14	450.749	438.228	1033.73	936.295	954.636	481.027	517.509	484.592	877.06	792.375	771.331	377.905	426.771	441.798	1286.23	1257.31	1088.04	425.99	435.412	563.924	1118.84	1132.39	1158.97
Rv3897c	Rv3897c	685.977	694.064	680.235	615.18	656.295	617.085	578.903	566.536	564.251	574.169	586.704	535.846	779.092	958.573	949.359	763.222	763.595	737.429	813.406	814.331	1093.41	781.091	766.412	824.047
Rv0492A	Rv0492A	25.9633	40.3656	37.9362	10.7483	17.0732	23.734	27.4531	21.7898	31.8636	17.6441	20.2063	16.0193	57.3125	45.2032	60.705	19.0647	19.1253	24.134	67.085	41.3366	48.7873	20.1139	32.5026	22.3836
Rv3153	nuoI	665.48	616.697	604.363	3082.22	3366.16	3063.67	619.486	690.466	698.343	2417.98	2372.8	2011.23	825.659	753.83	797.596	3744.94	3808.76	3868.82	654.079	731.658	591.187	3187.22	3034.45	3278.78
Rv1761c	Rv1761c	54.6596	59.4271	68.0235	76.5023	83.3173	77.7949	42.9701	50.389	55.7613	73.5172	77.9385	69.6841	69.8497	103.701	91.0575	85.791	86.4179	95.1954	100.627	79.9174	110.489	102.246	96.2078	111.918
Rv2907c	rimM	99.7537	126.703	120.349	208.01	191.903	220.199	133.685	132.101	108.867	208.054	188.351	205.047	211.34	172.836	204.036	235.131	255.004	261.452	219.703	231.485	185.105	284.947	250.27	306.738
Rv2890c	rpsB	1637.05	1666.2	1626.02	2217.3	2262.54	2279.13	1864.43	1811.28	1785.69	2137.88	2266.71	2096.13	2233.4	2206.98	2077.46	2829.83	2789.46	2839.1	2740.42	2768.17	2895.67	3001.17	3044.85	3017.64
Rv0744c	Rv0744c	426.345	392.443	362.356	163.753	174.83	191.191	316.308	291.439	322.619	163.208	190.516	180.217	569.543	591.63	458.66	173.489	207.545	195.754	447.792	472.615	453.435	239.691	243.77	261.971
Rv1236	sugA	545.229	522.51	544.188	440.679	478.05	518.853	685.135	776.263	711.62	428.605	375.981	373.25	625.065	541.109	581.756	575.118	547.55	615.418	550.097	578.712	460.609	554.809	541.494	547.154
Rv2642	Rv2642	5940.13	6110.9	6169.21	3359.78	3286.25	3262.11	5615.96	5560.49	5812.45	3888.32	3508.68	3714.08	5670.36	6010.69	5974.39	3608.31	3334.88	3142.79	9509.3	9605.25	12260	5118.99	5220.57	5145.73
Rv1251c	Rv1251c	151.68	177.16	196.222	1014.13	1055.81	1025.18	155.17	151.167	131.437	917.494	834.953	883.466	247.16	248.618	241.134	1376.47	1227.56	1226.14	169.39	137.789	166.451	1201.81	1213.65	1257.62
Rv1380	pyrB	233.67	251.164	240.699	183.985	177.561	164.82	285.274	231.517	276.151	147.034	141.444	136.164	216.713	188.79	236.075	231.318	206.128	205.139	390.77	431.279	513.701	191.082	199.566	201.452
Rv1011	ispE	415.413	513.54	432.996	614.548	663.124	637.523	318.695	382.684	311.998	572.699	513.817	555.07	669.84	667.412	687.99	692.048	697.719	644.245	769.8	763.349	863.822	759.301	774.863	751.093
Rv0500A	Rv0500A	2444.65	2567.7	2308.88	1393.48	1465.57	1393.72	2118.67	2399.61	2241.07	1462.99	1399.29	1501.01	3621.44	3464.69	3495.6	1477.51	1580.31	1584.8	3595.76	3437.83	3082.21	2043.24	1972.91	2060.95
Rv2763c	dfrA	315.659	319.561	286.484	526.665	554.538	540.609	355.697	343.19	311.998	421.253	464.023	450.944	388.651	352.319	411.445	693.319	618.384	711.284	352.196	410.61	347.251	605.932	609.749	645.807
Rv0877	Rv0877	4178.72	4199.14	4146.82	1593.9	1538.64	1577	3460.29	3445.52	3478.44	1429.17	1537.84	1432.93	4860.82	5376.52	5205.46	1855.63	1798.48	1745.03	5246.05	5270.42	4880.16	2098.55	2039.87	1987.99
Rv3647c	Rv3647c	1270.83	1240.12	1287.21	2634.59	2769.28	2664.15	897.598	830.738	902.801	2459.88	2266.71	2326.01	2118.77	2434.32	2384.36	3230.83	3198.17	2994.63	1702.28	1661.73	1984.49	3206.49	3326.32	3277.12
Rv2557	Rv2557	12124.9	12168	11842.6	2812.88	2866.94	2682.61	9386.58	9518.07	9507.29	2426.8	2652.08	2610.35	15782.4	15464.8	14793.5	3019.21	3056.5	3203.79	14471.9	14777.8	13446.6	3594.53	3468.68	3633.6
Rv0084	hycD	2698.82	2739.25	2867.45	319.287	312.781	301.291	2651.02	2545.33	2663.26	229.374	225.156	217.863	4285.9	4937.78	4809.19	327.277	328.671	273.519	3785.27	4009.65	4729.5	322.661	300.324	314.199
Rv1161	narG	46401.9	46683.9	46631.4	12535	12414.3	12392.5	52985.7	53059.6	51336.2	12064.9	12641.2	12142.6	48993.3	45899.8	46884.5	16237.4	15951.9	16171.8	57865.8	58764.1	53173.8	17142.9	16832.5	17185.6
Rv1559	ilvA	1508.6	1494.65	1444.19	2848.92	3021.28	2793.37	1131.55	1203.89	1067.43	2373.13	2331.66	2213.87	2084.74	2101.95	1834.64	3589.88	3751.39	3709.27	1913.6	2039.27	2162.42	3097.54	3215.81	3286.24
Rv0925c	Rv0925c	594.423	583.059	575.584	965.447	985.466	970.459	494.156	543.384	444.762	946.166	862.376	906.694	863.27	830.941	838.066	1037.12	1119.89	1157.09	739.612	635.206	473.524	1259.63	1251.35	1255.14
Rv0050	ponA1	6041.25	6134.45	6065.87	4822.18	4887.72	4876.69	6444.32	6227.81	6160.29	4106.67	4198.58	4104.15	5543.2	5376.52	5407.81	5892.89	5877.13	5987.92	5398.66	5547.37	4399.46	5711.52	5604.1	5874.44
Rv3120	Rv3120	852.689	802.827	795.352	724.559	766.929	793.113	796.141	712.255	823.142	639.599	658.869	627.958	1199.98	1115.46	1190.49	883.33	907.388	862.792	960.993	1098.18	815.034	947.031	841.818	882.907
Rv2729c	Rv2729c	5095.64	5142.13	5243.04	955.963	943.808	941.45	5145.67	5266.33	4905.66	764.578	744.024	732.884	6676.91	7031.75	6834.37	1088.59	1082.35	1045.14	5366.8	5920.78	4905.99	1045.92	953.627	1110.89
Rv1269c	Rv1269c	526.098	526.995	541.572	163.753	174.147	182.62	306.759	339.104	373.069	172.765	182.578	198.64	714.616	872.156	893.713	217.337	205.42	181.676	796.634	822.598	840.863	251.424	274.972	237.929
Rv2530c	vapC39	632.684	706.398	656.689	641.734	643.319	659.279	676.779	675.485	673.118	677.093	653.818	663.2	886.553	866.838	924.065	741.616	769.261	730.055	845.271	885.981	737.549	964.63	878.221	921.042
Rv3790	dprE1	284.23	252.285	262.937	367.338	380.391	350.736	183.817	177.042	175.25	366.115	372.373	364.44	401.188	388.216	391.21	419.423	427.131	410.949	405.864	318.292	307.073	518.772	494.04	515.651
Rv2884	Rv2884	446.842	393.565	370.205	445.105	394.733	449.628	446.412	411.283	407.588	462.423	444.538	483.784	773.719	705.967	713.284	488.056	502.924	556.424	598.734	709.612	724.635	615.989	651.353	654.927
Rv3503c	fdxD	731.072	768.068	748.259	356.589	342.147	332.277	842.692	795.329	760.743	294.804	375.981	372.449	789.838	708.626	642.461	326.641	323.713	335.195	865.396	996.212	718.895	512.067	451.787	480.832
Rv3671c	Rv3671c	763.867	753.491	774.422	1731.1	1873.27	1776.1	578.903	603.306	638.599	1331.4	1356.71	1321.59	920.583	1025.05	1016.81	2031.02	2093.16	2024.58	1071.68	985.189	855.212	1900.77	1768.79	1875.25
Rv1820	ilvG	2098.93	2041.83	2069.48	1239.21	1224.49	1273.73	2050.63	1986.96	1914.47	1173.33	1180.62	1144.58	2009.52	2325.3	2279.81	1540.43	1499.56	1416.53	2233.93	2269.38	2775.14	1586.49	1627.73	1618.25
RVnc0040	MTS2975	73.7904	63.9122	69.3317	362.28	374.928	346.121	38.1957	46.3034	58.4166	285.247	265.568	311.576	80.5958	59.8277	70.8225	416.245	400.214	425.027	77.1477	92.3184	53.092	400.602	375.73	415.34
Rv3739c	PPE67	12.2984	20.1828	18.314	46.7866	53.2684	40.216	20.2914	13.6187	15.9318	49.2565	55.5673	60.0725	16.1192	15.9541	23.6075	50.8391	55.2508	44.9161	11.7399	15.1568	17.219	77.9415	76.7062	72.9539
Rv3541c	Rv3541c	127.083	145.765	129.506	69.5476	63.5124	69.8836	152.783	153.891	156.663	63.2248	64.9488	53.6647	112.834	119.655	136.586	78.1652	78.6262	77.0948	129.139	129.521	71.746	81.2938	78.6564	92.8504
Rv0684	fusA1	6606.97	6589.69	6422.99	13591.5	14078.6	14163.3	4502.31	4739.29	4349.38	11909	12322.9	12062.6	11498.3	10749.1	11073.6	16525.9	17291.4	17535.4	11555.4	11081	8242.18	16928.4	16287.7	16865.6
Rv3462c	infA	6388.34	6424.86	6051.48	5374.76	5171.14	5442.35	6011.04	5526.45	5581.44	4302.22	5584.15	5092.54	8147.34	7402.69	7658.95	6038.42	6392.8	6833.96	8650.61	8130.91	6167.29	7075.91	6677.34	6902.43
Rv1988	erm(37)	945.61	963.168	1028.2	393.26	377.66	396.886	741.234	870.232	820.487	391.111	497.941	362.037	831.032	1112.8	1045.48	645.657	630.426	563.798	966.024	1015.5	1335.91	560.676	620.8	544.667
Rv3456c	rplQ	3183.92	3234.85	3174.87	5455.06	5696.31	5237.97	3121.3	3199.02	2839.84	4970.5	5270.95	4669.63	5140.22	5150.5	5143.06	6583.67	6737.06	6421	6054.42	5816.06	5530.18	6802.7	6763.15	6986.16
Rv2251	Rv2251	515.166	502.328	552.037	263.016	286.147	287.446	791.366	734.045	763.398	347.736	357.94	338.008	311.637	422.783	357.485	326.641	318.755	272.849	607.119	498.795	628.495	455.916	496.64	484.977
Rv2002	fabG3	281.497	265.74	283.867	337.622	329.172	323.706	222.012	249.221	189.854	240.401	246.805	297.158	447.754	461.338	559.835	382.564	379.672	392.178	417.604	391.32	284.114	372.946	358.179	348.189
Rv2239c	Rv2239c	1135.55	1161.63	1004.66	1612.24	1708.69	1613.26	1053.96	1184.82	998.392	1279.2	1305.47	1155.79	1155.21	1007.77	1050.53	2030.39	2056.32	2184.8	1182.37	1216.67	873.866	1663.59	1682.99	1803.12
Rv0769	Rv0769	407.214	422.718	368.897	173.237	192.586	155.59	395.086	388.132	350.499	152.181	166.702	150.582	415.516	396.193	485.64	167.134	182.753	154.19	493.075	541.51	489.308	206.168	221.668	218.033
Rv3135	PPE50	173.544	148.007	143.896	84.7216	85.3661	93.6176	449.993	463.034	455.384	511.679	536.91	440.531	114.625	120.985	91.0575	86.4265	85.0012	86.4803	474.626	387.186	318.552	678.845	691.006	679.797
Rv3570c	hsaA	3502.31	3488.26	3624.87	1647.65	1661.57	1705.55	4532.15	4387.93	4233.87	1514.45	1693	1533.85	2998.16	3165.55	3001.53	1711.37	1695.07	1665.92	3964.72	4042.72	3905.85	2199.96	2201.08	2117.32
Rv2357c	glyS	457.774	472.053	467.008	536.781	512.197	545.224	429.701	473.929	422.192	486.684	523.92	481.381	628.647	697.99	720.029	567.492	595.009	607.373	813.406	792.285	627.06	696.445	698.157	656.585
Rv3824c	papA1	1928.12	2004.83	1750.3	802.326	827.027	832.01	565.773	571.983	614.701	793.25	832.788	821.791	4760.52	4045.68	4252.72	766.4	805.387	824.58	2304.37	2206	1874.01	1114.65	1071.29	1180.53
Rv0159c	PE3	101.12	85.2163	107.268	76.5023	83.3173	76.4764	38.1957	55.8365	43.8124	66.1654	93.8149	79.2957	132.535	170.177	116.351	90.8749	88.543	77.7652	139.201	147.434	173.625	113.979	112.459	102.799
Rv2078	Rv2078	51.9266	41.4869	32.7036	46.7866	40.9757	37.5789	50.1318	65.3695	66.3824	50.7268	39.6909	48.058	32.2383	35.8966	30.3525	47.0262	48.1674	39.553	33.5425	45.4703	41.6127	54.4752	69.5556	65.4927
Rv3492c	Rv3492c	485.104	523.632	456.542	643.631	647.416	681.035	311.533	309.143	317.308	569.023	553.508	626.356	936.702	801.692	853.243	688.87	761.47	819.217	727.872	739.925	575.403	836.404	746.91	819.902
Rv1608c	bcpB	635.417	670.518	652.764	1188.63	1219.03	1373.94	514.448	486.186	484.592	997.628	1055.78	1066.09	1137.3	1003.78	944.3	1390.45	1534.98	1581.45	551.774	560.8	446.26	1464.96	1428.82	1389.44
Rv0205	Rv0205	207.706	223.132	239.39	642.367	690.441	678.398	176.655	213.813	244.287	577.11	588.147	570.288	282.981	300.468	313.643	760.045	763.595	753.518	271.694	303.135	271.2	785.281	821.667	772.648
Rv3660c	Rv3660c	90.1883	91.9439	99.419	268.074	286.83	256.46	82.3594	73.5407	58.4166	262.456	257.63	205.848	103.879	113.008	114.665	320.286	306.004	287.597	92.2419	114.365	149.232	351.156	331.527	315.857
Rv3587c	Rv3587c	845.857	862.254	877.765	2623.84	2675.71	2421.53	599.194	612.839	649.22	2615.74	2605.17	2587.12	1309.23	1501.01	1301.79	2954.39	2912.71	2669.49	875.459	830.866	1146.5	3642.3	3634.44	3437.95
Rv0459	Rv0459	478.271	435.052	477.473	439.414	482.148	437.761	338.986	396.303	354.482	338.914	337.012	359.634	539.096	547.756	507.561	497.588	480.257	467.262	625.568	582.846	561.054	479.382	491.44	446.013
Rv1698	mctB	250.067	214.162	226.309	3349.03	3392.11	3345.18	269.757	241.05	293.41	3324.45	3063.42	3155.01	177.311	202.085	193.919	4515.15	4532.69	4432.62	187.838	163.969	175.06	4376.45	4259.14	4442.72
Rv2902c	rnhB	1494.94	1379.16	1424.57	2709.83	2615.62	2606.79	1675.83	1596.11	1618.4	2304.03	2405.99	2136.98	1954	1921.14	1870.05	3326.79	3281.05	3280.22	1886.77	1946.95	2237.04	3065.7	3112.45	3207.48
Rv1133c	metE	9651.51	9892.94	9999.46	15101.9	15353.6	15061.9	11223.6	10201.7	11127	20213.5	19152	18717.8	6488.85	7705.81	8237.33	18593.8	17185.8	15693.2	10272.4	10123.3	14527.1	25886.6	27001.9	26687
Rv1902c	nanT	210.439	236.587	198.838	276.294	240.391	278.216	230.368	246.498	231.011	199.967	196.29	218.664	229.25	215.38	271.486	285.335	316.63	314.413	218.026	195.66	193.714	273.214	273.672	295.132
Rv2563	Rv2563	241.869	238.83	283.867	486.201	473.27	526.764	193.366	211.089	207.113	430.075	420.002	417.303	388.651	396.193	411.445	577.66	636.093	577.206	308.591	270.066	298.463	579.113	588.948	566.221
Rv1952	vapB14	218.638	188.373	155.669	165.017	149.561	139.108	157.557	201.556	203.13	111.011	129.176	148.179	279.399	249.947	269.8	139.172	163.627	178.994	280.08	275.577	196.584	180.187	163.163	189.017
Rv1237	sugB	654.548	597.635	613.52	508.962	519.709	514.897	673.198	717.703	643.91	458.012	402.682	434.124	768.346	667.412	650.893	556.688	659.468	641.563	674.204	614.538	496.482	584.98	592.198	594.408
Rv1067c	PE_PGRS19	2.73298	6.7276	1.30814	13.9095	9.561	7.25207	5.96807	5.44746	2.6553	17.6441	22.3712	12.8155	3.58203	9.30654	8.43125	9.53234	10.6252	7.37429	11.7399	9.64521	18.654	15.0854	32.5026	24.8706
Rv0851c	Rv0851c	299.261	307.227	287.792	177.662	176.879	175.368	331.825	298.248	306.687	166.149	143.609	160.193	417.307	409.488	403.014	239.579	240.129	248.715	400.833	400.965	327.162	195.273	204.767	243.732
Rv3791	dprE2	578.025	515.783	569.043	687.257	700.002	688.947	381.957	384.046	375.725	705.765	713.715	680.821	917.001	966.55	1021.87	838.846	816.72	788.379	877.136	858.423	839.428	947.031	969.879	950.887
Rv3001c	ilvC	2936.58	2798.68	2828.21	2943.76	2923.62	2960.82	2452.88	2542.6	2486.69	2498.85	2517.13	2405.3	3748.6	3555.1	3654.1	3350.93	3497.8	3359.99	4635.57	4695.84	4073.74	3390.87	3345.82	3398.16
Rv3146	nuoB	228.204	243.315	201.454	1781.05	1837.08	1666	202.914	231.517	216.407	1229.94	1351.66	1159.8	297.309	215.38	227.644	1957.94	2084.66	2053.4	226.412	199.794	215.238	1699.63	1694.69	1716.07
Rv3110	moaB1	4.09947	5.60633	6.54072	15.174	7.51222	11.867	14.3234	13.6187	9.29354	26.4662	33.196	48.8589	10.7461	7.97703	6.745	15.2517	13.4585	12.067	21.8026	15.1568	14.3492	46.9325	48.7539	52.2283
Rv2418c	Rv2418c	437.276	426.081	405.525	458.382	460.294	433.806	392.699	374.513	390.329	368.321	416.394	440.531	689.542	550.415	586.815	519.83	541.883	581.228	586.994	632.45	540.965	592.523	538.244	540.522
Rv0507	mmpL2	1862.52	1739.08	1701.9	1574.3	1696.4	1633.69	1736.71	1767.7	1601.14	1576.94	1511.86	1475.38	1905.64	1703.1	1728.41	1783.18	1853.74	1941.45	1935.4	2031.01	1604.24	2118.67	2015.16	2090.79
Rv3317	sdhD	244.602	222.011	274.71	315.493	286.83	251.845	175.461	201.556	180.56	238.931	261.96	271.528	385.069	373.591	303.525	312.025	320.171	331.843	313.622	300.379	209.498	351.156	368.58	332.437
Rv1817	Rv1817	666.847	667.154	729.945	304.745	324.391	315.135	1058.74	1039.1	920.061	307.302	318.971	311.576	485.366	400.181	387.838	400.358	400.214	450.502	566.868	571.823	467.784	435.802	421.234	421.972
Rv3575c	Rv3575c	128.45	136.795	115.117	292.732	342.83	270.304	93.1019	129.377	132.765	248.488	227.321	202.644	114.625	190.119	155.135	355.874	408.006	304.357	150.941	146.056	154.971	305.899	312.025	307.567
Rv0709	rpmC	1300.9	1277.12	1254.51	5122.5	5078.26	5276.87	917.889	836.185	807.211	3885.38	4350.85	4209.88	2804.73	2375.83	2563.1	5105.52	5326.74	5709.71	3376.05	3323.46	2416.41	5762.64	5508.55	5683.77
Rv1522c	mmpL12	2666.02	2604.7	2529.95	1837.95	1850.74	1934.98	2436.17	2422.76	2255.68	1801.17	1903.72	1836.62	4149.79	3900.77	3982.92	2294.12	2307.78	2420.78	3825.52	3757.5	3143.91	2622.35	2459.15	2466.34
Rv2855	mtr	691.443	686.215	714.247	551.955	537.465	587.418	617.099	629.182	665.152	485.948	474.126	458.153	882.971	850.883	859.988	594.182	706.219	647.597	853.657	947.986	668.673	644.484	637.052	649.953
Rv1917c	PPE34	57.3925	47.0932	45.7851	129.611	127.708	109.44	46.551	54.4746	50.4507	91.8965	114.021	132.96	98.5059	86.4179	80.94	137.901	146.627	149.497	82.1791	81.2953	41.6127	140.797	149.512	170.778
Rv1794	Rv1794	6173.8	6524.65	6562.96	4960.64	5084.4	5039.53	6236.63	6080.73	5787.22	4932.27	5309.2	5030.07	9632.09	9036.65	8910.15	5495.71	5465.58	5833.06	8085.42	8103.35	6307.91	6808.56	6841.15	7125.44
Rv3134c	Rv3134c	67100.1	67190.8	67291	2812.88	2731.03	2892.26	70237	68550.8	67650.4	2272.42	2393.72	2408.51	44257.8	49363.2	48255.4	3735.4	3441.13	4067.93	59491	58031.1	61473.4	3225.77	3176.16	3214.94
Rv1273c	Rv1273c	207.706	239.951	226.309	526.033	549.075	549.179	188.591	197.47	183.216	494.035	508.044	512.618	372.532	317.752	433.366	563.679	544.716	548.379	380.707	329.315	337.206	730.806	670.854	656.585
Rv3807c	Rv3807c	513.8	541.572	566.427	722.03	738.929	691.584	512.061	449.415	533.715	654.303	557.116	625.555	531.932	570.358	608.736	858.546	857.804	768.267	650.724	684.81	866.692	772.71	897.723	821.56
Rv1782	eccB5	7186.37	7067.34	6893.92	3526.06	3464.5	3501.43	7013.68	6975.47	6732.51	2897.31	3140.63	3057.29	6687.66	6527.87	6465.08	4196.13	4227.4	4238.21	7124.43	7217.37	5561.75	4156.88	4065.43	4116.92
Rv1250	Rv1250	677.779	663.79	702.474	390.731	361.269	394.249	560.999	547.47	495.213	307.302	337.734	320.387	655.512	708.626	677.873	455.646	439.173	451.172	862.042	828.11	774.857	455.078	410.183	448.5
Rv2799	Rv2799	561.627	567.361	531.107	407.169	400.196	431.168	519.222	543.384	511.145	396.257	422.167	386.066	560.588	580.994	536.228	388.284	438.465	450.502	726.195	629.694	684.457	554.809	519.392	562.905
Rv0179c	lprO	7200.03	7094.26	6816.74	1751.33	1771.52	1897.41	11600.7	11447.8	11348.7	2418.71	2315.06	2292.37	6902.58	6257.98	6262.73	2411.05	2426.08	2558.21	8618.74	8588.37	7969.54	3162.08	3129.35	3235.67
Rv0045c	Rv0045c	1490.84	1593.32	1486.05	654.38	698.636	646.093	1821.46	1602.92	1647.61	571.964	523.92	556.672	1448.93	1450.49	1453.55	636.125	653.093	656.982	2347.97	2401.66	2155.25	729.13	739.11	771.819
Rv3591c	Rv3591c	61.492	43.7294	26.1629	132.14	133.854	139.767	20.2914	19.0661	33.1912	105.13	97.4232	124.951	87.7598	66.4753	80.94	134.724	142.377	122.011	68.7621	56.4934	84.6603	129.902	146.912	166.633
Rv3814c	Rv3814c	1130.09	1065.2	1079.22	537.413	649.465	563.024	839.111	852.528	771.364	529.324	522.477	493.395	1121.18	1118.11	1212.41	732.719	738.803	730.725	1239.4	1255.25	1025.97	673.816	678.655	742.803
Rv0176	Rv0176	769.333	845.435	784.887	2381.69	2516.59	2384.61	736.46	735.407	712.947	1970.26	1958.57	1944.75	1328.93	1316.21	1232.65	2767.55	2701.62	2760.67	1177.34	1065.11	1449.27	2624.87	2567.06	2756.5
Rv2835c	ugpA	45.0941	42.6081	40.5525	134.669	128.391	124.604	53.7126	40.856	49.123	102.924	101.031	93.7131	69.8497	57.1687	50.5875	149.975	159.377	152.849	48.6366	55.1155	47.3524	155.045	139.111	108.602
Rv2756c	hsdM	250.067	236.587	223.693	551.323	558.636	575.551	244.691	209.727	224.373	448.455	529.693	529.439	358.203	349.66	278.231	536.353	582.967	628.826	323.685	414.744	262.59	720.749	629.901	688.917
Rv0177	Rv0177	1131.45	1057.35	1064.83	2809.72	2902.45	2741.94	1038.44	1006.42	1006.36	2268	2442.07	2273.94	1636.99	1439.85	1554.72	3274.04	3339.84	3677.09	1274.61	1390.29	1041.75	3219.07	2993.49	3225.72
Rv3568c	hsaC	2014.2	2204.41	2162.36	808.649	792.88	752.897	2609.24	2686.96	2565.02	774.871	701.447	688.03	2113.4	1917.15	1998.21	812.155	923.68	860.781	2158.46	2232.18	2046.2	1005.7	967.278	952.545
Rv3534c	hsaF	621.752	660.426	621.369	291.468	247.22	235.363	903.566	886.574	836.419	252.899	250.414	237.086	370.741	380.239	389.524	314.567	316.63	308.379	496.429	479.505	631.365	326.013	350.378	322.489
Rv0678	Rv0678	1803.77	1806.36	1810.47	812.442	784.002	814.21	3351.67	3290.27	3220.88	1601.2	1698.77	1686.03	1135.5	1076.9	1016.81	925.908	836.554	1006.26	1445.68	1449.54	1325.87	2217.56	2106.17	2410.79
Rv0634A	Rv0634A	556.161	543.814	456.542	1381.47	1473.76	1455.03	379.569	382.684	377.052	1126.28	1182.79	1090.92	737.899	700.649	706.539	1406.97	1520.11	1520.44	649.047	675.165	502.222	1548.77	1498.37	1543.64
Rv3024c	trmU	694.176	703.034	715.555	665.76	710.246	652.686	848.66	778.987	819.159	589.608	563.611	623.953	884.762	920.018	834.694	841.387	834.429	858.099	890.553	902.516	1150.81	781.091	805.415	809.954
Rv2440c	obg	599.889	595.393	614.828	1041.95	1038.73	1029.13	403.442	389.493	402.278	904.996	840.004	851.427	918.792	1021.06	1038.73	1351.05	1377.02	1256.98	960.993	947.986	810.73	1175.83	1123.94	1206.23
Rv3920c	Rv3920c	1407.48	1296.18	1347.39	5095.31	5201.19	4972.28	1299.85	1330.54	1261.27	3883.18	4393.42	4000.83	3284.73	3161.56	3030.19	5760.07	5956.46	5729.15	3151.32	3465.39	3029.12	5455.9	5441.59	5655.58
Rvnt05	tyrT	1.36649	0	2.61629	1.89675	1.36586	8.57063	1.19361	4.0856	2.6553	1.47034	4.32992	2.4029	3.58203	1.32951	1.68625	6.35489	3.54172	2.68156	3.35425	1.37789	1.43492	5.02848	2.60021	4.14511
Rv0961	Rv0961	255.533	272.468	242.007	338.254	357.172	363.922	298.404	325.486	282.789	273.484	281.445	289.95	426.262	404.17	419.876	428.955	416.506	465.921	355.55	341.716	262.59	388.869	372.48	377.205
Rv1695	ppnK	1105.49	994.564	998.114	1720.99	1835.71	1814.34	883.275	936.963	894.835	1409.32	1385.57	1441.74	1366.55	1409.28	1443.43	2168.92	2190.2	2171.39	1202.5	1172.58	1018.79	1932.61	1882.55	1887.68
Rv0404	fadD30	122.984	117.733	122.966	397.053	348.294	358.648	78.7785	98.0543	88.9525	307.302	343.507	350.823	180.893	194.108	150.076	362.864	431.381	436.424	140.878	190.148	129.143	493.629	414.084	442.697
Rv0100	Rv0100	225.471	193.979	196.222	31.6125	27.3172	32.964	26.2595	66.7314	33.1912	33.8179	20.2063	27.2329	591.036	526.484	601.991	31.7745	39.6672	45.5865	202.932	220.462	169.321	35.1994	35.1028	39.793
Rv0985c	mscL	128.45	127.824	122.966	141.624	157.757	142.404	83.553	87.1594	86.2972	134.536	158.764	150.582	162.983	154.223	180.429	186.198	207.545	191.061	161.004	165.346	150.667	218.739	187.215	193.162
Rv0007	Rv0007	1041.26	1011.38	1019.04	1185.47	1083.13	1038.36	1125.58	1105.83	1099.29	1050.56	1047.84	936.33	1122.97	1138.06	1195.55	1228.4	1217.64	1052.51	1118.64	1273.17	1531.06	1397.08	1348.21	1339.7
Rv1275	lprC	2420.05	2226.84	2325.88	1253.75	1343.32	1218.35	1987.37	2001.94	1909.16	1163.04	1148.15	1131.77	2190.41	2331.95	2338.83	1344.69	1386.23	1285.81	2715.27	2525.67	2168.16	1542.07	1534.77	1551.1
Rv0720	rplR	646.349	624.546	608.287	1299.91	1248.39	1179.45	328.244	379.96	394.312	1182.16	1250.62	1017.23	1078.19	1398.64	1273.12	1541.06	1602.27	1418.55	1162.25	1208.41	1661.64	1462.45	1634.88	1541.15
Rv3601c	panD	349.821	322.925	308.722	694.844	743.027	714.658	145.621	190.661	172.594	686.65	627.117	680.02	603.573	662.094	608.736	732.719	798.303	730.725	380.707	369.274	288.419	905.965	877.571	895.343
Rv3028c	fixB	1622.02	1695.36	1686.2	2845.76	2859.42	2804.57	1567.22	1545.72	1631.68	2899.52	2821.66	2741.71	2371.31	2766.7	2605.26	3854.24	3546.68	3416.98	2607.93	2506.38	4019.21	3651.52	3858.06	3862.41
Rv1877	Rv1877	978.406	958.683	1011.2	1244.9	1262.05	1252.63	945.342	942.411	937.32	1068.2	967.737	1060.48	954.612	917.359	878.536	1349.14	1337.35	1305.92	1132.06	1223.56	984.355	1417.19	1357.31	1382.81
Rv2601	speE	199.507	201.828	214.536	297.158	256.098	302.609	143.234	108.949	122.144	266.132	241.754	233.081	343.875	429.43	408.073	369.855	317.338	316.424	365.613	312.78	489.308	321.823	352.329	320.831
Rv2944	Rv2944	28.6963	42.6081	40.5525	99.8956	88.0978	90.3212	28.6467	27.2373	37.1742	78.6634	87.32	70.485	60.8946	31.9081	60.705	122.649	97.0431	126.033	45.2824	48.226	43.0476	101.408	103.358	113.576
Rv2889c	tsf	1429.35	1446.43	1534.45	1556.6	1555.71	1443.16	1386.98	1352.33	1440.5	1639.43	1538.56	1476.98	1619.08	1878.59	1846.44	1884.22	1897.65	1614.97	2347.97	2141.24	3436.63	2020.61	2216.68	2007.89
Rv1455	Rv1455	116.152	104.278	104.652	90.4119	69.6587	91.6398	113.393	110.311	102.229	82.3392	76.4952	72.8879	119.998	123.644	75.8813	85.791	90.668	83.1284	145.91	140.544	139.187	87.9984	110.509	111.918
Rv1825	Rv1825	423.612	401.414	376.746	710.65	668.587	719.933	341.374	356.809	278.806	560.936	513.095	603.128	463.873	444.055	436.739	781.652	843.637	827.261	327.039	395.454	334.336	783.605	741.06	721.248
Rv0502	Rv0502	6515.42	6612.11	6391.59	4739.35	4705.38	4790.32	5534.79	5877.81	5673.04	4042.71	3795.17	3803.79	9875.67	9361.05	9279.44	5587.22	5595.21	5526.02	7213.31	7400.63	7021.06	5186.88	5279.08	5123.35
Rv1473A	Rv1473A	38.2617	43.7294	41.8606	61.3283	79.9027	76.4764	28.6467	28.5992	17.2594	53.6675	57.7323	44.8541	71.6407	71.7933	89.3713	74.3522	85.0012	78.4356	48.6366	67.5165	57.3968	63.6941	81.2566	63.8346
Rv2302	Rv2302	3748.28	3754	3696.82	1249.33	1237.47	1191.98	2297.71	2371.01	2247.71	1193.18	1254.95	1221.47	4789.18	5099.98	4969.38	1267.8	1390.48	1269.72	4602.03	4498.8	4789.76	1640.96	1649.83	1622.39
Rv3687c	rsfB	508.334	516.904	504.944	707.489	674.734	726.525	350.923	337.743	359.793	555.055	572.993	591.113	1076.4	982.505	1048.85	844.565	836.554	903.015	553.451	529.109	401.778	712.368	770.312	818.244
Rv3142c	Rv3142c	3738.71	3757.37	3770.07	2363.35	2373.86	2346.37	1782.07	1924.32	1910.49	2022.46	2205.37	2138.58	5344.39	4859.34	5070.55	2330.97	2460.79	2552.85	3572.28	3028.6	3231.44	2842.77	2834.88	2845.2
Rv0389	purT	1329.59	1223.3	1223.12	473.556	521.758	512.26	1160.19	1216.15	1194.88	488.889	445.26	459.755	1139.09	1212.51	1151.71	561.137	512.841	581.228	1366.86	1167.07	1235.47	613.475	613.65	640.004
Rv3924c	rpmH	456.407	461.962	414.682	558.277	521.758	526.764	230.368	226.07	242.96	441.838	423.61	486.987	977.895	760.477	723.401	552.875	576.592	593.966	984.472	876.336	734.679	584.142	618.2	605.185
Rv2838c	rbfA	1410.22	1663.96	1548.84	1892.96	1900.59	1811.04	1679.42	1692.8	1528.12	1564.45	1716.09	1569.89	1748.03	1974.32	1986.4	2486.03	2398.45	2227.04	2436.86	2332.76	2727.78	2139.62	2165.33	2181.98
Rv2967c	pca	2933.85	3076.76	2881.84	2452.5	2486.54	2388.57	1860.84	1756.81	1809.59	2165.08	2224.14	2086.52	4860.82	4746.33	4777.15	2930.24	2885.08	2823.68	3174.8	3244.92	3184.09	2893.89	2824.48	2947.17
Rv3196	Rv3196	13.6649	15.6977	17.0059	29.0835	20.4879	25.0526	9.54891	12.2568	9.29354	17.6441	14.4331	13.6164	30.4473	13.2951	11.8038	15.2517	20.542	24.134	16.7712	12.401	10.0444	22.6282	21.4517	17.4094
Rv0218	Rv0218	155.78	126.703	164.826	120.128	129.074	116.033	78.7785	88.5212	92.9354	94.8371	80.1035	80.0966	161.192	144.916	148.39	108.033	143.085	133.408	137.524	135.033	130.578	101.408	108.559	131.814
Rv1144	Rv1144	184.476	180.524	176.6	343.312	350.342	331.617	128.91	125.292	123.471	315.389	317.527	316.382	220.295	236.652	268.114	396.545	401.631	428.379	276.726	238.374	278.374	405.631	443.336	415.34
Rv0859	Rv0859	5102.47	5054.67	5402.64	4228.49	4300.4	4376.95	4126.32	3960.3	4247.15	3671.45	3612.6	3759.74	6134.23	6816.37	6795.59	6177.59	5877.84	6146.14	5001.19	5601.11	6414.09	4894.39	4852.64	4990.71
Rv3070	Rv3070	105.22	78.4887	71.948	78.3991	92.1954	94.9362	81.1658	117.12	80.9866	69.8413	67.8354	77.6937	130.744	81.0998	87.685	85.791	102.001	95.8658	88.8876	79.9174	64.5714	94.7031	89.0572	104.457
Rv1860	apa	531.564	540.451	477.473	673.979	697.27	639.501	333.018	340.466	374.397	689.591	614.127	612.739	702.079	680.707	691.363	665.993	728.886	588.602	711.101	646.229	916.914	807.909	917.874	828.192
Rv2990c	Rv2990c	2219.18	2269.44	2108.73	2224.89	2255.71	2236.27	2038.69	2158.56	2121.58	2662.79	2615.27	2603.94	1201.77	1119.44	1042.1	1171.21	1158.14	1250.28	1880.06	1765.07	1779.3	3509.04	3560.99	3428.83
Rv0645c	mmaA1	270.565	285.923	273.402	340.151	372.879	356.67	260.208	269.649	228.356	330.092	354.332	353.226	410.143	357.637	391.21	399.087	404.464	450.502	538.357	487.772	418.997	475.191	465.438	441.039
Rv3010c	pfkA	2786.27	2955.66	2893.62	2490.44	2654.54	2558	3135.62	3121.39	2788.06	2251.83	2308.57	2252.32	3633.97	3707.99	3630.5	2991.88	2977.17	2981.22	2906.46	3448.85	2472.37	2981.05	2872.58	3222.4
Rv0125	pepA	2160.42	2199.93	2158.44	1353.02	1363.81	1191.98	1686.58	1726.84	1642.3	1218.91	1239.8	1102.93	2878.16	3017.98	3178.58	1492.76	1572.52	1328.71	2567.68	2758.53	3188.39	1543.74	1582.23	1619.08
Rv2127	ansP1	1559.16	1614.62	1401.02	3507.09	3743.82	3608.89	1386.98	1523.93	1530.78	2924.51	2709.81	2752.92	2260.26	1885.24	1721.66	3908.26	3959.64	4182.56	1898.51	2037.89	1419.14	3690.91	3650.05	3831.74
Rv3221c	TB7.3	276.031	303.863	293.024	464.704	471.221	473.362	297.21	375.875	351.827	424.194	435.879	350.022	299.1	247.288	323.76	467.084	501.507	569.161	384.062	355.495	208.063	533.857	516.792	562.905
Rv0599c	vapB27	271.931	267.983	289.1	418.55	465.075	437.102	281.693	303.696	347.844	405.815	413.507	542.254	368.95	271.219	308.584	464.542	493.007	479.329	330.394	292.112	275.505	582.466	616.25	610.16
Rv2530A	vapB39	233.67	253.406	252.472	234.565	224.001	232.066	137.266	162.062	138.075	226.433	211.444	229.877	401.188	337.694	327.133	218.608	285.463	270.838	342.133	275.577	245.371	311.766	281.473	295.961
Rv3794	embA	979.773	928.409	877.765	2935.54	2926.35	2880.39	559.805	516.147	539.025	2538.55	2428.36	2373.26	1461.47	1627.31	1576.64	3555.56	3567.22	3189.05	1244.43	1065.11	1384.7	3171.3	3377.67	3209.14
Rv0856	Rv0856	650.449	630.152	635.758	552.587	486.928	551.157	673.198	614.201	609.391	441.838	562.168	507.012	895.508	765.795	827.949	619.602	664.426	748.155	660.787	680.676	533.79	663.76	627.951	719.59
Rv3797	fadE35	226.837	198.464	215.844	503.272	509.465	534.675	189.785	201.556	180.56	511.679	520.312	445.337	266.862	389.545	365.916	542.708	507.882	561.116	286.788	243.886	308.508	675.493	629.251	662.388
Rv1736c	narX	80549.1	80213.2	80936.2	1265.13	1172.59	1259.88	62963.2	62039.8	62404.8	819.716	891.242	829.801	77685.4	80920.3	82853.9	1604.61	1386.23	1780.56	80409.7	80124.1	88461.4	1081.12	1155.14	1138.25
Rv2836c	dinF	263.732	308.348	325.728	780.83	825.661	793.772	373.601	344.552	385.018	785.163	762.066	615.142	358.203	385.557	453.601	1093.68	1041.97	935.194	441.084	493.283	843.733	909.317	978.329	988.193
Rv3090	Rv3090	64.225	63.9122	71.948	115.07	96.9759	108.122	45.3573	51.7509	59.7442	87.4854	80.1035	113.737	68.0586	51.8507	75.8813	125.827	131.044	116.648	77.1477	49.6039	44.4825	124.874	128.06	119.379
Rv1347c	mbtK	420.879	473.175	497.095	74.6056	105.171	96.2547	243.497	291.439	262.874	94.8371	121.238	110.533	850.733	825.623	927.438	85.791	85.7096	101.229	873.782	737.169	784.901	139.121	151.462	142.592
Rv2595	vapB40	579.391	571.846	536.339	359.751	352.391	346.781	467.897	473.929	521.766	338.179	324.744	322.789	664.467	583.653	720.029	368.584	371.88	365.363	721.164	710.99	575.403	447.535	435.535	425.288
Rv1787	PPE25	291.062	288.166	299.565	252.9	264.293	294.698	324.663	291.439	317.308	219.816	248.249	209.853	419.098	389.545	330.505	324.099	371.172	367.374	335.425	337.582	307.073	291.652	294.474	315.028
Rvnr03	rrf	8.19893	11.2127	10.4652	3.7935	9.561	7.25207	17.9042	16.3424	3.98295	17.6441	6.49488	10.4126	21.4922	2.65901	10.1175	5.08391	5.66675	6.03351	26.834	12.401	31.5682	13.4093	14.9512	18.2385
Rv2608	PPE42	936.045	938.5	900.004	847.216	812.002	845.855	558.611	522.956	535.043	642.54	740.416	719.268	1452.51	1326.85	1448.49	859.181	875.513	824.58	1272.94	1413.71	1608.55	921.888	934.776	929.333
Rv0053	rpsF	628.585	659.305	570.351	818.765	799.027	876.841	519.222	478.015	549.647	827.068	909.283	855.432	741.481	716.603	704.853	899.217	937.847	972.065	972.732	885.981	638.539	1130.57	1140.19	1165.6
RVnc0021	mcr3	467.339	435.052	378.054	223.185	243.806	195.147	463.122	479.376	423.52	215.405	188.351	299.561	589.245	495.906	428.308	198.273	238.003	215.195	590.348	575.957	513.701	339.422	282.773	310.054
Rv2299c	htpG	1266.74	1301.79	1270.21	1961.24	1915.62	1899.38	1252.1	1190.27	1160.37	1636.49	1825.78	1665.21	1740.87	1567.49	1527.74	2285.22	2355.24	2369.83	1341.7	1295.21	1150.81	2277.9	2279.08	2234.21
Rv0357c	purA	301.994	300.5	279.943	413.492	420.684	422.598	290.048	299.61	297.393	336.709	357.94	388.469	361.785	331.047	359.171	443.571	481.674	498.77	437.73	400.965	365.905	479.382	484.289	468.397
Rv1040c	PE8	17.7644	19.0615	34.0118	27.819	26.6342	29.0083	22.6787	13.6187	15.9318	24.2607	20.9279	18.4222	37.6114	25.2606	13.49	33.0454	33.2922	39.553	25.1569	20.6683	34.4381	25.9805	31.8526	26.5287
Rv1430	PE16	155.78	146.886	146.512	234.565	203.513	214.266	83.553	81.7119	82.3142	163.943	165.98	146.577	222.086	194.108	188.86	191.918	235.17	211.843	134.17	170.858	136.317	227.958	203.466	201.452
Rv0999	Rv0999	392.182	380.109	324.42	672.715	684.978	718.614	393.893	416.731	338.55	679.299	591.034	611.137	415.516	392.204	338.936	819.781	777.053	826.591	415.927	370.652	456.305	848.137	852.869	788.399
Rv1169c	lipX	10.9319	14.5765	15.6977	10.7483	16.3903	13.1856	22.6787	17.7042	22.57	24.2607	36.8043	49.6599	26.8653	19.9426	16.8625	8.89685	15.5836	14.7486	18.4484	17.9125	11.4794	47.7706	39.6532	59.6895
Rv3208A	TB9.4	240.502	274.71	234.158	498.846	519.026	479.296	218.431	221.984	205.786	446.984	441.652	420.507	336.711	332.376	257.996	545.25	577.3	543.016	333.748	287.978	305.638	573.247	583.747	573.683
Rv0470c	pcaA	3969.65	4194.66	3719.06	3376.22	3120.3	3324.74	3784.95	4081.51	4030.74	2978.18	2885.89	2922.73	4488.29	3988.52	4025.08	3401.14	3531.09	3797.09	4570.17	4673.79	3666.22	3890.37	3815.16	3909.66
Rv3535c	hsaG	409.947	361.048	351.891	188.411	209.659	231.407	551.45	554.279	541.681	174.236	185.465	157.79	191.639	188.79	195.605	238.308	238.003	229.273	358.905	343.094	342.946	217.901	237.919	227.981
Rv0258c	Rv0258c	221.371	269.104	285.176	199.791	219.22	228.77	204.108	172.957	201.803	185.998	172.475	189.028	259.697	247.288	244.506	196.366	190.544	221.899	219.703	181.881	157.841	253.938	231.419	238.758
Rv0635	hadA	386.716	441.779	389.827	1126.67	1129.56	1151.1	433.282	458.949	377.052	938.079	1023.3	913.102	565.961	509.201	480.581	1225.86	1272.89	1386.37	533.326	465.726	383.124	1317.46	1164.89	1316.49
Rv3113	Rv3113	8.19893	14.5765	6.54072	21.4965	8.87807	18.4598	20.2914	20.428	15.9318	36.7586	38.2476	36.8444	14.3281	7.97703	6.745	17.1582	18.4169	16.7597	13.417	16.5346	18.654	59.5037	48.1039	40.622
Rv0996	Rv0996	3380.69	3342.5	3335.77	4475.07	4734.06	4658.47	4554.83	4707.97	4572.42	4351.48	4631.57	4178.64	2697.27	3108.38	2962.74	5340.65	5129.83	5062.79	3857.39	4078.55	4360.72	5909.3	5721.76	5740.97
Rv0845	Rv0845	144.848	158.099	149.128	350.267	344.196	366.559	146.815	122.568	147.369	344.06	289.383	331.6	281.19	239.311	205.723	383.2	395.964	394.86	238.152	213.572	220.978	424.069	455.687	390.469
Rv3646c	topA	1725.88	1807.48	1686.2	3961.68	4146.74	3916.78	1388.17	1402.72	1327.65	3436.93	3361.46	3344.03	2349.81	2383.8	2291.61	4439.53	4687.11	4503.68	2923.23	2921.12	2783.74	4448.53	4495.76	4435.26
Rv2487c	PE_PGRS42	25.9633	20.1828	31.3955	34.7738	47.805	35.6011	17.9042	32.6848	19.9147	42.64	41.8559	28.0338	21.4922	54.5097	38.7838	55.923	46.0423	44.2457	31.8654	31.6914	41.6127	46.0944	57.8547	44.7671
Rv0758	phoR	4300.34	4377.43	4345.66	1901.18	1872.59	1858.51	5404.69	5459.72	5268.11	1894.54	1798.36	1867.85	3576.66	3733.25	3785.63	2348.13	2176.03	2172.06	3699.74	3831.9	3720.75	2510.89	2392.84	2427.37
Rv1039c	PPE15	20.4973	37.0018	17.0059	33.5093	17.7561	23.734	19.0978	23.1517	35.8465	33.0827	29.5878	25.6309	21.4922	35.8966	28.6663	38.7648	31.1671	34.1899	21.8026	16.5346	27.2635	39.3898	35.7529	42.2801
Rv3404c	Rv3404c	265.099	254.528	236.774	427.401	415.221	427.872	284.08	273.735	305.359	413.902	381.033	440.531	329.547	288.503	273.173	480.43	501.507	549.72	290.143	318.292	286.984	548.943	524.592	554.615
Rv1424c	Rv1424c	334.79	290.408	272.094	426.769	448.001	448.31	261.402	302.334	268.185	348.471	345.672	379.658	390.442	303.127	281.604	588.463	549.675	641.563	271.694	243.886	222.413	483.572	427.735	505.703
Rv1771	Rv1771	911.448	871.224	992.882	1533.21	1481.96	1553.92	901.179	823.928	841.729	1374.77	1383.41	1378.46	1266.25	1366.73	1261.32	1958.58	1969.2	1962.23	1110.26	1078.89	1114.93	1857.19	1771.39	1823.02
Rv0731c	Rv0731c	117.518	133.431	151.745	151.74	149.561	156.249	99.07	110.311	100.901	154.386	160.207	147.378	162.983	191.449	198.978	162.05	191.961	152.849	197.901	129.521	225.282	188.568	231.419	187.359
Rv3859c	gltB	14037.9	14138.1	14184.2	7597.12	7628.31	7557.32	15240.1	15036.4	14479.3	6480.54	6564.16	6470.21	12390.3	11853.9	11849.3	9206.97	9229.01	9348.59	12187.7	12571.8	9899.51	8564.34	8375.28	8754.46
Rv2525c	Rv2525c	3435.35	3376.13	3486.21	943.95	908.978	944.747	4330.43	4567.7	4427.71	1279.2	1294.65	1144.58	1518.78	2108.6	1891.97	1437.48	1299.81	1221.45	3597.43	3389.6	5332.16	1576.43	1751.24	1570.99
Rv0995	rimJ	226.837	195.1	221.076	378.718	443.904	416.664	193.366	226.07	219.062	376.408	445.26	407.692	247.16	272.549	286.663	497.588	493.007	437.094	330.394	290.734	276.94	504.524	545.394	568.708
Rv1827	garA	8699.07	8683.09	8466.31	6527.99	6640.8	6566.42	8207.29	8619.24	8313.74	5938.72	5848.28	5772.56	9995.67	9099.14	8805.6	6810.54	6873.77	7312.61	8675.77	8719.27	7148.77	7732.13	7563.36	7808.55
Rv2634c	PE_PGRS46	241.869	245.557	294.333	283.248	272.489	283.49	225.593	197.47	191.181	233.785	241.754	219.465	227.459	267.231	236.075	306.306	327.255	314.413	290.143	281.089	278.374	287.462	317.876	307.567
Rv3494c	mce4F	1673.95	1628.08	1760.76	1570.51	1511.32	1575.68	1076.64	1035.02	1133.81	1422.56	1296.81	1315.19	2654.29	2885.03	2888.55	1741.24	1741.11	1712.18	2329.53	2172.93	2623.03	1751.59	1762.94	1789.03
Rv2565	Rv2565	916.914	972.138	956.254	1688.11	1682.74	1740.5	925.051	887.936	803.228	1275.52	1352.38	1326.4	1373.71	1357.43	1249.51	2084.4	2054.2	2117.09	1046.53	1054.08	889.65	1783.43	1690.14	1725.19
Rv1935c	echA13	47.8271	50.457	41.8606	39.1995	34.1464	32.964	48.9382	59.9221	82.3142	38.9641	41.1342	24.029	53.7305	58.4982	30.3525	32.4099	36.8339	38.8826	75.4706	67.5165	73.1809	37.7136	50.0541	49.7413
Rv0672	fadE8	3274.11	3130.58	3482.28	1734.9	1716.88	1715.44	2727.41	2654.27	2765.49	1879.1	1779.6	1777.34	4568.88	5212.99	5512.35	1990.99	1950.07	1794.63	4018.39	3789.19	4089.52	2376.8	2388.29	2376.8
Rv0108c	Rv0108c	11484	11626.4	11307.6	6558.34	6459.14	6468.85	8060.48	8349.59	7900.84	7236.29	7477.77	7602.77	18870.2	16637.4	16604.5	6213.81	6455.84	6524.91	14666.5	13875.3	11384.7	9885.16	9808.64	9612.5
Rv0824c	desA1	71448.2	71170.2	68116.4	38197.4	36677.4	39587.7	62267.3	62867.8	59764.1	35641.1	36587.1	37456.4	95215.8	86191.8	89939.5	41902.2	41159.7	46478.8	75502.5	69605.3	57038.1	48826.6	44974.5	50252.8
Rv3630	Rv3630	375.784	455.234	351.891	536.149	561.367	545.224	378.376	393.579	371.742	499.917	494.332	475.774	492.53	445.384	455.288	638.031	632.551	624.133	469.595	497.417	523.746	654.541	633.151	643.32
Rv1856c	Rv1856c	377.151	407.02	415.99	940.157	805.856	859.041	410.603	416.731	426.175	859.416	818.355	758.515	831.032	942.619	954.418	1508.02	1492.48	1334.08	528.294	508.44	621.32	1021.62	1127.84	1046.22
Rv2443	dctA	532.931	540.451	527.182	460.279	545.66	471.385	451.186	472.567	443.435	421.253	396.188	396.478	793.421	664.753	679.559	580.201	552.508	568.491	556.805	500.173	532.355	528.829	558.395	503.216
Rv2313c	Rv2313c	1060.4	1061.84	1068.75	918.028	924.003	959.91	1124.38	1156.22	1054.15	875.589	891.242	833.806	1615.5	1625.99	1625.55	1062.54	1068.18	1115.53	1506.06	1588.7	1439.22	1094.53	1136.29	1181.36
Rv0929	pstC2	636.784	629.031	575.584	567.129	646.051	607.196	674.392	764.006	723.569	494.035	483.508	454.949	685.96	712.615	607.05	791.819	865.596	814.524	540.034	472.615	483.568	624.37	633.801	620.937
Rv0065	vapC1	982.506	1094.36	1144.63	344.577	338.733	393.59	1033.67	1035.02	1023.62	355.088	341.342	362.037	1307.44	1277.65	1256.26	381.293	388.881	377.43	1012.98	1084.4	881.041	456.754	454.387	476.687
Rv0112	gca	165.345	149.128	151.745	261.752	251.318	267.667	71.6169	100.778	95.5907	259.516	267.012	257.911	275.817	277.867	251.251	256.102	274.837	301.675	226.412	202.549	156.406	341.937	338.027	349.018
Rv3763	lpqH	14717.1	15027.2	13914.7	3626.59	3679.62	3673.5	6364.35	6278.2	6099.22	3039.2	3252.49	3169.42	25930.3	25986.5	26602.3	3492.01	3567.93	3551.73	24660.4	22663.5	22788	4145.14	4216.89	4030.7
Rv0141c	Rv0141c	1157.42	1282.73	1139.39	627.825	663.807	644.775	1073.06	1173.93	1141.78	573.434	563.611	622.351	1319.98	1277.65	1342.26	653.918	711.177	799.105	1487.61	1499.14	1087.67	776.062	761.212	767.674
Rv3281	accE5	1024.87	1096.6	1011.2	1703.92	1855.52	1702.26	1145.87	1173.93	1091.33	1612.97	1607.12	1553.07	1452.51	1275	1394.53	1956.04	1926.69	1934.75	1484.26	1522.56	1090.54	2136.27	1985.26	2133.07
Rv0243	fadA2	15069.6	15085.5	15633.6	12908	13259.1	13057.7	15384.5	15401.3	15463.1	10467.4	10355	10566.3	16486.3	18457.5	17510	16086.1	15620.4	15652.9	14430	14609.7	16916.3	13555.9	13348.8	14195.3
Rv0088	Rv0088	1594.69	1547.35	1470.35	988.84	1019.61	994.852	1443.08	1500.78	1431.21	949.107	957.634	885.068	2586.23	2435.65	2500.71	1087.96	1061.81	1059.89	1715.7	1683.78	1348.82	1268.85	1212.35	1176.38
Rv2182c	Rv2182c	6370.57	6524.65	6165.29	2406.35	2306.93	2421.53	5951.36	6041.23	5450	2044.51	2003.31	2067.29	7237.5	6864.24	6798.96	2751.67	2671.87	2904.13	6222.13	6313.48	4894.51	2771.53	2556.66	2680.23
Rv1953	vapC14	195.408	165.947	184.448	204.217	193.269	203.717	199.334	230.155	176.577	155.121	147.217	193.033	222.086	192.778	195.605	193.189	178.503	213.854	212.995	259.043	249.676	228.796	200.216	219.691
Rv0881	Rv0881	76.5234	75.1249	78.4887	158.695	180.293	176.687	70.4232	68.0933	59.7442	161.003	160.207	133.761	148.654	162.2	160.194	188.74	196.211	184.357	150.941	141.922	139.187	195.273	207.367	193.162
Rv0015c	pknA	1451.21	1543.98	1480.82	1878.42	1800.88	1710.83	2121.05	2102.72	2185.31	1845.28	1856.09	1760.52	1223.26	1350.78	1200.61	2268.7	2249.7	2157.32	1415.49	1539.1	1696.08	2327.35	2377.89	2443.13
Rv0252	nirB	189.942	263.498	194.914	142.256	165.269	156.249	180.236	194.747	165.956	127.92	143.609	142.572	308.055	331.047	350.74	217.337	203.295	219.888	223.058	176.37	219.543	191.92	159.263	193.162
Rv3198A	Rv3198A	71.0574	85.2163	75.8724	288.306	292.294	306.565	39.3893	64.0077	50.4507	252.899	249.692	277.935	125.371	116.996	128.155	308.848	308.13	341.229	78.8249	68.8943	66.0063	349.479	316.576	356.479
Rv0652	rplL	388.083	402.535	419.914	933.202	992.978	981.666	238.723	217.898	238.977	1062.32	1095.47	995.601	576.707	717.933	632.344	1286.87	1275.02	1059.89	835.208	757.838	1456.44	1358.53	1443.77	1327.26
Rv1411c	lprG	4770.41	4762.02	4795.66	3830.17	3612.69	3827.77	5124.19	5115.17	4856.54	2984.06	3229.4	3111.75	4576.05	4213.2	4251.04	3996.59	4065.89	4107.48	4759.68	4636.59	3818.32	4116.65	3957.52	4121.06
Rv2200c	ctaC	4273.01	4448.07	4450.31	6366.76	6100.6	6232.82	4144.23	4544.54	4170.15	4516.16	4394.87	4213.08	5870.95	5312.7	5244.24	6946.53	7139.4	7641.11	5251.08	5342.07	4192.84	5698.11	5603.45	5859.52
Rv3194c	Rv3194c	509.7	492.236	422.531	543.103	536.099	522.808	300.791	296.887	276.151	464.628	513.817	513.419	599.991	654.117	679.559	596.724	582.259	628.155	603.765	584.224	549.574	602.58	678.655	664.875
Rv3877	eccD1	6289.95	6179.3	6101.19	4394.14	4329.77	4536.5	7402.8	7550.18	7213.12	3528.09	3538.27	3581.92	5896.03	5738.15	5851.29	5053.41	5127.7	5295.41	5719	5913.89	4961.95	4751.08	4509.42	4653.3
Rv3905c	esxF	42.3612	28.0317	19.6222	25.9223	27.3172	27.6897	29.8404	27.2373	14.6041	16.1738	28.1445	29.6358	39.4024	17.2836	33.725	24.1486	31.8755	30.1675	33.5425	15.1568	22.9587	36.8755	31.2025	29.0157
Rv1289	Rv1289	446.842	390.201	376.746	783.991	758.734	750.26	452.38	479.376	414.226	643.275	637.941	600.725	417.307	460.009	435.053	854.097	902.43	898.993	431.021	457.458	331.466	797.014	821.667	840.627
Rv2386a	Rv2386a	366.219	345.35	332.269	233.301	215.123	212.288	447.605	428.987	435.469	268.338	324.744	313.979	431.635	429.43	426.621	219.244	206.836	233.296	600.411	613.16	472.089	394.736	387.431	402.904
Rv1100	Rv1100	1500.4	1458.77	1527.91	1123.51	1162.34	1130	1434.72	1472.18	1443.15	936.609	965.572	929.121	1302.07	1461.13	1426.57	1310.38	1288.48	1160.45	1502.7	1528.08	1430.62	1260.47	1243.55	1191.3
Rv0714	rplN	467.339	553.906	478.781	1393.48	1328.3	1224.28	454.767	478.015	435.469	1202.01	1453.41	1263.92	997.596	991.811	1021.87	1637.02	1579.61	1731.62	1046.53	1118.84	988.66	1723.09	1686.24	1705.3
Rv0697	Rv0697	486.47	521.389	507.56	722.663	712.978	747.622	373.601	377.237	339.878	507.268	518.147	564.681	1208.94	1039.67	1037.04	779.745	779.178	823.239	597.056	617.293	505.092	691.416	660.453	722.906
Rv3487c	lipF	1038.53	997.927	1000.73	667.657	634.441	690.924	273.338	324.124	335.895	732.966	741.859	712.86	3338.46	3065.84	3052.11	758.774	838.679	815.194	949.253	1138.13	859.517	948.707	975.079	928.504
Rv1689	tyrS	409.947	435.052	410.757	673.347	695.222	623.678	307.952	330.933	311.998	574.904	567.941	521.429	562.379	591.63	617.168	812.79	806.804	721.34	662.464	558.044	637.104	754.272	706.607	710.471
Rv2048c	pks12	3334.23	3518.54	3407.72	10634.5	10822.4	10609.8	2708.31	2716.92	2822.58	9663.1	9413.97	9001.26	5349.77	5873.75	6009.8	13884.2	13731.2	12402.2	4867.02	4925.95	5475.65	12037.3	12248.9	12291.9
Rv0128	Rv0128	170.811	179.403	184.448	219.391	261.562	236.022	138.459	138.91	143.386	198.496	214.331	200.242	272.235	222.027	241.134	252.289	275.546	307.039	187.838	219.084	185.105	267.348	271.722	259.484
Rv3583c	Rv3583c	68748.1	70897.7	69267.6	42488.5	42679	43158.4	81356.7	84547.3	77354.1	42373.8	45177.7	43313.9	77167.8	70664.5	71132.8	43807.4	46856.9	49147.6	81330.5	80333.6	61796.3	57551	53786.7	59083.5
Rv3170	aofH	532.931	507.934	532.415	514.652	491.709	516.215	412.991	340.466	387.673	471.245	404.847	465.361	617.901	724.58	728.46	567.492	576.592	545.027	583.639	600.759	757.638	588.332	559.045	600.211
Rv2238c	ahpE	910.082	886.922	956.254	1404.86	1405.47	1510.41	907.147	1036.38	893.508	1126.28	1140.93	1203.85	843.569	814.987	804.341	1724.72	1829.65	1852.29	909.002	901.138	680.152	1545.42	1460.67	1513.79
Rv3632	Rv3632	315.659	230.981	266.862	373.028	394.733	409.412	195.753	198.832	152.68	332.298	368.043	349.221	390.442	312.434	352.426	402.9	441.298	429.05	283.434	281.089	274.07	421.554	453.087	491.61
Rv3156	nuoL	2430.98	2523.97	2454.08	10712.9	10770.5	10622.3	2628.34	2680.15	2565.02	8649.29	8205.92	7913.55	2530.71	2742.77	2824.47	13078.4	13020.8	12557.1	1994.1	1971.76	1973.01	10670.4	10662.8	10885.9
Rv0466	Rv0466	624.485	548.299	599.13	1260.71	1225.17	1249.33	488.188	509.338	532.387	1055.71	1069.49	1054.07	895.508	912.041	935.869	1458.45	1598.73	1602.9	883.845	877.714	799.25	1409.65	1407.36	1316.49
Rv3680	Rv3680	8479.06	8604.6	8400.9	5752.22	5864.31	5921.64	9710.05	9482.67	9589.61	5339.55	5093.43	5398.51	7525.85	7640.67	7615.11	6323.12	6228.47	6317.08	9256.05	9032.05	9334.15	6854.66	6883.41	6840.25
Rv3697A	vapB48	821.26	796.099	846.37	594.316	596.88	651.368	467.897	552.917	485.92	544.762	624.23	539.851	1275.2	1164.65	1155.08	688.87	777.053	817.205	919.064	808.82	670.108	753.434	712.458	759.383
Rv1510	Rv1510	423.612	413.747	426.455	345.841	342.83	297.994	442.831	494.357	484.592	311.713	310.311	272.329	306.264	358.966	349.054	400.994	381.089	359.329	425.99	332.071	472.089	394.736	393.932	375.547
Rv0227c	Rv0227c	1773.7	1822.06	1843.18	2409.51	2580.1	2543.5	1098.13	917.897	943.958	2596.63	2697.54	2818.6	2998.16	2976.76	3075.72	2791.07	2763.96	2685.58	2886.33	2754.4	2656.04	3554.3	3413.43	3580.54
Rv1060	Rv1060	293.795	239.951	238.082	543.736	540.197	521.49	216.044	238.326	231.011	364.645	437.322	394.876	385.069	469.315	370.975	606.257	669.385	669.049	323.685	292.112	284.114	523.8	530.443	501.558
Rv1274	lprB	2405.02	2336.72	2369.05	1315.71	1387.03	1439.87	2264.29	2164	2069.8	1189.51	1242.69	1278.34	2441.16	2353.22	2367.5	1405.07	1459.19	1430.61	2802.48	2615.23	2013.19	1622.52	1550.38	1652.24
Rv1206	fadD6	1954.08	1973.43	2059.02	1321.4	1337.17	1348.88	1847.71	1800.39	1775.07	1251.26	1213.1	1235.09	2819.06	2647.05	2694.63	1619.86	1584.56	1529.16	2368.1	2121.95	2237.04	1633.42	1623.83	1546.95
Rv3808c	glfT2	3399.82	3350.35	3427.34	4035.02	4122.16	3959.63	3718.11	3504.08	3607.22	3604.55	3600.33	3624.37	3668	3444.75	3672.65	4464.95	4454.77	4693.4	3993.23	3710.65	3367.76	4802.2	4558.17	4710.5
Rv2903c	lepB	4598.24	4514.22	4496.09	6819.46	6939.92	6989.68	4341.18	4426.06	4536.58	6209.26	6294.98	6194.67	5546.78	5392.47	5340.36	8206.07	8272.75	8475.74	5903.48	5675.52	5141.32	8131.05	7970.95	8169.17
Rv1547	dnaE1	4845.57	4849.48	4684.47	8497.45	8492.22	8670.84	3401.8	3282.09	3361.61	6332.03	6528.8	6330.04	5670.36	5556	5544.39	9843.73	10057.8	10546.6	5443.95	5700.32	4903.12	8333.03	8096.41	8480.06
Rv2063	mazE7	66.958	58.3059	62.7909	69.5476	79.9027	69.2243	38.1957	53.1127	84.9695	51.462	51.959	54.4657	30.4473	46.5327	57.3325	59.1005	76.5011	48.9385	77.1477	53.7376	43.0476	68.7226	65.6553	71.2958
Rv1388	mihF	3056.84	2952.3	2875.3	3936.39	4287.43	4280.04	2229.67	1982.88	2059.18	3940.52	3875.28	4041.68	4316.35	4089.56	4256.1	4385.51	4514.27	4413.85	4041.87	3790.57	3687.74	5212.86	5208.87	4961.69
Rv3288c	usfY	1658.92	1760.39	1270.21	374.292	376.977	388.975	1398.92	1500.78	1582.56	399.198	365.156	374.852	2564.74	2141.83	2153.34	390.19	381.797	362.011	1740.86	1798.14	1648.72	439.992	499.24	539.693
Rv0734	mapA	702.375	668.275	566.427	1537	1634.25	1594.14	623.067	589.688	650.548	1406.38	1397.12	1380.87	884.762	897.416	827.949	1983.36	2010.99	1868.38	999.566	1023.77	1028.84	1768.35	1848.75	1808.92
Rv0226c	Rv0226c	226.837	275.832	248.547	617.077	650.148	633.567	219.625	208.365	199.147	678.563	612.684	647.181	352.83	392.204	367.603	678.067	639.634	549.72	363.936	384.43	470.654	824.671	848.969	840.627
Rv1265	Rv1265	4917.99	5028.88	4993.19	4757.05	4725.18	4783.73	3219.18	3282.09	3004.47	3694.24	3705.69	3730.1	14715	14047.6	14184.7	5301.25	5508.79	5556.19	9871.56	10398.9	10761.9	4956.41	4424.26	5064.49
Rv2761c	hsdS	288.329	338.623	357.123	883.254	884.393	928.265	446.412	431.711	379.708	699.148	676.189	659.195	404.77	378.909	426.621	1093.68	1107.85	1062.57	417.604	355.495	334.336	885.851	869.77	884.566
Rv0255c	cobQ1	388.083	384.595	415.99	317.39	326.44	326.343	307.952	309.143	285.445	312.448	289.383	313.178	438.799	506.542	492.385	335.538	344.255	294.301	508.169	519.463	652.889	394.736	407.583	382.179
RVnc0015	mcr15	97.0207	105.399	105.96	125.186	94.9271	123.285	148.008	114.397	132.765	82.3392	115.465	107.329	193.43	155.552	146.704	125.191	140.96	134.078	115.722	112.987	76.0508	134.093	124.81	137.618
Rv3659c	trbB	57.3925	85.2163	54.9421	149.211	154.342	173.39	40.5829	51.7509	53.106	114.687	106.083	108.931	94.9239	86.4179	89.3713	158.237	176.378	167.597	77.1477	71.6501	87.5301	140.797	141.711	145.079
Rv1649	pheS	247.334	288.166	269.478	320.551	320.294	299.972	367.633	343.19	358.465	324.211	315.362	332.401	437.008	385.557	369.289	369.855	405.881	392.849	286.788	326.559	315.682	426.583	423.834	407.878
Rvnt06	thrT	38.2617	51.5783	51.0176	176.398	165.269	160.205	26.2595	46.3034	39.8295	141.888	126.289	143.373	60.8946	82.4293	60.705	138.537	165.752	147.486	51.9909	77.1617	58.8317	181.025	189.165	161.659
Rv0942	Rv0942	25.9633	25.7891	15.6977	16.4385	30.0489	19.7784	14.3234	13.6187	3.98295	16.1738	27.4228	17.6213	51.9395	43.8737	43.8425	28.597	34.0005	25.4748	26.834	22.0462	17.219	23.4662	31.8526	24.0416
Rv3426	PPE58	215.905	207.434	253.78	333.196	354.44	329.64	163.525	177.042	175.25	425.664	441.652	442.133	359.994	329.717	340.623	353.332	362.672	412.96	373.999	348.605	312.813	593.361	508.991	597.724
Rv1507c	Rv1507c	172.178	206.313	171.367	448.266	456.879	451.606	190.978	211.089	213.751	357.293	438.043	397.279	257.906	194.108	232.703	428.955	461.132	490.055	229.766	230.107	185.105	495.305	514.842	534.719
Rv3077	atsF	422.245	392.443	381.978	567.129	632.392	591.373	248.272	238.326	270.84	538.146	568.663	551.866	621.483	686.025	716.656	668.534	636.801	595.306	516.554	462.97	516.571	732.482	705.957	710.471
Rv2952	Rv2952	345.722	308.348	345.35	1465.56	1407.52	1466.24	348.535	313.229	333.24	1315.22	1441.14	1396.08	460.291	398.852	441.798	1437.48	1417.4	1466.14	338.779	367.896	282.679	1872.27	1733.69	1771.62
Rv2027c	dosT	852.689	920.56	879.073	329.403	355.123	388.975	1191.23	1074.51	1097.97	327.887	334.125	327.595	1002.97	1027.71	986.456	483.607	420.756	497.429	1038.14	1100.93	799.25	416.526	434.235	430.262
Rv0223c	Rv0223c	348.455	338.623	303.49	431.195	392.001	413.368	278.112	321.4	276.151	322.74	363.713	353.226	499.694	416.135	426.621	452.468	463.257	461.899	357.228	369.274	311.378	464.296	438.786	443.526
Rv1048c	Rv1048c	128.45	108.763	107.268	99.2634	99.0247	95.5955	176.655	182.49	159.318	96.3075	95.2582	110.533	111.043	101.042	75.8813	102.949	116.877	124.022	120.753	112.987	101.879	138.283	123.51	129.327
Rv2007c	fdxA	79104.7	79482.1	75799.1	2522.05	2401.18	2633.82	96259	98988.5	92550.4	2134.94	2190.22	2353.24	58994.3	55501.5	57779.4	3073.86	2794.42	3521.56	83036.1	77692.1	62393.2	2926.58	2915.49	2792.14
Rv0458	Rv0458	1790.1	1928.58	1983.15	1922.04	1929.27	1997.62	1324.91	1255.64	1160.37	1543.86	1519.08	1529.04	2317.58	2294.73	2217.42	2165.11	2065.53	2122.45	2096.41	2024.12	1965.84	1966.14	1981.36	1987.16
Rv0577	TB27.3	3766.04	3696.82	3658.88	1282.84	1463.52	1381.85	4233.75	4165.95	4077.21	1465.2	1537.12	1550.67	3447.71	3621.57	3883.43	1480.05	1506.65	1459.44	4197.84	3921.47	3964.68	1963.62	1879.95	2042.71
Rv1737c	narK2	51106.7	51339.4	53028.3	2268.52	2182.64	2311.43	38177.8	36702.3	39424.5	1676.93	1540.01	1630.77	46514.5	53075.2	52052.9	3163.46	2661.96	3071.73	48514.2	47278.1	67349.4	2065.87	2128.92	2065.92
Rv3314c	deoA	718.773	742.279	657.997	367.338	357.855	347.44	580.097	674.123	663.824	335.238	350.002	364.44	943.866	938.631	932.496	533.811	476.007	459.217	898.939	834.999	891.085	423.231	476.489	451.816
Rv2018	Rv2018	415.413	399.171	419.914	338.886	306.635	280.194	304.372	311.867	315.98	252.164	234.537	233.882	625.065	655.446	601.991	376.845	399.506	309.72	446.115	500.173	414.692	292.49	325.026	311.712
Rv1320c	Rv1320c	681.878	663.79	652.764	971.137	955.417	994.193	478.639	486.186	472.643	920.435	933.819	881.063	997.596	946.608	961.163	927.178	1032.06	1053.18	1048.2	923.184	737.549	1185.05	1149.29	1197.11
Rv1719	Rv1719	68.3244	60.5484	71.948	134.669	156.391	143.723	42.9701	53.1127	45.1401	142.623	159.485	116.14	59.1036	106.36	94.43	164.592	166.461	181.005	100.627	77.1617	119.098	173.483	170.964	197.307
Rv1003	Rv1003	162.612	167.069	184.448	213.068	243.123	227.451	170.687	166.148	172.594	185.998	206.393	200.242	241.787	232.663	242.82	245.934	233.753	240	295.174	276.955	301.333	264.833	228.819	274.406
Rv1514c	Rv1514c	71.0574	82.9737	100.727	156.166	174.83	188.554	81.1658	81.7119	90.2801	139.683	153.712	166.601	136.117	122.314	128.155	199.544	218.17	235.307	95.5961	122.632	87.5301	198.625	182.665	213.058
Rv1541c	lprI	16.3979	21.3041	17.0059	163.753	150.927	147.019	8.3553	16.3424	19.9147	119.833	126.289	137.766	41.1934	29.2491	33.725	165.863	171.419	172.29	13.417	26.1798	18.654	151.693	187.215	153.369
Rv3409c	choD	2790.37	2807.65	2768.03	3063.25	3035.62	3074.88	3503.26	3357	3508.98	2620.15	2583.52	2568.7	2398.17	2508.78	2490.59	3793.87	3794.6	3768.26	2800.8	2678.61	2644.56	3311.25	3278.87	3432.15
Rv2193	ctaE	5931.93	6218.55	5937.67	7401.76	7494.46	7448.53	4411.6	4925.87	4930.89	4866.84	4674.87	5070.92	6864.97	6466.71	6905.2	8418.32	8641.09	9219.87	5661.97	5930.42	4908.86	6499.31	6011.04	6322.11
Rv1282c	oppC	140.748	179.403	166.134	481.775	508.782	513.578	116.974	107.587	99.5737	395.522	382.476	407.692	343.875	271.219	335.564	631.041	604.926	622.122	221.38	219.084	166.451	540.562	488.84	498.242
Rv1165	typA	2631.86	2590.13	2579.66	1538.27	1614.44	1569.08	3699.01	3592.6	3462.51	1527.69	1547.95	1510.62	2412.5	2261.49	2300.05	1940.15	1906.15	1828.15	2841.05	2922.5	2855.49	1935.13	1984.61	1980.53
Rv1145	Rv1145	106.586	109.884	64.0991	91.6764	99.7076	91.6398	64.4552	76.2644	62.3995	70.5765	93.0933	88.1063	148.654	132.951	131.528	103.585	107.668	116.648	132.493	103.342	123.403	113.141	105.309	106.115
Rv0156	pntAb	127.083	99.7927	120.349	443.208	425.465	450.947	90.7147	76.2644	73.0207	427.87	453.92	473.371	186.266	118.326	146.704	451.833	460.423	464.58	134.17	114.365	90.4	553.133	570.096	620.108
Rv3653	PE_PGRS61	13.6649	10.0914	10.4652	8.21926	14.3415	4.61495	9.54891	9.53306	5.3106	5.1462	6.49488	6.40773	10.7461	17.2836	6.745	8.89685	7.79178	10.0558	15.0941	5.51155	18.654	7.54272	7.80063	8.29021
Rv2612c	pgsA1	419.512	398.05	374.129	421.711	428.879	406.775	362.859	363.618	408.916	365.38	301.651	325.993	361.785	405.499	431.68	550.333	530.549	508.156	414.25	374.785	394.603	421.554	428.385	426.946
Rv3753c	Rv3753c	1717.68	1888.21	1636.49	997.059	1057.86	1025.18	1283.14	1224.32	1246.66	909.407	959.799	990.795	2294.29	2389.12	2318.59	946.879	954.847	955.306	2285.92	2259.73	2211.21	1265.5	1202.6	1208.71
Rv1891	Rv1891	1134.19	1190.79	1072.68	1275.25	1324.2	1256.59	1260.46	1334.63	1285.16	1056.44	1077.43	1140.58	1568.93	1411.93	1379.35	1336.43	1425.9	1535.19	1501.03	1518.43	1312.95	1459.1	1396.31	1352.13
Rv1483	fabG1	590.323	551.663	608.287	1453.54	1389.76	1544.03	688.715	675.485	593.459	1085.85	1217.43	1164.6	660.885	636.833	689.676	1732.34	1806.98	1871.06	655.756	694.455	585.447	1425.57	1508.77	1521.25
Rv3362c	Rv3362c	288.329	304.985	310.03	704.96	732.1	742.348	208.882	251.945	205.786	588.137	579.487	555.871	565.961	632.845	537.914	814.061	813.179	819.217	412.573	434.034	352.99	782.767	722.859	711.3
Rv2597	Rv2597	382.617	356.563	414.682	475.453	443.904	434.465	342.567	333.657	282.789	399.933	448.147	363.639	499.694	571.687	522.738	498.223	522.049	527.597	553.451	552.533	535.225	506.2	538.894	512.335
Rv3405c	Rv3405c	163.979	187.252	176.6	118.231	131.805	135.152	120.555	164.786	154.007	139.683	138.557	109.732	232.832	281.855	244.506	129.64	113.335	122.681	303.56	323.803	330.032	160.073	178.114	160.001
Rv3620c	esxW	169.445	209.677	215.844	92.3086	96.293	82.4099	114.587	114.397	98.246	63.9599	95.9799	90.5092	241.787	253.936	257.996	92.1459	101.293	94.525	238.152	236.997	173.625	110.627	100.758	111.089
Rv3619c	esxV	207.706	214.162	201.454	75.8701	83.3173	77.1356	157.557	134.825	132.765	89.6909	101.031	67.2812	281.19	317.752	273.173	90.8749	106.96	97.2065	211.318	219.084	311.378	124.874	107.259	101.141
Rv0873	fadE10	7646.87	7565.19	7315.14	3791.61	3678.94	3827.11	7070.97	7010.88	6530.71	3334.74	3489.19	3480.2	7774.8	7647.32	7593.19	4026.46	4032.6	4204.69	8194.43	7931.12	7308.05	4409.14	4294.25	4519.82
Rv0072	Rv0072	364.853	338.623	355.815	907.912	866.637	909.146	300.791	364.98	272.168	747.67	728.148	652.787	601.782	615.561	635.716	975.476	1001.6	1014.97	518.232	643.473	441.955	943.678	917.224	872.13
Rv1350	fabG2	366.219	364.412	415.99	233.301	243.123	288.105	551.45	614.201	537.698	266.132	270.62	252.304	420.889	392.204	359.171	235.766	244.379	274.86	432.698	431.279	365.905	343.613	323.726	347.36
Rv3191c	Rv3191c	45.0941	60.5484	41.8606	61.3283	71.0246	73.18	31.034	38.1322	25.2253	46.3158	59.8972	64.8783	87.7598	65.1458	67.45	73.7167	78.6262	71.7317	62.0536	70.2722	48.7873	77.1034	74.7561	67.1507
Rv1033c	trcR	643.616	694.064	606.979	367.97	354.44	346.121	565.773	586.964	566.906	289.658	298.043	325.993	664.467	603.595	588.501	287.241	344.255	310.391	583.639	598.003	434.781	366.241	399.782	403.733
Rv2510c	Rv2510c	315.659	299.378	265.553	871.874	860.49	913.761	150.395	162.062	147.369	760.903	798.148	733.685	562.379	561.051	610.423	1112.74	1095.81	1068.6	436.052	308.647	385.993	983.068	956.227	1001.46
Rv1765c	Rv1765c	0	0	1.30814	1.89675	4.09757	1.31856	3.58084	2.72373	1.32765	2.94069	3.60827	4.00483	1.79102	2.65901	5.05875	6.99038	4.25006	6.03351	0	2.75577	0	3.35232	3.90032	6.63217
Rv3432c	gadB	535.664	483.266	481.397	738.469	760.783	713.34	341.374	360.894	338.55	588.872	624.23	597.521	857.897	872.156	920.693	742.887	794.762	749.496	635.63	658.63	507.962	782.767	791.764	741.974
Rv0506	mmpS2	956.542	864.497	864.684	782.726	822.246	753.556	635.003	608.754	614.701	733.701	723.096	744.098	1235.8	1229.79	1160.14	815.332	913.055	920.445	1163.92	1096.8	812.165	936.136	915.924	962.493
Rv0804	Rv0804	133.916	152.492	132.123	245.946	245.854	258.437	176.655	164.786	173.922	246.282	186.908	205.848	180.893	235.322	251.251	298.044	296.796	248.715	206.286	241.13	281.244	248.072	280.173	288.499
Rv1440	secG	527.465	502.328	414.682	1028.04	1005.95	1028.48	294.823	307.781	302.704	836.625	830.623	934.728	848.942	756.489	747.009	940.524	1051.18	1051.84	657.433	694.455	540.965	1118	1081.04	1125.81
Rv1310	atpD	14665.2	14725.6	14631.6	13017.4	12950.4	12768.9	12583.1	12373.9	11956.8	7921.47	8013.96	7915.95	20091.6	19698	20192.8	15688.3	16225.3	15768.2	18072.7	17805.1	15144.1	10248.9	9921.75	10308
Rv2223c	Rv2223c	4553.14	4598.32	4647.84	972.402	1030.54	1031.11	6222.31	6039.87	6073.99	1171.86	1057.94	1174.22	3136.07	3186.82	3426.46	1327.54	1306.19	1289.16	4395.74	4457.46	4895.95	1439.82	1417.11	1492.24
Rv0651	rplJ	788.464	690.7	609.595	1916.98	1946.35	1919.16	593.226	682.294	659.842	1771.76	1804.85	1880.67	648.348	860.19	775.675	2252.17	2214.28	2194.86	1185.73	1269.03	1328.74	2344.11	2318.09	2309.65
Rv1114	vapC32	92.9212	90.8226	91.5701	133.405	122.244	107.462	59.6807	98.0543	96.9184	94.102	109.691	112.135	123.58	110.349	102.861	104.856	118.293	131.396	120.753	154.323	121.968	145.826	120.26	138.447
Rv2445c	ndkA	286.963	287.044	256.396	648.057	609.855	640.16	264.982	261.478	258.892	506.533	552.786	539.05	356.412	329.717	404.7	769.577	791.22	764.245	365.613	409.232	391.733	626.884	732.609	673.994
Rv3831	Rv3831	113.419	109.884	128.198	133.405	122.244	133.174	74.0041	66.7314	75.676	134.536	103.196	111.334	275.817	239.311	252.938	139.808	158.669	131.396	233.12	183.259	180.8	165.94	133.261	147.566
Rv3857c	Rv3857c	638.15	587.544	646.223	510.859	508.782	479.955	889.243	864.784	845.712	481.537	444.538	482.182	370.741	336.365	328.819	601.173	610.592	626.144	431.021	457.458	413.257	596.713	588.298	607.672
Rv2307B	Rv2307B	129.816	74.0036	87.6457	76.5023	68.2929	62.6315	96.6828	108.949	95.5907	72.782	54.124	64.0773	118.207	81.0998	106.234	57.194	72.2511	62.3463	109.013	68.8943	84.6603	87.9984	78.6564	77.099
Rv3147	nuoC	329.324	290.408	342.734	1989.06	2027.62	1963.33	294.823	288.715	273.496	1621.05	1571.76	1555.48	363.576	292.491	301.839	2253.44	2265.99	2275.3	271.694	276.955	278.374	2050.78	1936.51	2061.78
Rv0214	fadD4	166.712	128.946	166.134	259.223	256.098	270.964	165.912	148.443	136.748	240.401	283.61	237.887	109.252	131.621	141.645	259.915	281.212	272.849	139.201	128.143	120.533	318.47	321.776	330.779
Rv1401	Rv1401	695.543	654.82	722.096	502.639	491.709	512.919	516.835	510.699	589.476	477.126	417.116	491.793	872.225	873.485	886.968	529.998	522.049	526.256	805.02	764.727	954.222	596.713	554.495	613.476
Rv0739	Rv0739	254.167	220.89	215.844	180.824	194.635	187.895	149.202	148.443	114.178	152.181	171.032	150.582	506.858	452.032	392.896	217.337	226.67	265.474	285.111	297.624	198.019	200.301	195.666	208.084
Rv2730	Rv2730	124.35	114.369	85.0294	40.464	35.5123	42.8531	106.232	73.5407	107.54	27.2013	34.6394	24.83	93.1329	86.4179	87.685	24.7841	28.3337	18.7709	142.556	92.3184	100.444	41.0659	44.2036	24.8706
Rv3304	Rv3304	192.675	130.067	133.431	253.533	282.733	269.645	125.329	140.272	139.403	220.551	241.754	227.474	159.401	216.709	182.115	331.725	310.255	345.251	199.578	197.038	183.67	296.68	294.474	286.012
Rv2475c	Rv2475c	634.051	669.396	672.386	680.302	712.295	662.575	724.524	656.419	662.497	547.703	533.302	494.196	737.899	670.071	684.618	816.603	896.763	831.954	575.254	709.612	535.225	622.694	670.204	710.471
Rv2082	Rv2082	754.302	908.226	797.968	1237.95	1291.42	1300.1	660.069	586.964	572.217	1167.45	1208.05	1263.92	1368.34	1388	1369.24	1476.88	1505.94	1471.51	1041.49	985.189	916.914	1525.31	1541.92	1556.07
Rv1857	modA	106.586	126.703	100.727	656.276	692.49	731.14	169.493	175.681	135.42	667.536	596.086	612.739	282.981	252.606	274.859	1007.25	1099.35	1122.23	135.847	177.747	160.711	811.262	753.411	821.56
Rv2508c	Rv2508c	210.439	214.162	194.914	261.752	239.025	255.8	157.557	141.634	193.837	199.232	211.444	219.465	272.235	253.936	345.681	300.586	348.505	322.458	308.591	256.287	297.028	263.157	264.571	272.748
Rv1230c	Rv1230c	598.522	605.484	567.735	936.996	995.027	968.481	427.314	445.33	415.554	980.719	892.685	945.941	764.764	877.474	785.793	1049.19	1013.64	984.803	763.092	745.437	918.349	1168.28	1281.9	1125.81
Rv0726c	Rv0726c	930.579	967.653	985.033	884.519	841.368	856.403	830.756	915.173	840.402	963.81	971.345	945.941	1447.14	1328.18	1320.33	880.152	848.596	955.306	1288.03	1364.11	1221.12	1205.16	1218.85	1235.24
Rv1365c	rsfA	482.371	542.693	586.049	234.565	228.781	254.482	304.372	324.124	394.312	224.963	230.207	210.654	931.329	882.792	792.538	256.102	272.712	296.312	657.433	694.455	769.117	290.814	268.472	288.499
Rv2786c	ribF	1038.53	938.5	981.108	952.802	945.173	959.91	741.234	689.104	751.449	782.223	759.901	820.189	1287.74	1337.48	1263	1046.65	973.973	1031.06	1219.27	1164.31	1135.02	1018.27	953.627	1029.64
Rv3811	csp	925.113	1034.93	1025.59	4882.24	4892.5	5004.59	1906.2	1696.88	1918.45	4572.03	4692.91	4588.74	1008.34	1044.99	1033.67	5850.95	5632.04	5871.95	1061.62	1077.51	1014.49	5917.68	5672.36	5997.97
Rv1871c	Rv1871c	18964.1	18910.2	18503.7	10639.5	10483	10564.3	16025.5	17231.7	16307.5	9499.15	10073.6	9389.73	24108.9	22430.1	22666.6	11553.2	11846.3	12409.6	22344.3	21880.8	25197.2	11988.7	12053.9	12714.7
Rv1642	rpmI	1221.64	1162.75	1203.49	1884.11	1843.22	1720.06	1130.35	1123.54	1217.45	1555.62	1763	1601.13	1144.46	1455.81	1465.35	2195.61	2244.03	1891.84	1328.28	1238.72	1476.53	2042.4	2175.73	2024.47
Rv2900c	fdhF	2929.75	2913.05	2892.31	3241.55	3232.98	3184.32	2942.26	2757.78	2764.17	2862.76	2862.08	2723.29	3571.29	3503.25	3220.74	3995.32	3871.81	3925.8	3101	3195.32	2958.8	3619.67	3444.63	3658.47
Rv0680c	Rv0680c	446.842	463.083	427.763	308.538	294.342	309.202	379.569	313.229	317.308	305.096	325.466	283.542	680.586	728.569	833.008	307.577	335.047	324.469	650.724	737.169	721.765	397.25	375.73	388.811
Rv1298	rpmE	3854.87	3888.55	3657.57	6950.33	7064.22	6943.53	4498.73	4379.76	4437	5728.46	5536.52	5649.22	6256.02	5348.6	5581.49	6887.43	7215.9	7793.95	6062.81	6261.12	4881.6	7318.95	6804.1	7325.23
Rv2579	dhaA	1221.64	1175.09	1227.04	422.976	394.733	421.939	1028.9	1054.08	993.081	369.056	391.136	439.73	1778.48	1697.78	1704.8	406.713	427.131	430.39	1400.4	1318.64	1155.11	543.914	498.59	477.516
Rv2614A	Rv2614A	0	0	1.30814	1.2645	0.682929	3.2964	0	2.72373	0	0	0.721653	2.4029	0	0	1.68625	1.27098	4.95841	0.67039	0	0	1.43492	0	2.60021	1.65804
Rv0107c	ctpI	5568.44	5646.7	5906.27	5035.88	5061.19	4738.24	3689.46	3377.43	3600.58	5764.48	5620.96	5472.2	9583.73	10838.1	10638.6	5325.4	5085.2	4895.19	9215.8	9118.86	12417.8	6913.32	7388.5	7061.6
Rv1315	murA	1988.24	2004.83	2100.88	1581.26	1487.42	1513.7	2842	2768.67	2741.6	1501.96	1407.95	1530.65	2258.47	2189.7	2192.13	1738.7	1702.15	1764.47	2188.65	2178.44	2023.24	1848.8	1899.45	1871.93
Rv0165c	mce1R	166.712	182.766	206.687	828.248	834.539	796.409	170.687	189.299	155.335	751.345	720.21	736.088	288.354	301.798	273.173	894.133	901.722	933.853	268.34	336.204	308.508	967.145	930.225	899.488
Rv2901c	Rv2901c	1288.6	1426.25	1297.68	2376	2336.3	2314.73	1571.99	1639.69	1537.42	1923.94	2096.4	1940.74	1785.64	1535.58	1465.35	2584.53	2688.87	2832.4	1537.92	1652.09	1215.38	2551.95	2356.44	2646.24
Rv0685	tuf	7374.94	7271.42	7622.56	20584.8	20687.3	20778.5	5054.96	5229.56	5030.46	17213.3	16674.5	16412.6	14543.1	13696.6	13508.6	22357.8	23201.1	22836.2	11173	11475	8853.46	21558.8	21016.2	21106.9
Rv1180	pks3	1050.83	984.472	999.423	441.943	463.026	419.301	638.584	604.668	616.029	413.902	386.806	391.672	2559.36	2403.75	2671.02	495.046	530.549	484.022	924.096	953.498	784.901	523.8	482.339	505.703
Rv2561	Rv2561	288.329	335.259	251.164	430.563	432.977	403.479	243.497	236.965	289.427	362.44	414.951	398.08	359.994	406.829	419.876	469.626	435.631	509.496	373.999	321.048	315.682	490.277	482.339	515.651
Rv0280	PPE3	1425.25	1456.53	1479.51	1174.72	1077.66	1104.29	1217.49	1114.01	1279.85	1720.3	1670.63	1625.16	741.481	888.11	836.38	514.111	471.049	505.474	1189.08	1067.86	1607.11	2066.71	2203.03	2076.7
Rv0351	grpE	2254.71	2189.83	2244.78	1781.68	1762.64	1762.25	2006.47	2125.87	2059.18	1871.75	1993.21	1685.23	2108.03	2373.17	2515.89	2125.71	2179.57	1988.38	1631.84	1493.63	1409.09	2347.46	2288.19	2385.09
Rv1171	Rv1171	952.443	908.226	830.672	759.965	760.1	783.223	606.356	627.82	658.514	822.657	756.293	792.156	1454.31	1391.99	1343.94	690.777	689.218	785.027	1197.47	1127.11	1027.4	1041.73	968.578	988.193
Rv2716	Rv2716	449.575	417.111	404.217	778.933	803.807	791.794	391.505	393.579	428.831	623.426	637.22	678.418	557.006	553.074	608.736	886.507	923.68	919.775	395.801	424.389	348.686	864.899	790.464	794.202
Rv1994c	cmtR	874.553	764.704	818.899	216.23	241.074	241.955	1241.36	1143.97	1141.78	260.251	243.197	250.702	816.704	840.247	836.38	267.541	295.379	307.709	840.24	903.894	683.022	327.689	322.426	301.764
Rv0230c	php	1072.69	1030.44	1034.74	832.674	730.734	749.6	674.392	720.427	665.152	755.756	770.004	701.646	1468.63	1485.06	1438.37	663.451	920.139	798.434	1241.07	1614.88	1136.46	898.422	955.577	958.348
Rv3728	Rv3728	142.115	148.007	162.21	323.08	311.416	288.764	151.589	134.825	147.369	297.009	285.775	302.765	116.416	154.223	168.625	385.106	386.047	345.251	98.9504	121.254	206.628	393.898	374.43	349.018
Rv2434c	Rv2434c	199.507	226.496	190.989	296.526	302.537	328.98	269.757	247.859	231.011	316.859	290.826	292.353	238.205	226.016	242.82	373.032	349.922	359.999	258.277	263.176	220.978	379.65	352.979	405.391
Rv3236c	kefB	1739.54	1720.02	1737.22	994.53	1060.59	1095.06	1261.65	1240.66	1257.28	945.431	843.613	888.272	2593.39	2549.99	2605.26	1401.25	1368.52	1419.22	1725.76	1729.25	1706.12	1139.79	1072.59	1167.26
Rv2599	Rv2599	58.759	75.1249	71.948	116.334	111.317	122.626	72.8105	54.4746	63.7272	91.1613	102.475	88.1063	91.3419	89.0769	85.9988	129.64	119.002	128.044	73.7935	81.2953	53.092	129.902	106.609	121.037
Rv1470	trxA	220.005	185.009	213.228	141.624	144.781	147.679	158.751	155.253	200.475	128.655	143.609	137.766	347.457	332.376	355.799	127.098	151.586	143.463	238.152	216.328	152.102	188.568	159.263	170.778
Rv1711	Rv1711	440.009	442.9	460.467	1120.35	1162.34	1247.36	440.444	449.415	434.141	1038.8	1029.08	1014.82	696.706	638.163	612.109	1334.53	1362.15	1384.36	632.276	552.533	487.873	1304.05	1248.1	1335.55
Rv3099c	Rv3099c	1462.14	1426.25	1440.27	1915.09	1863.03	1901.36	1270.01	1383.65	1294.46	1554.15	1675.68	1593.12	1497.29	1391.99	1402.96	2101.56	2047.11	2088.26	1529.54	1475.72	1555.45	2017.26	2023.61	2036.9
Rv3321c	vapB44	159.879	156.977	111.192	214.965	235.61	233.385	128.91	114.397	99.5737	272.749	245.362	288.348	216.713	150.234	168.625	197.637	223.837	246.704	197.901	172.236	136.317	330.204	346.478	338.241
Rv2909c	rpsP	1384.25	1300.67	1275.44	1918.25	2007.13	1960.04	867.758	877.041	847.04	1653.4	1788.26	1738.9	1991.61	1954.37	1993.15	2245.18	2350.99	2390.61	1958.88	1843.61	1731.95	2206.67	2106.17	2212.66
Rv2294	Rv2294	286.963	242.194	223.693	507.697	519.026	493.8	193.366	175.681	191.181	474.921	498.662	458.954	372.532	372.262	327.133	618.331	609.176	561.116	367.29	286.6	276.94	590.847	612.35	600.211
Rv0566c	Rv0566c	132.549	94.1864	126.89	351.531	361.269	361.944	79.9722	54.4746	78.3313	287.452	310.311	259.513	150.445	178.154	180.429	322.828	350.63	342.569	135.847	154.323	116.229	342.775	388.731	346.531
Rv0968	Rv0968	593.056	537.087	540.264	226.346	240.391	262.393	1400.11	1355.06	1302.42	292.598	254.022	281.94	512.231	529.143	532.855	269.447	223.837	246.033	516.554	573.201	576.838	364.565	336.727	342.386
Rv0723	rplO	2849.13	2824.47	2787.66	6442.64	6372.41	6458.3	2221.32	2300.19	2168.05	5766.69	5676.52	5508.24	4946.79	5435.02	5050.32	7544.53	7678.45	7319.32	5118.58	5329.67	5159.97	7244.37	7129.13	6955.49
Rv3303c	lpdA	516.533	533.723	519.333	1114.66	1117.95	1141.21	514.448	531.127	497.868	883.676	891.242	899.485	522.977	571.687	590.188	1328.81	1367.1	1276.42	593.702	538.754	619.885	1091.18	1155.14	1114.2
Rv2899c	fdhD	396.282	374.503	370.205	546.897	547.026	566.321	384.344	439.882	439.452	467.569	420.002	434.124	465.664	482.61	489.013	646.928	609.176	663.016	444.438	432.656	363.035	584.142	555.795	523.112
Rv1436	gap	1734.07	1806.36	1824.86	4993.52	4795.53	4885.92	1711.64	1672.37	1623.71	3740.55	3956.82	3705.27	2134.89	2011.54	2077.46	5639.33	5607.25	5792.84	1876.7	1860.15	1740.56	4785.44	4733.03	4825.73
Rv3718c	Rv3718c	340.256	327.41	320.495	487.465	476.684	507.645	280.499	300.972	297.393	418.313	393.301	418.905	415.516	394.863	441.798	505.214	529.841	500.781	529.971	511.196	408.952	494.467	521.992	529.744
Rv0213c	Rv0213c	367.586	293.772	304.798	168.179	183.025	174.05	304.372	318.676	290.755	170.56	171.753	165.8	372.532	277.867	333.878	192.553	200.461	232.625	387.416	362.384	327.162	224.605	217.118	197.307
Rv3212	Rv3212	7357.18	7425.03	7342.62	5518.28	5766.65	5796.38	11243.8	10738.3	10593.3	5143.26	4954.87	4910.72	4771.27	4719.74	4571.42	6749.53	6533.05	6479.99	7503.46	7588.02	8336.88	6094.52	6197.6	6574.14
Rv0855	far	714.674	685.094	677.619	382.512	387.904	402.819	698.264	682.294	617.357	418.313	430.827	360.435	673.422	724.58	652.579	372.397	398.089	347.262	865.396	799.174	833.688	540.562	490.79	493.268
Rv2798c	Rv2798c	161.246	151.371	162.21	246.578	267.708	259.097	162.332	121.206	147.369	240.401	256.187	213.858	259.697	219.368	254.624	278.98	269.171	260.111	241.506	252.153	289.854	300.871	295.124	298.448
Rv1215c	Rv1215c	1255.8	1233.39	1224.42	866.184	851.612	853.766	1018.15	1015.95	1024.95	783.693	800.313	742.496	1228.64	1231.12	1268.06	896.675	876.93	875.529	1343.38	1344.82	1752.04	952.897	983.53	986.535
Rv2022c	Rv2022c	403.114	354.32	393.752	146.05	146.83	127.241	407.022	419.454	416.882	138.212	147.939	145.776	390.442	406.829	404.7	155.059	151.586	171.62	494.752	456.081	352.99	192.758	188.515	160.001
Rv1311	atpC	2616.83	2647.31	2620.21	2362.09	2321.96	2297.59	2363.36	2609.33	2202.57	1291.7	1652.59	1666.01	3376.07	3081.79	3286.5	2737.05	2735.62	2888.04	3325.74	2965.21	2173.9	2024.8	1831.2	1930.79
Rv3509c	ilvX	905.982	895.892	833.288	908.544	945.173	922.991	895.211	860.699	886.87	950.577	915.778	907.495	949.239	1039.67	1021.87	1161.04	1090.14	1073.96	1204.18	1117.47	1508.1	1179.18	1160.99	1139.07
Rv1822	pgsA2	288.329	273.589	252.472	422.976	445.27	445.673	242.304	288.715	273.496	355.088	334.847	359.634	376.114	309.775	288.349	507.756	488.757	541.005	261.631	268.688	196.584	442.506	438.135	435.236
Rv2402	Rv2402	2105.76	2114.71	1968.76	1319.51	1445.76	1401.63	1625.7	1621.98	1617.08	1280.67	1263.61	1290.36	2607.72	2668.32	2588.39	1616.68	1595.19	1622.34	2574.39	2449.88	2436.49	1660.24	1548.43	1603.33
Rv2054	Rv2054	772.066	771.432	780.962	1970.09	1957.27	1931.03	504.899	532.489	517.783	1618.85	1564.54	1581.11	1031.63	1050.31	986.456	2053.9	2034.36	1936.09	949.253	931.451	875.301	1988.76	1939.11	2048.51
Rv0157	pntB	1210.71	1263.67	1325.15	4182.34	4245.77	4038.74	1126.77	1281.52	1254.63	4008.16	4170.43	4064.1	1549.23	1758.94	1787.43	4482.74	4635.4	4400.44	1927.02	1893.22	1922.79	5039.38	5132.82	5171.43
Rv2469c	Rv2469c	613.554	578.574	558.578	441.311	497.172	432.487	607.55	576.069	586.821	434.486	380.311	458.954	637.602	639.492	593.56	474.71	440.59	449.832	796.634	858.423	743.288	548.943	486.239	562.905
Rv1849	ureB	68.3244	84.095	78.4887	143.521	136.586	150.975	108.619	107.587	111.523	122.038	130.619	120.145	111.043	110.349	116.351	160.143	152.294	144.804	114.044	89.5626	100.444	152.531	164.463	149.224
Rv1143	mcr	150.314	180.524	183.14	412.86	400.879	410.731	155.17	171.595	123.471	337.444	387.528	345.216	177.311	210.062	219.213	459.459	499.382	488.714	246.537	213.572	160.711	446.697	433.585	461.765
Rv2503c	scoB	758.401	759.098	765.265	316.758	328.489	336.232	1039.64	1112.64	1036.89	361.704	362.27	310.775	857.897	753.83	725.088	349.519	386.047	400.223	749.675	793.663	651.454	411.497	447.236	436.894
Rv0953c	Rv0953c	241.869	211.919	217.152	142.889	116.098	133.174	177.849	202.918	225.7	137.477	156.599	131.358	232.832	240.64	237.761	127.733	170.002	149.497	259.954	249.398	255.416	195.273	176.814	161.659
Rv3895c	eccB2	628.585	561.755	601.747	409.066	402.928	413.368	444.025	422.178	492.558	363.91	355.775	372.449	619.692	789.726	723.401	492.504	473.174	439.776	610.473	631.072	830.819	445.021	470.638	450.158
Rv0359	Rv0359	68.3244	74.0036	52.3258	107.483	111.317	132.515	54.9063	58.5602	66.3824	105.13	99.5881	116.14	96.7149	86.4179	92.7438	125.191	129.627	115.977	112.367	104.719	97.5746	145.826	111.159	146.737
Rv1216c	Rv1216c	1296.8	1346.64	1257.13	381.879	387.221	452.925	718.556	879.765	775.347	354.353	351.445	344.415	1110.43	997.129	1028.61	338.08	323.005	348.603	888.876	993.456	695.936	418.202	428.385	468.397
Rv1318c	Rv1318c	304.727	284.802	291.716	307.274	371.513	361.944	226.787	209.727	250.926	364.645	326.187	355.629	386.86	388.216	387.838	369.855	374.005	385.474	384.062	354.117	374.514	453.401	456.987	396.272
Rv0513	Rv0513	848.59	864.497	915.701	1490.85	1486.74	1480.08	1240.17	1176.65	1193.56	1276.26	1282.38	1219.87	900.882	973.198	983.084	1773.01	1765.19	1813.4	929.127	931.451	962.831	1602.41	1499.67	1632.34
Rv1428c	Rv1428c	203.607	279.195	295.641	725.824	722.539	736.415	242.304	204.28	225.7	489.624	478.456	514.22	374.323	378.909	300.153	882.694	907.388	951.954	286.788	272.822	241.067	647.836	578.547	629.227
Rv0325	Rv0325	73.7904	81.8525	56.2502	36.0383	30.7318	29.0083	124.136	107.587	136.748	24.2607	31.0311	19.2232	39.4024	30.5786	25.2938	35.5874	36.8339	28.8268	77.1477	82.6732	57.3968	30.1709	27.9523	36.4769
Rv0246	Rv0246	482.371	525.874	485.322	190.307	217.171	218.221	509.673	527.042	519.111	174.236	177.527	181.819	567.752	461.338	483.954	193.824	221.712	217.206	477.981	504.307	340.076	237.177	178.114	255.338
Rv1803c	PE_PGRS32	347.088	394.686	371.513	194.733	222.635	201.08	330.631	335.019	301.376	195.556	204.949	209.853	535.514	523.825	558.149	216.066	197.628	188.38	491.398	567.689	503.657	263.995	242.47	257.826
Rv1521	fadD25	3932.76	3868.37	3830.25	5158.53	5113.77	5267.64	3670.36	3589.88	3491.72	4637.46	4747.03	4632.79	5707.97	5274.15	5274.59	5470.29	5484	5875.97	5158.84	5131.25	4185.66	5882.49	5589.8	6042.73
Rv3602c	panC	295.162	287.044	266.862	791.578	822.246	805.639	220.819	175.681	240.304	794.721	658.869	776.937	496.112	448.043	490.699	885.236	832.304	821.228	370.645	374.785	373.079	879.984	921.125	984.048
Rv0777	purB	1783.27	1841.12	1779.08	1732.37	1731.91	1737.2	1727.16	1636.96	1707.36	1581.35	1589.8	1701.25	2285.34	2125.88	2241.03	1861.98	1862.24	1909.27	2346.3	2386.5	2175.34	1977.03	2012.56	2091.62
Rv3353c	Rv3353c	31.4292	22.4253	22.2385	37.3028	35.5123	34.2825	11.9361	14.9805	13.2765	31.6124	42.5775	36.0435	23.2832	34.5671	43.8425	59.1005	48.8757	46.9273	23.4797	24.802	34.4381	50.2848	45.5037	42.2801
Rv1222	rseA	7254.69	7311.78	7599.01	2520.15	2357.47	2558.66	8155.97	8235.2	8323.03	2700.29	2722.8	2740.91	7201.68	8762.77	8048.47	2897.83	2866.67	2846.48	8838.45	9058.23	10621.3	3432.78	3458.28	3292.04
Rv0440	groEL2	122332	118638	115563	15304.3	16100	15299.2	67774.6	64383.5	63914.3	15904	17384.6	16500.7	174400	181633	195234	18237.3	17881.4	17542.8	153329	147317	145443	20397.2	20278.4	21422.7
Rv1739c	Rv1739c	232.303	242.194	227.617	122.657	127.708	127.9	144.427	201.556	167.284	119.098	119.794	118.543	368.95	344.342	327.133	139.808	152.294	133.408	308.591	338.96	219.543	148.34	135.211	164.146
Rv1704c	cycA	334.79	297.136	325.728	1239.84	1242.93	1220.33	202.914	211.089	233.666	935.138	873.2	877.859	684.168	650.128	605.364	1708.19	1698.61	1591.51	357.228	362.384	328.597	1106.27	1128.49	1114.2
Rv0296c	atsG	318.392	324.046	266.862	684.095	735.514	707.406	218.431	228.793	216.407	619.014	632.168	685.627	519.395	515.848	468.778	774.661	807.512	778.323	424.313	377.541	417.562	836.404	798.915	778.451
Rv0650	Rv0650	77.8899	72.8823	77.1805	53.1091	63.5124	54.7202	42.9701	35.4085	70.3654	64.6951	59.8972	51.2618	66.2676	82.4293	94.43	62.2779	60.9176	58.3239	80.502	78.5395	208.063	66.2083	79.9565	73.7829
Rv1243c	PE_PGRS23	34.1622	48.2145	56.2502	60.6961	64.1953	69.2243	51.3254	42.2178	30.5359	80.8689	67.8354	61.6744	30.4473	41.2147	42.1563	102.949	77.9178	60.3351	41.9281	38.5808	71.746	80.4557	94.2576	87.8762
Rv1873	Rv1873	2.73298	3.3638	3.92443	4.42576	6.82929	8.57063	9.54891	8.17119	2.6553	9.55723	5.05157	8.00966	3.58203	9.30654	1.68625	3.81293	2.12503	7.37429	13.417	0	2.86984	14.2474	7.15058	7.46119
Rv0853c	pdc	1728.61	1810.85	1650.88	716.972	756.685	756.193	1018.15	864.784	971.839	664.595	676.911	649.584	2002.36	2080.68	2176.95	817.874	854.971	792.401	1455.74	1365.49	1538.23	859.87	808.665	814.928
Rv1437	pgk	1597.43	1575.38	1603.79	3782.76	3929.57	3845.57	1677.03	1658.75	1554.68	3241.37	3334.04	3070.9	1842.96	1870.61	1856.56	4788.41	4908.11	4964.91	1928.69	1872.55	2083.5	3962.44	3969.22	4087.9
Rv2862c	Rv2862c	412.68	364.412	361.048	211.804	211.708	187.895	293.629	309.143	288.1	194.085	187.63	162.596	488.948	543.768	495.758	223.692	230.212	214.525	508.169	577.335	490.743	218.739	240.519	218.033
Rv2184c	Rv2184c	1098.66	1133.6	1104.07	1193.06	1123.42	1140.55	761.526	857.975	752.777	1165.98	1068.77	1051.67	1642.36	1675.18	1777.31	1403.16	1394.02	1292.51	1380.27	1446.78	1318.69	1310.76	1405.41	1372.86
Rv1306	atpF	14047.5	14106.7	13935.7	8579.64	8711.44	8494.81	13717	13338.1	12460	5132.97	5055.9	5062.91	18601.5	16493.8	16690.5	10050.3	10525.3	10490.3	16231.2	17568.1	14072.3	6324.15	6178.75	6470.51
Rv1882c	Rv1882c	803.495	781.523	796.66	915.499	941.759	1063.42	1095.74	1045.91	1071.41	1057.91	996.603	1104.53	963.567	864.179	883.595	1189.64	1144.68	1292.51	949.253	1004.48	878.171	1288.13	1350.16	1287.47
Rv1375	Rv1375	1136.92	1219.94	1157.71	712.547	656.295	642.797	914.309	977.819	938.648	552.849	591.756	567.084	1105.06	1071.58	981.398	775.932	733.844	772.96	1128.71	1149.16	970.006	735.834	712.458	680.626
Rv2211c	gcvT	340.256	347.593	345.35	885.151	801.075	783.883	334.212	385.408	342.533	718.998	696.395	744.899	318.801	353.648	386.151	982.466	1006.56	943.239	390.77	374.785	436.216	910.993	935.426	835.653
Rv1866	Rv1866	396.282	357.684	398.984	389.466	378.343	323.047	270.95	260.116	276.151	335.238	334.847	366.042	372.532	485.269	531.169	488.056	480.257	426.368	427.667	427.145	506.527	377.974	438.135	470.884
Rv1788	PE18	31.4292	24.6679	30.0873	39.8318	37.5611	39.5567	59.6807	40.856	46.4677	38.9641	50.5157	36.8444	34.0293	21.2721	32.0388	43.2133	47.459	43.5753	57.0222	37.2029	78.9206	50.2848	47.4538	60.5185
Rv0871	cspB	457.774	464.204	484.014	1062.81	1165.08	1130	325.857	321.4	308.015	1084.38	990.83	1038.05	1020.88	963.891	972.966	1294.49	1268.64	1303.91	724.518	810.197	820.774	1280.59	1291	1294.93
Rv3046c	Rv3046c	946.977	955.319	937.94	402.744	387.221	398.205	587.258	584.24	594.787	380.084	334.847	381.26	1244.76	1228.46	1220.85	394.639	412.964	385.474	838.562	932.829	961.396	487.763	438.786	436.065
Rv0969	ctpV	3155.22	3240.46	3405.1	1059.02	1080.39	1003.42	9293.48	8575.66	9130.24	1177.74	1079.59	985.989	2036.39	2391.78	2488.91	1141.34	1087.31	1023.02	2857.82	2863.25	3715.01	1383.67	1313.76	1333.89
Rv0883c	Rv0883c	427.711	491.115	436.92	2123.73	2224.98	2248.8	317.501	276.459	339.878	1957.03	1969.39	1840.62	569.543	603.595	541.286	2229.93	2171.07	1980.33	311.945	355.495	375.949	2448.87	2404.54	2308.82
Rv2701c	suhB	147.581	200.707	181.832	245.313	251.318	252.504	136.072	151.167	165.956	237.46	229.486	224.271	198.803	207.403	236.075	313.932	287.588	267.486	263.309	250.775	309.943	298.357	280.823	280.209
Rv0687	Rv0687	168.078	190.615	177.908	226.346	233.562	194.487	229.174	243.774	212.424	228.638	235.981	225.072	186.266	190.119	175.37	246.57	236.587	217.877	278.403	197.038	210.933	282.433	291.874	281.867
Rv2257c	Rv2257c	255.533	248.921	252.472	746.056	749.856	760.149	194.559	147.081	185.871	644.01	616.292	571.089	349.248	416.135	418.19	998.989	1062.52	999.551	370.645	418.878	361.6	739.187	757.311	778.451
Rv3106	fprA	210.439	202.949	222.385	770.081	828.393	797.068	180.236	223.346	207.113	730.025	679.076	652.787	257.906	300.468	284.976	821.687	825.22	802.457	216.349	230.107	255.416	868.251	860.67	829.021
Rv2691	ceoB	418.146	377.867	345.35	763.127	821.563	783.883	366.44	373.151	377.052	613.868	585.261	619.147	478.202	425.442	379.406	930.991	946.347	901.675	422.635	445.057	383.124	780.253	712.458	765.186
Rv2572c	aspS	655.915	723.217	706.398	884.519	1013.47	895.96	525.19	484.824	479.281	891.028	858.046	795.359	870.434	975.857	944.3	1131.81	1177.98	1062.57	878.813	821.221	944.177	1030.84	1097.94	1022.18
Rv3299c	atsB	2279.3	2305.32	2119.19	2697.81	2875.81	2869.84	1741.48	1720.04	1595.83	2465.03	2427.64	2461.37	3574.87	3234.69	3332.03	3124.7	3215.17	3275.53	2473.76	2582.16	2115.07	3082.46	3004.54	3020.12
Rv2717c	Rv2717c	129.816	123.339	92.8783	132.773	132.488	125.263	113.393	115.759	119.488	132.331	112.578	136.164	125.371	113.008	101.175	128.369	126.085	149.497	119.076	97.83	91.8349	156.721	165.113	148.395
Rv0360c	Rv0360c	101.12	109.884	102.035	377.454	364.001	354.692	83.553	57.1983	95.5907	324.211	308.146	355.629	139.699	191.449	129.841	410.526	395.964	353.296	135.847	126.766	195.149	398.088	425.134	397.93
Rv1558	Rv1558	306.094	333.016	286.484	554.484	585.27	591.373	232.755	260.116	265.53	478.597	458.25	465.361	521.186	533.132	470.464	611.34	623.342	593.295	390.77	410.61	416.127	595.037	603.899	533.061
Rv2587c	secD	2660.55	2652.92	2546.96	3824.48	3867.43	3777.01	2326.35	2356.03	2272.94	3392.08	3322.49	3195.86	2955.18	3073.82	3122.94	4559	4464.69	4413.18	2638.12	2735.11	2643.12	4140.12	3953.62	4174.12
Rv2904c	rplS	2399.55	2382.69	2363.82	3491.92	3420.11	3603.62	2169.99	2023.73	2031.3	3119.33	3555.59	3396.9	3007.12	2928.9	2927.33	4157.37	4256.44	4354.85	3352.57	3014.82	2641.69	4171.96	4077.13	4208.94
Rv3165c	Rv3165c	162.612	139.037	145.204	87.2506	86.732	98.8919	130.104	151.167	127.454	61.7544	88.0417	73.6889	134.326	171.506	141.645	96.5943	100.585	98.5473	134.17	141.922	103.314	105.598	74.106	99.4825
Rv3508	PE_PGRS54	754.302	742.279	775.73	205.481	249.269	193.169	278.112	235.603	297.393	213.2	181.135	173.81	807.749	1143.37	1180.38	243.392	254.295	207.821	825.145	766.105	2043.33	210.358	237.269	257.826
Rv3745c	Rv3745c	8.19893	3.3638	7.84887	27.1868	25.2684	22.4155	11.9361	2.72373	14.6041	24.2607	28.8661	23.228	10.7461	9.30654	10.1175	20.9711	20.542	27.486	10.0627	5.51155	4.30476	21.7901	33.8027	38.964
Rv2740	ephG	1447.11	1489.04	1435.03	717.605	713.661	733.778	866.564	872.955	900.146	685.915	697.839	657.593	2172.5	2204.32	2109.5	732.083	765.72	691.172	1636.87	1631.42	1980.19	840.594	867.82	814.099
Rv2016	Rv2016	66.958	69.5185	82.4131	37.935	54.6343	41.5346	75.1977	114.397	79.6589	43.3751	54.8456	44.8541	34.0293	59.8277	53.96	52.7456	41.7923	66.3686	110.69	99.2079	45.9174	55.3133	63.0551	58.8605
Rv0120c	fusA2	5676.39	5721.82	5664.27	1606.55	1619.91	1541.39	3318.25	3385.6	3307.17	1553.42	1654.75	1498.61	8926.43	9455.44	9362.06	1788.9	1688.69	1677.99	6309.34	6294.19	6142.89	1929.26	1940.41	1948.2
Rv2162c	PE_PGRS38	2559.43	2541.91	2764.11	2560.62	2527.52	2402.41	1860.84	2068.67	2095.03	2673.82	2622.49	2257.92	2330.11	3047.23	3095.96	3269.59	3235.71	2434.19	3372.7	3366.18	6465.75	3007.03	3328.27	3012.66
Rv1107c	xseB	791.197	845.435	702.474	1008.44	1014.15	949.362	857.015	851.166	853.678	838.831	951.139	985.989	1060.28	914.7	1013.44	1131.81	1175.14	1220.11	1070.01	1000.35	761.942	1163.26	1061.54	1205.4
Rv1887a	Rv1887a	124.35	108.763	74.5642	472.924	453.465	417.983	77.5849	99.4161	84.9695	383.024	342.064	327.595	155.818	146.246	133.214	460.094	531.258	559.776	166.035	147.434	130.578	439.154	426.435	435.236
Rv1907c	Rv1907c	1082.26	1105.57	1045.21	340.151	404.294	373.152	982.345	984.628	942.631	360.969	346.394	309.173	875.807	1051.64	1020.18	554.146	562.425	530.949	1044.85	1150.54	1021.66	429.097	412.783	415.34
Rv2005c	Rv2005c	31639.7	31070.3	29094.4	788.417	776.49	841.899	18866.3	20842	19162	560.201	493.611	507.813	30921.9	31178.2	32585.1	901.123	914.472	1004.24	33349.6	32655.9	26084	610.96	614.95	703.839
Rv1496	Rv1496	579.391	566.24	524.566	376.821	344.196	342.825	843.885	852.528	829.781	343.325	345.672	363.639	537.305	555.733	500.816	383.835	429.965	462.569	702.715	756.46	740.419	424.907	452.437	418.656
Rv0270	fadD2	18215.3	18423.5	18485.4	9716.43	10044.5	10131.8	14356.8	14110.3	13676.1	8986.74	8904.48	9050.12	22378.8	22185.5	21914.5	10332.4	10377.2	10557.3	21879.8	21752.7	19872.2	11092	10816.9	11334.4
Rv0870c	Rv0870c	1443.01	1501.38	1455.97	1322.67	1317.37	1351.52	1338.04	1408.17	1366.15	1114.52	1003.82	1082.11	2100.86	1978.3	2077.46	1405.7	1374.9	1487.6	1579.85	1612.13	1301.47	1356.85	1298.16	1294.1
Rv3606c	folK	1177.91	1197.51	1162.94	620.87	551.806	534.675	1632.86	1564.78	1492.28	572.699	546.291	528.638	664.467	733.887	787.479	656.46	663.718	589.273	836.885	957.631	1001.57	673.816	689.706	669.02
Rv1305	atpE	5931.93	5744.25	5615.87	3218.79	3392.79	3175.09	3984.28	4024.31	3919.22	2016.58	1830.11	1785.35	7147.95	6955.97	7078.88	3619.11	3990.1	3493.4	6435.13	6108.17	6030.97	2268.68	2368.79	2307.17
Rv3712	Rv3712	128.45	145.765	153.053	253.533	284.781	271.623	81.1658	102.14	110.195	291.128	300.929	238.688	170.147	220.698	222.585	340.622	306.004	276.871	253.246	223.218	371.644	319.309	355.579	350.676
Rv1839c	vapB13	56.026	108.763	69.3317	130.244	112	117.352	70.4232	77.6263	86.2972	113.952	138.557	131.358	137.908	97.0539	111.293	134.088	122.543	128.715	110.69	85.429	86.0952	149.178	154.713	169.949
Rv3676	crp	3446.29	3339.13	3299.14	2898.24	2901.76	3098.61	3437.61	3197.66	3239.46	2772.33	2612.38	2817	4755.15	4596.1	4394.37	3092.29	3075.63	3303.68	4134.11	4327.94	3786.75	3440.32	3298.37	3369.97
Rv0390	Rv0390	325.224	263.498	247.239	346.473	365.367	388.975	296.016	305.058	354.482	340.384	347.837	288.348	261.488	301.798	263.055	464.542	411.548	461.228	268.34	314.158	321.422	407.307	384.831	414.511
Rv3331	sugI	424.978	509.055	436.92	1048.9	1026.44	1050.89	275.725	315.953	297.393	1260.08	1092.58	1072.49	684.168	771.113	767.244	1021.87	989.556	904.356	603.765	598.003	794.946	1370.26	1457.42	1393.58
Rv1058	fadD14	588.957	580.816	544.188	407.169	417.952	417.324	589.645	610.116	637.272	335.238	350.002	331.6	539.096	584.982	595.246	456.281	496.549	463.91	566.868	637.962	522.311	381.326	439.436	430.262
Rv3383c	idsB	148.947	156.977	156.977	357.854	314.147	350.736	247.078	239.688	209.769	329.357	348.558	346.818	155.818	166.188	182.115	366.042	393.131	421.005	124.107	126.766	139.187	429.935	388.081	447.671
Rv2606c	snzP	1632.95	1528.29	1408.87	1855.66	1828.88	1762.25	1323.72	1417.7	1405.98	1600.47	1710.32	1642.78	1563.56	1636.62	1620.49	1967.47	2061.28	1994.41	1464.13	1528.08	1632.94	2017.26	1976.16	2104.88
Rv0022c	whiB5	84.7223	76.2461	32.7036	65.1218	62.1465	60.6537	60.8743	57.1983	66.3824	87.4854	82.2685	58.4705	91.3419	98.3834	77.5675	53.3811	41.7923	48.2681	103.982	100.586	76.0508	84.6461	94.2576	102.799
Rv0122	Rv0122	241.869	233.224	218.46	61.9606	51.2197	60.6537	167.106	183.852	144.714	47.051	49.7941	52.8638	277.608	223.357	264.741	58.465	63.0426	50.9496	248.214	254.909	169.321	69.5607	50.0541	66.3217
Rv1002c	Rv1002c	718.773	617.818	657.997	687.889	677.465	679.717	608.743	674.123	605.408	580.05	536.91	544.657	487.157	535.791	575.011	716.196	786.97	734.077	583.639	586.98	596.927	694.769	689.056	658.243
Rv1425	Rv1425	3585.67	3775.31	3645.8	2637.75	2648.4	2676.67	2619.98	2447.27	2404.37	2492.97	2534.45	2559.89	6263.19	6336.42	6124.46	2750.4	2766.79	2930.95	4607.06	4822.6	4228.71	3011.22	3110.5	3198.36
Rv1872c	lldD2	70073.6	72016.7	72264.5	50208.3	48515.9	49411.6	68388.1	68489.6	68057.9	45954.1	43387.2	43663.1	85146.7	88938.6	85808.2	52507.3	50959	51030.1	89885.5	89559.9	93848.1	54123.2	54906	54261.1
Rv1612	trpB	463.24	441.779	414.682	3539.97	3572.4	3464.51	471.478	471.205	452.728	2972.3	2977.54	2986.8	714.616	595.618	635.716	4453.51	4449.82	4719.55	524.94	491.906	394.603	3679.17	3504.43	3786.14
Rv1639c	Rv1639c	4171.89	4272.03	4131.12	1637.53	1548.2	1543.37	1558.86	1639.69	1684.79	1456.37	1447.64	1450.55	6551.54	6942.68	6652.26	1781.28	1855.86	1650.5	3734.96	3567.35	4014.91	1797.68	1822.75	1720.22
Rv0918	Rv0918	218.638	220.89	213.228	71.4443	79.9027	54.7202	213.657	230.155	236.322	65.4303	89.485	85.7034	157.609	144.916	153.449	76.2587	59.5009	64.3574	211.318	170.858	215.238	85.4842	120.26	87.0472
Rv1774	Rv1774	2763.04	2733.65	2655.53	356.589	333.952	320.41	3835.08	3956.22	3936.48	465.364	436.6	409.294	2038.18	2046.11	2166.83	365.406	381.089	329.832	2406.67	2491.22	2668.95	546.428	507.041	560.418
Rv2737c	recA	12447.3	12438.2	12388.1	5242.62	5313.87	5512.23	7978.12	8168.47	7728.24	5710.81	6031.58	5928.75	10887.6	10430	10630.1	6302.14	6460.09	6560.44	17925.1	18419.6	14122.5	7265.32	6985.47	7421.4
Rv1175c	fadH	576.658	606.605	605.671	1745.64	1698.44	1753.68	544.288	505.252	488.575	1740.89	1819.29	1715.67	1008.34	942.619	937.555	1794.62	1733.32	1673.29	1095.16	1114.71	1116.37	2124.53	2170.53	2172.86
Rv2809	Rv2809	392.182	384.595	345.35	514.02	516.977	506.986	374.795	433.073	365.103	417.577	492.167	458.954	508.649	457.35	384.465	596.724	550.383	661.675	399.156	464.348	284.114	552.295	519.392	608.501
Rv3894c	eccC2	2683.78	2760.56	2642.45	2488.54	2666.15	2633.16	2189.09	2146.3	2056.53	2170.96	2216.2	2355.64	4255.46	4058.98	4234.17	2977.27	2962.29	3116.64	3097.65	3042.37	2835.4	2777.4	2752.32	2731.62
Rv1220c	Rv1220c	285.596	299.378	298.257	1320.14	1356.98	1331.74	222.012	226.07	310.67	1276.99	1353.1	1266.33	266.862	307.116	271.486	1415.87	1400.4	1248.27	276.726	294.868	473.524	1578.94	1591.33	1606.64
Rv2588c	yajC	747.469	760.219	707.706	1348.59	1253.17	1343.61	541.901	577.431	527.077	1162.31	1134.44	1167.81	1294.91	1211.18	1153.4	1502.3	1634.86	1533.85	806.697	855.668	727.504	1387.86	1389.81	1468.2
Rv1490	Rv1490	209.073	151.371	179.216	140.36	152.293	162.183	151.589	111.673	142.058	125.714	139.279	143.373	261.488	273.878	229.33	158.237	174.961	180.335	244.86	282.467	223.847	175.159	163.813	161.659
Rv3245c	mtrB	3573.37	3694.57	3700.74	6128.41	6147.04	6517.63	3870.89	3686.57	3801.06	5698.32	5608.69	5665.23	3288.31	3249.31	3271.33	6788.93	6453.72	6423.68	3419.66	3362.04	3426.59	6904.94	6903.56	6980.36
Rv0600c	Rv0600c	1.36649	1.12127	1.30814	0	0.682929	1.31856	0	2.72373	1.32765	0.735172	1.44331	4.00483	1.79102	1.32951	0	1.90647	0	1.34078	0	5.51155	0	4.1904	1.30011	2.48706
RVnc0035	MTS1082	110.686	116.612	81.105	116.334	124.293	127.9	63.2616	69.4551	75.676	108.805	124.846	112.135	148.654	114.337	131.528	136.63	140.252	144.804	139.201	114.365	104.749	136.607	143.662	143.421
Rv2988c	leuC	593.056	622.303	702.474	3147.98	3183.81	2979.28	1301.04	1500.78	1530.78	3185.5	3080.74	2981.2	766.555	725.91	657.638	2395.79	2412.62	2394.63	853.657	715.123	835.123	3797.34	3865.86	3660.96
Rv0382c	pyrE	1642.52	1594.44	1618.17	830.777	842.734	862.337	2196.25	2041.44	2075.12	910.142	946.809	911.5	1651.32	1753.62	1748.64	1108.29	1029.93	1014.97	1767.69	1784.36	1974.45	1091.18	1132.39	1165.6
Rv3580c	cysS1	840.391	909.347	879.073	1034.36	1066.05	1010.02	959.666	889.298	856.334	956.458	959.799	955.553	1002.97	1054.3	962.849	1158.5	1176.56	1184.58	1150.51	1186.36	1411.96	1174.99	1175.3	1164.77
Rv3335c	Rv3335c	349.821	407.02	367.589	807.384	799.71	750.26	459.541	527.042	418.209	691.796	659.591	579.099	419.098	474.633	392.896	972.934	1041.97	980.11	434.375	473.993	373.079	755.948	796.965	811.612
Rv3040c	Rv3040c	456.407	450.749	512.793	495.052	427.513	419.961	501.318	513.423	546.991	399.933	362.27	382.061	462.082	477.292	497.444	476.617	488.049	429.05	442.761	464.348	545.27	464.296	465.438	470.884
Rv1224	tatB	2059.3	2153.95	2104.8	1170.3	1201.27	1166.92	3368.38	3054.66	2968.62	1254.2	1237.64	1180.62	1955.79	1817.43	1785.74	1300.85	1299.81	1448.71	2545.88	2521.53	2347.53	1459.94	1473.67	1563.53
Rv3815c	Rv3815c	840.391	858.89	800.585	543.103	540.197	535.335	711.394	750.388	755.432	460.953	493.611	484.585	748.645	751.171	812.773	643.75	634.676	667.708	903.97	804.686	964.266	582.466	588.948	588.605
Rv1741	vapC34	267.832	281.438	285.176	147.314	146.83	164.16	312.727	314.591	349.172	158.062	140.001	132.159	297.309	273.878	291.721	130.911	150.169	178.994	320.331	323.803	238.197	175.997	181.365	169.12
Rv2180c	Rv2180c	187.209	196.222	211.919	163.121	174.83	139.767	186.204	168.871	143.386	114.687	114.021	136.965	179.102	269.89	224.271	194.46	191.961	205.81	256.6	217.706	205.194	148.34	147.562	150.882
Rv2088	pknJ	297.895	333.016	316.571	324.977	317.562	305.246	418.959	381.322	353.155	312.448	355.775	335.605	376.114	324.399	335.564	382.564	385.339	392.178	395.801	416.122	411.822	414.012	406.933	406.22
Rv2715	Rv2715	2236.94	2177.5	2151.9	2742.07	2862.84	2812.48	2125.83	2050.97	2002.09	2648.82	2574.86	2666.42	2392.8	2330.62	2359.06	3060.52	3072.09	3272.84	2465.37	2419.57	1905.57	3157.05	3134.55	3348.42
Rv2172c	Rv2172c	3216.71	3297.65	3245.51	2524.58	2567.13	2665.47	5097.93	4920.42	4871.14	3874.35	4008.78	3980.8	4004.71	3439.43	3249.4	2308.1	2105.2	2503.91	4238.09	4699.97	3862.8	4841.59	4783.09	4869.67
Rv0456c	echA2	220.005	215.283	198.838	169.443	115.415	133.834	171.88	190.661	193.837	112.481	124.846	126.553	202.385	211.391	232.703	108.033	131.044	129.385	206.286	169.48	215.238	149.178	145.612	150.053
Rv3088	tgs4	3515.98	3493.87	3726.9	640.47	667.221	620.382	3406.58	3361.08	3247.43	676.358	749.076	714.462	2681.15	3120.35	3161.72	889.049	831.596	854.747	2661.6	2511.89	3267.31	885.013	843.118	886.224
Rv2021c	Rv2021c	867.72	897.013	824.131	353.428	374.928	394.249	698.264	683.656	638.599	342.59	329.074	357.231	1096.1	1050.31	1016.81	366.677	388.172	363.351	1034.79	993.456	771.987	408.145	419.284	427.775
Rv1383	carA	431.81	491.115	434.304	259.855	309.367	288.764	636.196	524.318	556.285	272.749	243.197	244.295	467.455	417.465	477.209	316.474	298.921	294.301	841.917	844.645	898.26	328.527	302.274	298.448
Rv1869c	Rv1869c	1732.71	1639.29	1720.21	4326.49	4503.23	4466.62	2540.01	2394.16	2322.06	3978.01	3821.88	3903.91	1878.78	1846.68	1625.55	4584.42	4539.07	4600.89	1566.43	1511.54	1289.99	4717.55	4658.93	4904.49
Rv3914	trxC	2618.19	2738.13	2523.41	687.889	756.685	693.562	1831	1793.58	1844.1	635.923	750.519	786.549	3191.59	2883.7	3111.13	736.532	692.76	698.546	2772.29	2584.92	2024.67	944.516	816.466	892.027
Rv1205	Rv1205	919.647	937.379	888.23	673.979	628.294	661.257	695.877	727.236	747.466	521.237	609.075	587.108	1337.89	1284.3	1239.39	713.654	728.177	778.323	1043.17	1113.33	972.876	713.206	711.158	669.02
Rv1663	pks17	142.115	167.069	160.902	205.481	239.025	212.947	177.849	126.653	123.471	191.88	186.908	225.072	220.295	231.334	276.545	239.579	272.004	252.737	130.816	117.12	103.314	228.796	254.821	251.193
Rv1997	ctpF	35340.1	35706.7	35431.1	845.951	819.515	857.722	32348.1	31065.5	31514.4	593.283	521.755	591.914	27506.4	26586.1	26497.7	1042.2	987.431	1149.05	27848.7	27242.2	26744	717.397	670.204	695.549
Rv0123	Rv0123	370.318	374.503	380.67	99.2634	79.2197	82.4099	286.467	265.564	225.7	76.4578	73.6086	77.6937	394.024	416.135	419.876	79.4361	87.8346	75.0837	337.102	344.472	286.984	93.0269	94.9077	89.5343
Rv0074	Rv0074	403.114	372.261	447.385	806.12	741.661	764.104	311.533	335.019	378.38	671.947	723.096	668.807	641.184	705.967	762.185	817.239	789.095	767.597	602.088	577.335	589.752	838.918	835.968	843.114
Rv0314c	Rv0314c	1709.48	1650.5	1622.1	2112.98	2074.05	2149.91	1039.64	1158.95	1116.55	1919.53	1923.21	1897.49	2425.04	2436.98	2320.28	2140.96	2026.57	2019.89	1818	1697.56	1974.45	2362.55	2321.99	2315.46
Rv0061c	Rv0061c	1091.82	992.321	915.701	1316.98	1406.15	1394.38	1037.25	1063.62	1132.48	992.482	1019.7	979.582	1234.01	1118.11	1237.71	1400.62	1394.73	1434.63	1449.04	1417.85	1008.75	1203.48	1255.9	1187.99
Rv1811	mgtC	487.837	429.445	460.467	426.137	431.611	416.664	375.988	409.921	394.312	385.965	326.909	347.619	848.942	841.577	819.518	458.188	519.216	457.876	556.805	563.556	506.527	455.078	419.934	418.656
Rv1272c	Rv1272c	763.867	843.193	750.875	1421.3	1464.2	1456.35	860.596	818.481	767.381	1311.55	1410.83	1399.29	924.165	882.792	895.399	1511.19	1492.48	1594.86	870.428	902.516	789.206	1640.12	1671.29	1709.44
Rv2121c	hisG	933.312	953.077	919.626	95.4699	130.439	117.352	911.921	1014.59	1011.67	116.157	93.0933	100.121	1097.89	1128.75	1062.34	134.724	138.835	140.112	1162.25	1092.66	1010.18	133.255	116.359	129.327
Rv2888c	amiC	2228.74	2197.68	2184.6	2754.72	2925.67	2830.94	2486.3	2482.68	2584.93	2851.73	2689.6	2680.83	2279.96	2172.41	2379.3	3318.52	3237.84	3199.77	2623.02	2871.52	3155.39	3352.32	3306.82	3354.22
Rv3157	nuoM	1727.24	1811.97	1615.56	8477.85	8313.29	8066.28	1876.36	1907.97	1865.35	6653.3	6203.33	6386.9	2057.88	1865.3	1929.07	9792.89	9612.22	9365.35	1398.72	1358.6	1274.21	7827.67	7713.52	7884.82
Rv3716c	Rv3716c	457.774	405.899	443.461	1219.61	1297.56	1301.42	262.595	281.906	310.67	1187.3	1178.46	1184.63	786.256	761.807	765.558	1359.31	1413.15	1507.71	635.63	602.137	575.403	1437.31	1447.02	1435.04
Rv2520c	Rv2520c	17.7644	12.3339	22.2385	34.1415	36.1952	43.5124	7.16169	23.1517	11.9488	24.2607	33.196	37.6454	26.8653	26.5901	25.2938	35.5874	46.7507	42.2346	26.834	24.802	31.5682	37.7136	39.6532	38.135
Rv1091	PE_PGRS22	289.696	252.285	313.955	127.715	122.244	119.989	176.655	209.727	216.407	167.619	144.331	136.164	329.547	393.534	403.014	162.685	163.627	113.966	414.25	416.122	991.53	186.892	183.315	175.752
Rv3726	Rv3726	1134.19	1078.66	1003.35	2458.82	2460.59	2437.35	751.977	630.544	689.05	2204.04	2224.14	2194.65	1936.09	1918.48	1816.09	3038.91	3011.88	2885.36	1586.56	1587.33	1635.81	2635.76	2652.86	2755.67
Rv0727c	fucA	101.12	95.3077	100.727	39.1995	33.4635	40.216	94.2955	76.2644	99.5737	40.4344	46.9075	52.8638	107.461	107.69	121.41	38.7648	43.209	49.6089	130.816	121.254	156.406	50.2848	62.4051	56.3734
Rv2017	Rv2017	87.4553	99.7927	78.4887	61.3283	64.8782	67.2465	119.361	96.6924	119.488	72.782	60.6189	63.2763	75.2227	39.8852	62.3913	83.2491	70.126	61.6759	107.336	106.097	81.7904	84.6461	74.7561	80.415
Rv0188	Rv0188	14637.8	14936.4	14762.4	1485.79	1522.25	1575.68	16967.2	16893.9	15621.1	1403.44	1400.73	1333.61	13257.1	12422.9	11845.9	1691.04	1789.28	1787.26	10035.9	11447.5	8662.61	1723.93	1592.63	1708.61
Rv1814	erg3	1007.1	1018.11	968.027	326.874	322.342	316.454	1000.25	1066.34	1001.05	288.922	272.785	276.333	836.405	757.818	743.636	408.619	407.298	421.675	774.832	720.635	586.882	328.527	334.127	354.821
Rv3267	Rv3267	1432.08	1517.07	1533.15	5008.69	4708.11	4804.17	2347.84	2206.22	2161.41	4806.55	5078.27	4714.49	1500.87	1599.4	1573.27	5904.33	5685.17	5279.32	1757.63	1733.38	2001.71	5931.93	5964.23	5813.1
Rv0269c	Rv0269c	371.685	400.292	406.833	356.589	340.781	357.989	313.921	328.209	305.359	298.48	316.806	286.746	361.785	412.147	342.309	397.816	364.089	395.53	379.03	347.227	453.435	373.784	368.58	351.505
Rv3479	Rv3479	3024.04	3192.25	3100.3	3154.93	3054.06	3224.53	1567.22	1451.75	1581.23	2468.71	2379.29	2605.54	7246.45	6600.99	6938.92	3486.29	3436.18	3564.46	3037.27	3407.51	2953.07	3017.09	2931.09	3083.96
Rv1438	tpi	951.076	910.469	877.765	2395.6	2524.1	2449.88	1108.87	1064.98	1113.9	1998.2	2144.75	1926.32	1223.26	1160.66	1185.43	2885.12	2848.25	2922.9	1195.79	1251.12	1198.16	2392.72	2483.2	2477.12
Rv2398c	cysW	802.129	847.678	749.567	316.758	344.879	344.803	1445.47	1424.51	1407.31	313.918	295.156	305.969	714.616	662.094	661.01	449.291	463.257	421.005	1410.46	1449.54	1163.72	367.917	354.279	387.982
Rv1591	Rv1591	332.057	327.41	334.885	553.852	540.197	529.401	336.599	317.315	305.359	480.802	444.538	462.158	259.697	280.526	320.388	596.089	619.092	591.284	353.873	361.006	330.032	564.866	546.694	570.367
Rvnt45	serU	1.36649	1.12127	0	2.529	2.73172	5.27423	0	1.36187	0	2.94069	2.88661	0.800966	0	0	0	1.90647	0	4.02234	3.35425	2.75577	0	1.67616	2.60021	4.14511
Rv3302c	glpD2	821.26	879.073	770.497	1404.86	1429.37	1436.57	781.817	828.014	825.798	1230.68	1163.3	1190.24	958.194	1014.41	994.888	1596.35	1668.15	1557.99	789.926	691.699	843.733	1443.17	1476.27	1415.97
Rv0517	Rv0517	299.261	283.681	327.036	412.227	409.757	402.819	219.625	228.793	205.786	357.293	360.105	355.629	429.844	450.702	418.19	479.794	521.341	447.15	290.143	337.582	330.032	440.83	449.836	406.22
Rv2706c	Rv2706c	8.19893	12.3339	11.7733	8.85151	13.6586	18.4598	15.517	14.9805	22.57	10.2924	15.1547	11.2135	30.4473	13.2951	13.49	13.3453	10.6252	16.7597	6.7085	5.51155	12.9143	12.5712	16.2513	15.7514
Rv3886c	mycP2	508.334	524.753	515.409	419.814	420.001	427.872	581.29	527.042	666.48	396.257	381.755	405.289	474.62	554.404	519.365	474.71	461.84	492.737	578.608	552.533	551.009	476.03	495.34	457.62
Rv0158	Rv0158	128.45	161.462	130.814	536.781	563.416	635.545	159.944	171.595	148.697	549.173	539.797	556.672	225.668	203.414	217.526	692.048	735.261	726.032	166.035	170.858	183.67	665.436	659.803	665.704
Rv0220	lipC	4095.37	4116.17	4120.66	12256.8	11963.5	12329.8	3138.01	3124.12	2989.87	10207.9	10821.2	10347.7	6546.17	6159.6	6301.52	13867	13523	14206.9	4855.28	4928.7	4660.62	12562.8	12633.8	12747
Rv1248c	Rv1248c	17256	17165.5	16707.6	9230.86	9627.25	9531.86	11469.4	10999.8	11257.1	9063.2	9126.75	9078.95	22702.9	22101.7	23553.5	10486.2	10591.2	10661.2	19042.1	18985.9	15545.9	11153.2	10792.8	11032.6
Rv1379	pyrR	280.13	294.893	303.49	642.367	646.734	617.744	331.825	313.229	277.479	466.099	451.033	497.4	274.026	307.116	264.741	618.966	730.302	666.368	348.842	392.698	400.343	551.457	596.098	559.589
Rv3318	sdhA	1071.33	1025.96	1140.7	1068.5	1096.78	985.622	1032.48	994.161	1014.32	1086.58	1177.74	1098.12	1325.35	1378.7	1416.45	1171.21	1115.64	1133.63	1334.99	1468.83	1532.49	1373.61	1336.51	1357.11
Rv0006	gyrA	9128.15	9263.91	9188.41	8979.22	9140.32	9022.89	11465.9	11699.8	10828.3	8524.31	8551.59	8510.27	7541.97	7567.54	7556.09	9096.39	9298.43	9419.65	9604.89	9490.88	7596.47	10439.1	10019.3	10455.6
Rv3867	espH	3969.65	4097.11	4089.26	3238.39	3330.64	3461.87	4280.3	3711.08	3836.91	3255.34	3256.1	3396.9	5288.87	4986.97	4976.12	3984.52	3925.64	3951.95	3880.87	4144.68	3555.73	3990.1	3995.22	3983.45
Rv3584	lpqE	2784.9	2673.1	2694.78	1885.37	1827.52	1871.69	2442.13	2253.89	2470.75	1623.26	1643.93	1684.43	3650.09	3458.04	3581.6	1794.62	1761.65	1823.46	4266.61	3977.96	3506.94	1994.63	1987.86	1997.94
Rv2268c	cyp128	62.8585	56.0633	70.6398	139.727	137.269	160.205	65.6488	58.5602	86.2972	114.687	123.403	134.562	46.5664	51.8507	38.7838	202.721	182.044	191.061	45.2824	45.4703	35.873	163.426	144.962	141.763
Rv2399c	cysT	479.638	503.449	452.618	239.623	229.464	236.681	988.313	908.364	922.716	224.227	226.599	207.45	435.217	360.296	399.641	328.548	332.922	307.709	841.917	874.958	773.422	256.453	262.621	276.893
Rv0115a	Rv0115a	20.4973	23.5466	27.471	28.4513	25.9513	32.3047	7.16169	1.36187	9.29354	22.7903	30.3094	28.0338	39.4024	53.1802	48.9013	41.9423	27.6254	38.2122	26.834	16.5346	11.4794	34.3613	33.8027	29.8448
Rv2953	Rv2953	286.963	292.651	285.176	1372.62	1333.08	1339.66	253.046	246.498	245.615	1318.16	1265.06	1245.5	537.305	575.676	546.345	1212.51	1224.73	1289.16	407.541	418.878	368.774	1532.85	1543.87	1544.47
Rv0742	Rv0742	80.6228	58.3059	70.6398	139.727	137.952	141.086	52.519	58.5602	63.7272	142.623	147.939	120.946	116.416	95.7244	133.214	158.237	177.794	174.972	90.5647	84.0511	166.451	168.454	165.763	163.317
Rv3425	PPE57	43.7276	41.4869	17.0059	93.5731	101.073	79.7728	48.9382	39.4941	33.1912	161.738	204.949	195.436	59.1036	51.8507	50.5875	85.791	81.4595	99.2177	73.7935	42.7145	50.2222	235.501	221.018	222.178
Rv3301c	phoY1	606.721	524.753	535.031	824.455	846.832	913.101	473.865	524.318	456.711	776.341	757.014	779.34	845.36	720.592	827.949	871.891	953.431	1022.34	684.267	664.141	467.784	910.155	902.923	974.1
Rv1307	atpH	22970.7	22981.5	23130.6	15043.8	15076.3	14995.3	23484.4	22687.3	21263.6	9132.3	9503.45	9183.08	24300.5	24135.8	24701.9	18315.4	18135	18052.9	24194.2	23871.9	22129.3	11097	11308.3	11087.3
Rv2661c	Rv2661c	51.9266	49.3357	77.1805	71.4443	67.61	58.0166	52.519	40.856	38.5018	44.1103	53.4023	48.8589	42.9844	34.5671	62.3913	60.3715	60.9176	65.0278	50.3137	33.0693	14.3492	62.0179	55.2545	59.6895
Rv3239c	Rv3239c	1135.55	1127.99	1003.35	597.477	654.246	652.686	798.528	894.745	949.269	538.146	492.889	531.842	1259.08	1255.05	1261.32	723.187	769.261	701.898	1048.2	1087.15	997.269	574.085	631.201	674.823
Rv1319c	Rv1319c	860.888	864.497	834.596	1258.81	1289.37	1278.34	564.58	585.602	621.34	1130.69	1138.05	1161.4	1275.2	1247.08	1209.04	1361.22	1364.27	1289.16	1103.55	1102.31	1225.42	1366.07	1426.87	1328.09
Rv2906c	trmD	124.35	104.278	122.966	163.753	172.781	180.642	133.685	133.463	120.816	184.528	160.929	173.009	121.789	124.974	112.979	185.563	228.087	208.491	125.784	133.655	129.143	201.977	207.367	213.887
Rv3768	Rv3768	170.811	190.615	173.983	175.766	165.952	162.183	107.425	138.91	155.335	158.797	163.815	136.164	232.832	219.368	227.644	158.237	143.085	181.005	201.255	170.858	159.276	195.273	177.464	180.727
Rv3596c	clpC1	44811.3	44852.9	44865.4	23177	23740	22880.9	48619.5	47059.2	45588.8	21819.9	22713.3	22297.3	41001.8	38993.1	38849.5	25586.1	25656.9	26234.4	43400.6	42984.6	40572.4	27028.9	26048.3	27230.9
Rv3244c	lpqB	2705.65	2928.75	2983.88	3061.99	3106.64	2968.07	2938.68	2970.23	2967.3	2947.3	3089.4	2935.54	2645.33	2680.28	2520.94	3431.64	3317.17	3199.77	2780.67	2666.21	3212.79	3578.6	3675.4	3523.34
Rv3089	fadD13	6110.94	6087.36	6081.56	1151.33	1083.81	1147.15	6549.36	6136.56	6298.37	1172.6	1172.69	1182.23	4739.03	5068.07	5068.87	1333.26	1438.65	1345.47	4150.88	3953.16	4420.99	1407.14	1432.07	1395.24
Rv3522	ltp4	170.811	177.16	173.983	241.52	231.513	243.933	211.27	198.832	248.27	229.374	222.269	238.688	159.401	172.836	175.37	254.196	244.379	248.044	259.954	267.31	203.759	286.623	274.972	266.116
Rv0505c	serB1	2812.23	2812.14	2887.08	1886.64	1894.44	1729.29	2175.96	2087.74	2189.29	1653.4	1745.68	1659.6	3363.53	3497.93	3654.1	2103.47	2074.03	1978.99	2623.02	2613.85	3009.03	2080.12	2015.16	1972.24
Rv0175	Rv0175	3022.67	3055.45	3046.67	6064.55	6020.02	6050.86	2579.4	2422.76	2503.95	5334.41	5149.72	5412.13	4919.92	4429.91	4482.05	6422.25	6452.3	6380.1	4494.69	4400.97	4541.52	6322.48	6302.91	6425.74
Rv3137	Rv3137	479.638	409.262	489.246	265.545	262.245	244.593	747.203	675.485	698.343	995.422	969.18	976.378	444.172	462.668	462.033	287.241	293.254	243.352	818.437	828.11	859.517	1212.7	1168.14	1144.88
Rv1636	TB15.3	3107.4	3068.91	3174.87	1253.75	1380.2	1349.54	3790.92	3815.95	3856.82	1510.04	1562.38	1568.29	3005.33	3129.66	2993.09	1291.95	1313.98	1265.7	3609.17	3853.95	3581.56	1860.54	1871.5	1827.16
Rv0916c	PE7	321.125	398.05	378.054	130.244	108.586	144.382	463.122	458.949	404.933	106.6	142.166	120.145	370.741	339.024	311.956	123.285	131.044	122.011	355.55	345.85	385.993	149.178	146.262	147.566
Rv0527	ccdA	434.543	441.779	457.851	756.804	784.685	700.814	538.32	699.999	580.183	670.477	571.549	562.278	229.25	350.989	357.485	1117.83	1123.43	917.094	392.447	384.43	497.917	670.464	791.764	699.694
Rv3207c	Rv3207c	1866.62	1995.85	1871.96	4000.25	4063.43	4272.13	1783.26	1788.13	1842.78	3626.6	3511.56	3573.91	2423.25	2188.37	2161.77	4102.72	4011.35	4479.55	2364.75	2302.45	2084.94	4290.13	4145.39	4396.3
Rv0487	Rv0487	1656.18	1524.92	1573.7	671.45	678.831	684.991	1902.62	2335.6	2015.37	606.517	585.982	615.943	1271.62	1192.57	1217.47	740.345	770.678	844.021	1502.7	1741.65	1528.19	698.959	711.158	756.067
Rv0706	rplV	1207.98	1132.48	1254.51	4702.68	4812.6	4453.43	823.594	804.862	885.542	4547.77	4153.11	3967.99	2444.74	3113.7	2910.47	5406.74	5336.66	4551.28	3042.3	3006.55	4795.5	4968.98	5327.18	4878.79
Rv0476	Rv0476	2569	2619.28	2447.54	1739.32	1779.03	1822.25	2630.73	2893.96	2924.81	1892.33	1731.97	1935.94	3646.51	3063.18	2913.84	1654.81	1799.9	1914.63	3526.99	3738.21	2947.33	2219.24	2222.53	2214.32
Rv2910c	Rv2910c	101.12	102.035	86.3375	92.3086	81.9515	86.3656	63.2616	74.9026	78.3313	95.5723	78.6602	77.6937	119.998	105.031	99.4888	74.9877	103.418	101.899	102.305	112.987	90.4	93.0269	97.5079	111.918
Rv1904	Rv1904	1415.68	1376.92	1263.67	1340.37	1379.52	1423.38	877.306	915.173	1040.88	1243.91	1244.85	1334.41	2403.54	2197.67	2069.03	1430.49	1408.19	1555.3	1675.45	1816.05	1538.23	1541.23	1582.23	1449.96
Rv0115	hddA	188.575	149.128	167.443	194.733	231.513	196.465	100.264	106.225	115.505	194.085	188.351	164.198	358.203	301.798	293.408	201.45	201.878	227.262	231.443	173.614	186.54	237.177	201.516	218.033
Rv1874	Rv1874	739.271	750.128	784.887	546.897	516.294	520.83	675.586	652.333	714.275	413.166	422.889	447.74	644.766	565.04	617.168	467.084	476.715	451.172	722.841	688.943	495.047	517.934	511.591	505.703
Rv1156	Rv1156	5243.22	5324.9	5258.74	6960.45	7021.87	7022.64	6258.12	5963.61	5594.71	6268.07	6518.69	6593.55	6143.19	5782.02	5702.9	7486.7	7567.94	8096.3	6752.1	6784.71	5254.68	7785.77	7484.71	7905.55
Rv0840c	pip	69.6909	86.3375	68.0235	94.2054	93.5612	83.0692	112.2	104.864	107.54	86.0151	90.9283	85.7034	87.7598	59.8277	74.195	111.846	94.2097	117.989	85.5334	93.6963	63.1365	122.36	86.457	107.773
Rvnt15	alaV	13.6649	13.4552	7.84887	38.5673	55.3172	42.8531	9.54891	20.428	21.2424	44.8455	31.7527	45.6551	12.5371	13.2951	13.49	41.9423	49.5841	46.9273	26.834	13.7789	18.654	62.0179	36.4029	48.9122
Rv0608	vapB28	1706.74	1604.53	1742.45	1585.05	1628.79	1615.89	1435.92	1387.74	1408.64	1790.14	2110.84	2003.22	1909.22	1941.08	1844.76	1486.41	1502.4	1539.89	2653.21	2350.67	2205.47	2367.58	2325.89	2361.88
Rv3441c	mrsA	1501.77	1545.11	1609.02	2388.64	2439.42	2418.89	1339.24	1178.01	1346.24	2645.15	2561.87	2483.8	1792.81	2091.31	2021.81	3016.03	2918.38	2776.76	2237.28	2239.07	3667.66	3033.01	3130.65	3029.24
Rv2570	Rv2570	225.471	241.072	242.007	130.244	121.561	106.803	225.593	201.556	220.39	108.07	112.578	120.946	300.891	284.514	296.78	116.294	113.335	127.374	286.788	314.158	331.466	115.655	144.312	145.908
Rv2652c	Rv2652c	117.518	86.3375	98.1108	46.1543	38.9269	39.5567	100.264	76.2644	82.3142	52.9324	38.9693	33.6406	55.5215	87.7474	91.0575	51.4746	44.6257	57.6535	105.659	114.365	162.146	61.1799	37.7031	53.0573
Rv0688	Rv0688	722.873	725.46	754.799	579.774	575.709	532.038	687.522	777.625	634.616	501.387	562.889	547.861	752.227	810.998	898.771	615.153	593.592	644.245	1016.34	921.806	799.25	634.427	636.402	653.269
Rv3822	Rv3822	979.773	953.077	913.085	653.747	659.709	671.805	442.831	457.587	487.247	580.05	616.292	597.521	1816.09	1781.54	1691.31	676.16	690.635	685.139	791.603	730.28	642.844	718.235	718.958	702.181
Rvnt21	proT	12.2984	11.2127	5.23258	13.2773	15.7074	15.1634	7.16169	2.72373	5.3106	13.9683	13.7114	11.2135	3.58203	7.97703	1.68625	15.2517	13.4585	15.419	11.7399	6.88943	4.30476	15.0854	13.6511	18.2385
Rv2819c	Rv2819c	442.742	475.417	456.542	151.108	155.025	189.872	489.382	520.232	492.558	143.358	136.392	172.208	573.125	567.699	499.13	183.021	211.795	214.525	563.514	544.265	374.514	173.483	198.266	164.975
Rv3154	nuoJ	685.977	716.49	761.34	3570.95	3599.03	3597.69	899.985	814.395	843.057	3017.88	2807.95	2803.38	920.583	787.067	822.89	4049.97	4042.52	3978.76	674.204	610.404	605.536	3428.59	3416.68	3442.92
Rv1398c	vapB10	31171	30476	29269.7	21833.5	22518.2	22596.8	30051.6	29316.9	32524.7	19874.6	19157.7	21651.7	34301.6	29217.2	28624.1	19531.8	21134.9	22801.3	31880.5	32846.1	26299.2	24632	23667.8	24051.6
Rv1735a	Rv1735a	1358.29	1445.31	1342.16	9.48376	17.0732	9.22991	1260.46	1115.37	1186.92	8.08689	7.93818	11.2135	2179.67	1886.57	1762.13	15.2517	17.0002	28.8268	1558.05	1610.75	1231.16	13.4093	10.4008	9.11923
Rv2396	PE_PGRS41	1954.08	1912.88	2015.85	1284.1	1361.76	1225.6	1231.81	1195.72	1177.62	1670.31	1456.3	1554.68	3188.01	3238.68	3251.09	1597.62	1597.32	1379.66	2814.22	2764.04	4154.09	1776.73	1956.66	1843.74
Rv1799	lppT	254.167	223.132	247.239	125.818	124.976	116.033	90.7147	104.864	122.144	121.303	109.691	103.325	340.293	280.526	281.604	123.285	137.419	124.022	192.869	199.794	198.019	123.198	128.06	148.395
Rv3672c	Rv3672c	580.758	537.087	671.078	1150.06	1119.32	1095.06	544.288	516.147	568.234	1054.24	942.479	968.368	834.614	795.044	811.086	1325.63	1287.77	1159.77	815.083	846.023	968.571	1151.52	1190.9	1188.82
Rv1147	Rv1147	94.2877	97.5502	81.105	111.276	106.537	107.462	53.7126	66.7314	46.4677	97.0427	79.3818	95.315	161.192	150.234	146.704	118.836	98.4598	125.363	107.336	104.719	152.102	113.979	99.4581	111.089
Rv0738	Rv0738	2842.3	2646.19	2866.14	589.89	631.026	568.299	1532.6	1939.3	2121.58	684.445	603.302	576.696	2525.33	3113.7	2846.39	781.652	808.929	727.373	2976.9	2747.51	5952.05	748.406	763.812	712.129
Rv1488	Rv1488	4893.4	5170.16	5101.76	2907.72	2822.54	2805.89	4307.75	4457.38	4113.06	2222.42	2337.43	2338.02	5482.3	5716.87	5861.41	3092.29	3001.96	3009.38	4404.13	4496.04	4469.78	2684.37	2789.38	2732.45
Rv1530	adh	198.141	229.86	194.914	116.966	101.073	104.166	294.823	269.649	272.168	113.216	121.959	118.543	161.192	150.234	133.214	97.2298	99.8765	87.1507	226.412	239.752	231.022	149.178	153.412	116.892
Rv1163	narJ	2282.04	2441	2561.35	643.631	684.295	628.293	2463.62	2459.53	2604.85	694.737	692.787	680.02	2082.95	2515.42	2411.34	817.239	769.261	691.842	2948.39	2859.12	4699.36	829.699	817.116	814.928
Rv2960c	Rv2960c	61.492	60.5484	57.5584	110.644	114.732	114.715	53.7126	93.9687	63.7272	162.473	182.578	144.174	87.7598	90.4064	112.979	137.266	125.377	134.748	82.1791	74.4059	87.5301	205.33	182.665	196.478
Rv1223	htrA	14361.8	14434.1	14091.3	6180.25	6293.19	6230.19	18314.8	17421	16997.9	6247.49	6534.57	6404.53	11664.9	11356.6	11200.1	6531.56	6465.05	6898.31	15089.1	14572.5	14455.4	7579.6	7449.6	7797.77
Rv1775	Rv1775	5214.52	5304.71	5496.82	1017.92	1036.69	910.464	7850.4	7731.31	7272.86	1103.49	1128.67	1042.06	5030.97	5466.93	5104.28	1093.68	1127.68	1054.52	6752.1	6510.52	6923.49	1282.26	1329.36	1282.5
Rv1390	rpoZ	2991.24	3072.27	3072.83	3458.41	3389.38	3568.68	5420.2	4461.47	5116.76	3205.35	3712.91	3791.77	3343.83	2894.33	2949.25	4319.42	4278.4	4958.2	3662.84	4498.8	3060.68	4293.48	4058.93	4390.5
Rv0736	rslA	103.853	122.218	113.809	127.082	160.488	141.745	97.8764	69.4551	80.9866	136.742	118.351	143.373	152.236	144.916	182.115	156.966	154.419	150.838	103.982	136.411	124.838	179.349	146.912	148.395
Rv3358	relK	53.2931	45.9719	44.4769	17.0708	21.8537	22.4155	58.4871	57.1983	53.106	25.731	16.598	28.0338	34.0293	41.2147	30.3525	26.6905	23.3753	27.486	30.1882	24.802	30.1333	15.0854	35.7529	31.5028
Rv3679	Rv3679	9881.08	9858.18	9323.15	4910.06	5104.89	5228.08	7090.07	6956.41	6918.38	4570.56	4755.69	4982.81	12349.1	10931.2	11061.8	5230.07	5250.24	5670.16	9423.76	8730.29	7003.84	5888.35	5495.54	5627.4
Rv2113	Rv2113	148.947	133.431	147.82	304.113	285.464	290.083	142.04	130.739	114.178	237.46	270.62	273.93	159.401	203.414	198.978	297.409	287.588	301.005	184.484	181.881	215.238	324.337	292.524	314.199
Rv0501	galE2	2003.27	1918.49	1894.19	2787.59	2741.28	2781.5	1920.53	1831.71	1854.73	2591.48	2683.83	2698.46	2960.55	2693.58	2620.43	3204.77	3083.42	3129.38	2606.25	2485.71	2412.1	3246.72	3141.05	3087.27
Rv1077	cbs	5564.34	5619.79	5809.47	3668.95	3947.33	3865.35	7585.42	7107.57	7529.1	3389.88	3257.54	3311.19	5810.06	5614.5	5686.04	4956.18	4947.07	4781.89	5675.39	5821.57	5713.85	3932.27	3846.36	4058.89
Rv1801	PPE29	47.8271	69.5185	69.3317	40.464	33.4635	32.3047	77.5849	58.5602	79.6589	24.2607	28.1445	13.6164	62.6856	42.5442	53.96	29.868	48.1674	32.1787	50.3137	39.9587	31.5682	23.4662	25.3521	30.6738
Rv2605c	tesB2	798.03	953.077	837.213	1153.23	1078.34	1188.02	935.794	941.049	920.061	1090.26	1070.21	1046.86	981.477	986.493	967.908	1328.17	1287.77	1420.56	920.742	994.834	879.606	1283.94	1192.2	1338.87
Rv2769c	PE27	77.8899	71.7611	61.4828	63.2251	51.9026	49.4459	39.3893	66.7314	38.5018	54.4027	51.959	53.6647	78.8047	79.7703	85.9988	72.4457	53.8341	65.0278	77.1477	88.1848	120.533	61.1799	64.3552	64.6636
Rv0609	vapC28	1525	1591.08	1556.69	1751.97	1730.54	1717.42	1628.09	1714.59	1741.88	2082.74	1885.68	2021.64	1710.42	1899.86	1863.31	1553.77	1649.73	1672.62	2480.47	2620.74	2653.17	2373.44	2357.74	2380.12
Rv1101c	Rv1101c	2817.7	2800.92	2693.47	1483.89	1504.49	1427.34	3709.75	3517.7	3637.76	1620.32	1485.88	1581.91	2079.37	1836.05	1817.78	1430.49	1489.65	1449.38	2359.71	2186.71	2086.37	1850.48	1801.3	1914.21
Rv3868	eccA1	9794.99	10136.3	9892.19	7822.21	7828.41	7844.1	9763.76	9500.37	9545.8	7257.61	7476.33	7270.37	10669.1	10193.3	10561	9023.31	8825.25	9121.33	8157.54	7834.66	7323.83	8706.82	8550.14	8858.92
Rv2306A	Rv2306A	148.947	155.856	134.739	110.644	112	129.219	139.653	172.957	169.939	111.746	113.3	100.922	139.699	143.587	153.449	141.714	123.252	126.033	140.878	132.277	160.711	129.902	138.461	117.721
Rv2752c	Rv2752c	3893.13	3904.25	3739.99	3106.88	3215.91	3227.83	4927.24	5042.99	4803.43	2712.78	2486.82	2592.73	3191.59	3208.1	3404.54	3580.98	3495.68	3642.23	3327.42	3459.87	2813.88	2985.24	3055.9	3200.85
Rv2994	Rv2994	1288.6	1290.58	1225.73	1328.99	1283.91	1267.79	925.051	930.154	905.457	1213.03	1112.79	1113.34	1671.02	1720.38	1836.33	1414.6	1483.27	1328.04	1480.9	1417.85	1479.4	1348.47	1360.56	1370.37
Rv1360	Rv1360	750.202	811.797	824.131	1864.51	1795.42	1894.11	842.692	821.205	808.538	1578.41	1612.89	1529.85	1336.1	1317.54	1229.28	2262.98	2190.2	2374.52	922.419	855.668	832.254	1871.43	1818.2	1911.72
Rvnt41	serV	77.8899	48.2145	53.6339	98.6311	112	118.67	52.519	80.35	59.7442	91.1613	93.8149	93.7131	78.8047	53.1802	53.96	111.211	121.127	146.815	80.502	108.853	53.092	106.436	102.058	122.695
Rv2296	Rv2296	685.977	667.154	617.444	885.151	943.125	1018.59	689.909	657.781	642.582	846.918	842.891	925.116	983.268	905.393	907.203	1111.47	1112.1	1071.95	744.643	763.349	690.196	1009.89	1037.48	1047.88
Rv2581c	Rv2581c	972.94	997.927	1047.82	1146.9	1214.25	1258.56	1344.01	1359.14	1190.9	1097.61	1013.92	1115.75	870.434	904.064	844.811	1422.86	1336.64	1294.52	992.858	1003.1	850.907	1312.43	1221.45	1290.79
Rv0249c	Rv0249c	584.857	615.575	595.206	1287.89	1233.37	1302.08	675.586	660.505	685.067	1023.36	1022.58	1031.64	585.663	539.779	578.384	1362.49	1348.69	1467.48	456.178	403.721	332.901	1211.03	1198.7	1236.9
Rv1983	PE_PGRS35	486.47	488.872	430.38	242.784	252.001	247.889	648.133	633.267	544.336	283.041	300.929	288.348	505.067	549.086	561.521	264.999	273.421	268.156	654.079	648.985	661.498	343.613	357.529	330.779
Rv1688	mpg	62.8585	89.7013	87.6457	42.3608	30.7318	30.9861	42.9701	54.4746	61.0719	34.5531	32.4744	40.0483	71.6407	101.042	111.293	25.4196	31.8755	36.8714	67.085	66.1386	146.362	46.0944	43.5535	37.3059
Rv1879	Rv1879	162.612	185.009	167.443	168.179	180.293	164.82	130.104	136.187	128.782	153.651	158.042	158.591	179.102	168.847	188.86	189.376	180.628	181.005	191.192	169.48	134.882	223.767	167.064	168.291
Rv0564c	gpdA1	511.067	568.482	507.56	264.913	267.708	259.756	340.18	366.342	335.895	249.958	250.414	238.688	678.795	676.718	735.205	299.315	315.213	283.575	529.971	578.712	486.438	275.728	299.024	299.277
Rv0907	Rv0907	849.956	913.832	809.742	853.538	845.466	902.553	1348.78	1235.21	1299.77	771.195	821.963	832.204	730.735	674.059	677.873	997.718	934.305	1021.67	644.016	679.298	602.666	929.431	954.927	984.048
Rv3061c	fadE22	2086.63	2292.99	2420.07	1818.35	1789.27	1878.29	2880.19	2755.05	2572.98	1454.17	1708.87	1591.52	2093.7	2241.55	2085.89	1842.92	1726.94	1865.02	2186.97	2106.79	2021.8	1859.7	1847.45	1916.7
Rv3918c	parA	575.292	645.85	609.595	2291.28	2416.88	2420.21	754.364	770.816	697.016	1948.94	1884.24	1943.95	927.747	864.179	880.223	2407.87	2455.83	2596.42	1014.66	1029.28	749.028	2281.25	2178.98	2371
Rv3087	Rv3087	3420.32	3345.86	3423.41	693.579	674.051	677.08	3047.3	2947.08	2989.87	772.665	687.735	736.088	2344.44	2911.62	2986.35	1007.25	957.681	819.217	2431.83	2456.77	3595.91	860.708	871.071	865.498
Rv3778c	Rv3778c	3472.25	3389.59	3322.69	2611.83	2719.42	2726.78	2448.1	2477.23	2307.45	2527.52	2325.17	2458.97	4705	5110.62	5052.01	2711	2864.54	2731.84	3961.37	3887.02	4534.35	2753.93	3006.49	2877.53
Rv1640c	lysX	1003	937.379	1083.14	672.715	667.221	609.833	569.354	670.038	589.476	633.718	636.498	619.147	1103.27	1161.99	1230.96	698.402	684.968	634.859	950.93	959.009	858.082	768.52	750.161	714.616
Rv2081c	Rv2081c	404.481	376.746	337.501	502.639	477.367	517.534	274.531	303.696	337.223	538.146	443.817	460.556	555.215	598.277	482.268	587.192	546.133	527.597	380.707	398.209	371.644	575.761	579.197	549.641
Rv1892	Rv1892	440.009	476.538	421.223	481.143	441.172	460.177	478.639	445.33	428.831	416.107	384.641	406.09	501.485	409.488	446.856	458.823	502.924	489.385	555.128	519.463	396.038	495.305	425.784	508.19
Rv3628	ppa	233.67	224.253	256.396	263.016	291.611	274.919	152.783	157.976	164.628	264.662	270.62	221.067	229.25	194.108	198.978	263.092	308.838	320.446	212.995	231.485	202.324	316.794	289.923	289.328
Rv2148c	Rv2148c	318.392	306.106	375.438	843.422	798.344	809.595	378.376	384.046	431.486	812.365	831.344	693.637	317.01	252.606	222.585	842.023	824.512	817.205	311.945	245.264	269.765	944.516	914.624	903.633
Rv1421	Rv1421	855.422	901.499	913.085	811.178	823.612	903.212	1111.25	1060.89	1039.55	777.812	736.808	789.753	1002.97	967.88	947.673	943.701	1005.14	1040.45	1002.92	1047.19	850.907	933.621	884.072	903.633
Rv1027c	kdpE	248.701	229.86	228.925	94.8376	113.366	97.5733	249.465	239.688	250.926	104.394	93.8149	92.1111	225.668	219.368	202.35	113.117	123.252	107.933	202.932	208.061	175.06	119.845	102.708	122.695
Rv2146c	Rv2146c	893.684	956.441	926.166	959.124	992.978	1004.74	927.438	1000.97	961.218	889.558	933.098	853.83	1028.04	969.209	949.359	1060	1051.89	1122.9	796.634	796.419	606.971	991.449	1074.54	1092.65
Rv0639	nusG	4681.59	4757.54	4742.02	5825.56	5907.33	5887.36	4834.14	4886.37	4573.75	5157.23	5394.36	5292.79	5507.38	5813.93	5490.43	6501.69	6448.05	6911.05	5968.89	6252.85	5481.39	6119.66	6234	6342.01
Rv2083	Rv2083	718.773	664.911	733.869	837.732	865.954	750.26	338.986	345.914	391.656	869.708	892.685	812.18	1160.58	1450.49	1453.55	1055.55	1044.81	858.099	1076.71	1021.01	1908.44	1009.05	1049.18	981.561
Rv0076c	Rv0076c	84.7223	94.1864	90.262	50.5801	36.8782	47.4681	112.2	92.6068	106.212	36.7586	43.2992	50.4609	100.297	79.7703	102.861	49.5681	48.8757	50.9496	95.5961	103.342	86.0952	49.4467	53.3043	50.5703
Rv1489A	Rv1489A	71.0574	48.2145	66.7154	75.2378	40.2928	63.2908	71.6169	76.2644	75.676	63.2248	54.124	56.8686	66.2676	69.1343	60.705	38.7648	47.459	53.6312	57.0222	60.627	53.092	77.9415	58.5047	70.4668
Rv1615	Rv1615	1753.21	1702.08	1636.49	1873.36	1900.59	1974.54	1445.47	1451.75	1415.27	1557.83	1516.91	1666.01	2502.05	2274.78	2173.58	1945.23	1987.61	2167.37	1823.03	1686.53	1300.04	1904.12	1848.75	1839.6
Rv0344c	lpqJ	4.09947	5.60633	7.84887	67.6508	72.3905	67.9057	7.16169	8.17119	11.9488	66.9006	77.2169	74.4899	23.2832	14.6246	8.43125	76.2587	86.4179	90.5026	6.7085	13.7789	14.3492	77.9415	102.058	76.2699
Rv0533c	fabH	535.664	556.148	576.892	718.237	710.929	653.346	508.48	577.431	473.971	751.345	749.798	708.054	705.661	727.239	682.931	766.4	770.678	764.915	766.446	777.128	837.993	878.308	891.872	834.824
Rv1480	Rv1480	4915.26	5172.4	5321.53	2946.92	2971.42	2990.49	6575.62	6142.01	6583.81	3360.47	3048.26	3051.68	3784.42	4441.88	4478.68	3600.68	3417.76	3272.84	4987.77	4949.37	6589.15	3670.79	3751.45	3736.4
Rv1303	Rv1303	3242.68	3146.27	3359.32	2363.99	2330.84	2398.46	3730.04	3953.49	3852.84	1427.7	1120.73	1115.75	3214.88	2947.51	2762.08	2698.29	2773.17	2993.29	3303.94	3607.31	2529.76	1470.83	1401.51	1450.79
Rv2084	Rv2084	774.799	763.583	796.66	1337.21	1421.86	1439.87	584.871	521.594	586.821	1302.72	1239.8	1205.45	1404.16	1361.41	1391.16	1565.84	1458.48	1580.78	1103.55	1019.64	1225.42	1436.47	1437.27	1546.95
Rv3025c	iscS	1672.58	1742.45	1670.5	1584.42	1629.47	1623.14	1933.66	1852.14	1983.51	1536.51	1567.43	1489	1884.15	1953.04	1967.85	1840.38	1833.19	1761.11	2180.26	2108.17	2422.14	1725.61	1872.15	1811.41
Rv3435c	Rv3435c	710.574	704.156	669.77	927.512	984.1	1012.65	737.654	738.131	702.326	840.301	801.757	804.17	924.165	889.439	932.496	1028.22	1039.14	1038.43	892.23	941.097	733.244	953.735	985.48	941.768
Rv1626	Rv1626	6.83244	6.7276	3.92443	1.2645	1.36586	4.61495	3979.51	4118.28	3712.11	3692.77	3840.64	3802.99	5.37305	6.64753	5.05875	0	2.12503	0	5130.32	5069.25	4937.56	4419.2	4440.51	4494.12
Rv2739c	Rv2739c	136.649	180.524	184.448	492.523	506.05	501.711	116.974	103.502	123.471	517.561	531.858	484.585	182.684	252.606	225.958	682.515	658.051	545.697	219.703	212.195	381.689	595.037	629.251	583.631
Rv2213	pepB	983.872	877.952	968.027	1199.38	1186.25	1106.27	763.913	808.948	797.917	1057.91	1065.88	1057.28	959.985	1116.78	1101.12	1379.01	1313.98	1279.1	1064.97	1043.06	1236.9	1255.44	1264.35	1225.29
Rv1476	Rv1476	761.134	701.913	714.247	1317.61	1356.3	1371.96	404.635	381.322	436.797	980.719	1082.48	1089.31	1212.52	1029.04	1138.22	1520.09	1525.06	1549.27	736.258	646.229	529.485	1260.47	1237.05	1213.69
Rv2911	dacB2	174.911	195.1	187.065	422.343	403.611	381.063	146.815	134.825	134.093	399.933	477.734	399.682	198.803	273.878	202.35	429.591	412.256	378.77	278.403	282.467	364.47	523.8	534.343	445.184
Rv1896c	Rv1896c	337.523	395.807	370.205	666.392	605.075	630.93	313.921	288.715	317.308	535.205	544.126	535.846	564.17	598.277	566.58	767.671	727.469	756.2	404.187	359.628	249.676	624.37	623.4	654.098
Rv1410c	P55	14443.8	14518.2	14848.7	9185.97	9219.54	9353.19	15545.6	15710.5	15402.1	8328.76	7853.75	7806.22	12279.2	12730	12071.9	9930.79	9668.18	9489.37	13816.2	13860.2	13508.3	9383.98	9478.42	9358.82
Rv0109	PE_PGRS1	211.806	242.194	238.082	193.469	217.171	193.169	170.687	168.871	192.509	173.5	145.052	164.198	214.922	305.786	237.761	210.347	185.586	162.905	221.38	267.31	312.813	181.025	204.767	180.727
Rv2416c	eis	220.005	241.072	206.687	195.365	211.025	193.828	220.819	177.042	207.113	158.062	180.413	185.023	248.951	265.901	269.8	182.385	177.794	170.279	202.932	206.683	215.238	207.006	224.918	180.727
Rv0642c	mmaA4	3800.21	3835.85	3473.12	4895.52	4860.4	4955.8	4024.87	4220.42	4152.89	4838.16	4886.31	5050.09	4022.62	3560.42	3512.46	4855.14	4931.49	5448.93	3932.86	4261.8	3184.09	5854.83	5689.26	5830.51
Rv2726c	dapF	1697.18	1754.78	1726.75	1072.3	1087.22	1078.58	1709.26	1657.39	1561.32	1016.01	1045.68	1077.3	1712.21	1874.6	1886.91	1248.74	1228.27	1175.86	1705.64	1697.56	1871.14	1203.48	1278	1202.91
Rv0531	Rv0531	239.136	201.828	218.46	235.83	239.708	233.385	316.308	264.202	300.049	231.579	253.3	255.508	275.817	245.959	266.428	256.102	260.67	260.111	308.591	329.315	297.028	307.575	284.723	278.551
Rv2008c	Rv2008c	103.853	104.278	102.035	30.9803	34.1464	44.831	127.717	142.996	161.973	45.5806	49.0724	48.058	37.6114	47.8622	48.9013	38.1293	31.8755	40.8938	97.2732	71.6501	100.444	57.8275	52.6543	58.0315
Rv1551	plsB1	80.6228	77.3674	78.4887	287.674	346.245	290.083	64.4552	61.2839	86.2972	269.073	279.28	270.727	96.7149	86.4179	84.3125	334.267	330.088	307.039	98.9504	79.9174	88.965	301.709	334.127	325.805
Rv0965c	Rv0965c	194.041	201.828	196.222	192.204	186.44	170.753	132.491	162.062	171.267	185.998	195.568	162.596	239.996	243.299	254.624	179.208	160.794	194.413	254.923	252.153	241.067	205.33	206.067	230.468
Rv3800c	pks13	110302	110270	114018	34947	34882.6	34620.7	130956	128823	128661	35172.1	35534.9	33818.4	93790.2	103978	103942	38397.5	37887.2	35945.6	134309	134281	171266	40563.9	41347.9	40932.1
Rv2036	Rv2036	921.014	888.043	841.137	257.958	252.001	263.052	744.815	709.532	631.961	224.963	253.3	282.741	1051.33	949.267	981.398	268.176	261.379	248.715	897.262	748.193	724.635	303.385	290.574	299.277
Rv0821c	phoY2	2921.55	2970.24	2928.94	2060.51	2192.88	2066.84	3227.53	3239.88	2936.76	2098.18	2167.12	2161.01	2761.75	2881.04	2785.69	1976.37	2072.61	2070.16	2782.35	2555.98	2106.46	2597.21	2416.25	2534.32
Rv2639c	Rv2639c	490.57	494.479	432.996	386.937	388.586	417.983	803.302	836.185	835.091	365.38	295.878	341.212	578.498	577.005	661.01	437.216	442.715	445.139	464.564	508.44	434.781	427.421	371.18	379.692
Rv0416	thiS	45.0941	28.0317	40.5525	24.0255	25.9513	28.349	45.3573	46.3034	33.1912	25.731	18.763	29.6358	32.2383	63.8163	55.6463	26.6905	27.6254	28.8268	72.1164	60.627	35.873	31.009	28.6023	27.3577
Rv0068	Rv0068	247.334	236.587	239.39	128.979	105.854	100.87	177.849	194.747	204.458	109.541	126.289	142.572	377.905	347.001	340.623	132.182	88.543	139.441	377.353	391.32	433.346	151.693	146.912	145.079
Rv2094c	tatA	5073.77	5101.76	4781.27	3597.51	3550.55	3562.08	3953.25	3967.11	3993.57	3086.99	3181.77	3403.31	5586.18	5340.62	5040.2	3331.23	3531.8	3660.33	4838.51	4530.49	3614.56	3770.52	3727.4	3845
Rv3536c	hsaE	543.863	614.454	566.427	381.247	386.538	401.501	948.923	976.457	900.146	374.938	412.786	368.444	359.994	350.989	365.916	413.703	418.631	414.301	540.034	686.188	675.847	455.916	420.584	483.319
Rv0550c	vapB3	337.523	325.167	290.408	92.9409	100.391	81.7506	324.663	292.801	355.81	83.0744	101.753	100.121	243.578	206.073	212.468	89.604	94.9181	111.955	290.143	188.77	198.019	128.226	94.2576	113.576
Rv1444c	Rv1444c	884.118	936.258	845.061	733.411	831.807	800.365	718.556	693.189	693.033	713.116	723.818	707.253	1002.97	1023.72	1212.41	754.325	789.803	746.144	1059.94	1004.48	721.765	846.461	844.418	819.902
Rv0110	Rv0110	173.544	167.069	146.512	357.854	361.952	375.13	138.459	171.595	179.233	322.005	292.991	316.382	162.983	152.893	193.919	383.2	363.38	400.223	164.358	161.213	175.06	352.832	359.479	378.034
Rv0585c	Rv0585c	262.366	276.953	264.245	269.339	248.586	282.171	251.853	230.155	242.96	218.346	194.846	252.304	351.039	337.694	315.329	283.428	284.754	297.653	335.425	297.624	258.286	238.015	276.922	260.313
Rv3280	accD5	2261.54	2157.32	2066.87	4428.92	4211.62	4133.68	1799.97	1845.33	1687.44	4146.37	4278.68	4132.18	2419.66	2312.01	2512.51	4493.54	4459.73	4280.44	2254.06	1974.51	1882.61	4889.36	4947.55	4858.06
Rv1500	Rv1500	297.895	234.345	259.013	424.872	437.757	438.421	186.204	159.338	172.594	399.933	448.868	406.09	358.203	293.821	372.661	435.31	483.799	457.876	276.726	270.066	258.286	491.953	462.187	517.309
Rv0488	Rv0488	36.8952	33.638	37.9362	42.9931	53.2684	44.831	77.5849	54.4746	67.7101	46.3158	37.526	56.8686	46.5664	41.2147	23.6075	57.8295	56.6675	74.4133	35.2196	34.4472	37.3079	56.9895	53.3043	53.8864
Rv1535	Rv1535	358.02	328.531	340.118	268.707	256.098	264.371	64.4552	80.35	65.0548	224.227	228.764	206.649	639.393	622.209	650.893	365.406	403.756	376.759	207.963	223.218	231.022	235.501	282.123	250.364
Rv2822c	Rv2822c	300.628	326.289	273.402	81.5603	94.9271	90.3212	354.503	367.704	361.121	76.4578	78.6602	72.8879	286.563	297.809	317.015	80.0716	94.2097	79.7764	365.613	315.536	186.54	104.76	87.7571	74.6119
Rv1308	atpA	21563.2	21744.7	21583.1	15010.3	15346.8	14961	19025	18615.3	17712.2	9293.3	9431.29	9058.93	29791.8	27508.8	27929.4	17591	17768.1	17926.2	23969.5	24429.9	22287.2	10967.1	10538.7	10957.2
Rv1448c	tal	4368.67	4316.88	4336.5	2861.57	2968.69	2907.42	3445.96	3497.27	3418.7	2585.6	2760.32	2661.61	4862.61	4643.96	4952.52	3108.18	3026.04	3002.01	4897.2	4884.61	4111.05	3034.69	3152.76	3166.03
Rv3592	TB11.2	1509.97	1565.29	1420.65	1913.82	2080.88	1897.41	1206.74	1222.95	1261.27	1673.99	1802.69	1728.49	1789.23	1745.64	1620.49	1907.1	2021.61	2067.48	1261.2	1220.81	1147.94	2065.87	1958.61	2058.46
Rv2923c	Rv2923c	285.596	271.347	221.076	329.403	327.123	317.772	251.853	249.221	241.632	249.958	262.682	254.707	232.832	245.959	247.879	303.128	364.089	333.854	234.797	195.66	195.149	289.976	302.274	303.422
Rv0696	Rv0696	1280.4	1273.76	1322.53	1798.12	1814.54	1798.51	694.684	757.197	710.292	1651.93	1570.32	1628.36	2122.36	2310.68	2514.2	2025.94	1955.74	1901.23	1480.9	1470.21	1493.75	1860.54	1801.3	2000.43
Rv0294	tam	39.6282	53.8208	44.4769	54.3736	52.5855	48.1274	41.7765	49.0271	43.8124	52.9324	53.4023	48.8589	91.3419	86.4179	64.0775	50.2036	51.7091	56.9831	65.4079	73.028	55.9619	46.9325	65.6553	67.9797
Rv3443c	rplM	1460.78	1429.62	1582.86	2545.44	2676.4	2614.7	959.666	939.687	973.167	2378.28	2431.97	2496.61	2116.98	2137.84	2192.13	2749.13	2618.75	2610.5	2456.99	2376.85	2535.5	2795	2940.19	2778.88
Rv1094	desA2	16705.3	16843.7	17408.8	35846.1	35450.8	39160.5	21393.1	20233.2	19973.2	37507.7	35666.3	38683.5	34109.9	30525.4	29438.6	39661.5	39403.7	43558.6	25430.2	28340.4	22545.5	43772.9	41887.4	44761.3
Rv1146	Rv1146	258.266	242.194	238.082	192.204	193.269	193.828	204.108	201.556	195.164	152.916	167.424	200.242	299.1	376.25	338.936	218.608	202.586	216.536	327.039	365.14	312.813	219.577	181.365	207.255
Rv1617	pykA	1568.73	1573.14	1582.86	2887.49	2931.13	2853.36	1391.75	1251.55	1398.01	2406.22	2463.72	2559.09	1887.73	1919.81	1848.13	3354.75	3263.34	3378.1	1816.33	1625.91	1739.12	2883.83	2898.58	2871.73
Rv1991A	mazE6	341.622	377.867	349.275	158.063	157.074	155.59	519.222	450.777	464.677	157.327	169.588	181.819	257.906	260.583	242.82	135.359	147.335	155.53	338.779	253.531	226.717	203.653	188.515	201.452
Rv3697c	vapC48	789.831	801.706	800.585	682.831	690.441	703.451	876.113	898.831	817.832	685.915	649.488	626.356	1162.37	1072.91	966.221	729.541	740.219	797.094	865.396	982.433	747.593	771.034	718.958	798.347
Rv3145	nuoA	187.209	176.039	209.303	2632.06	2387.52	2293.63	230.368	245.136	192.509	1796.02	1762.28	1702.85	173.729	122.314	180.429	2323.35	2401.29	2466.36	164.358	183.259	177.93	2008.04	2032.71	2086.65
Rv0194	Rv0194	183.11	182.766	141.28	85.3538	92.1954	88.3434	176.655	190.661	196.492	74.2523	89.485	94.514	157.609	144.916	160.194	85.791	89.2513	91.8434	234.797	187.393	199.454	107.274	98.1579	95.3374
Rv0955	Rv0955	938.778	938.5	954.946	1512.98	1565.27	1536.12	680.36	758.559	740.828	1455.64	1328.56	1412.1	917.001	1048.98	1006.69	1656.08	1671.69	1515.75	875.459	902.516	1086.23	1594.03	1690.14	1598.35
Rv1328	glgP	2518.44	2432.03	2392.6	3001.29	2978.94	3008.95	2382.45	2450	2485.36	2853.2	2732.9	2639.18	2541.45	2670.98	2853.14	3681.39	3579.97	3362.68	2628.05	2538.07	2928.67	3057.32	3333.47	3181.78
Rv1454c	qor	1253.07	1264.79	1264.98	1250.59	1335.81	1284.28	888.049	930.154	916.078	1166.72	1201.55	1243.1	1221.47	1301.59	1274.81	1385.37	1292.02	1328.71	1220.95	1183.6	1183.81	1418.03	1435.32	1345.5
Rv2765	Rv2765	127.083	112.127	115.117	95.4699	89.4637	110.759	78.7785	51.7509	66.3824	90.4261	86.5984	98.5188	111.043	136.939	104.548	89.604	87.8346	75.0837	77.1477	78.5395	60.2666	113.979	97.5079	110.26
Rv3607c	folB	890.951	890.286	931.399	445.737	478.05	414.687	1142.29	1165.76	1137.8	422.724	446.703	450.944	603.573	590.3	585.129	529.998	497.966	503.463	729.549	738.547	744.723	542.238	503.141	492.439
Rv0418	lpqL	640.883	593.15	643.607	1621.72	1690.93	1661.38	756.751	712.255	740.828	1558.56	1620.83	1513.83	662.676	573.017	575.011	1902.02	1924.57	2062.79	605.442	596.625	629.93	1782.6	1767.49	1916.7
Rv1382	Rv1382	116.152	163.705	179.216	80.2958	81.2685	75.1578	163.525	178.404	154.007	80.1337	62.7838	69.6841	155.818	132.951	146.704	83.8846	94.2097	79.7764	236.475	223.218	338.641	77.1034	87.1071	82.9021
Rv0820	phoT	573.925	574.089	593.898	768.185	713.661	719.273	873.726	946.496	894.835	685.18	738.973	714.462	372.532	347.001	359.171	694.59	723.219	745.474	439.407	490.528	375.949	867.413	792.414	830.679
Rv3829c	Rv3829c	161.246	182.766	177.908	142.889	143.415	176.687	127.717	164.786	155.335	140.418	159.485	157.79	293.727	347.001	342.309	189.376	175.669	203.128	286.788	327.937	246.806	176.835	178.764	176.581
Rv3109	moaA1	6.83244	6.7276	2.61629	32.877	28.683	27.0304	22.6787	20.428	21.2424	73.5172	86.5984	76.8928	3.58203	2.65901	13.49	21.6066	23.3753	21.4525	26.834	15.1568	21.5238	94.7031	91.6574	89.5343
Rv2511	orn	207.706	200.707	207.995	422.976	393.367	388.315	174.268	182.49	185.871	370.526	308.868	341.212	274.026	233.993	241.134	422.6	416.506	374.748	218.026	177.747	182.235	412.335	409.533	363.111
Rv2699c	Rv2699c	471.439	519.147	493.171	354.06	383.123	342.166	417.765	449.415	479.281	308.772	343.507	329.197	716.407	678.048	630.658	352.061	403.756	416.312	394.124	436.79	364.47	357.86	394.582	386.324
Rv1991c	mazF6	444.109	436.173	448.694	265.545	325.757	289.423	688.715	721.788	727.552	310.242	268.455	275.532	390.442	345.671	401.328	270.718	337.172	311.061	425.99	454.703	295.593	309.252	321.776	362.282
Rv2298	Rv2298	884.118	871.224	826.747	1076.09	1073.56	1000.13	655.294	618.287	649.22	830.009	829.901	901.087	918.792	939.96	917.32	1225.86	1258.73	1202.01	593.702	549.777	655.758	978.04	993.28	1000.63
Rv3357	relJ	68.3244	76.2461	57.5584	36.0383	44.3904	38.8975	53.7126	72.1788	55.7613	37.4938	26.7012	29.6358	57.3125	46.5327	62.3913	36.8584	38.9589	34.8603	30.1882	45.4703	33.0032	33.5232	34.4528	41.4511
Rv0001	dnaA	848.59	892.528	865.992	1480.1	1363.13	1497.22	1455.02	1412.25	1403.32	2365.05	2264.55	2528.65	1656.69	1471.76	1369.24	1262.72	1243.14	1366.93	2257.41	2132.97	1744.86	2836.9	2746.47	2721.68
Rv3668c	Rv3668c	634.051	602.12	529.799	327.506	348.294	352.714	652.907	706.808	681.084	353.618	354.332	343.615	707.452	755.159	752.068	325.37	359.13	320.446	741.289	719.257	751.898	416.526	407.583	396.272
Rv3163c	Rv3163c	379.884	445.143	413.374	263.649	240.391	270.964	498.931	458.949	473.971	217.611	226.599	226.673	431.635	514.519	418.19	316.474	295.379	331.843	357.228	366.518	331.466	232.986	299.024	242.074
Rv1605	hisF	1154.68	1240.12	1270.21	790.313	764.197	741.689	1876.36	1982.88	1982.18	719.733	650.931	643.176	682.377	755.159	709.911	943.701	986.723	850.725	895.585	862.557	929.828	745.053	816.466	771.819
Rv3472	Rv3472	91.5548	80.7312	87.6457	85.9861	114.732	108.781	62.0679	53.1127	69.0377	95.5723	106.805	82.4995	116.416	139.598	139.959	99.1363	121.835	113.296	125.784	114.365	101.879	113.141	130.011	86.2182
Rv0468	fadB2	864.987	824.131	783.579	433.092	410.44	400.842	371.214	399.026	378.38	443.308	427.94	462.158	1644.15	1564.83	1618.8	474.075	478.84	493.407	647.37	643.473	655.758	533.019	518.742	492.439
Rv0130	htdZ	97.0207	87.4588	78.4887	147.314	138.635	142.404	50.1318	88.5212	87.6248	144.829	124.846	161.795	155.818	118.326	128.155	166.498	160.086	153.519	115.722	96.4521	120.533	159.235	158.613	182.385
Rv2585c	Rv2585c	1101.39	1178.45	1017.74	1299.28	1324.2	1375.26	766.3	803.5	748.794	1240.97	1250.62	1199.05	1679.97	1602.05	1767.19	1452.09	1484.69	1428.6	1215.92	1364.11	1262.73	1402.95	1459.37	1414.31
Rv3520c	Rv3520c	1915.82	2077.71	1949.14	1895.49	1926.54	1854.55	2505.4	2469.06	2531.83	1875.42	1884.24	1694.04	1943.25	1942.41	1883.54	2118.72	2149.82	2114.41	2181.94	2185.33	2231.3	2060	2122.42	2142.19
Rv1996	Rv1996	47470.5	48667.5	48543.9	6614.61	6464.6	6680.47	57132.3	55314.9	55840.9	5332.93	4880.54	5440.96	31371.5	31202.2	30780.8	6849.94	6926.19	7276.41	31102.3	31669.4	36431.2	6051.78	5756.87	6337.87
Rv3315c	cdd	45.0941	56.0633	68.0235	77.7668	84.6832	54.0609	51.3254	50.389	39.8295	50.7268	59.8972	75.2908	66.2676	82.4293	80.94	73.7167	92.0847	68.3798	82.1791	68.8943	78.9206	66.2083	79.3064	68.8088
Rv1948c	Rv1948c	53.2931	50.457	56.2502	100.528	78.5368	109.44	40.5829	38.1322	63.7272	77.193	92.3716	99.3198	66.2676	81.0998	64.0775	89.604	85.7096	91.8434	48.6366	70.2722	67.4412	93.0269	104.658	113.576
Rv0321	dcd	129.816	167.069	132.123	285.777	321.659	306.565	115.781	102.14	102.229	295.539	324.744	298.76	223.877	204.744	234.389	355.238	359.13	364.692	166.035	179.125	130.578	364.565	352.329	349.018
Rv3735	Rv3735	1664.38	1702.08	1667.88	700.534	723.222	688.947	1233	1303.3	1269.23	625.631	590.312	628.759	1905.64	1766.91	1870.05	814.697	862.763	876.2	1308.16	1355.84	1077.62	703.149	686.456	749.435
Rv3034c	Rv3034c	560.26	586.423	532.415	617.709	622.148	662.575	563.386	551.555	539.025	668.271	644.436	676.016	592.827	675.389	649.206	682.515	716.844	836.647	714.455	694.455	655.758	746.729	769.012	787.57
Rv0305c	PPE6	1602.89	1550.71	1548.84	362.28	424.099	379.085	1190.03	1301.94	1241.35	409.491	414.229	375.653	1617.29	1645.93	1659.27	420.058	366.214	395.53	1464.13	1514.3	1984.49	462.62	455.687	472.542
Rv1714	Rv1714	84.7223	54.9421	66.7154	281.352	288.879	310.52	56.0999	76.2644	83.6419	280.836	254.744	275.532	94.9239	126.303	102.861	276.438	286.171	281.564	70.4392	81.2953	70.3111	317.632	317.226	303.422
Rv0469	umaA	1698.55	1749.18	1427.19	1757.66	1725.08	1732.59	1122	1237.94	1108.59	1617.38	1747.84	1590.72	2722.35	2429.01	2421.46	1637.66	1775.82	1861.67	1806.26	1827.08	1361.74	1920.88	1904.65	1913.38
Rv3826	fadD23	662.747	626.788	575.584	804.223	922.637	871.567	331.825	344.552	342.533	727.085	772.891	795.359	1199.98	1062.27	1126.42	817.239	836.554	868.155	677.558	690.321	513.701	887.527	883.422	885.395
Rv0629c	recD	172.178	186.13	252.472	463.44	462.343	459.517	177.849	167.509	196.492	466.099	410.621	402.085	17.9102	27.9196	23.6075	76.8942	77.2095	81.7876	248.214	224.596	314.247	502.848	499.89	477.516
Rv2854	Rv2854	191.308	178.281	239.39	245.946	185.757	236.681	198.14	205.642	209.769	203.643	210.723	166.601	238.205	206.073	239.448	232.589	229.503	271.508	303.56	238.374	200.889	223.767	244.42	203.939
Rv2256c	Rv2256c	6794.18	6809.45	7023.43	4218.38	4059.33	4205.54	9112.05	9727.8	9249.73	4550.71	4756.42	4281.16	7108.55	8141.89	7771.93	5175.42	5051.91	5029.94	8702.6	8416.13	7430.02	5314.27	5233.57	5173.09
Rv0117	oxyS	333.423	331.895	393.752	224.449	183.025	228.111	267.37	276.459	290.755	177.912	200.62	168.203	519.395	535.791	451.915	226.87	212.503	220.558	343.811	425.767	282.679	206.168	205.417	222.178
Rv2252	Rv2252	241.869	238.83	205.379	190.307	161.854	166.798	299.597	268.287	322.619	227.903	233.816	233.882	231.041	174.165	156.821	170.947	139.544	166.927	234.797	246.642	225.282	276.566	269.772	257.826
Rv3334	Rv3334	938.778	981.108	956.254	104.321	103.122	100.87	947.73	927.43	885.542	116.157	123.403	135.363	934.911	836.259	848.184	146.162	118.293	125.363	830.177	742.681	705.981	139.121	143.662	150.053
Rv1716	Rv1716	65.5915	71.7611	69.3317	335.093	338.733	357.989	70.4232	65.3695	65.0548	374.202	388.971	398.881	103.879	109.019	106.234	397.181	396.672	391.508	102.305	106.097	90.4	442.506	436.185	465.081
Rv2157c	murF	2667.39	2518.37	2685.62	871.874	941.076	842.559	2039.89	1981.51	2153.45	944.696	964.129	902.689	2573.69	2987.4	2922.27	1073.34	1030.64	952.624	2614.64	2506.38	3852.76	1040.06	1082.34	1128.3
Rv2527	vapC17	684.611	678.366	678.927	626.56	610.538	634.886	808.077	755.835	744.811	765.314	760.622	789.753	691.333	628.856	644.148	606.257	657.343	639.552	669.173	675.165	559.619	916.022	849.619	913.581
Rv1786	Rv1786	72.4239	88.5801	111.192	109.379	99.0247	92.9583	81.1658	93.9687	95.5907	101.454	104.64	100.121	148.654	131.621	126.469	100.407	106.252	111.285	145.91	125.388	132.013	124.874	118.96	110.26
Rv0253	nirD	25.9633	37.0018	28.7792	20.232	18.4391	23.0748	26.2595	27.2373	26.553	30.142	21.6496	25.6309	39.4024	49.1917	53.96	24.7841	26.9171	16.7597	33.5425	24.802	24.3936	28.4947	32.5026	28.1867
Rv2118c	Rv2118c	281.497	331.895	304.798	742.262	678.831	731.14	257.821	296.887	309.342	601.37	552.065	571.89	272.235	316.422	323.76	801.352	807.512	719.999	293.497	286.6	209.498	688.902	646.152	659.901
Rv1238	sugC	1009.84	1045.02	935.323	875.035	861.173	849.811	1098.13	1172.57	1116.55	772.665	935.984	898.684	1368.34	1192.57	1210.73	957.046	942.097	983.462	997.889	1054.08	797.815	1045.92	971.179	995.654
Rv2136c	Rv2136c	716.04	695.185	733.869	1399.17	1367.22	1466.9	771.075	723.15	736.845	1415.21	1164.75	1271.13	1395.2	1236.44	1123.04	1592.54	1495.31	1647.82	784.894	913.539	721.765	1502.68	1467.82	1477.32
Rv0545c	pitA	2951.62	2843.53	2884.46	8315.36	8283.24	8126.27	2612.82	2482.68	2563.69	7549.48	7299.52	6934.77	3825.61	3918.05	3846.34	10106.8	9655.43	9231.27	3324.06	3127.8	3659.05	8286.94	8588.5	8271.97
Rv0838	lpqR	232.303	223.132	278.635	271.236	262.245	270.964	279.306	216.537	225.7	282.306	231.651	251.503	306.264	311.104	286.663	338.716	328.671	329.161	249.892	245.264	261.155	309.252	311.375	261.142
Rv2222c	glnA2	4904.33	5024.4	5032.43	5952.01	5727.72	5997.46	5281.74	5237.73	5088.88	5464.53	5459.31	5560.31	6272.14	5944.22	5809.13	6370.78	6431.76	6720.66	4756.33	5027.91	4250.23	6432.27	6118.95	6469.68
Rv2124c	metH	5446.82	5472.9	5481.13	5635.88	5770.07	5682.99	4754.17	4917.69	4883.09	6199.7	6327.45	6394.11	8292.41	8111.31	8237.33	5584.68	5731.92	5756.64	7350.84	7590.78	7445.8	7210.84	7337.79	7271.34
Rv0237	lpqI	229.57	167.069	193.605	1719.09	1845.27	1785.33	176.655	178.404	169.939	1704.86	1626.61	1586.71	297.309	335.035	354.113	2065.34	1978.4	1953.52	268.34	236.997	276.94	1871.43	1937.16	1861.15
Rv3485c	Rv3485c	95.6542	96.4289	88.9538	275.661	286.147	295.357	93.1019	92.6068	79.6589	319.8	292.27	320.387	164.774	174.165	148.39	336.174	342.838	354.636	124.107	133.655	107.619	373.784	351.028	350.676
Rv1990c	Rv1990c	915.548	944.107	988.957	397.053	389.269	374.47	494.156	501.166	479.281	335.973	325.466	343.615	1491.92	1316.21	1310.22	305.035	349.213	328.491	957.638	899.76	708.85	404.793	358.829	397.101
Rv3809c	glf	594.423	562.876	504.944	563.335	562.733	590.714	722.137	721.788	764.726	571.228	581.652	617.545	551.633	517.178	546.345	606.892	620.509	661.675	637.307	573.201	529.485	666.274	677.355	695.549
Rv0977	PE_PGRS16	245.968	255.649	260.321	253.533	266.342	242.615	182.623	155.253	157.99	208.789	241.032	226.673	308.055	327.058	325.446	256.738	268.462	250.055	298.528	319.67	401.778	261.481	267.822	249.535
Rv2872	vapC43	263.732	281.438	222.385	133.405	144.098	149.656	365.246	415.369	408.916	156.592	148.661	165.8	189.848	139.598	136.586	129.64	137.419	162.234	233.12	236.997	190.844	179.349	180.715	182.385
Rv1509	Rv1509	352.554	409.262	361.048	373.66	400.196	359.307	523.997	456.225	438.124	341.12	373.095	349.221	274.026	195.437	229.33	367.948	422.881	410.279	379.03	345.85	252.546	408.145	404.983	412.853
Rv0554	bpoC	131.183	142.401	137.355	328.138	331.22	278.875	211.27	164.786	204.458	280.1	326.187	271.528	171.938	140.928	112.979	367.313	353.464	332.513	164.358	166.724	165.016	326.013	352.329	332.437
Rv3051c	nrdE	61686	61389.4	58963.3	22126.2	21866.7	22004.1	64082.8	64108.4	60149.1	21637.6	22102.1	21959.3	59889.8	55122.6	56504.6	21612.3	22412	23574.3	51393.8	47465.4	38389.8	25725.7	24310.7	25596
Rv3598c	lysS	200.874	210.798	213.228	658.173	685.661	685.65	208.882	234.241	221.717	634.453	619.178	645.579	295.518	285.844	281.604	693.954	750.844	722.68	226.412	231.485	228.152	722.425	710.508	754.409
Rv0005	gyrB	10289.7	10650.9	10112	11383.7	10952.8	11614.5	14133.6	13723.5	12793.2	10090.2	10721.6	10270.8	10273.3	9153.64	8778.62	10886.6	10941.8	12200.4	11330.7	11969.7	9384.38	12127.9	11632.7	12011.7
Rv3872	PE35	1050.83	966.532	1022.97	2636.49	2489.96	2517.13	1571.99	1504.86	1501.57	2964.21	3079.29	2887.48	888.344	1007.77	802.655	2822.84	2898.54	2904.8	940.867	974.166	1003.01	3464.62	3338.67	3476.09
Rv2897c	Rv2897c	43.7276	28.0317	31.3955	46.1543	75.1222	58.6758	22.6787	23.1517	21.2424	63.9599	53.4023	44.0531	26.8653	26.5901	37.0975	81.3426	92.0847	65.6982	41.9281	42.7145	30.1333	61.1799	50.7041	75.4409
Rv2406c	Rv2406c	1939.05	1900.55	1976.61	1619.19	1612.39	1640.29	1624.51	1601.55	1602.47	1396.83	1488.77	1592.32	2172.5	1887.9	1858.25	1387.91	1442.19	1435.98	2247.35	2064.07	1785.04	1717.23	1725.89	1706.13
Rv1254	Rv1254	815.794	811.797	839.829	624.664	674.734	684.991	996.668	968.286	924.044	577.11	568.663	655.991	841.778	724.58	762.185	700.944	711.177	720.669	709.424	764.727	688.762	693.092	689.056	687.258
Rv2388c	hemN	823.993	761.34	913.085	1033.1	1106.34	1039.02	794.947	806.224	914.75	1063.06	1054.34	933.927	893.717	1034.36	908.889	1180.74	1189.31	1063.24	810.051	877.714	1044.62	1228.63	1157.09	1122.49
Rv3026c	Rv3026c	38.2617	45.9719	34.0118	83.4571	82.6344	81.0913	45.3573	43.5797	50.4507	74.9875	66.3921	60.8734	41.1934	41.2147	38.7838	80.7071	97.7514	82.458	31.8654	33.0693	71.746	68.7226	96.8578	65.4927
Rv2830c	vapB22	366.219	394.686	358.432	376.821	387.221	364.581	385.537	329.571	383.691	383.024	360.827	422.109	501.485	523.825	515.993	393.368	359.839	371.396	449.469	399.587	452	467.649	451.137	418.656
Rv0876c	Rv0876c	3267.28	3237.1	3286.06	3701.83	3799.13	3699.87	3455.51	3154.08	3307.17	3217.85	3052.59	3269.54	2989.21	3031.27	2910.47	4126.87	3865.43	4143.68	2700.17	2806.76	2569.94	3595.36	3664.35	3696.61
Rv2653c	Rv2653c	17.7644	17.9403	23.5466	5.05801	15.0244	17.1413	26.2595	10.8949	15.9318	8.08689	11.5465	13.6164	19.7012	18.6131	28.6663	13.3453	9.91681	15.419	16.7712	22.0462	14.3492	11.7331	11.0509	15.7514
Rv2871	vapB43	322.491	337.501	285.176	226.978	191.22	189.872	398.667	463.034	435.469	229.374	158.042	187.426	211.34	186.131	183.801	137.901	167.877	168.268	313.622	310.025	268.33	207.844	252.22	198.136
Rv2779c	Rv2779c	161.246	227.617	163.518	266.81	263.611	295.357	433.282	354.085	406.261	365.38	318.971	379.658	162.983	188.79	168.625	245.934	241.545	263.463	171.067	172.236	162.146	405.631	403.033	412.853
Rv2713	sthA	1408.85	1236.76	1404.95	1404.23	1378.83	1430.64	1175.71	1265.17	1197.54	1265.23	1279.49	1307.18	1402.37	1278.98	1340.57	1408.24	1454.23	1512.4	1490.96	1467.45	1186.68	1465.8	1431.42	1525.4
Rv2317	uspB	17.7644	17.9403	13.0814	29.7158	21.1708	18.4598	7.16169	5.44746	2.6553	27.2013	22.3712	21.6261	16.1192	13.2951	6.745	24.7841	22.667	24.134	20.1255	12.401	8.60952	33.5232	24.0519	24.8706
Rv3820c	papA2	139.382	118.854	96.8027	134.669	155.708	137.789	69.2296	87.1594	74.3483	138.212	135.671	149.781	179.102	131.621	158.508	160.779	150.169	184.357	154.295	150.19	129.143	165.102	157.963	163.317
Rv2137c	Rv2137c	7332.58	6676.02	6602.21	4005.94	3647.52	3675.48	3282.44	4013.42	4235.2	3961.84	3725.17	3374.47	7427.35	7392.05	7040.1	3938.13	4003.56	3751.5	5244.37	5136.76	5688.02	4158.55	4428.16	4106.97
Rv3476c	kgtP	213.172	181.645	221.076	244.681	284.098	284.809	89.5211	76.2644	111.523	203.643	210.001	197.038	345.666	248.618	295.094	284.699	279.796	301.675	206.286	180.503	190.844	234.662	254.821	209.742
Rv0033	acpA	10.9319	13.4552	15.6977	20.8643	21.1708	16.482	7.16169	14.9805	13.2765	23.5255	24.5362	29.6358	34.0293	47.8622	38.7838	14.6162	18.4169	20.1117	18.4484	17.9125	15.7841	31.847	30.5525	26.5287
Rv1828	Rv1828	4192.39	4276.51	4009.46	3332.59	3299.23	3484.29	4828.17	4698.43	4600.3	3494.27	3077.85	3253.52	3952.77	3678.74	3465.24	3371.9	3315.76	3498.77	3511.9	3600.42	3525.6	3762.98	3652.65	3854.12
Rv3179	Rv3179	468.706	436.173	485.322	109.379	103.122	104.166	551.45	615.563	569.561	127.92	129.898	143.373	320.592	280.526	337.25	101.678	114.043	118.659	540.034	461.592	373.079	160.073	151.462	148.395
Rv3148	nuoD	1004.37	938.5	937.94	5932.41	6041.87	6026.47	1096.93	1022.76	1050.17	4851.4	4723.94	4929.95	981.477	842.906	932.496	6540.45	6584.76	6714.63	888.876	983.811	749.028	5467.64	5497.49	5664.7
Rv0228	Rv0228	241.869	259.013	249.856	347.106	390.635	338.21	223.206	223.346	211.096	345.531	358.662	345.216	231.041	321.74	300.153	431.497	425.715	398.212	295.174	316.914	387.428	404.793	415.384	382.179
Rv0436c	pssA	498.768	502.328	515.409	823.19	835.222	814.21	631.422	559.727	572.217	828.538	775.055	794.559	485.366	533.132	554.776	848.378	878.346	846.703	610.473	538.754	500.787	921.888	903.573	925.188
Rv0473	Rv0473	1714.94	1688.63	1614.25	1178.52	1169.86	1168.24	2011.24	2034.63	2022.01	1115.99	1169.8	1156.6	1660.27	1479.74	1527.74	1234.12	1176.56	1371.62	1677.12	1776.1	1726.21	1317.46	1292.3	1338.04
Rv0462	lpdC	2765.77	2664.13	2689.55	4459.26	4586.55	4665.72	3060.43	3017.89	3009.78	3761.87	3783.63	3808.59	1993.4	1963.68	2111.19	4823.36	4820.99	5016.53	2106.47	2070.96	1829.52	4263.31	4293.6	4459.3
Rv0086	hycQ	2082.53	2049.68	2210.76	378.718	378.343	369.856	2067.34	2067.31	2302.14	313.183	290.105	295.557	2786.82	3234.69	3244.35	383.835	356.297	325.139	2738.74	2795.73	3726.49	335.232	352.979	341.557
Rv1625c	cya	6930.83	6947.37	6689.85	2704.14	2687.32	2753.15	7300.14	7324.11	7209.13	2284.18	2238.57	2257.92	4842.91	4678.53	4630.44	3136.77	3152.84	3195.08	4833.47	5310.38	4887.34	2544.41	2509.2	2720.85
Rv3305c	amiA1	802.129	818.525	791.428	1063.45	1057.86	1123.41	899.985	823.928	902.801	940.284	917.221	897.883	746.854	837.588	888.654	1211.88	1071.02	1146.37	801.666	902.516	886.78	1053.47	1073.24	1028.82
Rv3871	eccCb1	10539.7	10408.7	10279.4	9242.24	9123.93	9517.35	13873.4	14035.4	13365.4	8283.18	8164.06	8286	8197.48	7126.15	7009.74	10224.4	10171.1	10907.9	6688.37	6857.74	5693.76	9508.86	9237.9	9585.97
Rv1300	hemK	2347.63	2420.82	2460.62	3408.46	3392.79	3415.07	2898.1	2721.01	2688.49	2701.76	2783.42	2907.51	2265.64	2499.47	2551.3	3835.81	3834.26	3931.17	2599.54	2627.63	2219.82	3105.93	3085.15	3423.03
Rv1890c	Rv1890c	168.078	174.918	130.814	108.115	105.854	90.3212	103.844	119.844	110.195	74.9875	91.65	95.315	241.787	176.824	198.978	94.6879	109.085	108.603	127.461	179.125	147.797	95.5411	96.8578	107.773
Rv1789	PPE26	3361.56	3340.25	3514.98	2245.75	2217.47	2149.25	3327.8	3254.86	3098.73	2106.27	2278.26	2136.18	3393.98	3781.11	3699.63	2365.93	2383.58	2241.78	3944.6	4013.78	5917.61	2451.38	2531.95	2482.92
Rv3455c	truA	446.842	483.266	450.002	1394.75	1465.57	1448.44	681.554	622.372	617.357	1563.71	1473.62	1441.74	594.618	615.561	635.716	1683.41	1678.77	1583.46	726.195	665.519	833.688	1724.77	1750.59	1650.58
Rv0338c	Rv0338c	1638.42	1602.29	1670.5	8075.74	8202.66	8189.56	1949.17	2052.33	1945.01	7559.77	7596.84	7545.1	1927.13	1845.35	1807.66	9102.74	9369.26	9792.39	1992.42	2088.88	1598.5	8749.56	8418.83	8818.3
Rv2134c	Rv2134c	4710.29	4838.27	4668.77	2449.34	2588.3	2671.4	5208.93	5247.27	5215.01	2503.26	2620.32	2470.98	3485.32	3448.74	3389.36	2797.42	2686.04	2852.51	3728.25	4000.01	3119.52	2871.26	2884.93	2936.39
Rv1760	Rv1760	1008.47	903.741	1011.2	297.158	314.147	292.061	1322.52	1235.21	1267.9	405.08	361.548	414.901	811.331	784.408	768.93	342.529	383.922	376.759	1006.27	970.032	856.647	465.973	440.086	446.013
Rv2773c	dapB	1109.59	1189.66	1196.95	1573.67	1608.98	1595.46	1155.42	1069.06	1196.21	1426.97	1420.94	1410.5	1429.23	1338.81	1244.45	1536.61	1555.52	1689.38	1096.84	1062.35	1090.54	1647.67	1551.03	1678.77
Rv2129c	Rv2129c	711.941	763.583	712.939	502.639	551.806	555.772	624.26	567.898	623.995	557.26	547.735	534.244	1019.09	1014.41	1042.1	543.343	500.799	540.334	721.164	737.169	934.133	633.589	627.301	615.134
Rv0037c	Rv0037c	1296.8	1329.82	1312.07	845.951	871.417	843.877	1162.58	1127.62	1204.18	863.827	712.272	774.534	1327.14	1255.05	1369.24	912.562	916.597	827.261	1306.48	1296.59	1512.41	866.575	915.274	906.12
Rv3052c	nrdI	10496	9972.55	9856.87	3546.93	3524.6	3636.58	12836.1	12601.3	12283.4	3777.31	3417.03	3731.7	9125.23	8434.38	8569.52	3285.48	3397.92	3491.39	8278.29	7505.35	6835.96	4146.82	4067.38	4285.21
Rv2190c	Rv2190c	963.375	916.075	862.067	7758.35	7919.93	8212.64	896.404	862.061	951.924	6265.87	6305.81	6419.74	703.87	584.982	576.698	8110.75	8352.08	8283.34	843.594	806.064	703.111	7252.75	7371.6	7095.59
Rv0210	Rv0210	457.774	503.449	533.723	247.21	236.976	217.562	335.406	408.56	386.346	285.982	267.012	241.892	492.53	618.22	546.345	294.231	274.129	238.659	660.787	628.316	803.555	308.414	321.126	279.38
Rv2521	bcp	531.564	521.389	474.857	1101.38	1173.95	1113.52	553.837	546.108	527.077	885.882	827.736	941.936	531.932	574.346	566.58	1258.27	1258.02	1319.33	392.447	410.61	291.289	985.582	1038.78	1008.92
Rv0500	proC	211.806	150.25	160.902	646.16	635.124	640.16	169.493	160.7	176.577	555.055	598.25	553.468	275.817	284.514	251.251	675.525	672.218	663.686	221.38	232.863	216.673	684.712	627.301	643.32
Rv3786c	Rv3786c	285.596	291.529	328.344	443.208	463.026	521.49	405.829	340.466	306.687	441.838	423.61	430.92	327.756	277.867	251.251	570.034	528.424	600.669	335.425	268.688	271.2	502.848	491.44	488.293
Rv1749c	Rv1749c	368.952	356.563	414.682	500.11	514.928	499.734	350.923	355.447	339.878	452.866	442.373	462.958	512.231	478.622	418.19	583.379	629.718	543.016	352.196	376.163	358.73	553.971	497.29	503.216
Rv3038c	Rv3038c	2545.77	2559.85	2582.28	1543.96	1475.13	1472.17	3138.01	3200.38	3238.14	1662.22	1532.79	1536.25	1885.94	2031.48	1979.66	1574.11	1625.65	1571.39	2109.82	2338.27	2016.06	1770.86	1829.25	1807.27
Rv1744c	Rv1744c	21.8638	12.3339	17.0059	18.3353	21.8537	15.1634	27.4531	21.7898	23.8977	18.3793	20.2063	19.2232	3.58203	23.9311	10.1175	15.2517	19.1253	19.4413	15.0941	16.5346	11.4794	19.2758	22.1018	24.8706
RVnc0004	B11	71.0574	85.2163	85.0294	222.552	252.684	256.46	76.3913	81.7119	82.3142	260.986	188.351	253.906	128.953	107.69	94.43	256.102	216.753	254.078	103.982	101.964	86.0952	275.728	247.67	281.038
Rv1726	Rv1726	25.9633	33.638	37.9362	17.0708	6.82929	15.1634	17.9042	21.7898	10.6212	8.82206	10.1031	14.4174	30.4473	30.5786	35.4113	13.3453	14.8752	12.067	28.5111	31.6914	44.4825	13.4093	13.0011	11.6063
Rv0099	fadD10	2452.85	2463.42	2446.23	367.97	368.099	398.205	485.801	457.587	442.107	280.1	266.29	297.158	7819.58	7485.12	7552.72	393.368	378.256	371.396	2611.28	2655.19	2281.52	329.366	319.176	314.199
Rv3879c	espK	13968.2	13921.6	14432.8	7698.92	7661.1	7797.29	18152.5	16928	17297.9	8572.1	8896.54	8801.02	8052.41	8693.64	8562.78	8640.74	8076.54	8294.07	9926.9	9625.92	12063.4	9997.46	9705.94	10295.6
Rv2155c	murD	1951.35	1974.55	2164.98	2483.48	2383.42	2455.81	1889.49	1918.87	1931.73	2671.61	2623.93	2557.49	2022.06	2535.37	2406.28	3218.75	2945.29	2577.65	2034.35	1974.51	3076.47	2943.34	3141.7	2877.53
Rv3389c	htdY	914.181	899.256	902.62	1320.14	1293.47	1208.46	796.141	911.088	788.623	1397.56	1453.41	1230.28	997.596	1161.99	1128.1	1343.42	1416.69	1317.32	1301.45	1220.81	1607.11	1535.36	1621.23	1499.7
Rv0560c	Rv0560c	1052.2	1042.78	1046.52	335.093	333.952	350.077	785.398	785.796	778.002	304.361	352.888	293.154	1040.58	1042.33	976.339	399.087	410.839	382.793	603.765	529.109	568.228	342.775	377.681	363.111
Rv2805	Rv2805	49.1936	57.1846	64.0991	94.8376	91.5125	89.0027	45.3573	38.1322	43.8124	90.4261	98.1448	88.9073	48.3575	57.1687	62.3913	99.7718	110.502	85.8099	88.8876	97.83	54.527	102.246	111.809	101.97
Rv3649	Rv3649	121.618	89.7013	104.652	196.63	180.976	174.05	57.2935	77.6263	66.3824	172.765	178.248	151.383	145.072	202.085	148.39	252.925	207.545	185.028	150.941	122.632	190.844	181.863	198.916	192.333
Rv2292c	Rv2292c	66.958	68.3973	86.3375	15.174	21.1708	27.0304	145.621	168.871	155.335	27.9365	22.3712	26.4319	69.8497	66.4753	62.3913	26.6905	19.1253	20.1117	62.0536	67.5165	76.0508	31.009	29.9024	26.5287
Rv0304c	PPE5	4536.74	4565.8	4312.95	962.286	924.686	991.556	3282.44	3166.34	3159.8	888.822	972.788	1009.22	6053.64	5546.7	5933.92	1046.65	1020.72	1146.37	3862.42	3847.06	2848.32	1170.8	1038.78	1064.46
Rv2363	amiA2	127.083	133.431	136.047	258.591	290.245	260.415	87.1338	96.6924	90.2801	264.662	272.785	238.688	121.789	154.223	109.606	319.015	352.047	311.061	115.722	119.876	166.451	279.919	292.524	313.37
Rv0512	hemB	2115.32	2206.65	2378.21	3312.99	3409.18	3256.84	3702.59	3486.37	3543.5	2952.45	3023.73	2938.75	1950.42	1963.68	1989.78	3981.34	3837.1	3834.63	2185.29	2353.43	2248.52	3349.81	3282.77	3528.31
Rv3352c	Rv3352c	21.8638	19.0615	11.7733	44.2576	52.5855	39.5567	17.9042	12.2568	22.57	47.7862	46.9075	40.0483	19.7012	17.2836	18.5488	69.9038	55.2508	44.9161	26.834	27.5577	31.5682	60.3418	46.8038	47.2542
Rv1992c	ctpG	4344.07	4423.4	4577.2	737.837	763.514	760.808	6281.99	5913.22	6266.5	757.962	785.88	772.932	2005.94	2214.96	2244.4	881.423	845.762	852.736	2413.38	2651.05	3149.65	885.851	871.721	880.42
Rv1824	Rv1824	138.015	148.007	120.349	230.772	218.537	243.933	122.942	113.035	138.075	199.232	181.135	224.271	205.967	171.506	192.233	250.383	289.004	280.223	129.139	150.19	127.708	232.148	224.918	230.468
Rv2240c	Rv2240c	709.208	600.999	703.782	940.157	959.515	938.154	523.997	537.937	531.06	805.748	868.149	827.398	519.395	767.125	748.695	1078.42	1088.72	991.507	858.688	730.28	875.301	926.079	995.231	924.359
Rv1770	Rv1770	1091.82	1107.81	1106.69	1674.2	1499.71	1445.8	902.372	1029.57	987.771	1440.2	1556.61	1328	1110.43	1275	1261.32	1853.09	1857.28	1671.95	1236.04	1183.6	1687.47	1608.28	1634.23	1681.25
Rv0634c	Rv0634c	1680.78	1723.39	1763.38	2163.56	2088.4	2274.51	1687.77	1653.3	1659.56	1957.03	1823.62	1893.48	2009.52	1836.05	1778.99	2242.64	2322.66	2460.33	1544.63	1624.53	1317.26	2224.26	1983.31	2250.79
Rv1240	mdh	1106.86	1119.02	1075.29	2931.11	2947.52	2946.32	914.309	1007.78	991.754	2531.2	2472.38	2488.6	1155.21	1286.96	1222.53	3074.5	3210.92	2932.96	1163.92	1121.6	1391.87	2883.83	2861.53	2774.73
Rv3434c	Rv3434c	221.371	230.981	201.454	256.694	294.342	284.809	206.495	196.109	176.577	230.109	247.527	254.707	225.668	220.698	269.8	273.896	281.921	296.983	249.892	234.241	179.365	284.947	269.122	279.38
Rv3069	Rv3069	293.795	274.71	256.396	249.739	236.976	270.304	287.661	364.98	294.738	216.14	202.063	199.441	325.965	311.104	350.74	258.644	262.087	237.988	275.048	343.094	268.33	221.253	242.47	237.929
Rv1304	atpB	5023.21	4950.39	4857.14	3194.76	3108.01	3333.31	4533.35	4586.76	4143.59	1782.79	1625.16	1676.42	5403.5	4892.58	4853.03	3547.3	3648.68	3890.94	5012.93	4888.74	3389.28	1950.21	1928.06	1903.43
Rv3904c	esxE	20.4973	25.7891	28.7792	30.9803	47.805	30.9861	21.4851	13.6187	27.8806	39.6993	34.6394	41.6502	19.7012	22.6016	35.4113	24.1486	40.3756	31.5083	40.251	38.5808	33.0032	50.2848	43.5535	38.135
Rv1166	lpqW	1623.39	1518.2	1552.77	1494.01	1537.96	1512.39	2073.31	1961.09	2067.15	1450.49	1381.24	1484.19	1395.2	1429.22	1453.55	1624.95	1664.61	1554.63	1390.34	1463.32	1526.75	1636.77	1602.38	1667.16
Rv3704c	gshA	1477.17	1436.34	1489.98	1438.37	1356.3	1362.07	1464.56	1474.9	1510.86	1463.73	1439.7	1387.27	1769.52	1871.94	1800.92	1488.95	1403.94	1433.29	1977.33	1940.06	2229.87	1607.44	1669.34	1594.21
Rv3258c	Rv3258c	260.999	252.285	302.181	1071.67	1055.81	1008.04	200.527	194.747	233.666	1118.93	1130.83	929.922	318.801	354.978	308.584	1396.8	1323.89	1236.87	271.694	283.845	462.044	1190.91	1250.05	1170.58
Rv1511	gmdA	1362.39	1387.01	1343.46	1831	1802.93	1839.39	1336.85	1346.88	1291.8	1677.66	1623	1607.54	1679.97	1490.38	1559.78	1868.97	1838.15	2050.72	1662.03	1743.03	1443.53	1915.85	1804.55	1852.86
Rv3391	acrA1	625.852	576.331	626.601	441.943	415.904	403.479	309.146	305.058	350.499	470.51	436.6	384.464	994.014	1177.94	1101.12	389.555	413.673	394.86	1163.92	1055.46	1335.91	502.848	506.391	456.791
Rv3174	Rv3174	142.115	178.281	193.605	115.07	128.391	114.715	74.0041	106.225	91.6078	91.8965	81.5468	83.3005	308.055	327.058	330.505	109.94	119.71	117.989	152.618	135.033	119.098	93.865	99.4581	97.8245
Rv2852c	mqo	3383.43	3503.96	3427.34	3021.53	2939.33	3044.55	4587.06	4529.56	4357.34	2465.77	2505.58	2575.11	2974.88	2769.36	2832.9	3621.02	3517.64	3582.56	3486.74	3623.84	3222.83	2846.96	2760.77	2956.29
Rv2505c	fadD35	255.533	215.283	234.158	146.682	159.122	136.471	263.789	242.412	211.096	134.536	160.207	177.014	306.264	313.763	320.388	152.517	180.628	165.586	375.676	362.384	294.159	170.13	171.614	193.162
Rv2841c	nusA	4658.36	4763.14	4776.04	2420.89	2485.86	2388.57	5102.7	5015.75	4977.36	2279.03	2155.58	2232.29	4642.32	4503.03	4568.05	2733.24	2511.08	2566.92	4439.35	4434.04	4363.59	2459.77	2473.45	2623.85
Rv3696c	glpK	757.035	726.581	778.346	934.467	940.393	919.694	944.149	938.325	934.665	893.234	899.18	901.888	999.387	995.8	1050.53	1101.3	1049.77	1030.39	771.477	742.681	749.028	1016.59	1024.48	1009.75
Rv3218	Rv3218	40.9947	48.2145	26.1629	158.063	116.781	145.701	20.2914	29.961	23.8977	119.833	122.681	132.96	64.4766	61.1572	74.195	129.64	121.127	117.318	57.0222	35.8251	48.7873	144.988	133.911	146.737
Rv0326	Rv0326	153.047	123.339	119.041	49.9478	39.6099	39.5567	262.595	300.972	277.479	47.051	35.361	36.8444	30.4473	30.5786	26.98	46.3907	35.4172	47.5977	57.0222	45.4703	48.7873	49.4467	40.3033	46.4252
Rv0350	dnaK	9476.6	9507.22	9444.8	8168.68	8165.1	8153.96	10389.2	9956.6	9596.25	9257.28	10038.9	9096.57	14252.9	13674	13503.5	9045.55	9157.47	9227.25	9913.48	11815.4	9552.26	10582.4	10454.8	11098.9
Rv0430	Rv0430	147.581	100.914	119.041	1022.98	1042.15	1039.02	44.1637	61.2839	61.0719	994.687	904.231	993.198	123.58	174.165	204.036	1052.37	1057.56	911.06	97.2732	74.4059	126.273	1119.68	1116.14	1035.45
Rv2847c	cysG	841.757	849.92	923.55	829.513	850.246	820.143	873.726	893.383	918.733	821.187	776.499	724.073	1122.97	1376.04	1257.94	893.498	934.305	882.233	1326.61	1252.5	1719.03	858.194	908.774	859.695
Rv1878	glnA3	230.937	232.102	262.937	252.268	280.684	246.57	225.593	235.603	237.649	262.456	264.125	277.935	231.041	237.981	273.173	265.634	313.796	302.346	218.026	241.13	223.847	289.976	308.125	310.883
Rv2975c	Rv2975c	632.684	599.878	633.142	216.862	227.415	218.221	471.478	490.271	543.008	237.46	210.723	215.46	569.543	571.687	628.971	258.009	257.129	275.53	717.809	801.93	612.711	249.748	258.071	242.074
Rv2139	pyrD	620.386	631.273	654.072	1143.74	1230.64	1166.26	824.787	789.882	748.794	1133.63	1057.94	1049.27	644.766	654.117	664.383	1457.81	1446.44	1384.36	556.805	519.463	589.752	1227.79	1281.25	1151.51
Rv3681c	whiB4	677.779	633.516	593.898	789.049	833.856	797.068	746.009	732.683	685.067	796.191	830.623	880.262	793.421	651.458	625.599	750.513	714.719	836.647	838.562	885.981	713.155	934.459	923.725	976.587
Rv1864c	Rv1864c	297.895	259.013	261.629	230.772	242.44	238.659	267.37	239.688	250.926	188.939	178.248	209.052	236.414	284.514	290.035	245.934	236.587	240.67	223.058	227.351	177.93	227.12	200.216	225.494
Rv3438	Rv3438	569.826	511.298	527.182	532.987	572.294	530.06	380.763	375.875	408.916	541.086	536.188	584.705	664.467	691.343	662.696	553.511	549.675	563.128	696.007	701.344	599.797	657.055	598.698	623.424
Rv0632c	echA3	1993.71	1927.46	1970.07	4467.48	4500.5	4379.59	2070.92	2078.21	1950.32	3550.14	3772.08	3625.97	2326.53	2031.48	2026.87	4790.95	4902.45	4875.08	1571.47	1529.45	1305.78	4167.77	3998.47	4204.79
Rv2558	Rv2558	10925.1	10950.3	11121.8	2254.61	2188.79	2107.72	10413.1	10927.6	10477.8	2562.07	2639.09	2537.46	10577.7	11537.4	11316.4	2317.63	2380.74	2133.85	12182.6	12527.7	13531.3	2858.69	2919.39	2959.61
Rv2033c	Rv2033c	131.183	136.795	108.576	617.709	682.246	646.753	105.038	81.7119	98.246	503.593	565.054	499.002	154.027	171.506	166.939	819.781	726.052	741.451	139.201	110.231	147.797	587.494	588.298	595.237
RVnc0001	AS1890	4.09947	3.3638	6.54072	15.174	14.3415	12.5263	14.3234	6.80933	1.32765	7.35172	12.2681	13.6164	3.58203	7.97703	3.3725	13.9808	17.0002	18.1005	0	1.37789	1.43492	13.4093	11.0509	13.2643
Rv1660	pks10	1209.34	1196.39	1185.18	811.178	807.222	779.268	1192.42	1138.52	1137.8	794.721	800.313	815.384	1404.16	1329.51	1386.1	779.745	813.179	764.245	1343.38	1339.31	1366.04	904.289	897.723	916.068
Rv2389c	rpfD	200.874	210.798	202.762	146.05	167.318	148.338	231.561	217.898	231.011	147.034	145.052	152.184	317.01	287.173	274.859	167.769	157.252	213.184	228.089	261.798	179.365	162.588	180.715	155.856
Rv3027c	Rv3027c	39.6282	48.2145	49.7095	139.727	145.464	141.086	69.2296	50.389	51.7783	133.066	154.434	173.81	93.1329	50.5212	65.7638	172.853	167.169	166.257	72.1164	63.3828	58.8317	166.778	176.164	175.752
Rv2522c	Rv2522c	211.806	163.705	187.065	428.666	456.879	437.102	186.204	170.233	154.007	363.91	368.765	340.411	188.057	180.813	210.781	555.417	527.008	506.815	187.838	181.881	232.457	371.27	425.134	411.194
Rv3514	PE_PGRS57	0	1.12127	0	0	0.682929	0	0	0	0	0	0	0	0	0	0	0	0	0	0	1.37789	2.86984	0.83808	0	0
RVnc0018	mcr16	13.6649	15.6977	10.4652	1.2645	2.04879	2.63712	11.9361	12.2568	18.5871	5.88137	7.21653	4.8058	14.3281	19.9426	26.98	7.62587	7.79178	2.68156	26.834	31.6914	37.3079	5.02848	8.45068	6.63217
Rv3842c	glpQ1	5583.47	5818.25	5649.88	1940.38	2018.05	1946.85	7796.69	7177.03	7270.21	2227.57	2133.21	2328.41	4004.71	4156.03	4151.55	2174.64	2178.87	2096.31	4221.32	4271.45	4082.35	2593.86	2465	2472.97
Rv3197	Rv3197	15967.4	16577.9	16162.1	5264.75	5293.38	5615.74	16350.1	15841.2	15512.3	5593.19	5887.25	6164.24	21461.8	20618	20324.4	5908.78	5688	6284.24	19268.5	19842.9	16952.1	6659.39	6410.82	6793
Rv2405	Rv2405	1843.39	1903.91	1900.73	915.499	925.369	860.359	1471.73	1664.2	1675.49	686.65	738.973	788.151	1776.69	2002.24	1905.46	1027.59	1023.56	989.496	1541.28	1456.43	1572.67	828.861	849.619	809.954
Rv3159c	PPE53	118.885	123.339	141.28	147.314	145.464	155.59	244.691	207.003	240.304	202.172	225.156	205.047	132.535	151.564	170.311	175.395	175.669	164.246	167.712	165.346	133.448	212.034	247.67	251.193
Rv0817c	Rv0817c	43.7276	45.9719	39.2443	119.495	131.805	125.922	62.0679	43.5797	34.5189	106.6	113.3	114.538	78.8047	39.8852	37.0975	124.556	133.877	110.614	51.9909	53.7376	60.2666	144.15	126.11	106.115
Rv0493c	Rv0493c	233.67	229.86	223.693	122.657	131.805	131.856	142.04	140.272	160.646	150.71	151.547	134.562	261.488	293.821	306.898	121.378	122.543	116.648	306.914	300.379	279.809	169.292	155.363	169.12
Rv0863	Rv0863	1485.37	1480.07	1334.31	1765.88	1821.37	1857.19	1237.78	1224.32	1229.4	1642.37	1636.71	1750.11	1380.87	1233.78	1284.92	1670.07	1781.48	1771.84	1138.77	1134	850.907	1947.7	1844.2	1865.3
Rv0875c	Rv0875c	1034.43	1111.18	1055.67	712.547	700.002	745.645	1483.66	1376.85	1433.86	658.714	640.828	697.642	571.334	513.189	515.993	808.978	769.261	772.96	657.433	657.252	615.581	743.377	736.51	766.015
Rv1656	argF	5517.88	5323.77	5375.17	1330.26	1441.66	1366.03	3775.4	3704.27	3980.29	1797.49	1522.69	1613.95	5369.47	5932.25	5836.11	1464.8	1466.27	1340.78	7486.69	7805.73	9209.32	1846.29	1880.6	1821.36
Rv3730c	Rv3730c	162.612	164.826	190.989	244.049	226.049	241.955	150.395	198.832	169.939	206.583	210.723	187.426	157.609	152.893	128.155	220.515	239.42	242.681	159.327	141.922	111.924	222.929	210.617	248.706
Rv3491	Rv3491	2832.73	2851.38	2841.29	1761.45	1703.22	1843.34	2616.4	2775.48	2843.82	1848.22	1783.2	1792.56	4049.49	4015.11	3782.26	1680.87	1721.98	1800	3255.3	3162.25	2937.28	2070.9	2025.56	1999.6
Rv2534c	efp	1512.7	1415.04	1441.58	1638.16	1770.15	1702.26	1408.46	1207.97	1291.8	1372.57	1513.31	1428.92	1628.03	1473.09	1473.78	1784.45	1723.4	1812.06	1740.86	1694.8	1585.59	1647.67	1580.93	1622.39
Rv1722	Rv1722	427.711	476.538	447.385	519.71	527.904	504.348	381.957	345.914	357.138	499.917	502.992	472.57	394.024	436.078	472.15	599.902	593.592	591.284	327.039	384.43	433.346	542.238	536.943	581.144
Rv3903c	Rv3903c	162.612	98.6715	122.966	180.824	165.952	184.598	109.813	113.035	136.748	170.56	219.383	191.431	93.1329	87.7474	121.41	185.563	190.544	174.972	102.305	129.521	132.013	201.139	234.019	217.204
Rv2876	Rv2876	321.125	302.742	329.652	397.053	359.221	363.263	299.597	303.696	290.755	376.408	352.888	329.998	313.428	373.591	381.093	381.929	371.88	373.407	328.716	323.803	268.33	399.764	401.082	389.64
Rv2464c	Rv2464c	319.758	335.259	320.495	498.214	518.343	520.171	449.993	438.521	398.295	490.359	465.466	467.764	218.504	288.503	298.466	549.698	489.466	534.971	353.873	340.338	317.117	521.286	531.093	546.325
Rv0144	Rv0144	1949.98	1922.97	2111.35	3301.61	3251.42	3399.24	1401.3	1282.88	1222.76	3181.82	3131.97	3378.48	4452.47	4086.9	4036.88	3313.44	3305.13	3481.34	2480.47	2506.38	2185.38	3710.18	3595.44	3567.28
Rv3725	Rv3725	944.244	886.922	919.626	1877.15	1774.93	1788.62	719.749	841.633	839.074	1599	1628.77	1527.44	981.477	1035.68	1112.93	1898.21	1932.36	1879.1	813.406	855.668	929.828	1810.25	1807.15	1716.9
Rv0842	Rv0842	121.618	137.916	115.117	148.579	157.074	166.798	133.685	142.996	163.301	135.272	132.063	148.98	143.281	114.337	112.979	157.601	189.836	208.491	109.013	129.521	107.619	166.778	148.862	151.711
Rv0630c	recB	330.69	319.561	364.972	479.246	516.977	548.52	253.046	243.774	227.028	441.103	479.899	466.162	21.4922	17.2836	18.5488	90.2394	84.2929	83.1284	316.977	358.251	518.006	533.857	499.89	523.112
Rv3690	Rv3690	587.59	547.178	603.055	445.737	486.928	518.853	422.539	427.626	438.124	482.273	455.363	454.148	648.348	688.684	661.01	496.952	489.466	499.441	565.191	529.109	477.828	524.638	489.49	550.47
Rv2725c	hflX	2754.84	2728.04	2870.07	2750.92	2832.79	2714.91	2593.72	2677.43	2590.24	2679.7	2934.96	2755.32	3385.02	3535.15	3655.79	2881.31	2951.67	2777.43	3201.63	3191.19	3359.15	3149.51	3031.85	3209.97
Rv1059	Rv1059	774.799	788.251	686.776	627.193	724.587	624.997	882.081	920.621	913.422	641.805	670.416	669.608	592.827	452.032	559.835	587.192	599.259	614.748	608.796	636.584	549.574	770.196	704.007	750.264
Rv3429	PPE59	863.621	941.864	837.213	554.484	538.148	561.706	1534.99	1596.11	1528.12	890.293	1011.04	985.989	684.168	635.504	529.483	475.346	501.507	565.139	888.876	968.654	733.244	1106.27	1012.13	1120.84
Rv0710	rpsQ	1873.46	1995.85	1973.99	8891.97	9129.39	8861.37	1342.82	1567.51	1428.55	7556.09	7868.18	7589.96	3748.6	3694.7	3640.61	8297.58	8912.38	8861.21	5162.19	4811.58	4294.72	8729.44	8344.08	8727.11
Rv0221	Rv0221	871.82	920.56	831.98	2913.41	2952.3	2989.17	977.57	848.442	914.75	2710.58	2488.98	2501.42	1362.96	1256.38	1209.04	3256.88	3230.76	3297.65	1031.43	1032.04	846.603	2925.74	2684.07	3027.59
Rv1459c	Rv1459c	1509.97	1638.17	1484.74	1256.28	1221.76	1262.52	1384.59	1400	1378.1	1354.92	1298.25	1307.98	1839.37	2006.22	1991.46	1270.34	1204.18	1181.23	1905.21	1926.29	2189.69	1462.45	1495.12	1481.46
Rv3003c	ilvB1	2466.51	2483.61	2507.71	2977.9	3088.2	3078.83	2388.42	2391.44	2376.49	2911.28	2896.72	2949.16	2392.8	2508.78	2463.61	3460.87	3411.38	3362.68	2782.35	2634.52	2934.41	3199.79	3299.67	3310.28
Rv1880c	cyp140	5590.31	5682.58	5645.95	3331.33	3301.28	3448.69	4772.07	4725.67	4660.05	3135.51	3205.58	3275.95	6646.46	6436.14	6640.45	3527.6	3460.97	3686.47	5348.35	5371	4629.05	3678.33	3482.33	3618.68
Rv0798c	cfp29	798.03	780.402	724.712	1569.25	1537.96	1636.99	699.458	710.894	707.637	1248.32	1293.2	1162.2	985.059	893.428	915.634	1669.43	1751.03	1753.74	774.832	748.193	645.714	1407.14	1376.81	1368.71
Rv2305	Rv2305	297.895	319.561	298.257	359.118	383.806	373.152	257.821	277.82	224.373	354.353	324.022	328.396	304.473	276.537	315.329	439.123	386.756	357.988	310.268	242.508	321.422	359.536	375.73	392.956
Rv0509	hemA	8304.15	8328.77	8267.47	5737.68	5633.48	5510.25	8609.54	8775.86	8933.75	5012.4	5027.04	4900.31	6986.76	7592.81	7824.2	6276.09	6036.51	5663.45	8660.67	8868.08	10045.9	5527.14	5794.57	5407.7
Rv3261	fbiA	455.041	546.057	467.008	668.289	625.563	603.9	506.092	469.843	508.49	580.05	599.694	596.72	548.051	655.446	600.305	762.587	697.01	685.139	560.16	596.625	632.8	659.569	640.952	690.575
Rv3042c	serB2	3591.13	3603.75	3590.86	2105.39	2229.76	2281.76	4330.43	4258.55	4264.41	1831.31	1720.42	1838.22	2018.48	2156.46	2075.77	2412.32	2313.45	2310.16	2421.77	2456.77	2447.97	2041.56	1977.46	2015.35
Rv0322	udgA	45.0941	47.0932	22.2385	107.483	91.5125	88.3434	40.5829	32.6848	25.2253	88.2206	81.5468	73.6889	42.9844	43.8737	60.705	89.604	98.4598	99.2177	45.2824	79.9174	48.7873	101.408	94.2576	77.099
Rv3158	nuoN	1473.08	1502.5	1589.4	7050.86	7019.14	6971.88	1706.87	1741.83	1747.19	6055.61	5799.93	5608.37	1626.24	1689.8	1681.19	7713.57	7688.36	7553.95	1199.14	1259.39	1209.64	6440.65	6500.53	6608.13
Rv0785	Rv0785	250.067	308.348	285.176	632.251	628.294	596.648	293.629	262.84	327.929	524.913	565.054	584.705	394.024	364.284	325.446	661.544	730.302	655.641	330.394	310.025	268.33	605.932	602.599	666.533
Rv0419	lpqM	2943.42	3028.54	3084.61	2565.67	2465.37	2449.22	3652.46	3751.94	3616.52	2475.32	2551.77	2348.43	2620.26	2682.94	2623.81	2697.02	2711.54	2739.21	2896.39	2799.87	3181.22	2740.52	2745.17	2769.76
RVnc0046	ssr	2.55495e+06	2.42152e+06	2.29513e+06	889212	865496	861652	1.40728e+06	1.75428e+06	1.72061e+06	899170	870186	802679	2.87043e+06	2.36973e+06	2.45074e+06	923690	984702	1.05013e+06	2.16243e+06	2.15201e+06	1.66387e+06	969437	913745	993925
Rv0101	nrp	4834.64	5123.07	5239.12	1870.83	1869.86	1891.47	1683	1615.17	1610.44	1532.1	1505.37	1542.66	16423.6	16088.3	16351.6	2451.72	2427.49	2328.93	5355.06	5565.28	5223.11	1723.93	1672.59	1726.85
Rv2421c	nadD	181.743	170.433	158.286	212.436	211.025	215.584	153.976	136.187	177.905	200.702	194.125	207.45	290.145	208.732	264.741	231.318	283.337	247.374	244.86	220.462	232.457	238.015	211.917	224.665
Rv1950c	Rv1950c	236.403	269.104	249.856	171.972	123.61	154.931	121.749	193.385	144.714	106.6	137.114	114.538	247.16	231.334	231.016	147.433	177.086	181.005	209.641	216.328	180.8	132.417	141.061	126.84
Rv0491	regX3	2377.69	2296.35	2181.99	1279.04	1311.91	1383.17	2984.04	3256.22	2976.59	1271.11	1203.72	1198.25	1722.96	1567.49	1649.15	1331.99	1492.48	1434.63	1866.64	2002.07	1485.14	1374.45	1370.31	1361.25
Rv2670c	Rv2670c	97.0207	82.9737	95.4946	127.715	139.317	158.886	83.553	76.2644	92.9354	111.011	109.691	103.325	87.7598	58.4982	80.94	146.798	162.919	157.542	73.7935	71.6501	55.9619	113.141	128.06	120.208
Rv2781c	Rv2781c	694.176	787.129	706.398	1583.16	1585.76	1582.27	547.869	558.365	670.463	1466.67	1340.11	1386.47	788.047	779.09	770.616	1831.48	1661.77	1671.95	764.769	801.93	1014.49	1537.04	1590.68	1556.9
Rv3363c	Rv3363c	146.214	125.582	121.657	251.004	262.245	300.631	72.8105	87.1594	100.901	238.196	237.424	248.3	227.459	224.686	210.781	299.315	305.296	302.346	199.578	155.701	143.492	255.614	288.623	261.971
Rv2577	Rv2577	94.2877	79.6099	85.0294	104.954	88.7807	107.462	74.0041	72.1788	73.0207	80.1337	86.5984	88.9073	121.789	98.3834	87.685	128.369	125.377	113.296	53.668	63.3828	38.7428	101.408	91.0074	93.6794
Rv3079c	Rv3079c	401.748	353.199	395.06	125.818	134.537	111.418	507.286	562.45	554.957	102.189	98.8665	93.7131	161.192	164.859	128.155	128.369	132.46	129.385	155.973	197.038	157.841	130.741	98.808	101.97
Rv0919	Rv0919	113.419	136.795	124.274	70.1798	66.2441	65.2686	165.912	168.871	171.267	61.0192	62.0622	75.2908	114.625	107.69	87.685	55.923	67.2927	68.3798	132.493	122.632	111.924	66.2083	87.7571	64.6636
Rv1960c	parD1	113.419	125.582	115.117	128.979	103.122	108.781	95.4891	102.14	94.2631	142.623	114.021	128.956	162.983	146.246	151.763	110.575	115.46	93.1842	204.609	147.434	165.016	139.121	138.461	153.369
Rv2926c	Rv2926c	3136.09	3241.58	3358.01	2741.44	2823.23	2898.85	3404.19	3508.16	3446.58	2732.63	2540.22	2749.72	2681.15	2478.2	2478.79	2717.99	2926.88	2934.3	2514.01	2572.51	2277.22	3043.91	2988.94	2918.98
Rv0773c	ggtA	220.005	214.162	251.164	892.106	956.1	950.021	224.399	226.07	191.181	916.024	878.974	853.83	286.563	308.445	325.446	1016.78	1008.68	962.01	238.152	279.711	246.806	956.25	995.231	1003.94
Rv2547	vapB19	220.005	237.709	226.309	132.14	156.391	142.404	223.206	243.774	274.823	162.473	133.506	164.999	225.668	226.016	205.723	153.788	121.835	133.408	221.38	217.706	182.235	168.454	164.463	181.556
Rv2927c	Rv2927c	1791.47	1794.03	2010.62	9156.26	8906.07	9212.77	2312.03	2402.33	2367.2	9554.29	10169.5	10061.7	2219.07	2104.61	2082.52	9993.7	10181.7	10108.8	1524.51	1752.67	1670.25	11266.3	10796.1	11166.9
Rv1418	lprH	403.114	353.199	368.897	766.288	719.124	801.683	383.15	456.225	440.779	636.659	633.611	658.394	462.082	491.917	448.543	851.555	842.221	876.2	379.03	403.721	364.47	686.388	747.561	713.787
Rv3688c	Rv3688c	2088	2107.98	1992.3	2248.28	2225.66	2246.82	1148.26	1045.91	1117.88	1752.65	2048.77	2008.02	3866.81	3564.4	3669.28	2341.78	2496.2	2530.72	2088.02	1931.8	1918.49	2164.76	2054.82	2264.06
Rv2877c	merT	386.716	428.324	425.147	410.963	419.318	423.916	565.773	627.82	600.097	419.783	379.59	396.478	308.055	291.162	300.153	469.626	493.716	421.675	328.716	289.356	289.854	430.773	449.836	452.646
Rv3793	embC	1545.5	1589.96	1631.26	2683.27	2747.42	2653.6	1338.04	1178.01	1286.49	2826.73	2636.2	2711.27	2720.55	2772.02	2859.88	2935.96	2696.66	2602.45	2259.09	2339.65	2498.2	2919.87	3116.35	3076.5
Rv0940c	Rv0940c	315.659	290.408	264.245	601.27	538.831	553.794	327.05	385.408	317.308	484.478	458.971	510.216	261.488	311.104	271.486	575.753	585.092	617.429	204.609	194.282	218.108	595.037	510.941	516.48
Rv0951	sucC	4102.2	3956.95	3835.48	3790.34	3904.99	3915.46	4089.32	4089.68	3605.89	2881.14	3475.48	3202.26	3659.05	3533.83	3728.3	4070.31	4239.44	4210.05	4588.61	4283.85	3776.71	3514.91	3567.49	3574.74
Rv2326c	Rv2326c	6095.91	5986.44	6022.7	4899.94	4719.04	4926.79	6465.81	6765.75	6703.3	4066.23	4086	4005.63	4305.6	4586.79	4681.03	5746.73	5471.25	5301.44	4771.42	4661.39	5112.62	4457.75	4450.26	4642.52
Rv3111	moaC1	4.09947	14.5765	11.7733	17.703	19.8049	14.5041	20.2914	13.6187	17.2594	36.7586	35.361	40.0483	8.95508	11.9655	6.745	13.3453	9.20847	20.1117	25.1569	20.6683	14.3492	49.4467	41.6034	33.9899
Rv1074c	fadA3	5955.16	5599.61	5504.67	5248.95	5288.6	5360.6	7765.65	7879.75	7628.67	4547.77	5133.12	4876.28	4296.65	4245.11	4060.49	5652.67	5680.21	6006.69	5361.77	5113.34	4518.56	5445.85	5340.18	5429.26
Rv1314c	Rv1314c	136.649	200.707	179.216	436.253	379.708	418.642	175.461	182.49	207.113	404.344	383.919	454.148	284.772	218.039	249.565	358.416	354.88	372.066	214.672	223.218	192.279	479.382	480.389	421.143
Rv0966c	Rv0966c	716.04	703.034	769.189	637.941	612.587	601.922	580.097	610.116	608.063	554.319	636.498	596.72	721.78	700.649	711.598	581.472	625.468	652.96	687.621	713.745	662.933	686.388	642.902	663.217
Rv2435c	Rv2435c	464.606	428.324	397.676	568.393	522.441	542.587	405.829	412.645	404.933	560.201	620.622	615.142	623.274	457.35	465.405	573.847	610.592	630.167	420.958	468.482	318.552	648.674	644.852	706.326
Rv3041c	Rv3041c	496.035	512.419	524.566	532.987	524.489	518.853	724.524	614.201	610.719	476.391	503.714	423.711	419.098	440.066	451.915	537.624	546.133	555.083	504.815	447.813	466.349	519.61	503.791	543.009
Rv3832c	Rv3832c	411.313	349.835	422.531	75.2378	81.9515	71.2021	383.15	394.941	349.172	72.0468	78.6602	79.2957	569.543	559.722	524.424	71.1748	81.4595	73.7429	420.958	432.656	421.866	83.808	85.8069	86.2182
Rv2762c	Rv2762c	180.377	136.795	130.814	283.248	297.757	274.919	121.749	142.996	151.352	269.073	259.795	234.683	182.684	132.951	160.194	369.855	336.463	325.81	155.973	137.789	183.67	271.538	302.925	274.406
Rv1096	Rv1096	282.863	270.225	315.263	797.9	723.222	768.06	260.208	309.143	264.202	713.116	750.519	698.443	397.606	344.342	343.995	835.033	843.637	845.362	271.694	376.163	317.117	808.747	810.616	786.741
Rv0428c	Rv0428c	84.7223	66.1547	66.7154	305.377	283.415	264.371	75.1977	74.9026	75.676	278.63	246.805	294.756	89.5508	115.667	94.43	292.325	292.546	260.111	83.8562	75.7838	99.0095	310.928	310.725	289.328
Rv0589	mce2A	128.45	122.218	130.814	76.5023	84.0002	77.7949	115.781	147.081	175.25	58.8137	59.8972	74.4899	154.027	154.223	190.546	78.8006	77.9178	96.5362	124.107	137.789	86.0952	77.9415	68.9056	67.9797
Rv1366	Rv1366	122.984	90.8226	78.4887	175.133	185.757	189.213	115.781	100.778	102.229	152.916	195.568	153.786	103.879	78.4408	112.979	216.066	235.878	208.491	48.6366	90.9405	88.965	185.216	162.513	213.058
Rv1085c	Rv1085c	358.02	352.078	353.199	560.174	508.099	535.994	244.691	272.373	294.738	513.885	510.209	501.405	424.471	441.396	463.719	580.837	571.633	484.022	451.147	447.813	543.835	552.295	607.149	533.061
Rv0222	echA1	504.234	487.751	499.711	1235.42	1341.27	1303.39	483.414	471.205	424.848	1208.62	1194.34	1237.49	608.946	724.58	617.168	1440.02	1484.69	1474.19	538.357	523.597	457.739	1366.07	1305.96	1373.69
Rv2584c	apt	2027.87	2176.38	2051.17	1259.44	1244.3	1212.41	865.37	848.442	869.61	1193.92	1086.09	1023.63	3583.83	3886.14	3962.69	1403.8	1495.31	1382.34	1989.07	1951.09	2350.4	1250.42	1222.1	1198.76
Rv0529	ccsA	614.92	667.154	630.526	1072.93	1105.66	1117.48	810.464	740.855	809.866	1048.35	982.892	909.898	472.828	521.166	512.62	1457.18	1343.73	1343.46	563.514	582.846	855.212	1098.72	1063.49	1105.91
Rv0686	Rv0686	1417.05	1526.04	1459.89	1499.7	1509.27	1471.51	1297.46	1271.98	1234.71	1407.12	1441.14	1421.72	1911.02	1810.79	1920.64	1436.21	1476.9	1629.05	1861.61	2011.71	1509.54	1606.6	1543.22	1593.38
Rv1323	fadA4	13925.9	14119	13930.4	7206.39	6874.36	7077.36	18423.4	18231.3	17147.9	6709.18	7400.55	6752.15	10740.7	10981.7	10498.6	7562.95	7392.28	7803.34	11976.3	12533.3	11512.4	7674.3	7744.73	7746.37
Rv3330	dacB1	122.984	179.403	167.443	1146.27	1278.44	1215.05	161.138	178.404	184.543	1136.58	1171.96	1226.28	168.356	170.177	139.959	1323.72	1259.44	1151.06	169.39	144.678	210.933	1322.49	1353.41	1246.02
Rv2132	Rv2132	217.272	252.285	277.327	197.894	177.561	187.235	236.336	212.451	245.615	208.054	211.444	238.688	351.039	303.127	306.898	205.898	179.919	225.251	348.842	289.356	249.676	238.015	237.919	254.509
Rv0532	PE_PGRS6	206.34	171.554	171.367	189.675	202.83	185.917	186.204	151.167	167.284	191.88	200.62	167.402	177.311	172.836	259.683	226.234	220.295	205.139	238.152	206.683	350.12	191.92	215.167	214.716
Rv0803	purL	1724.51	1803	1844.48	2329.84	2366.35	2272.53	1895.46	1856.22	1925.09	2237.86	2227.74	2238.7	2072.21	2313.34	2350.63	2721.16	2703.75	2534.07	2470.4	2532.56	2937.28	2406.97	2515.05	2516.08
Rv1901	cinA	666.847	587.544	512.793	2240.06	2309.67	2337.14	472.671	482.1	509.817	1690.89	1841.66	1687.64	823.868	804.351	854.929	2336.69	2357.37	2455.64	805.02	717.879	602.666	1982.06	1862.4	1950.69
Rv1650	pheT	1340.53	1430.74	1397.1	1973.25	1951.81	1939.6	1295.07	1206.61	1286.49	1952.62	1908.05	1895.09	1808.93	2007.55	2070.72	2329.07	2261.74	2129.16	1425.56	1497.76	1772.13	2065.87	2148.42	2171.21
Rv1484	inhA	1212.08	1264.79	1215.27	2427.84	2503.62	2470.98	1136.32	1257	1074.07	2032.75	2125.27	2097.73	1255.5	1349.45	1416.45	2777.09	2868.08	2691.62	1447.36	1304.86	1459.31	2279.58	2332.39	2325.4
Rv0831c	Rv0831c	2180.92	2220.11	2117.89	5601.74	5594.55	5791.11	1912.17	1835.79	1779.05	5093.27	5090.54	5165.43	3227.41	2943.52	2893.61	5587.22	5569	6128.03	2633.09	2510.51	2099.29	5626.87	5515.7	5881.9
Rv1415	ribA2	4754.01	4906.66	4908.16	5429.77	5326.84	5379.06	5641.02	5552.32	5545.59	4831.55	4716.73	4684.05	5713.34	5436.35	5342.04	5932.29	6027.3	6252.06	5415.44	5690.67	5233.15	5199.45	5049.61	5538.69
Rv2461c	clpP1	7327.11	7310.66	7175.17	3085.38	3224.11	3056.42	4821.01	4859.13	4814.06	2723.08	2778.36	2828.21	7962.86	8112.64	8201.92	3176.81	3196.76	3064.35	4670.79	4482.27	4030.69	3097.54	3029.25	3109.66
Rv1155a	Rv1155a	561.627	506.813	477.473	605.696	581.172	557.091	293.629	344.552	308.015	499.917	518.869	500.604	546.26	535.791	524.424	481.701	571.633	510.167	382.384	363.762	512.266	558.161	569.446	554.615
Rv1837c	glcB	8714.1	8747	8763.26	11061.9	10857.9	11301.4	11421.7	11345.7	10942.5	11442.2	11541.4	11187.1	7640.48	7439.91	7461.66	11847.4	11837.1	12018.8	10570.9	10528.4	9898.08	12531	12434.2	12873.9
Rv2488c	Rv2488c	643.616	632.395	652.764	619.606	635.807	624.997	467.897	487.548	521.766	576.375	552.786	517.424	730.735	756.489	741.95	706.664	703.385	646.256	628.922	588.358	717.46	630.236	610.399	583.631
Rv2423	Rv2423	235.036	261.255	234.158	146.05	144.781	150.975	136.072	123.93	142.058	128.655	123.403	124.951	340.293	271.219	305.211	160.779	170.711	154.19	202.932	179.125	146.362	133.255	133.911	150.882
Rv0333	Rv0333	568.459	555.027	512.793	302.848	297.074	308.543	423.733	622.372	520.438	246.282	315.362	273.93	415.516	320.411	359.171	286.606	342.13	339.888	362.259	400.965	322.857	297.518	319.176	307.567
Rv0024	Rv0024	946.977	914.954	923.55	1102.01	1079.03	1101	1098.13	1047.27	1075.4	1057.18	967.737	921.912	784.465	820.305	750.381	1240.47	1111.39	1079.33	731.226	764.727	987.225	1003.18	1142.79	1110.06
Rv0407	fgd1	936.045	855.527	777.038	1282.2	1350.15	1300.76	609.937	599.221	541.681	996.893	1088.97	1162.2	1001.18	978.516	999.946	1344.06	1292.02	1435.3	759.738	770.239	738.984	1194.26	1177.25	1217
Rv3692	moxR2	1764.14	1687.51	1807.86	1292.95	1385.66	1297.46	1373.85	1247.47	1348.89	1287.29	1361.04	1401.69	1980.86	2278.77	2128.05	1382.82	1393.31	1304.58	1537.92	1478.47	1604.24	1516.93	1487.97	1469.03
Rv2849c	cobO	349.821	431.688	357.123	531.723	555.904	509.623	660.069	597.859	641.254	460.953	495.776	469.366	388.651	368.273	369.289	629.134	677.177	664.356	375.676	347.227	347.251	502.848	517.442	556.273
Rv3685c	cyp137	890.951	1011.38	945.789	616.444	598.929	594.01	740.041	806.224	779.33	592.548	580.209	575.094	1158.79	1181.93	1306.84	611.34	617.676	593.295	1023.05	1055.46	1147.94	637.779	628.601	665.704
Rv2181	Rv2181	3466.78	3551.05	3448.27	2096.54	2052.2	2094.53	4150.2	4171.39	4136.95	1863.66	1645.37	1810.98	2317.58	2331.95	2345.57	2236.92	2169.66	2273.96	2733.71	2710.3	2423.58	1964.46	1941.71	1964.78
Rv3683	Rv3683	4165.06	4072.44	4204.38	3191.6	3396.2	3319.47	3301.54	3042.41	3273.98	3152.42	3111.77	3257.53	4987.98	5097.32	5188.59	3436.72	3226.51	3358.65	4184.43	4139.17	4017.78	3493.12	3446.58	3568.11
Rv2965c	kdtB	140.748	124.461	138.663	522.239	526.538	512.919	105.038	104.864	110.195	420.518	473.404	483.784	281.19	240.64	173.684	507.12	579.425	593.295	184.484	180.503	120.533	529.667	473.888	518.138
Rv1106c	Rv1106c	1097.29	1170.6	1169.48	784.623	731.417	838.603	972.796	1055.45	1022.29	928.522	902.066	857.835	1405.95	1427.89	1488.96	798.81	803.97	772.289	1303.13	1332.42	1440.66	942.84	1034.23	984.877
Rv0189c	ilvD	2936.58	2864.84	2995.65	3821.96	3963.04	3973.47	3430.45	3207.19	3100.06	3561.17	3374.45	3699.66	3257.86	3383.59	3154.97	4245.7	4179.23	4192.62	2914.84	2911.47	2458.02	3971.66	3802.81	3952.77
Rv2962c	Rv2962c	304.727	265.74	240.699	287.674	260.879	270.964	964.44	1005.06	953.252	277.16	245.362	246.698	266.862	257.924	232.703	312.661	290.421	286.927	233.12	236.997	223.847	279.081	290.574	277.722
Rv3121	cyp141	694.176	719.853	736.485	788.417	807.222	843.218	815.239	892.022	817.832	874.119	920.108	931.524	768.346	764.466	701.48	866.172	791.928	849.384	687.621	644.851	523.746	998.154	971.179	1037.11
Rvnt09	thrV	28.6963	14.5765	20.9303	18.3353	20.4879	15.8227	33.4212	25.8754	34.5189	20.5848	19.4846	16.0193	10.7461	13.2951	6.745	25.4196	12.0418	16.7597	16.7712	23.4241	11.4794	18.4378	23.4019	19.8965
Rv2549c	vapC20	84.7223	69.5185	87.6457	378.718	397.465	384.36	130.104	114.397	83.6419	408.755	437.322	456.551	168.356	155.552	141.645	362.864	409.423	373.407	186.161	181.881	172.19	473.515	494.04	465.91
Rv0768	aldA	552.062	593.15	555.961	193.469	191.903	181.961	576.516	618.287	539.025	193.35	208.558	238.688	447.754	478.622	450.229	191.918	170.002	187.039	625.568	555.288	711.72	238.015	239.219	227.152
Rv0511	hemD	5843.11	6029.05	6250.32	6340.84	6402.46	6369.95	7149.75	6882.87	7210.46	6698.15	5930.55	5973.61	5034.55	5381.84	5311.69	7953.15	7540.32	6956.64	5849.81	5580.44	7706.95	6697.94	6956.21	6849.37
Rv2516c	Rv2516c	978.406	947.47	978.492	441.311	415.221	423.257	1653.16	1729.57	1529.45	479.332	440.93	436.527	958.194	834.929	833.008	460.73	456.173	542.346	977.764	986.567	809.295	475.191	485.589	535.548
Rv2179c	Rv2179c	69.6909	80.7312	107.268	86.6184	95.61	90.3212	51.3254	65.3695	57.0889	74.9875	71.4437	72.087	139.699	103.701	150.076	100.407	87.8346	94.525	95.5961	85.429	107.619	88.8365	79.3064	72.9539
Rv0928	pstS3	893.684	941.864	882.998	1091.9	1023.71	1118.8	1117.22	1168.48	1011.67	902.056	876.809	913.902	986.85	941.29	924.065	1313.56	1330.27	1401.12	781.54	850.156	637.104	1005.7	959.478	1002.29
Rv3273	Rv3273	4609.17	4717.17	4586.36	6330.73	6384.02	6488.62	4764.91	4748.82	4621.55	5682.88	5639.72	5664.43	5793.94	5876.41	5911.99	6629.42	6397.05	6373.4	4905.59	4708.24	4587.44	6276.38	6263.26	6166.26
Rv0392c	ndhA	1242.14	1204.24	1203.49	809.913	807.905	799.705	1099.32	1052.72	997.064	732.231	804.643	768.928	1479.38	1325.52	1404.65	778.474	801.137	826.591	1541.28	1554.26	1429.18	855.68	839.868	844.772
Rv0090	Rv0090	51.9266	40.3656	51.0176	29.7158	38.9269	29.6676	44.1637	39.4941	37.1742	33.8179	42.5775	36.0435	50.1485	49.1917	65.7638	38.1293	36.1255	32.1787	46.9595	27.5577	37.3079	39.3898	35.7529	49.7413
Rv3098A	Rv3098A	795.297	723.217	761.34	554.484	567.514	568.299	854.628	806.224	772.692	621.955	662.478	601.526	1006.55	917.359	944.3	529.362	554.633	585.25	857.011	913.539	813.6	675.493	712.458	687.258
Rv2575	Rv2575	860.888	831.98	779.654	876.932	868.685	892.664	658.875	713.617	693.033	718.998	763.509	756.913	990.432	913.37	902.144	950.056	891.805	937.876	749.675	766.105	617.016	833.052	825.567	805.809
Rv3190A	Rv3190A	6165.6	6206.21	5725.75	1036.26	992.978	1037.71	3682.3	3907.19	3499.68	1160.1	1369.7	1207.86	4542.02	4117.48	4298.25	1211.24	1299.1	1316.65	7907.64	8048.24	5544.53	1387.02	1278.65	1450.79
Rv3613c	Rv3613c	1097.29	1149.3	969.335	574.716	581.855	597.307	629.035	652.333	653.203	517.561	469.075	467.764	1318.19	1360.08	1394.53	658.367	622.634	677.764	850.302	879.092	658.628	540.562	555.795	503.216
Rv3915	cwlM	3252.24	3272.98	3225.88	2928.59	2999.42	2978.62	3519.97	3529.95	3624.48	2683.38	2621.04	2625.57	3524.72	3213.41	3144.86	3111.99	3246.34	3294.97	3647.75	3738.21	3327.58	2810.92	2940.19	2971.21
Rv1392	metK	3666.29	3599.27	3661.5	4572.44	4517.57	4486.39	6689.01	6568.28	6550.62	4883.01	4899.3	4800.99	2953.39	2952.83	2816.04	5043.88	5004.45	4877.76	3585.69	3590.77	3841.28	5339.41	5363.58	5340.55
Rv1742	Rv1742	337.523	345.35	259.013	197.262	161.171	187.895	404.635	415.369	403.605	192.615	155.877	166.601	300.891	259.254	269.8	193.824	187.711	201.117	313.622	307.269	274.07	208.682	165.113	195.649
Rv2237	Rv2237	621.752	636.88	622.677	555.116	607.124	593.351	432.088	430.349	447.418	512.415	550.621	560.676	879.389	826.952	784.106	607.528	631.843	689.831	858.688	943.852	774.857	593.361	588.948	603.527
Rv3295	Rv3295	3028.14	3114.88	2887.08	4942.3	4978.55	5074.47	2956.58	2949.8	2988.54	5011.66	4827.86	5090.14	3827.4	3520.53	3273.01	4754.73	4869.86	5251.16	3691.35	3643.13	3499.77	5486.07	5407.14	5525.43
Rv0403c	mmpS1	28.6963	45.9719	37.9362	77.1346	70.3417	60.6537	22.6787	31.3229	30.5359	83.0744	80.8252	70.485	107.461	62.4868	79.2538	95.9588	100.585	75.0837	78.8249	56.4934	41.6127	82.1319	86.457	89.5343
Rv3063	cstA	550.695	590.908	536.339	558.277	580.489	601.922	515.641	465.758	515.128	508.004	502.271	557.473	745.063	624.868	682.931	633.583	629.718	581.899	548.42	523.597	493.612	590.847	553.195	579.486
Rv2150c	ftsZ	1684.88	1816.45	1820.94	9110.73	8924.51	8987.29	1347.59	1179.38	1317.03	8612.54	8825.1	8601.58	2802.94	3056.53	2669.33	8994.71	8580.88	8606.47	1697.25	1603.86	1832.39	9622.84	9405.61	9586.8
Rv2571c	Rv2571c	220.005	217.526	244.623	354.06	387.904	357.329	155.17	196.109	161.973	327.151	332.682	337.207	324.174	358.966	381.093	403.536	415.089	416.312	236.475	270.066	279.809	349.479	391.982	350.676
Rv2404c	lepA	504.234	518.025	467.008	759.965	773.075	758.171	408.216	418.093	404.933	599.9	632.89	608.734	549.842	526.484	549.718	906.843	984.598	969.384	451.147	501.551	377.384	693.93	664.354	666.533
Rv2438c	nadE	2757.57	2850.26	2796.81	3524.17	3446.06	3717.02	3374.35	3523.14	3317.79	3217.11	2992.7	2929.13	2525.33	2514.09	2392.79	4023.28	4146.64	4404.46	2193.68	2429.21	2026.11	3306.23	3210.61	3526.66
Rv0278c	Rv0278c	255.533	220.89	240.699	80.2958	75.1222	71.2021	202.914	182.49	205.786	91.1613	85.1551	98.5188	159.401	191.449	205.723	73.7167	78.6262	73.0725	244.86	238.374	477.828	100.57	95.5577	106.115
Rv2316	uspA	20.4973	41.4869	31.3955	58.1671	58.7319	50.1052	29.8404	28.5992	26.553	49.2565	41.1342	58.4705	21.4922	43.8737	20.235	52.1101	36.8339	46.9273	40.251	41.3366	28.6984	55.3133	53.9544	53.8864
Rv1707	Rv1707	1571.46	1674.05	1571.08	1265.13	1298.25	1352.84	1447.85	1379.57	1402	1190.98	1176.29	1224.68	2398.17	1965.01	2003.27	1386	1359.31	1383.68	1819.68	1891.84	1651.59	1259.63	1337.81	1342.19
Rv1746	pknF	446.842	390.201	474.857	798.533	760.783	789.157	416.571	428.987	495.213	730.761	781.55	773.733	453.127	485.269	505.875	814.061	791.22	762.233	523.263	530.486	444.825	833.89	859.37	813.27
Rv2283	Rv2283	0	2.24253	0	3.16125	4.09757	3.2964	0	6.80933	0	1.47034	0.721653	3.20387	0	0	0	3.17745	2.83337	1.34078	0	0	2.86984	0.83808	2.60021	2.48706
Rv1596	nadC	20828	21120.2	20671.3	6555.18	6870.26	6709.48	33269.6	31766.9	30970.1	7451.7	7277.87	7238.33	13099.5	13154.1	13287.7	6797.83	6765.39	6894.96	24200.9	25248.4	23232.8	8136.08	7977.45	7980.99
Rv2263	Rv2263	556.161	456.356	460.467	496.949	458.928	463.473	396.28	397.665	432.814	421.253	398.353	383.663	474.62	546.427	490.699	488.056	505.757	489.385	479.658	507.062	578.273	422.392	447.236	449.329
Rv1113	vapB32	66.958	63.9122	56.2502	72.0766	67.61	48.1274	56.0999	49.0271	34.5189	58.8137	60.6189	44.8541	94.9239	91.7359	101.175	54.6521	71.5427	50.9496	82.1791	104.719	101.879	60.3418	59.8048	60.5185
Rv2922A	acyP	87.4553	71.7611	73.2561	98.6311	93.5612	91.6398	87.1338	69.4551	69.0377	88.9558	75.7736	72.8879	75.2227	114.337	69.1363	90.8749	99.1681	85.1395	80.502	41.3366	123.403	70.3987	93.6076	96.1664
Rv1677	dsbF	964.741	871.224	880.381	1543.32	1443.71	1538.76	1064.7	1074.51	1047.52	1412.26	1331.45	1409.7	931.329	886.78	859.988	1637.02	1739.69	1663.91	987.827	957.631	1021.66	1521.12	1549.08	1474
Rv3731	ligC	308.826	290.408	281.251	330.667	336.684	370.515	278.112	325.486	297.393	333.768	358.662	375.653	304.473	280.526	345.681	307.577	323.713	325.81	264.986	271.444	242.501	426.583	376.38	367.256
Rv1491c	Rv1491c	1844.76	1938.67	1970.07	2051.65	1984.59	1993.66	2214.15	1970.62	2101.67	1883.51	1979.49	1978.39	2484.14	2530.05	2456.87	2388.8	2144.16	2168.04	2488.85	2637.28	2663.21	2194.93	2106.82	2091.62
Rv0041	leuS	2342.16	2321.02	2349.43	1754.5	1748.3	1859.17	2223.7	2199.41	2213.19	1628.41	1740.63	1687.64	2527.12	2325.3	2284.87	1997.34	1901.19	1979.66	2616.31	2454.02	2093.55	1841.26	1866.3	1824.68
Rv1154c	Rv1154c	852.689	840.95	812.358	396.421	378.343	385.019	724.524	754.473	682.412	408.755	419.28	395.677	854.315	868.167	861.674	355.238	380.381	414.971	957.638	906.65	677.282	440.83	445.286	453.475
Rv1548c	PPE21	140.748	179.403	173.983	302.848	264.293	296.676	213.657	193.385	181.888	227.168	222.991	259.513	293.727	203.414	193.919	313.296	310.255	360.67	137.524	197.038	146.362	251.424	264.571	259.484
Rv1362c	Rv1362c	444.109	465.326	438.228	453.956	509.465	458.858	409.41	420.816	415.554	532.264	509.487	465.361	508.649	538.45	477.209	488.691	489.466	486.703	446.115	416.122	332.901	593.361	525.243	533.061
Rv1321	Rv1321	773.433	846.556	845.061	990.105	939.027	956.614	761.526	738.131	677.101	870.443	945.366	937.131	1158.79	1221.82	1131.47	935.44	978.931	953.965	1083.42	1021.01	929.828	1039.22	1000.43	970.784
Rv0979c	Rv0979c	16.3979	12.3339	9.15701	12.645	15.7074	7.25207	17.9042	6.80933	19.9147	11.0276	11.5465	16.8203	10.7461	19.9426	11.8038	13.9808	8.50012	16.0894	23.4797	19.2904	15.7841	15.9235	11.7009	15.7514
Rv2966c	Rv2966c	132.549	124.461	124.274	235.197	214.44	239.978	81.1658	76.2644	103.557	254.369	242.475	214.659	127.162	216.709	232.703	248.476	236.587	224.581	161.004	144.678	202.324	266.51	263.921	247.877
Rv0816c	thiX	42.3612	29.1529	34.0118	54.3736	43.7074	62.6315	39.3893	40.856	58.4166	61.7544	50.5157	63.2763	19.7012	35.8966	18.5488	47.0262	51.7091	61.6759	25.1569	53.7376	27.2635	67.0464	65.6553	58.8605
Rv3360	Rv3360	288.329	243.315	247.239	86.6184	81.2685	92.9583	229.174	284.63	313.325	63.2248	88.0417	84.9024	111.043	91.7359	118.038	83.8846	99.8765	95.1954	149.264	174.992	146.362	81.2938	94.2576	81.2441
Rv1337	Rv1337	4562.71	4557.95	4361.35	1879.68	2069.96	1860.49	6185.31	6201.93	6111.17	1835.72	1718.26	1762.13	3025.03	2734.79	2777.25	2186.08	2133.53	2259.88	2874.59	3032.73	2846.88	1870.6	1946.91	1988.82
Rv3542c	Rv3542c	412.68	421.596	368.897	213.701	187.805	210.969	523.997	551.555	479.281	177.912	175.362	188.227	345.666	312.434	291.721	235.766	229.503	286.927	333.748	352.739	305.638	200.301	187.865	203.939
Rv0394c	Rv0394c	381.25	309.47	337.501	834.571	842.051	809.595	298.404	261.478	302.704	596.224	643.715	676.816	374.323	364.284	342.309	798.174	810.345	792.401	221.38	235.619	281.244	688.064	707.257	694.72
Rv0098	fcoT	684.611	765.825	724.712	97.9989	98.3417	87.0248	94.2955	95.3306	124.799	62.4896	81.5468	85.7034	2330.11	1998.25	1971.23	88.9685	90.668	110.614	779.863	850.156	556.749	88.8365	73.4559	89.5343
Rv2821c	Rv2821c	582.124	566.24	546.804	208.643	162.537	188.554	712.588	689.104	706.309	159.532	156.599	155.387	612.528	562.381	664.383	159.508	201.17	193.743	659.11	607.648	439.085	182.701	172.914	159.172
Rv3604c	Rv3604c	1068.59	1009.14	1075.29	2334.9	2317.18	2287.04	1211.52	1184.82	1255.96	2360.64	2166.4	2161.81	929.538	1134.07	1015.12	2417.4	2394.91	2182.12	855.334	935.585	1325.87	2428.76	2504	2365.2
Rv1898	Rv1898	549.329	487.751	456.542	595.58	537.465	532.697	489.382	414.007	426.175	479.332	573.714	507.813	621.483	646.14	575.011	584.65	597.134	650.949	592.025	642.095	601.231	579.113	585.047	538.035
Rv1686c	Rv1686c	5840.37	6052.6	6370.66	162.488	167.318	179.983	5667.28	5422.95	5367.68	173.5	167.424	156.989	10273.3	10204	9100.69	180.479	182.753	182.346	6565.94	7519.13	6547.54	170.968	197.616	172.436
Rv2580c	hisS	1747.74	1768.24	1792.16	1664.08	1628.1	1694.35	2518.53	2493.57	2464.12	1544.6	1610.01	1489.8	1031.63	1286.96	1160.14	2060.89	1916.07	1938.77	1631.84	1616.26	1710.42	1760.81	1650.48	1656.38
Rv2568c	Rv2568c	233.67	246.679	221.076	271.868	245.171	245.252	293.629	271.011	244.287	243.342	231.651	273.129	277.608	210.062	220.899	242.121	262.796	263.463	298.528	257.665	253.981	273.214	271.722	269.432
Rv3411c	guaB2	6888.47	6877.85	7117.62	5285.62	5423.82	5310.49	8053.32	8094.93	8046.88	4938.88	4684.25	4956.38	4959.33	5563.98	5291.45	5477.92	5452.12	5355.75	6438.48	6166.04	7069.85	5196.94	5211.47	5483.15
Rv2663	Rv2663	271.931	284.802	277.327	118.863	107.903	119.33	254.24	230.155	227.028	113.952	121.959	118.543	453.127	361.625	455.288	112.482	114.043	114.637	296.851	383.053	246.806	140.797	122.86	123.524
Rv0097	Rv0097	1596.06	1686.39	1527.91	191.572	176.196	181.302	196.946	221.984	213.751	118.363	166.702	161.795	4319.93	4117.48	4412.92	192.553	187.711	187.709	1571.47	1601.1	1157.98	152.531	162.513	171.607
Rv2045c	lipT	2365.39	2428.66	2301.03	1586.95	1599.42	1618.53	2076.89	2164	2170.71	1301.99	1196.5	1274.34	2602.35	2762.71	2723.29	1685.32	1679.48	1760.44	1745.89	1851.88	1713.29	1389.54	1298.16	1428.4
Rv2794c	pptT	427.711	428.324	472.24	628.457	727.319	646.753	556.224	520.232	525.749	653.568	622.065	594.317	385.069	402.84	359.171	780.381	788.387	732.066	546.743	491.906	571.098	700.635	660.453	678.968
Rv1290c	Rv1290c	379.884	393.565	346.658	495.052	501.27	522.149	377.182	343.19	400.95	483.008	409.899	416.502	522.977	462.668	470.464	538.259	538.341	572.513	400.833	449.191	398.908	484.41	456.337	488.293
Rv3761c	fadE36	150.314	155.856	149.128	394.524	400.196	411.39	132.491	147.081	126.127	326.416	358.662	312.377	236.414	237.981	237.761	413.703	391.714	427.038	181.129	188.77	189.409	352.832	403.033	327.463
Rv3916c	Rv3916c	2161.79	2327.75	2277.48	1052.7	1059.22	1057.48	3394.64	3521.78	3449.23	1199.8	1096.19	1128.56	1697.88	1462.46	1477.16	1143.88	1105.02	1144.36	1853.22	1873.93	1631.5	1238.68	1198.05	1295.76
Rv0323c	Rv0323c	125.717	146.886	126.89	171.34	152.976	158.227	152.783	156.614	156.663	169.089	129.898	140.169	87.7598	79.7703	53.96	158.237	145.21	166.257	80.502	82.6732	74.6158	153.369	179.415	143.421
Rv2991	Rv2991	378.517	307.227	320.495	340.783	325.074	307.883	288.855	329.571	296.066	313.183	324.744	297.158	302.682	340.353	342.309	296.138	299.629	333.184	337.102	334.826	328.597	331.88	352.329	333.266
Rv1956	higA	404.481	384.595	337.501	111.908	131.122	110.759	358.084	373.151	323.946	144.094	145.774	147.378	302.682	255.265	247.879	115.659	137.419	138.771	370.645	394.076	352.99	160.911	159.263	155.856
Rv0624	vapC30	505.601	555.027	579.508	545	611.221	630.93	803.302	761.283	730.207	661.654	616.292	685.627	598.2	509.201	467.091	510.298	522.049	531.619	605.442	580.09	545.27	689.74	725.459	720.419
Rv3595c	PE_PGRS59	493.303	521.389	614.828	429.931	403.611	371.174	507.286	535.213	509.817	432.281	408.456	405.289	522.977	686.025	714.97	438.487	414.381	406.256	724.518	668.275	872.431	413.174	503.141	437.723
Rv2613c	Rv2613c	474.172	486.63	487.938	539.31	552.489	574.891	427.314	506.614	423.52	438.162	453.198	442.133	456.709	402.84	355.799	699.038	640.343	694.524	477.981	458.836	319.987	474.353	470.638	507.361
Rv0908	ctpE	1300.9	1256.94	1344.77	1433.31	1451.22	1449.1	2012.43	1980.15	1918.45	1370.36	1396.4	1392.08	1112.22	1048.98	1008.38	1518.82	1487.52	1584.8	1063.3	1014.12	1011.62	1547.1	1479.52	1502.19
Rv1834	lipZ	847.223	863.375	855.527	174.501	182.342	199.762	624.26	644.162	585.493	170.56	200.62	198.64	1067.45	1017.07	991.515	227.505	221.712	208.491	830.177	879.092	835.123	212.872	202.816	204.768
Rv2623	TB31.7	147562	146805	148358	2065.56	1952.49	2269.9	149667	147267	150391	1682.07	1506.09	1636.37	78509.2	85895.4	84079.8	2539.41	2200.82	2686.92	93115.6	91844.4	93137.8	1758.29	1707.04	1784.88
Rv1783	eccC5	24412.3	24279.9	24285.7	9945.94	10345.7	9984.78	19071.6	19352.1	18792.9	10090.2	10181.1	9996.86	26958.4	26494.4	26153.7	10695.9	10827	10705.5	22607.6	22729.6	21525.2	10826.3	11057.4	11037.6
Rv1759c	wag22	69.6909	54.9421	78.4887	53.1091	66.2441	52.083	28.6467	36.7704	45.1401	65.4303	60.6189	64.0773	77.0137	71.7933	104.548	66.7263	64.4593	57.6535	68.7621	108.853	176.495	59.5037	78.0063	68.8088
Rv0412c	Rv0412c	15791.1	16054.3	16591.2	4714.69	4696.5	4806.8	23119.1	22763.6	22636.4	5574.07	5488.17	5525.07	8673.9	9347.75	9082.14	4795.4	4475.32	4797.31	12900.4	13853.3	12759.3	6076.08	5892.73	6075.07
Rv3279c	birA	390.816	383.473	345.35	321.816	323.025	340.847	273.338	311.867	301.376	305.096	316.084	296.358	356.412	364.284	360.858	339.987	298.213	335.865	417.604	406.477	363.035	322.661	334.777	340.728
Rv3701c	egtD	869.087	907.105	920.934	1084.31	1064.69	1073.97	886.855	991.438	974.494	997.628	1118.56	1091.72	1122.97	1140.72	1144.96	1026.31	1073.85	1102.12	1220.95	1213.92	988.66	1180.02	1155.14	1153.17
Rv0160c	PE4	21.8638	42.6081	37.9362	32.877	30.0489	38.8975	21.4851	16.3424	18.5871	31.6124	31.7527	34.4415	111.043	69.1343	72.5088	35.5874	40.3756	38.8826	33.5425	39.9587	63.1365	35.1994	31.8526	39.793
Rv1589	bioB	859.522	808.433	852.91	1391.58	1434.83	1372.62	831.949	774.901	815.176	1262.29	1286.71	1240.7	779.092	732.557	728.46	1464.17	1480.44	1335.42	984.472	979.678	1024.53	1340.93	1456.12	1317.31
Rv3271c	Rv3271c	677.779	646.971	692.009	1283.47	1241.56	1222.3	330.631	354.085	371.742	1113.78	1161.14	1163	940.284	1030.37	979.711	1373.93	1243.85	1151.06	704.392	799.174	809.295	1242.03	1272.8	1220.32
Rv3101c	ftsX	608.088	625.667	592.59	828.881	874.832	866.293	589.645	536.575	564.251	782.223	777.942	764.122	696.706	639.492	632.344	885.236	941.389	993.518	546.743	496.039	453.435	805.395	829.467	892.856
Rv2166c	Rv2166c	2924.29	2935.48	3074.14	2367.78	2293.96	2425.49	6313.03	6014	5816.43	2970.83	3080.74	3040.47	2901.45	2669.65	2686.2	3007.13	3023.92	3422.34	4332.01	4469.86	3983.34	3374.11	3222.96	3287.07
Rv2024c	Rv2024c	2265.64	2299.72	2493.32	1568.61	1626.05	1641.6	2329.94	2266.14	2327.37	1524.01	1594.85	1557.88	1511.62	1721.71	1738.52	2013.86	1870.03	1844.91	2220.51	2305.2	2320.27	1670.29	1701.84	1710.27
Rv1109c	Rv1109c	6980.03	7397	7432.88	5860.33	5895.72	6120.75	4859.2	4953.1	4640.13	5284.41	5876.42	5706.88	12012.4	10641.4	11119.1	6155.98	6140.63	6504.12	10024.2	10054.4	8440.2	6211.01	5901.18	6221.8
Rv3812	PE_PGRS62	366.219	390.201	361.048	536.781	522.441	563.684	330.631	296.887	355.81	541.086	503.714	541.453	324.174	386.886	350.74	573.211	520.633	574.524	375.676	423.011	469.219	571.571	563.596	587.776
Rv3719	Rv3719	791.197	734.43	684.16	1191.79	1201.27	1228.24	833.143	804.862	758.088	1162.31	1170.52	1209.46	1090.73	951.926	917.32	1291.95	1360.02	1370.95	919.064	927.318	665.803	1302.38	1212.35	1333.89
Rv2422	Rv2422	1.36649	1.12127	0	3.7935	4.09757	1.31856	1.19361	8.17119	6.63824	2.94069	2.88661	4.8058	3.58203	3.98852	0	5.7194	4.25006	1.34078	3.35425	4.13366	0	5.02848	2.60021	4.14511
Rv2982c	gpdA2	582.124	631.273	648.84	947.744	918.539	947.384	575.322	627.82	625.323	828.538	883.303	842.617	626.856	695.331	659.324	1173.11	1093.68	1096.76	685.944	626.939	734.679	929.431	941.276	901.975
Rv0183	Rv0183	720.14	715.368	762.648	1219.61	1259.32	1295.48	710.2	747.664	698.343	1162.31	1096.19	1100.53	503.276	600.936	548.031	1134.35	1163.81	1161.79	563.514	498.795	638.539	1240.36	1239.65	1164.77
Rv1943c	mazE5	270.565	307.227	270.786	263.649	273.172	297.335	333.018	280.544	322.619	296.274	318.249	309.974	263.279	248.618	242.82	268.176	283.337	296.983	276.726	267.31	218.108	330.204	309.425	366.427
Rv2858c	aldC	616.287	595.393	542.88	1295.48	1374.74	1341.63	698.264	685.018	627.978	1214.5	1237.64	1250.31	814.913	813.657	799.283	1509.29	1462.73	1418.55	747.998	741.303	718.895	1280.59	1387.86	1344.67
Rv0317c	glpQ2	905.982	907.105	897.387	1189.26	1191.03	1266.48	1014.57	936.963	955.907	1081.44	993.716	940.334	1053.12	1023.72	957.79	1299.58	1299.1	1361.56	841.917	891.493	832.254	1069.39	1064.14	1143.22
Rv0004	Rv0004	624.485	533.723	617.444	685.992	687.026	693.562	568.16	680.933	634.616	595.489	612.684	632.763	598.2	675.389	630.658	739.074	719.677	729.384	654.079	673.787	565.358	625.208	665.654	706.326
Rv1718	Rv1718	162.612	162.584	138.663	347.738	357.172	369.856	112.2	159.338	154.007	377.878	415.672	386.867	179.102	175.495	153.449	384.471	388.881	335.195	199.578	194.282	190.844	445.021	428.385	407.878
Rv2482c	plsB2	7497.92	7564.07	7578.08	3553.25	3677.57	3728.22	7008.9	6372.17	6496.19	3022.29	2786.3	2967.58	8147.34	7592.81	7942.24	4001.04	4085.73	4081.33	5687.13	5756.81	5213.06	3271.03	3127.4	3124.58
Rv2287	yjcE	207.706	202.949	193.605	228.875	231.513	241.296	144.427	152.529	157.99	203.643	197.733	203.445	189.848	179.483	187.174	265.634	281.921	242.681	132.493	136.411	170.755	207.844	223.618	223.836
Rv1798	eccA5	3667.66	3389.59	3588.24	3648.72	3665.28	3707.13	4797.14	4658.94	4673.32	3392.82	3426.41	3446.56	3121.74	3136.3	3031.88	3762.73	3799.56	4093.4	3064.11	2948.68	2854.06	3737.84	3650.7	3748
Rv3747	Rv3747	277.397	322.925	245.931	1299.28	1341.27	1367.34	202.914	201.556	246.943	1107.17	1179.18	1298.37	496.112	413.476	384.465	1308.47	1318.94	1346.81	293.497	287.978	189.409	1307.41	1272.8	1307.37
Rv0920c	Rv0920c	195.408	239.951	210.611	658.173	629.66	660.598	132.491	149.805	183.216	500.652	528.972	577.497	299.1	324.399	264.741	726.364	737.386	789.719	229.766	217.706	185.105	571.571	559.045	612.647
Rv0603	Rv0603	8.19893	15.6977	17.0059	2.529	2.04879	10.5485	8.3553	6.80933	5.3106	5.88137	5.05157	4.8058	10.7461	7.97703	11.8038	3.81293	6.37509	4.69273	13.417	11.0231	12.9143	4.1904	8.45068	4.14511
Rv1363c	Rv1363c	273.298	311.712	311.338	363.544	380.391	371.174	365.246	367.704	366.431	385.23	443.817	415.701	367.158	426.771	397.955	420.058	420.048	441.117	278.403	319.67	360.165	435.802	460.237	452.646
Rv1628c	Rv1628c	1076.79	1078.66	962.794	629.722	632.392	635.545	1445.47	1528.01	1562.64	644.01	684.849	669.608	822.077	838.918	883.595	623.415	614.842	602.681	1496	1594.22	1103.45	761.815	706.607	698.865
Rv3567c	hsaB	814.427	865.618	829.364	320.551	298.44	313.817	1224.65	1212.06	1216.13	326.416	294.434	277.935	479.993	473.304	524.424	257.373	282.629	321.787	726.195	705.478	565.358	341.099	313.975	320.831
Rv1132	Rv1132	418.146	338.623	329.652	859.229	887.124	897.938	381.957	448.054	459.367	795.456	740.416	790.554	270.444	300.468	313.643	971.663	916.597	990.836	308.591	300.379	242.501	853.166	822.317	845.602
Rv0551c	fadD8	256.9	309.47	327.036	727.721	725.27	782.564	364.052	337.743	319.963	677.828	715.88	708.855	329.547	253.936	256.31	766.4	757.219	801.116	295.174	293.49	262.59	745.891	694.256	840.627
Rv2350c	plcB	162.612	193.979	163.518	2287.48	2146.45	2374.06	198.14	201.556	188.526	2173.17	2164.24	2197.85	247.16	211.391	237.761	2024.67	2020.2	2190.16	161.004	177.747	116.229	2339.92	2281.68	2457.22
Rv2196	qcrB	24208.7	24287.8	23958.7	19805.3	19895.1	20230	23749.3	23710.1	22758.6	14876.2	13724.4	14232.4	25129.8	24428.3	23531.6	21562.8	22102.4	22793.9	21668.5	21606.6	19813.4	15502	15258	15612.1
Rv1515c	Rv1515c	166.712	156.977	146.512	218.127	183.025	205.695	101.457	122.568	123.471	163.943	200.62	191.431	250.742	163.529	192.233	197.002	213.92	237.988	184.484	181.881	179.365	196.949	209.317	194.82
Rv0857	Rv0857	1158.78	1150.42	1166.87	830.777	784.685	853.107	1403.69	1620.62	1424.57	741.053	776.499	786.549	1038.79	961.232	994.888	824.865	830.179	890.948	1071.68	1310.37	928.393	804.557	817.766	872.13
Rv1618	tesB1	695.543	671.639	706.398	1560.39	1649.27	1662.7	751.977	622.372	673.118	1459.32	1536.4	1424.92	1004.76	927.995	893.713	1868.34	1878.53	1942.79	820.114	771.617	694.501	1619.17	1614.73	1551.1
Rv1112	Rv1112	34.1622	40.3656	51.0176	101.16	108.586	103.507	48.9382	51.7509	49.123	108.805	101.031	104.927	44.7754	31.9081	43.8425	95.9588	117.585	97.2065	98.9504	60.627	67.4412	115.655	113.109	111.918
Rv0017c	rodA	1816.06	1908.4	1788.23	2568.83	2664.11	2668.1	2335.9	2341.05	2457.48	2443.71	2163.52	2384.48	1801.76	1612.69	1681.19	2480.95	2479.91	2682.23	1755.95	1788.5	1558.32	2463.96	2491	2608.93
Rv3071	Rv3071	196.774	174.918	159.594	178.927	139.317	156.908	192.172	172.957	169.939	163.943	145.052	179.416	186.266	143.587	166.939	203.992	205.42	188.38	174.421	152.945	162.146	167.616	188.515	169.949
Rv2912c	Rv2912c	184.476	208.556	205.379	117.599	123.61	140.426	348.535	317.315	330.585	133.066	132.784	121.747	236.414	182.142	210.781	115.024	125.377	123.352	201.255	221.84	212.368	138.283	148.862	130.985
Rv3621c	PPE65	91.5548	94.1864	86.3375	45.5221	46.4392	54.7202	82.3594	68.0933	61.0719	58.8137	57.7323	46.456	98.5059	58.4982	96.1163	52.1101	67.2927	42.2346	85.5334	73.028	113.359	69.5607	59.8048	47.2542
Rv2674	msrB	900.516	793.857	875.149	1362.5	1439.61	1394.38	694.684	674.123	686.395	1065.26	1060.83	1163.8	1162.37	1017.07	956.104	1366.94	1420.23	1482.23	731.226	710.99	533.79	1178.34	1166.84	1209.54
Rv0867c	rpfA	418.146	449.628	383.286	979.989	1087.22	1010.02	321.082	283.268	333.24	1468.87	1620.11	1519.43	1167.74	1223.14	1180.38	971.027	987.431	867.485	1118.64	1100.93	1436.35	1700.46	1686.89	1591.72
Rv2803	Rv2803	73.7904	61.6697	66.7154	101.16	106.537	114.055	31.034	29.961	34.5189	79.3985	106.805	132.159	77.0137	114.337	75.8813	103.585	102.71	84.4691	63.7307	59.2491	66.0063	115.655	120.91	106.115
Rv3033	Rv3033	116.152	122.218	102.035	87.2506	109.952	96.2547	59.6807	62.6458	59.7442	97.0427	110.413	93.7131	146.863	146.246	166.939	82.6136	89.2513	97.2065	132.493	67.5165	74.6158	118.169	110.509	96.9955
Rv1296	thrB	619.019	658.184	663.229	685.36	705.465	690.924	722.137	729.96	727.552	607.987	570.106	547.861	610.737	643.481	598.619	774.026	850.721	823.909	642.339	651.74	843.733	646.16	598.698	621.766
Rv0880	Rv0880	64.225	45.9719	69.3317	109.379	103.122	100.21	39.3893	44.9415	43.8124	80.8689	98.8665	108.13	85.9688	111.678	96.1163	88.333	90.668	103.24	88.8876	104.719	119.098	84.6461	120.26	103.628
Rv2068c	blaC	717.407	639.122	664.537	1686.21	1604.88	1691.05	586.065	601.944	598.77	1530.63	1565.99	1620.35	902.673	894.757	949.359	1549.32	1454.94	1608.94	848.625	868.069	803.555	1697.95	1718.74	1672.14
Rv3291c	lrpA	77.8899	71.7611	71.948	89.7796	76.488	71.8614	54.9063	44.9415	55.7613	89.6909	89.485	84.1015	85.9688	114.337	111.293	62.9134	75.0844	81.1172	83.8562	89.5626	73.1809	88.8365	87.1071	109.431
Rv3254	Rv3254	956.542	1022.6	987.649	727.721	758.734	763.445	868.951	818.481	795.262	704.294	706.498	758.515	1219.68	1167.31	1212.41	771.484	815.304	848.043	1066.65	1037.55	901.13	769.358	789.164	779.28
Rv1110	lytB2	4148.66	4247.36	4204.38	1901.81	1924.49	1953.44	4491.57	4973.53	4820.69	1865.87	1786.81	1895.09	3032.19	3289.2	3288.19	1760.94	1743.94	1753.07	3865.77	3887.02	3165.43	2005.53	2030.76	1946.54
Rv2152c	murC	1460.78	1375.79	1531.84	2401.92	2378.64	2451.2	1852.49	1793.58	1886.59	2538.55	2577.75	2547.87	1183.86	1201.87	1171.94	2969.64	2804.33	2710.39	1370.21	1255.25	1307.21	2701.13	2783.53	2773.08
Rv1513	Rv1513	427.711	415.99	470.932	551.955	544.977	552.476	430.895	390.855	326.602	507.268	487.116	519.827	490.739	470.645	536.228	578.931	610.592	637.541	456.178	486.394	427.606	488.601	587.648	551.299
Rv3862c	whiB6	1896.69	1742.45	1707.13	741.63	695.904	725.207	837.917	1064.98	1020.96	849.858	781.55	843.417	2525.33	2890.34	3033.56	629.134	836.554	661.005	1992.42	2106.79	2165.29	869.927	919.824	875.446
Rv0429c	def	98.3872	104.278	92.8783	423.608	422.05	445.013	108.619	113.035	91.6078	369.791	429.384	422.91	180.893	138.269	146.704	412.432	400.214	428.379	159.327	180.503	133.448	451.725	436.835	427.775
Rv1999c	Rv1999c	19.1308	16.819	32.7036	15.8063	15.7074	21.7562	34.6148	29.961	19.9147	24.2607	24.5362	22.4271	30.4473	15.9541	21.9213	23.5131	18.4169	14.0782	31.8654	27.5577	34.4381	25.1424	26.0021	25.6997
Rv1795	eccD5	6709.46	6674.9	6624.44	4467.48	4404.21	4477.16	6964.74	7068.08	7186.56	4844.78	4351.57	4600.75	6800.49	6967.94	6770.3	4485.92	4415.81	4290.5	6285.86	6048.92	5973.57	4969.82	5020.36	4866.35
Rv2219	Rv2219	2149.49	2220.11	2072.1	1635	1625.37	1720.06	2123.44	2124.51	2104.32	1482.84	1557.33	1404.09	1896.69	2131.2	2195.5	2109.19	2102.36	2056.76	1702.28	1643.82	1853.92	1626.71	1575.73	1587.58
Rv2797c	Rv2797c	187.209	209.677	219.768	440.047	362.635	383.7	189.785	186.576	180.56	391.846	415.672	366.843	275.817	259.254	254.624	400.994	376.131	392.849	241.506	217.706	317.117	416.526	419.934	429.433
Rv0484c	Rv0484c	435.91	422.718	414.682	420.447	445.27	463.473	491.769	565.174	535.043	482.273	474.848	470.167	334.92	385.557	340.623	402.9	400.923	370.055	439.407	498.795	614.146	512.905	533.043	489.122
Rv2264c	Rv2264c	385.35	381.231	418.606	357.222	384.489	410.731	392.699	396.303	410.244	369.056	366.6	375.653	488.948	479.951	524.424	347.612	360.547	363.351	425.99	467.104	519.441	403.117	397.182	395.443
Rv2586c	secF	2802.67	3073.39	2940.71	3871.9	3830.55	3998.53	2813.35	2597.08	2652.64	3513.39	3414.86	3407.31	3526.51	3479.32	3566.42	4382.33	4184.89	4279.77	3188.21	3328.97	2901.41	3802.37	3587.64	3735.57
Rv2375	Rv2375	252.8	279.195	259.013	496.949	492.392	434.465	237.529	187.937	223.045	449.19	465.466	432.522	343.875	288.503	303.525	442.3	441.298	434.413	209.641	252.153	261.155	512.067	443.336	497.413
Rv1868	Rv1868	1352.82	1300.67	1412.8	608.225	603.709	582.143	1556.47	1513.03	1359.51	692.532	684.849	680.02	1334.31	1422.57	1359.12	617.06	605.634	610.055	1425.56	1585.95	1611.42	702.311	718.308	793.373
Rv3107c	agpS	914.181	829.737	863.375	505.168	510.148	489.185	593.226	642.8	681.084	518.296	526.085	527.036	959.985	1084.88	1099.44	475.981	493.716	410.949	878.813	843.267	891.085	566.542	566.196	556.273
Rv2107	PE22	42.3612	37.0018	36.6281	6.95476	14.3415	13.1856	69.2296	68.0933	61.0719	13.9683	25.2579	19.2232	57.3125	43.8737	57.3325	8.26136	11.3335	16.7597	55.3451	45.4703	34.4381	19.2758	23.4019	19.8965
Rv3364c	Rv3364c	98.3872	127.824	130.814	324.977	306.635	278.875	107.425	125.292	106.212	221.287	241.754	241.091	213.131	222.027	202.35	295.502	272.712	272.178	179.452	165.346	220.978	251.424	268.472	234.613
Rv2834c	ugpE	53.2931	69.5185	54.9421	167.546	155.025	189.872	63.2616	53.1127	59.7442	144.094	161.65	160.193	68.0586	65.1458	70.8225	183.021	216.753	178.994	48.6366	52.3597	60.2666	165.102	157.313	179.069
Rv0514	Rv0514	217.272	265.74	255.088	502.639	530.636	490.504	349.729	359.532	359.793	495.506	386.806	417.303	272.235	280.526	283.29	593.547	559.592	472.625	233.12	248.02	390.298	408.983	484.289	502.387
Rv3067	Rv3067	181.743	196.222	175.291	132.773	142.732	151.634	313.921	265.564	260.219	142.623	131.341	172.208	109.252	126.303	128.155	137.266	134.585	116.648	117.399	129.521	137.752	136.607	171.614	168.291
Rv0316	Rv0316	47.8271	45.9719	31.3955	447.634	502.636	450.288	38.1957	47.6653	30.5359	563.141	464.745	447.74	60.8946	110.349	102.861	502.672	527.716	435.753	82.1791	86.8069	129.143	515.419	562.946	505.703
Rv1685c	Rv1685c	1921.28	1833.27	2022.39	105.586	78.5368	87.6841	2529.27	2402.33	2433.58	97.0427	99.5881	106.529	2385.63	2177.73	2084.21	107.398	105.543	115.307	2052.8	1980.02	1800.82	103.922	109.859	111.089
Rv2883c	pyrH	2169.98	2210.02	2086.49	3148.61	3157.18	3128.28	2594.92	2661.08	2515.89	2785.57	3111.05	2818.6	1629.83	1590.09	1406.33	3530.14	3722.35	3646.92	1786.14	1705.82	1569.8	3154.53	3086.45	3117.95
Rv0805	Rv0805	9323.55	9311	9005.27	5064.33	4805.09	5227.42	10355.8	9862.63	10003.8	4877.86	4529.82	4884.29	13337.7	12492	11980.8	6180.77	5764.5	6612.06	8690.86	9583.2	8001.11	5062.84	5022.96	5256.82
Rv0149	Rv0149	2133.09	2075.46	2183.29	1220.88	1232	1151.1	2073.31	2188.52	2079.1	1138.05	1172.69	1077.3	2197.58	2438.31	2333.77	1162.94	1278.56	1202.68	2287.6	2138.48	2053.37	1217.73	1216.9	1202.91
Rv3132c	devS	54591.2	55323.3	54488.1	1572.41	1467.61	1553.26	57461.8	57976	55194.4	1441.67	1407.95	1419.31	40016.7	39282.9	40282.8	1704.38	1633.44	1840.22	46426.2	46937.7	40974.1	1487.59	1501.62	1593.38
Rv2072c	cobL	180.377	160.341	201.454	146.682	134.537	124.604	158.751	198.832	169.939	155.856	150.104	159.392	207.758	188.79	180.429	134.088	152.294	140.782	219.703	216.328	294.159	155.045	176.164	166.633
Rv0991c	Rv0991c	1069.96	1032.69	974.568	135.302	147.513	148.338	1315.36	1292.41	1180.28	158.797	156.599	156.989	999.387	975.857	1057.28	155.695	139.544	154.86	989.504	971.41	747.593	170.968	173.564	161.659
Rv0735	sigL	65.5915	56.0633	58.8665	129.611	124.976	116.033	59.6807	76.2644	70.3654	124.979	144.331	116.14	78.8047	95.7244	82.6263	131.546	113.335	132.067	83.8562	103.342	110.489	137.445	155.363	119.379
Rv2183c	Rv2183c	513.8	569.604	503.636	737.204	757.368	673.783	492.963	471.205	462.022	702.089	700.725	664.001	829.241	779.09	750.381	771.484	786.97	766.926	701.038	795.041	779.161	756.786	727.409	734.513
Rv3634c	galE1	291.062	239.951	272.094	551.323	566.831	544.564	250.659	223.346	227.028	499.182	503.714	502.206	299.1	296.48	300.153	599.902	573.758	643.574	280.08	307.269	275.505	542.238	538.894	532.232
Rv0941c	Rv0941c	1074.06	1057.35	1139.39	1108.34	1064	1075.94	1113.64	1206.61	1120.54	987.335	1055.78	1033.25	1581.47	1473.09	1360.8	1187.73	1180.81	1234.19	1091.81	1404.07	1143.63	1102.08	1066.09	1130.78
Rv1838c	vapC13	113.419	116.612	112.5	184.617	164.586	190.532	149.202	148.443	147.369	244.077	219.383	226.673	128.953	150.234	119.724	189.376	213.92	220.558	161.004	163.969	110.489	246.396	236.619	257.826
Rv2192c	trpD	535.664	546.057	639.683	808.016	834.539	837.944	593.226	584.24	570.889	722.674	724.54	616.744	397.606	527.814	419.876	976.747	910.93	847.373	551.774	538.754	832.254	743.377	751.461	717.932
Rv3773c	Rv3773c	718.773	704.156	698.549	536.149	471.904	555.113	602.775	524.318	549.647	449.19	454.641	478.177	1051.33	981.175	1026.93	446.113	483.799	514.86	742.966	701.344	684.457	505.362	498.59	475.858
Rv2976c	ung	1307.73	1318.61	1305.53	345.209	326.44	352.714	1095.74	1195.72	1170.99	408.02	362.992	390.071	863.27	849.554	833.008	418.787	444.84	394.86	1422.2	1501.9	1533.93	376.298	443.986	418.656
Rv0211	pckA	42824.4	42503.9	42049	6774.57	6564.99	7133.4	41876.8	41929.1	40217.1	5709.34	5589.93	5855.06	34740.4	34193.5	34964.4	6741.27	6596.81	7367.59	17229.1	17959.4	16161.5	6155.7	5975.28	6240.04
Rv2535c	pepQ	1796.93	1609.02	1843.18	2005.5	2066.54	1991.02	1614.96	1544.35	1522.81	1885.72	1861.14	1835.81	1894.9	2051.43	1996.52	2090.76	1997.53	2010.5	2057.83	2146.75	3125.26	1944.35	2024.91	2007.06
Rv1102c	mazF3	1000.27	1021.47	956.254	854.803	887.807	929.583	1452.63	1367.31	1540.07	1193.92	1094.75	1222.27	843.569	755.159	740.264	885.872	840.804	975.417	962.67	1043.06	763.377	1241.2	1249.4	1266.74
Rv2594c	ruvC	859.522	815.161	873.841	1177.25	1154.15	1299.44	728.105	663.228	623.995	1432.85	1482.28	1352.03	791.63	773.772	893.713	1351.05	1261.56	1285.81	1184.05	1295.21	1370.35	1504.35	1554.28	1508.82
Rv2147c	Rv2147c	895.05	868.982	900.004	7329.05	7125.68	7318.66	821.207	882.489	949.269	7362.74	7653.85	7037.29	786.256	818.975	743.636	6956.06	6871.64	6669.04	598.734	653.118	618.45	7863.71	7826.63	7913.01
Rv3527	Rv3527	759.768	818.525	780.962	246.578	230.83	261.074	1199.58	1295.13	1120.54	288.187	281.445	293.955	700.288	602.266	632.344	226.234	245.795	242.011	937.513	1033.42	825.079	301.709	310.725	310.883
Rv1006	Rv1006	1376.05	1466.62	1391.87	4721.65	4730.65	4711.21	1551.7	1404.08	1512.19	3983.89	4017.44	4063.3	2278.17	2296.06	2188.75	5292.35	5353.66	5324.91	2091.37	1832.59	2043.33	4342.09	4249.39	4316.71
Rv3884c	eccA2	658.648	680.609	680.235	1012.23	1001.86	1012.65	639.777	635.991	700.999	924.846	880.417	901.087	847.151	858.86	762.185	1010.43	1018.6	1061.23	580.285	644.851	529.485	975.525	957.528	962.493
Rv0073	Rv0073	690.077	634.637	606.979	1246.8	1259.32	1244.06	568.16	593.773	556.285	1072.62	1156.81	1105.33	1112.22	958.573	957.79	1188.36	1296.98	1308.6	966.024	963.143	789.206	1205.16	1140.19	1223.64
Rv1381	pyrC	519.266	552.785	550.729	334.461	318.245	321.069	590.839	595.135	649.22	303.626	285.775	288.348	460.291	497.235	492.385	366.042	361.255	342.569	1026.4	870.824	1256.99	344.451	309.425	285.183
Rv2550c	vapB20	61.492	66.1547	64.0991	182.72	180.293	196.465	48.9382	74.9026	75.676	205.848	229.486	217.863	93.1329	93.0654	96.1163	175.395	172.836	158.212	90.5647	90.9405	114.794	243.043	234.019	221.349
Rv0364	Rv0364	483.737	521.389	544.188	1318.24	1332.39	1427.34	404.635	390.855	391.656	1165.98	1228.25	1215.07	786.256	694.002	708.225	1307.2	1289.19	1412.51	519.909	520.841	495.047	1325.84	1298.16	1233.58
Rv3631	Rv3631	330.69	366.654	313.955	472.924	486.928	450.288	296.016	311.867	319.963	424.194	488.559	462.958	245.369	283.185	279.918	416.881	446.257	460.558	234.797	301.757	252.546	480.22	482.989	508.19
Rv2226	Rv2226	541.13	585.301	576.892	763.127	790.149	813.55	470.284	433.073	476.626	780.017	794.54	800.966	515.813	623.538	620.54	754.961	762.886	682.457	640.662	529.109	667.238	867.413	874.321	795.86
Rv1259	udgB	122.984	108.763	139.971	91.6764	96.293	62.6315	84.7466	103.502	104.884	93.3668	76.4952	69.6841	73.4317	93.0654	97.8025	102.314	106.96	94.525	105.659	100.586	147.797	95.5411	91.6574	68.8088
Rv3367	PE_PGRS51	456.407	479.902	501.019	335.725	383.123	327.002	401.054	373.151	479.281	398.463	387.528	386.066	542.678	590.3	534.541	351.425	349.922	315.083	553.451	592.491	809.295	427.421	415.384	410.365
Rv3694c	Rv3694c	2369.49	2295.23	2301.03	2240.7	2342.45	2194.74	2439.75	2528.98	2331.35	1956.29	1937.64	1818.99	2475.19	2482.19	2453.49	2520.98	2474.24	2499.88	1826.39	1883.57	1678.86	2051.62	1996.96	2062.6
RVnc0003	ASpks	0	0	0	0	0	0	0	0	0	0	0	0	0	0	0	0	0	0	0	0	0	0	0	0.829021
Rv0042c	Rv0042c	270.565	320.682	291.716	718.869	723.222	737.733	288.855	283.268	269.513	614.603	594.642	634.365	463.873	456.02	448.543	770.848	779.886	801.786	296.851	292.112	269.765	672.14	633.151	666.533
Rv3240c	secA1	11046.7	10903.2	10317.3	5156.64	5078.26	5229.4	11124.5	11247.6	10496.4	5305	5483.84	5147.81	9746.71	9610.99	9680.76	5296.17	5418.83	5517.31	10425	10144	9464.73	5712.35	5650.91	5657.24
Rv3211	rhlE	11257.1	11022.1	11499.9	9741.72	9324.71	8906.2	15247.2	14739.5	14345.2	9687.36	10117.6	8840.26	9390.3	9846.32	9832.53	10352.8	9829.69	9131.38	13336.5	13120.2	16180.2	9966.45	10478.8	10141.4
Rv1348	irtA	7873.71	8084.33	7922.12	329.403	304.586	332.277	5096.73	4725.67	4823.35	445.514	430.827	446.939	15186	15970	15938.4	404.171	372.589	380.111	17831.2	17817.5	17570.6	460.106	470.638	481.661
Rv1028c	kdpD	1449.84	1351.13	1440.27	749.217	697.27	705.429	1420.4	1330.54	1277.2	696.943	645.88	668.807	1294.91	1369.39	1490.65	695.225	689.927	692.513	1222.62	1231.83	1414.83	699.797	725.459	721.248
Rv1159	pimE	982.506	1002.41	919.626	1024.25	1005.95	1050.23	925.051	877.041	876.248	895.439	792.375	819.388	1115.8	1041	947.673	991.998	916.597	1000.89	897.262	920.428	736.114	845.623	885.372	945.913
Rv0772	purD	282.863	311.712	321.804	478.614	463.026	418.642	226.787	227.431	248.27	459.482	405.569	445.337	490.739	518.507	462.033	517.288	558.883	447.821	402.51	341.716	421.866	473.515	464.138	460.936
Rv2153c	murG	832.192	833.101	837.213	804.855	880.978	835.307	814.045	817.119	882.887	1077.03	922.273	899.485	521.186	634.174	630.658	1120.37	1013.64	876.2	670.85	618.671	1541.1	1041.73	1058.29	996.483
Rv1713	engA	1097.29	1189.66	1121.08	2922.26	2871.72	2819.08	970.408	965.562	950.597	2664.26	2663.62	2726.49	1551.02	1741.65	1730.09	3288.66	3041.63	2896.76	1408.78	1419.22	1565.5	2813.44	2912.89	2867.58
Rv0103c	ctpB	3372.49	3187.76	3248.12	1683.68	1702.54	1623.8	2035.11	1976.07	2100.34	1507.1	1561.66	1397.69	6143.19	6511.92	6525.79	1875.33	1873.57	1767.15	3040.63	3091.98	3252.96	1542.91	1701.84	1514.62
Rv0574c	Rv0574c	8409.37	8274.95	8577.5	256.062	267.025	284.149	5620.73	5964.97	5882.81	196.291	231.651	226.673	8987.32	8592.59	8233.96	245.299	275.546	270.167	7825.46	7880.13	7463.02	238.015	232.069	227.981
Rv2806	Rv2806	16.3979	20.1828	19.6222	31.6125	40.9757	32.3047	15.517	12.2568	21.2424	34.5531	44.0208	28.8348	25.0742	10.636	16.8625	26.0551	33.2922	36.8714	23.4797	22.0462	8.60952	41.0659	43.5535	29.8448
Rv3190c	Rv3190c	871.82	824.131	864.684	1077.36	1061.27	1104.95	814.045	751.75	763.398	1023.36	1042.07	1126.96	791.63	753.83	789.165	1174.38	1253.77	1226.14	885.522	990.701	786.336	1123.03	1136.94	1142.39
Rv1097c	Rv1097c	684.611	650.335	651.456	2037.74	2075.42	2076.07	877.306	787.158	789.951	1983.49	1867.64	1917.51	725.362	728.569	661.01	2344.95	2287.95	2351.06	642.339	626.939	576.838	1997.15	2039.22	2114
Rv1394c	cyp132	1087.73	1136.96	1089.68	540.574	530.636	592.033	828.368	821.205	815.176	489.624	505.879	506.211	1495.5	1566.16	1600.25	576.389	595.717	615.418	1148.83	1118.84	987.225	559.838	496.64	548.812
Rv1374c	Rv1374c	24.5968	42.6081	34.0118	41.0963	44.3904	52.083	51.3254	46.3034	45.1401	40.4344	41.8559	51.2618	32.2383	33.2376	23.6075	45.7552	38.9589	58.9943	38.5739	37.2029	28.6984	38.5517	55.2545	47.2542
Rv0641	rplA	7287.49	7337.57	7256.28	8254.67	8145.29	8091.33	9190.83	9271.58	8773.1	7762.68	7624.99	7626	7491.82	7078.29	6832.69	7957.59	8192.7	8121.1	9220.83	9247	8952.46	8036.35	8289.47	8198.19
Rv0640	rplK	3230.38	3296.52	3342.31	4062.21	4113.96	4063.8	3084.3	3031.51	2911.53	3667.77	3697.75	3865.46	4149.79	3993.83	3900.3	4190.41	4246.52	4167.14	4395.74	4068.9	3630.35	4111.62	3828.16	4031.53
Rv0546c	Rv0546c	204.973	140.158	162.21	605.696	634.441	661.916	189.785	190.661	180.56	527.853	501.549	543.055	202.385	214.05	190.546	638.666	648.843	666.368	149.264	152.945	146.362	594.199	550.595	530.573
Rv3530c	Rv3530c	322.491	279.195	332.269	71.4443	86.732	101.529	405.829	415.369	476.626	81.604	79.3818	86.5044	116.416	140.928	123.096	69.9038	81.4595	92.5138	181.129	205.305	183.67	83.808	100.758	77.099
Rv1941	Rv1941	129.816	124.461	129.506	303.48	342.83	271.623	158.751	196.109	132.765	233.049	241.032	252.304	109.252	140.928	139.959	354.603	303.171	331.843	103.982	107.475	101.879	248.072	269.122	255.338
Rv0530A	Rv0530A	1842.03	1777.21	1652.19	450.795	497.172	450.947	1651.96	1943.38	2002.09	476.391	363.713	425.313	1051.33	987.823	908.889	384.471	439.881	482.01	1137.09	1306.24	1231.16	434.126	452.437	460.936
Rv0801	Rv0801	750.202	687.337	671.078	580.406	649.465	642.797	417.765	479.376	420.865	525.648	557.116	533.444	1103.27	1023.72	966.221	578.295	604.217	620.781	697.684	675.165	622.755	590.008	538.894	596.066
Rv1893	Rv1893	1016.67	1012.5	1032.13	756.804	774.441	811.572	744.815	807.586	816.504	800.602	770.004	859.437	1230.43	1247.08	1227.59	716.196	795.47	756.87	1373.57	1171.2	1030.27	905.965	811.916	871.301
Rv2067c	Rv2067c	524.732	497.842	469.624	1314.45	1234.74	1350.2	497.737	482.1	489.902	1300.52	1234.75	1263.12	832.823	850.883	811.086	1326.27	1391.19	1433.96	650.724	717.879	558.184	1402.11	1322.21	1320.63
Rv0140	Rv0140	3119.69	3124.97	3102.92	304.745	274.537	315.795	3463.87	3427.81	3175.74	275.689	287.94	269.926	1373.71	1224.47	1340.57	346.977	360.547	335.195	1051.56	934.207	815.034	298.357	273.022	319.173
Rv0038	Rv0038	3254.98	3453.5	3406.41	2739.54	2780.89	2786.77	3701.4	3607.58	3394.8	2609.86	2774.03	2652.8	3719.94	3817.01	3832.85	2661.43	2798.67	2880.67	3585.69	3594.91	3087.95	2878.81	2739.97	2935.56
Rv3264c	manB	2711.11	2882.78	2905.39	3374.32	3536.89	3430.23	3897.15	3894.93	3826.28	3196.53	3349.19	3345.64	2306.83	2202.99	2225.85	3586.06	3482.93	3574.52	2792.41	2657.94	2397.75	3558.49	3467.38	3495.98
Rv2258c	Rv2258c	910.082	1005.78	923.55	2413.3	2570.54	2390.55	617.099	679.571	685.067	2005.55	2110.84	2055.28	1112.22	1211.18	1239.39	2744.68	2771.04	2633.29	1175.66	1128.49	1116.37	2230.97	2153.62	2181.98
Rv0809	purM	1202.51	1126.87	1105.38	1425.73	1448.49	1398.99	1534.99	1538.91	1575.92	1386.53	1378.36	1445.74	933.12	941.29	892.026	1456.54	1477.61	1514.41	860.365	1007.24	886.78	1458.26	1543.87	1469.85
Rv3703c	etgB	1020.77	1127.99	1084.45	961.653	1006.64	942.769	1058.74	1152.14	1124.52	1015.27	957.634	977.179	1196.4	1366.73	1202.3	946.879	1022.14	951.954	1277.97	1275.92	1397.61	1013.24	1079.09	1042.08
Rv1038c	esxJ	12.2984	22.4253	11.7733	20.8643	10.9269	20.4377	7.16169	10.8949	2.6553	13.2331	20.9279	15.2184	17.9102	13.2951	30.3525	20.3356	16.2919	13.4078	31.8654	13.7789	15.7841	14.2474	21.4517	16.5804
Rv3220c	Rv3220c	2995.34	3065.54	2960.33	4183.6	4187.72	4200.27	4208.68	4338.9	4073.23	3969.19	3833.42	3907.91	2339.07	2338.6	2338.83	4310.52	4284.06	4482.23	2550.91	2349.3	2272.91	4114.97	4088.83	4249.56
Rv2080	lppJ	327.957	333.016	306.106	467.233	444.587	494.459	223.206	269.649	228.356	459.482	474.126	499.803	440.59	377.58	414.818	495.046	485.924	445.809	392.447	332.071	282.679	509.553	498.59	515.651
Rv1457c	Rv1457c	460.507	468.69	472.24	574.084	595.514	613.13	429.701	438.521	471.315	543.292	507.322	551.065	469.246	486.599	507.561	580.201	639.634	554.413	466.241	465.726	437.651	587.494	555.145	560.418
Rv2385	mbtJ	409.947	376.746	364.972	66.3863	84.0002	71.8614	410.603	434.435	422.192	75.7227	85.8767	80.8976	426.262	470.645	502.503	80.7071	63.0426	83.7987	477.981	446.435	454.87	82.1319	91.0074	83.7311
Rv0622	Rv0622	496.035	519.147	494.479	97.9989	75.8051	106.803	429.701	449.415	431.486	108.805	90.9283	107.329	472.828	479.951	470.464	112.482	126.085	126.704	405.864	407.855	423.301	110.627	114.409	99.4825
Rv2098c	PE_PGRS36	17.7644	13.4552	19.6222	20.232	19.122	9.88919	10.7425	10.8949	11.9488	19.1145	18.763	16.0193	19.7012	14.6246	20.235	22.8776	18.4169	15.419	21.8026	19.2904	76.0508	20.952	17.5514	19.0675
Rv1655	argD	4736.25	4684.65	5036.36	1103.28	1135.71	1019.9	3116.53	3133.65	3315.14	1532.83	1497.43	1372.06	3825.61	5073.39	4869.89	1216.96	1168.77	931.842	6468.67	6543.58	13224.2	1564.7	1643.33	1468.2
Rv2178c	aroG	4334.5	4332.58	4191.3	4970.76	4799.62	4899.1	4778.04	4893.18	4584.37	5055.78	4935.39	5022.86	4497.24	4221.18	4144.8	4788.41	5017.2	5239.1	4794.9	4512.58	4167.01	5267.33	5253.73	5418.48
Rv3171c	hpx	3054.1	3024.06	3089.84	4753.89	4855.62	4837.79	1931.27	2125.87	2129.55	3548.67	3073.52	3380.88	4654.85	4940.44	4750.17	6282.44	5816.92	5638.65	1823.03	1732	2090.68	3563.52	3456.98	3599.61
Rv3112	moaD1	12.2984	10.0914	11.7733	8.85151	11.6098	15.8227	13.1298	10.8949	2.6553	17.6441	40.4126	39.2473	16.1192	13.2951	10.1175	13.9808	8.50012	14.0782	21.8026	22.0462	18.654	31.847	36.4029	34.8189
Rv1419	Rv1419	1586.49	1646.02	1597.24	960.389	897.368	965.844	1896.65	1884.82	1769.76	1074.09	1138.05	1208.66	2068.62	1805.47	1858.25	1026.95	1066.06	1128.94	1420.52	1472.96	1149.37	1209.35	1168.79	1252.65
Rv2747	argA	135.282	158.099	177.908	135.934	133.854	136.471	139.653	128.015	144.714	133.801	129.898	135.363	121.789	89.0769	131.528	122.014	138.127	133.408	164.358	139.167	124.838	139.959	130.661	154.198
Rv2325c	Rv2325c	2372.22	2325.51	2359.89	1640.06	1598.05	1582.27	2599.69	2530.35	2638.04	1469.61	1320.63	1363.24	1674.6	1829.4	1827.9	1893.12	1877.11	1781.9	1673.77	1698.93	2169.6	1441.5	1490.57	1474.83
Rv0963c	Rv0963c	76.5234	103.157	66.7154	120.128	102.439	124.604	114.587	106.225	107.54	113.952	112.578	125.752	69.8497	74.4523	91.0575	119.472	110.502	117.989	73.7935	85.429	64.5714	130.741	118.31	125.182
Rv1416	ribH	1867.99	1814.21	1894.19	1549.01	1519.52	1541.39	2290.55	2095.91	2128.22	1455.64	1387.74	1468.97	1703.26	1711.07	1682.88	1762.21	1659.65	1720.89	1869.99	1716.85	1797.95	1522.79	1513.97	1537.83
Rv0411c	glnH	8048.62	8249.16	8110.5	1729.21	1749.66	1805.77	11397.8	10839.1	11308.9	2105.53	2087.02	2266.73	3716.36	3495.27	3596.77	1854.36	1750.32	1899.89	5350.03	5117.47	4851.46	2316.45	2260.23	2273.18
Rv2309A	Rv2309A	1.36649	2.24253	9.15701	8.85151	8.87807	7.25207	7.16169	2.72373	3.98295	2.94069	4.32992	5.60676	14.3281	10.636	8.43125	8.26136	10.6252	14.0782	11.7399	11.0231	7.1746	2.51424	5.20042	5.80315
Rv3122	Rv3122	588.957	550.542	592.59	634.78	667.904	623.678	1005.02	1062.25	914.75	604.311	788.767	639.972	494.321	507.871	416.504	534.446	522.758	547.709	483.012	513.952	480.698	744.215	719.608	693.062
Rv0131c	fadE1	1183.38	1228.91	1159.02	498.214	503.319	504.348	1104.09	1096.3	1137.8	463.893	496.497	474.172	990.432	1078.23	1040.42	513.475	531.258	525.586	966.024	983.811	862.387	544.752	477.139	503.216
Rv3439c	Rv3439c	103.853	104.278	103.343	295.261	301.855	292.72	139.653	115.759	107.54	318.329	352.888	334.003	111.043	118.326	116.351	362.864	333.63	317.765	100.627	103.342	121.968	336.07	375.73	350.676
Rv0664	vapB8	42.3612	47.0932	31.3955	52.4768	57.366	50.7645	53.7126	49.0271	43.8124	75.7227	61.3405	57.6696	51.9395	47.8622	42.1563	50.2036	67.2927	51.62	40.251	52.3597	45.9174	67.8845	67.6055	71.2958
Rv2975a	Rv2975a	204.973	195.1	204.071	407.169	334.635	388.975	198.14	194.747	204.458	341.855	401.961	389.27	309.846	281.855	338.936	467.084	432.09	445.809	276.726	249.398	225.282	412.335	410.183	376.376
Rv3510c	Rv3510c	347.088	398.05	376.746	377.454	374.928	400.842	365.246	439.882	415.554	374.202	342.064	362.037	202.385	184.801	177.056	363.5	403.048	403.575	337.102	272.822	276.94	364.565	388.731	387.153
Rv0106	Rv0106	241.869	227.617	190.989	177.662	198.049	172.731	139.653	126.653	126.127	202.172	227.321	229.877	141.49	178.154	166.939	110.575	116.168	97.8769	144.233	133.655	150.667	211.196	251.57	232.955
Rv2044c	Rv2044c	61.492	56.0633	62.7909	48.0511	46.4392	38.8975	75.1977	54.4746	66.3824	43.3751	44.0208	40.8493	57.3125	51.8507	50.5875	44.4842	54.5425	48.2681	31.8654	23.4241	21.5238	51.961	42.2534	42.2801
Rv1870c	Rv1870c	1717.68	1777.21	1711.05	3502.67	3515.72	3716.36	3227.53	2986.57	3025.71	3788.34	3789.4	3807.79	2785.03	2209.64	2008.32	3602.59	3516.93	3848.04	1962.24	2091.63	1602.81	4110.78	3873.66	4063.86
Rv0248c	Rv0248c	2197.31	2364.75	2198.99	5214.17	5386.94	5254.45	2261.9	2270.23	2166.72	4860.95	4884.87	4762.55	3130.7	3212.09	3259.52	5439.79	5481.16	5402.67	2579.42	2367.21	2318.83	5117.32	5007.36	5225.32
Rv3546	fadA5	631.318	563.997	516.717	299.687	332.586	333.595	451.186	516.147	570.889	288.187	313.197	265.12	465.664	533.132	546.345	329.183	361.964	302.346	466.241	562.178	730.374	300.871	313.975	301.764
Rv0522	gabP	1914.45	1966.7	1989.69	828.881	745.075	824.758	2243.99	2365.56	2187.97	807.218	715.88	732.083	2066.83	1805.47	1709.86	775.297	796.887	817.876	1717.38	1825.7	1486.58	775.224	747.561	864.669
Rv1098c	fum	942.877	984.472	979.8	2391.17	2428.49	2296.27	1086.19	1092.22	1083.36	2186.4	2108.67	2174.62	875.807	913.37	932.496	2735.14	2716.5	2663.46	853.657	848.778	893.955	2264.49	2289.49	2284.78
Rv3355c	Rv3355c	75.1569	95.3077	69.3317	101.16	96.293	112.077	90.7147	100.778	96.9184	91.8965	104.64	109.732	51.9395	77.1113	72.5088	140.443	128.21	127.374	92.2419	73.028	53.092	108.112	115.059	99.4825
Rv3225c	Rv3225c	1079.53	1134.72	1042.59	695.476	730.734	746.304	1231.81	1346.88	1229.4	717.527	738.251	653.588	712.825	922.677	1006.69	740.98	769.261	753.518	1190.76	1194.63	1112.06	772.71	735.86	723.735
Rv1683	Rv1683	4585.94	4384.15	4582.43	3409.73	3383.23	3388.69	6087.43	5905.05	5893.43	3221.52	3219.29	3108.55	2772.49	2842.48	2967.8	4032.81	3899.43	3741.45	3475	3392.36	3324.71	3328.02	3357.52	3413.08
Rv3047c	Rv3047c	195.408	164.826	170.059	123.289	94.2442	108.122	169.493	192.023	177.905	128.655	134.949	148.98	127.162	132.951	165.253	101.678	92.0847	103.24	201.255	235.619	172.19	145.826	151.462	137.618
Rv0909	Rv0909	467.339	386.837	367.589	642.367	680.88	702.791	309.146	344.552	319.963	506.533	689.9	637.569	592.827	498.565	514.306	596.089	651.676	722.68	434.375	411.988	312.813	661.245	651.353	625.911
Rv2928	tesA	80.6228	81.8525	62.7909	426.137	393.367	429.191	56.0999	69.4551	79.6589	444.044	406.291	422.109	132.535	168.847	124.783	440.394	457.59	459.888	132.493	112.987	86.0952	474.353	446.586	423.63
Rv2882c	frr	1284.5	1223.3	1092.3	1906.87	1865.08	1901.36	1489.63	1333.27	1342.25	1685.75	1928.26	1758.12	1162.37	1106.15	1087.63	1987.81	1957.15	2137.87	1190.76	1246.99	988.66	1977.87	1790.89	1910.06
Rv2766c	fabG5	240.502	283.681	249.856	284.513	270.44	251.845	241.11	277.82	231.011	274.219	267.733	260.314	313.428	287.173	364.23	308.848	310.255	281.564	293.497	326.559	429.041	270.7	292.524	283.525
Rv1646	PE17	3096.46	3093.58	3006.12	1347.96	1333.08	1278.34	1963.5	2094.55	2093.7	1483.58	1395.68	1265.53	3288.31	3644.17	3461.87	1367.57	1373.48	1281.79	3360.96	3486.05	4917.47	1428.93	1498.37	1449.96
Rv0267	narU	23.2303	20.1828	13.0814	21.4965	15.7074	27.0304	22.6787	21.7898	17.2594	26.4662	18.763	22.4271	7.16407	10.636	26.98	27.326	20.542	18.1005	16.7712	15.1568	22.9587	22.6282	24.702	24.0416
Rv1453	Rv1453	168.078	181.645	184.448	80.2958	91.5125	81.7506	134.878	88.5212	118.161	108.805	108.248	111.334	182.684	191.449	185.488	104.856	81.4595	95.1954	187.838	168.102	154.971	93.865	126.11	125.182
Rv3017c	esxQ	17.7644	38.1231	15.6977	38.5673	49.1709	52.083	34.6148	32.6848	53.106	33.8179	42.5775	46.456	14.3281	22.6016	28.6663	47.6617	51.7091	52.9608	40.251	30.3135	10.0444	41.904	46.8038	40.622
Rv3581c	ispF	1399.28	1403.83	1446.81	1459.23	1421.17	1458.98	2184.31	2120.42	2201.24	1673.25	1404.34	1489.8	574.916	554.404	564.894	1572.84	1529.31	1425.25	816.76	746.815	899.695	1556.31	1702.49	1557.73
Rv1717	Rv1717	19.1308	17.9403	17.0059	85.9861	85.3661	68.565	23.8723	19.0661	39.8295	97.7778	94.5366	99.3198	30.4473	23.9311	11.8038	80.7071	102.71	70.3909	26.834	26.1798	50.2222	99.7315	102.708	105.286
Rv0872c	PE_PGRS15	4915.26	4696.99	5142.32	1316.98	1391.81	1228.9	3566.52	3871.78	4066.59	1428.44	1394.23	1052.47	3820.24	5279.47	5036.83	1493.4	1399.69	1169.83	5254.43	5566.66	9236.58	1376.13	1398.26	1316.49
Rvnt35	gluU	2.73298	1.12127	3.92443	10.116	6.14636	5.93351	4.77446	5.44746	6.63824	8.08689	4.32992	6.40773	0	0	1.68625	5.08391	7.08344	5.36312	1.67712	1.37789	5.73968	5.86656	5.85047	8.29021
Rv3682	ponA2	10459.1	10640.8	10471.7	7262.03	7128.41	7093.18	11678.3	11554.1	11347.4	6809.89	7072.2	6966	10697.7	11026.9	11163	7755.51	7460.98	7750.38	11654.3	11502.6	11707.5	7499.14	7118.08	7388.24
Rv3377c	Rv3377c	885.485	829.737	790.119	771.346	751.905	766.082	846.273	830.738	776.675	762.373	798.87	757.714	1078.19	902.734	854.929	662.18	714.01	786.367	821.791	852.912	677.282	797.014	796.965	853.892
Rv2225	panB	204.973	170.433	181.832	744.159	708.197	641.479	201.721	204.28	157.99	701.354	665.364	643.977	209.549	204.744	205.723	614.518	553.216	509.496	301.882	250.775	352.99	694.769	695.556	732.026
Rv0134	ephF	1941.78	1979.04	1951.75	2338.06	2300.79	2280.45	2560.3	2448.63	2425.61	2206.99	2239.29	2231.49	1597.59	1538.24	1504.14	2335.42	2356.66	2391.28	1677.12	1835.35	1806.56	2279.58	2426.65	2329.55
Rv2955c	Rv2955c	187.209	226.496	223.693	584.832	591.416	563.684	150.395	177.042	189.854	560.936	660.313	573.492	304.473	271.219	264.741	530.633	531.966	519.552	306.914	256.287	345.816	617.665	691.006	581.973
Rv1909c	furA	1082.26	1148.18	1279.37	121.392	134.537	155.59	981.151	889.298	946.614	132.331	135.671	130.557	874.016	791.056	785.793	167.769	164.336	183.016	927.45	965.899	895.39	154.207	132.611	135.13
Rv1852	ureG	230.937	216.405	221.076	328.138	340.099	317.772	169.493	189.299	171.267	288.187	278.558	296.358	322.383	386.886	343.995	337.445	327.963	315.083	214.672	246.642	220.978	296.68	312.025	299.277
Rv3272	Rv3272	994.804	1033.81	1062.21	2076.94	1979.81	2018.05	1688.96	1613.81	1578.57	1576.21	1689.39	1645.99	1167.74	1142.05	1165.2	2097.11	1993.99	2062.12	888.876	917.673	939.873	1698.79	1746.04	1730.17
Rv0730	Rv0730	2385.89	2512.76	2520.79	1924.57	1931.32	1861.8	1858.46	1752.72	1894.56	2087.15	2071.14	2133.77	3071.59	3277.23	2979.6	1917.27	1801.32	1800	2768.93	2637.28	3232.87	2192.42	2192.63	2245.82
Rv2165c	Rv2165c	2657.82	2455.57	2526.03	1418.14	1408.2	1467.56	4319.69	4315.75	4358.67	1900.42	1773.82	1734.89	1515.2	1478.41	1458.61	1695.48	1729.78	1749.72	2403.32	2306.58	2034.72	1879.81	1874.1	1946.54
Rv1829	Rv1829	3017.21	2987.05	2754.95	2108.56	2137.57	2088.6	2349.03	2428.21	2176.02	1963.64	1973	2018.43	3460.24	3105.72	3028.51	2146.05	2195.87	2358.43	2617.99	2666.21	2600.07	2121.18	2000.21	2153.8
Rv2957	Rv2957	440.009	401.414	397.676	1319.51	1320.78	1290.87	546.675	555.641	565.578	1374.04	1289.59	1392.88	725.362	642.151	635.716	1350.41	1326.73	1401.12	685.944	669.653	556.749	1370.26	1495.12	1401.05
Rv0071	Rv0071	337.523	307.227	291.716	141.624	125.659	129.219	301.984	325.486	284.117	147.769	155.877	124.951	413.725	377.58	333.878	130.911	144.502	132.067	315.299	333.449	239.632	164.264	132.611	157.514
Rv0139	Rv0139	393.549	400.292	448.694	1160.81	1079.71	965.844	293.629	358.171	365.103	1089.52	1077.43	1019.63	682.377	759.148	770.616	1124.82	1102.18	1064.58	568.545	548.399	655.758	1090.34	1113.54	1151.51
Rv0225	Rv0225	817.16	863.375	897.387	1422.56	1583.71	1525.57	809.27	789.882	748.794	1379.92	1410.83	1373.66	911.628	909.382	900.458	1524.54	1573.23	1509.05	912.356	866.691	915.479	1511.9	1489.92	1378.66
Rv0075	Rv0075	621.752	641.365	563.81	960.389	980.686	968.481	607.55	574.707	589.476	921.905	831.344	824.194	736.108	745.853	704.853	1012.33	945.639	1059.89	635.63	643.473	573.968	909.317	913.324	889.54
Rv3608c	folP1	1205.24	1281.61	1251.89	679.037	632.392	641.479	1845.33	1865.76	1834.81	639.599	674.746	659.195	630.438	672.73	654.265	725.728	684.26	628.155	1001.24	924.562	1051.8	720.749	684.505	672.336
Rv0060	Rv0060	4293.51	4477.22	4243.62	2379.79	2175.13	2306.82	4144.23	4163.22	4029.41	2214.34	2166.4	2173.82	4348.59	3775.8	3340.46	2538.78	2507.54	2739.88	4747.94	5379.27	3904.42	2313.1	2174.43	2409.14
Rv3779	Rv3779	1106.86	1237.88	1142.01	1247.43	1262.74	1257.25	1482.47	1312.84	1351.55	1221.12	1195.78	1251.91	967.149	1023.72	981.398	1220.77	1165.93	1294.52	1368.53	1248.37	1156.55	1294.83	1257.85	1306.54
Rv0455c	Rv0455c	3528.27	3551.05	3450.89	2408.24	2267.32	2404.39	3296.76	3335.21	3200.96	2209.19	2270.32	2258.72	3456.66	3029.94	3160.03	2086.95	2091.74	2511.95	3703.09	3392.36	2737.83	2462.28	2284.28	2341.16
Rv2142A	parD2	332.057	292.651	272.094	280.719	254.05	255.8	273.338	287.354	329.257	300.685	305.981	317.984	311.637	256.595	279.918	230.047	244.379	268.156	335.425	283.845	235.327	334.394	312.675	325.805
Rv1731	gabD2	1067.23	983.351	1062.21	1024.25	1037.37	1042.32	987.119	1029.57	910.767	1028.51	1052.89	997.203	1122.97	1215.17	1261.32	1069.53	1013.64	1030.39	1046.53	987.945	1212.51	1095.37	1059.59	1081.87
Rv0752c	fadE9	1550.96	1567.53	1691.43	821.294	878.929	804.98	2421.84	2311.08	2368.53	638.129	648.766	598.322	1359.38	1376.04	1406.33	1098.76	1236.77	834.636	1965.59	1624.53	1942.88	650.35	584.397	748.606
Rv0472c	Rv0472c	2503.41	2777.38	2662.07	2391.17	2419.62	2544.16	3340.93	3347.46	3126.61	2444.45	2478.16	2696.85	2761.75	2549.99	2586.71	2214.68	2250.41	2375.86	3332.45	3312.44	2740.7	2764.83	2587.21	2649.55
Rv1217c	Rv1217c	1903.52	1859.06	1909.89	661.967	738.929	715.977	1185.26	1005.06	1157.71	657.979	636.498	608.734	1225.06	1471.76	1429.94	538.259	481.674	473.966	1127.03	1125.73	1515.28	680.521	653.953	664.875
Rv2373c	dnaJ2	3252.24	3218.04	3155.24	1631.21	1626.05	1534.8	4467.7	4607.19	4557.82	1771.03	1662.69	1714.87	1767.73	1999.58	2060.6	1702.48	1680.9	1552.62	2535.81	2349.3	2513.98	1732.31	1850.7	1818.87
Rv2981c	ddlA	1403.38	1430.74	1421.95	1230.99	1224.49	1286.91	1403.69	1444.94	1367.48	1301.99	1285.99	1310.38	1309.23	1524.94	1411.39	1460.99	1347.27	1232.18	2222.19	2262.49	2242.78	1325.84	1378.11	1385.29
Rv2091c	Rv2091c	6810.58	6847.58	6917.47	5683.3	5597.97	5741	5760.38	5620.42	5572.14	4735.98	5078.27	4786.57	8098.98	7973.04	7726.4	5822.99	5731.92	5936.3	4761.36	5036.18	4195.71	5174.31	4963.8	5181.38
Rv1191	Rv1191	274.664	236.587	260.321	360.383	396.782	408.094	255.433	265.564	249.598	385.23	342.064	355.629	259.697	235.322	300.153	404.171	369.047	398.212	244.86	238.374	266.895	370.431	402.383	360.624
Rv0783c	emrB	716.04	694.064	692.009	997.059	962.247	1062.1	743.622	814.395	750.122	792.515	790.21	848.223	621.483	607.584	652.579	1089.23	1186.48	1163.13	573.577	537.376	443.39	825.509	800.215	926.017
Rv1998c	Rv1998c	129.816	160.341	154.361	189.043	185.074	178.005	96.6828	125.292	127.454	207.318	158.042	180.217	132.535	171.506	158.508	172.853	162.919	177.653	112.367	176.37	142.057	190.244	182.015	200.623
Rv2202c	adoK	10606.7	10453.6	10490	6203.64	6224.9	6328.42	13205	13197.8	12807.8	5899.02	6110.96	6032.08	7649.43	7555.58	7377.35	6159.16	6202.26	6017.42	8739.5	8593.88	8422.98	6328.34	6232.7	6362.74
Rv1777	cyp144	92.9212	119.976	111.192	84.0893	68.2929	87.6841	138.459	114.397	103.557	83.0744	71.4437	100.922	154.027	119.655	129.841	66.7263	81.4595	83.1284	107.336	99.2079	129.143	82.1319	86.457	98.6535
Rv2596	vapC40	482.371	481.023	501.019	350.899	346.245	369.856	571.741	498.443	546.991	356.558	327.631	458.153	496.112	446.714	477.209	350.154	323.713	343.24	513.2	551.155	456.305	405.631	389.382	400.417
Rv0217c	lipW	184.476	168.19	171.367	286.41	273.172	272.282	151.589	152.529	104.884	240.401	258.352	237.887	155.818	196.767	177.056	273.896	267.046	266.815	150.941	173.614	142.057	263.995	260.021	247.877
Rv2567	Rv2567	1315.93	1482.31	1325.15	4035.02	4113.28	4150.16	1292.68	1288.32	1250.65	3709.68	3663.83	3779.76	1316.4	1431.88	1512.57	4278.75	4278.4	4387.03	1130.38	1147.78	1193.85	3887.85	3817.76	3979.3
Rv3276c	purK	1110.96	1010.26	1075.29	1284.1	1151.42	1160.99	1034.86	990.076	1141.78	1178.48	1332.89	1224.68	685.96	833.6	848.184	1407.61	1438.65	1287.82	1051.56	1030.66	1216.81	1292.32	1347.56	1272.55
Rv2092c	helY	5493.29	5465.05	5600.17	3558.94	3621.57	3699.21	6625.75	6462.05	6436.44	3387.67	3442.29	3269.54	3968.89	4037.71	3861.51	3751.93	3684.1	3787.03	3619.24	3667.93	4105.31	3569.38	3403.03	3603.75
Rv1957	Rv1957	702.375	818.525	737.794	400.215	387.221	404.138	632.616	565.174	614.701	421.253	502.271	525.434	709.243	701.979	708.225	475.346	473.174	487.374	1006.27	983.811	761.942	492.791	516.792	504.874
Rv2728c	Rv2728c	625.852	649.214	707.706	182.088	182.342	164.16	693.49	650.971	779.33	188.204	184.743	187.426	608.946	640.822	554.776	184.927	184.878	165.586	675.881	610.404	912.609	181.863	222.318	179.898
Rv1638A	Rv1638A	1373.32	1485.68	1429.8	503.272	546.343	501.052	358.084	337.743	354.482	505.798	464.745	533.444	2716.97	2883.7	2890.23	520.466	529.841	503.463	1289.71	1304.86	1364.61	519.61	537.594	512.335
Rv2574	Rv2574	489.203	596.514	532.415	889.577	919.905	926.946	549.063	473.929	519.111	793.25	776.499	888.272	573.125	567.699	581.756	910.656	958.389	966.032	467.918	438.168	434.781	854.842	843.118	872.13
Rv3312b	Rv3312b	13.6649	6.7276	18.314	18.3353	11.6098	15.1634	10.7425	4.0856	13.2765	9.55723	11.5465	16.8203	26.8653	15.9541	42.1563	10.1678	17.0002	12.7374	11.7399	17.9125	7.1746	16.7616	13.6511	9.11923
Rv1385	pyrF	218.638	192.858	231.542	192.204	187.805	187.235	229.174	213.813	240.304	185.263	179.692	147.378	175.52	218.039	251.251	175.395	187.711	170.279	385.739	341.716	650.019	160.073	170.964	205.597
Rv1710	scpB	461.873	505.691	520.642	1373.25	1426.64	1406.24	538.32	483.462	485.92	1370.36	1243.41	1263.92	603.573	577.005	554.776	1363.12	1350.1	1347.48	506.492	588.358	556.749	1397.08	1332.61	1326.43
Rv0482	murB	144.848	140.158	136.047	115.702	136.586	139.108	140.846	113.035	124.799	158.797	143.609	152.184	136.117	166.188	173.684	135.995	134.585	135.419	212.995	166.724	269.765	162.588	165.113	146.737
Rv0250c	Rv0250c	823.993	844.314	809.742	1066.61	986.149	1009.36	1070.67	1003.69	1055.48	991.746	1142.38	1179.02	234.623	257.924	276.545	950.692	1002.31	1084.69	340.456	311.402	289.854	1197.62	1142.79	1121.67
Rv3150	nuoF	998.903	1004.66	1037.36	5177.5	5248.31	5088.32	1081.41	1066.34	1026.27	4994.02	4814.15	4626.38	925.956	1043.66	967.908	5573.87	5514.46	5241.78	1100.19	1084.4	1034.58	5051.11	4927.4	5110.92
Rv2314c	Rv2314c	1795.57	1720.02	1869.34	2288.12	2282.35	2315.39	2012.43	1952.91	1991.47	2127.59	2114.44	2052.88	1531.32	1693.79	1632.29	2468.87	2433.87	2397.31	1519.48	1698.93	1508.1	2247.73	2148.42	2185.3
Rv3214	gpm2	460.507	468.69	469.624	639.838	581.172	683.013	513.254	527.042	431.486	652.097	587.426	582.302	463.873	401.511	413.131	593.547	650.26	634.189	405.864	411.988	388.863	626.884	642.902	633.372
Rv0021c	Rv0021c	280.13	248.921	265.553	355.957	398.83	349.418	266.176	288.715	269.513	402.139	369.486	383.663	256.115	319.081	301.839	318.38	327.963	314.413	343.811	319.67	308.508	384.679	419.284	400.417
Rv3603c	Rv3603c	224.104	207.434	270.786	643.631	614.636	626.974	226.787	243.774	229.683	669.741	661.034	635.166	309.846	297.809	317.015	657.731	680.718	634.189	291.82	276.955	407.517	715.721	670.204	667.362
Rvnt11	gluT	125.717	121.097	150.437	199.791	161.171	185.917	84.7466	84.4356	96.9184	147.769	201.341	209.052	218.504	130.292	136.586	162.685	211.086	234.636	212.995	179.125	124.838	175.997	196.316	209.742
Rv1796	mycP5	7653.7	7898.2	7691.89	5811.65	5667.63	5635.52	9237.38	9695.12	9694.49	6150.45	5737.86	5933.56	6438.71	6365.67	6296.46	5688.9	5757.42	5646.02	6723.59	6660.7	7128.68	6143.97	6183.3	6256.62
Rv0578c	PE_PGRS7	4350.9	4371.82	4384.9	2697.81	2608.11	2643.71	3253.79	3596.69	3681.57	2380.49	2382.18	2470.98	5022.01	5009.58	5058.75	2637.28	2835.5	2839.1	5430.53	5541.86	8038.42	2487.42	2535.86	2519.4
Rv1487	Rv1487	1466.24	1406.07	1419.34	1098.85	1090.64	1037.71	1188.84	1139.88	1145.76	919.7	999.49	965.164	1672.81	1754.95	1701.43	1103.21	1119.89	1042.46	1227.66	1226.32	1202.46	1020.78	990.03	997.312
Rv1239c	corA	420.879	392.443	410.757	307.274	324.391	333.595	269.757	302.334	314.653	272.749	272.063	280.338	535.514	494.576	429.994	334.903	356.297	337.877	410.896	372.029	363.035	292.49	284.723	282.696
Rv0559c	Rv0559c	2041.53	2072.1	2010.62	2810.99	2853.96	3010.27	2458.85	2327.43	2201.24	3038.46	3071.36	3420.93	2442.95	2171.08	2183.69	2587.71	2455.83	2847.82	2405	2233.55	1838.13	3416.85	3161.21	3350.9
Rv0912	Rv0912	61.492	51.5783	81.105	257.958	241.074	302.609	89.5211	99.4161	88.9525	231.579	230.207	223.47	66.2676	73.1228	59.0188	240.215	255.712	264.134	50.3137	49.6039	63.1365	230.472	216.468	268.603
Rv2925c	rnc	4216.98	4248.48	4128.5	3208.67	3232.3	3366.28	4853.24	4860.5	4521.97	2795.12	2856.3	2884.28	3793.37	3513.88	3394.42	3422.11	3305.84	3689.83	3723.22	3859.46	3072.16	2867.91	2830.98	3189.24
Rv0349	Rv0349	629.951	678.366	635.758	391.995	384.489	408.753	677.973	675.485	646.565	335.973	378.146	414.1	1409.53	1233.78	1274.81	632.947	659.468	746.814	652.402	657.252	568.228	385.517	368.58	421.143
Rv3732	Rv3732	679.145	680.609	676.311	799.797	858.441	884.093	611.131	535.213	605.408	601.37	614.127	578.298	714.616	757.818	720.029	938.617	920.847	901.004	483.012	447.813	525.181	628.56	634.451	603.527
Rv1281c	oppD	371.685	408.141	391.135	904.119	906.929	930.902	347.342	321.4	269.513	928.522	837.118	875.456	594.618	592.959	586.815	1107.66	1129.1	981.451	476.303	469.859	469.219	880.822	960.128	904.462
Rv2853	PE_PGRS48	405.847	431.688	477.473	219.391	239.025	221.518	371.214	375.875	363.776	227.903	241.032	224.271	381.487	424.112	421.563	253.56	255.712	225.251	449.469	434.034	664.368	243.881	239.219	238.758
Rv1745c	idi	17.7644	16.819	14.3896	37.935	45.7562	52.083	25.0659	35.4085	17.2594	43.3751	49.7941	42.4512	10.7461	14.6246	25.2938	38.7648	48.1674	44.2457	25.1569	8.26732	24.3936	55.3133	53.9544	31.5028
Rv1472	echA12	757.035	827.495	826.747	1080.52	1049.66	1099.68	1127.97	1017.31	1087.34	892.498	977.118	1034.85	716.407	539.779	650.893	1089.23	1086.6	1208.04	744.643	642.095	518.006	1033.35	986.78	1002.29
Rv1644	tsnR	1367.86	1431.86	1561.92	3326.9	3386.64	3165.2	1484.86	1504.86	1710.01	3257.55	3300.84	2917.92	1601.17	1937.09	1917.27	3788.79	3567.22	3239.32	1636.87	1627.28	2394.88	3241.69	3401.73	3218.26
Rv2307D	Rv2307D	321.125	306.106	282.559	331.932	281.367	283.49	323.469	397.665	330.585	350.677	282.888	313.178	376.114	360.296	320.388	253.56	235.878	266.145	441.084	439.546	401.778	311.766	310.725	363.94
Rv0931c	pknD	18570.6	18717.3	18819	16823.6	16917.5	16787.2	26505.4	25592.2	25059.4	16161.3	16463.8	15694.9	11184.9	10701.2	10832.5	18685.3	18030.9	18342.5	12652.2	12385.8	11812.3	16788.4	16376.8	17120.9
Rv2474c	Rv2474c	627.218	611.09	616.136	762.494	820.197	836.625	901.179	871.594	816.504	676.358	613.405	649.584	463.873	433.419	401.328	885.872	905.263	881.563	397.479	461.592	393.168	664.598	679.305	672.336
Rv2070c	cobK	163.979	133.431	159.594	157.43	143.415	141.086	136.072	134.825	119.488	169.825	147.939	163.397	193.43	212.721	198.978	142.985	181.336	128.715	209.641	202.549	219.543	179.349	178.114	141.763
Rv3849	espR	780.265	687.337	729.945	541.839	542.245	520.83	642.164	608.754	594.787	530.059	558.56	495.798	782.674	979.845	964.535	530.633	519.924	504.804	846.948	789.529	717.46	554.809	538.244	557.102
Rv0013	trpG	426.345	447.385	440.845	831.41	808.588	817.506	446.412	427.626	446.09	860.886	767.839	781.743	517.604	538.45	489.013	789.277	797.595	813.183	479.658	442.302	360.165	834.728	844.418	827.363
Rv2141c	Rv2141c	523.365	515.783	463.083	642.999	641.953	640.819	495.35	525.68	556.285	520.501	582.374	564.681	420.889	457.35	482.268	725.093	683.552	690.502	538.357	501.551	421.866	596.713	589.598	546.325
Rv3816c	Rv3816c	1601.53	1674.05	1531.84	1150.06	1204	1191.32	1622.12	1671.01	1659.56	1147.6	1259.28	1115.75	1481.17	1381.36	1394.53	1229.67	1243.14	1259.66	1638.55	1748.54	1549.71	1253.77	1202.6	1209.54
Rv2764c	thyA	1120.52	1113.42	1115.85	1688.74	1652	1738.52	1125.58	1124.9	1193.56	1567.39	1521.97	1577.1	1545.65	1290.95	1333.82	1681.5	1805.57	1815.42	1091.81	1070.62	886.78	1640.12	1593.93	1617.42
Rv3700c	egtE	347.088	344.229	329.652	433.724	387.904	415.346	300.791	322.762	365.103	464.628	425.054	433.323	395.815	485.269	446.856	477.252	409.423	372.737	400.833	440.924	632.8	470.163	471.288	433.578
Rv3382c	Rv3382c	218.638	209.677	198.838	333.828	366.05	295.357	269.757	249.221	323.946	313.183	308.868	333.202	200.594	235.322	198.978	321.557	326.546	364.022	231.443	195.66	162.146	316.794	325.026	350.676
Rv2771c	Rv2771c	561.627	596.514	540.264	520.975	489.66	483.252	627.841	623.734	610.719	476.391	528.972	501.405	596.409	570.358	628.971	521.101	563.133	539.664	531.649	497.417	463.479	538.886	506.391	522.283
Rv2077A	Rv2077A	12.2984	21.3041	30.0873	28.4513	22.5367	24.3933	17.9042	12.2568	21.2424	30.8772	30.3094	29.6358	19.7012	26.5901	32.0388	18.4292	22.667	26.1452	15.0941	37.2029	15.7841	30.1709	31.8526	32.3318
Rv1023	eno	949.71	872.346	838.521	1397.27	1485.37	1501.84	1058.74	969.648	1019.63	1515.19	1630.21	1579.51	968.94	963.891	957.79	1477.51	1547.02	1505.7	1071.68	1095.42	921.219	1643.48	1586.78	1679.6
Rv2940c	mas	8334.22	8233.46	8597.13	20920.5	20899	20715.2	12172.5	12507.4	12267.5	30567	30594.5	29503.6	11396.2	11586.6	11453	23201.1	22543	22134.9	14988.5	15068.6	15713.8	31142.2	31348.8	31632.1
Rv2999	lppY	69.6909	45.9719	57.5584	96.1021	112.683	106.803	47.7446	57.1983	49.123	112.481	121.238	108.931	51.9395	63.8163	43.8425	116.93	106.252	113.296	87.2105	56.4934	71.746	125.712	111.159	120.208
Rv1340	rphA	2839.56	2811.02	2760.19	1867.04	1926.54	1907.95	3850.6	3577.62	3430.64	1792.35	1787.53	1800.57	2897.87	2924.91	3074.03	1926.8	1957.15	1960.89	2772.29	2894.94	2571.38	1886.52	1817.55	1883.54
Rv3078	hab	105.22	117.733	119.041	209.275	223.318	214.925	72.8105	92.6068	74.3483	222.022	206.393	213.057	184.475	196.767	215.84	245.299	225.962	231.285	139.201	140.544	133.448	202.815	221.668	241.245
Rv2548A	Rv2548A	543.863	589.786	559.886	692.947	633.758	651.368	545.482	567.898	519.111	627.837	728.87	664.802	730.735	719.262	618.854	618.331	663.718	727.373	761.415	739.925	783.466	703.987	666.304	730.368
Rv2265	Rv2265	34.1622	49.3357	40.5525	84.7216	92.8783	83.0692	21.4851	34.0466	38.5018	83.0744	90.2066	81.6986	62.6856	51.8507	47.215	90.8749	94.2097	83.7987	48.6366	68.8943	78.9206	90.5127	91.0074	82.9021
Rv2055c	rpsR2	16.3979	22.4253	15.6977	56.9026	56.0002	61.313	10.7425	13.6187	15.9318	48.5213	68.557	54.4657	30.4473	22.6016	26.98	39.4003	36.1255	40.2234	21.8026	16.5346	15.7841	65.3703	59.8048	53.0573
Rv0271c	fadE6	4297.61	4212.6	4310.34	2523.31	2462.64	2535.59	5857.07	5819.25	5722.17	2188.61	2095.68	2118.56	2451.9	2624.44	2526	2592.8	2612.37	2440.22	2651.53	2787.47	2921.5	2207.5	2230.98	2201.05
Rv2583c	relA	10880	10913.3	10895.5	5718.08	5617.77	5772.65	10281.8	10386.9	10049	5193.99	5595.7	5254.34	11156.2	11360.6	11323.2	6058.12	6037.21	6019.43	9625.02	9911.14	9837.81	5512.05	5423.39	5714.44
Rv0283	eccB3	43677.1	44626.4	45193.8	5228.71	5369.19	5254.45	43238.7	41368	41846.2	6816.51	5935.6	6269.96	48817.8	51849.4	52187.8	4919.32	4555.36	4457.42	58362.3	58736.6	68480.1	6651	6584.38	6492.06
Rv3306c	amiB1	1441.65	1518.2	1496.52	1985.9	2035.81	1977.18	1585.12	1491.24	1647.61	1995.99	1981.66	1892.68	1375.5	1490.38	1605.31	2236.92	2161.87	1978.99	1672.09	1617.64	1931.4	2030.67	2061.97	1994.62
Rv2524c	fas	164539	165935	171872	69769.5	70633.3	69407.6	140630	132825	138455	71125.6	68014.4	66947.2	122706	138108	138930	49842	48088.7	44997.9	216119	217140	297810	70126.4	74091.7	69496.8
Rv0386	Rv0386	2935.22	2954.54	2876.61	900.957	844.1	837.944	3281.25	3235.79	3214.24	1119.67	1143.1	1054.87	2394.59	2472.88	2490.59	935.44	965.473	938.546	3273.75	3373.07	3689.18	1138.11	1149.29	1154.83
Rv2079	Rv2079	289.696	315.076	302.181	374.292	362.635	369.196	385.537	345.914	387.673	395.522	402.682	410.896	322.383	244.629	256.31	318.38	340.005	327.821	315.299	315.536	275.505	408.145	404.983	441.868
Rv3257c	pmmA	5494.65	5626.52	5635.49	6084.15	6030.26	6264.47	6521.91	6052.13	6023.54	5379.25	5818.69	5539.48	3771.88	3843.6	3697.95	6449.58	6178.88	6453.17	3743.34	3685.85	3616	5848.12	5769.87	5739.31
Rv1538c	ansA	274.664	225.375	240.699	499.478	566.831	516.875	186.204	181.128	209.769	528.588	500.106	442.133	191.639	222.027	259.683	594.818	605.634	547.709	212.995	210.817	381.689	501.172	512.241	512.335
Rv2444c	rne	22299.7	22231.4	23045.6	15817	15863.1	15723.8	29040.6	27580.5	27851.4	16148	16890.3	16278	19482.7	19771.1	19228.3	17099.7	16477.5	16905.2	26381.2	25705.9	28897.9	17050.7	16833.1	17252.8
Rv0138	Rv0138	92.9212	99.7927	100.727	252.268	236.293	278.216	102.651	88.5212	82.3142	238.196	279.28	252.304	152.236	143.587	153.449	248.476	245.087	276.871	119.076	154.323	132.013	250.586	289.923	255.338
RVnc0012	mcr10	49.1936	24.6679	52.3258	80.9281	92.1954	93.6176	57.2935	55.8365	45.1401	99.9833	92.3716	84.9024	59.1036	23.9311	33.725	115.024	99.8765	109.274	45.2824	44.0924	47.3524	93.0269	97.5079	96.9955
Rv3420c	rimI	340.256	345.35	383.286	240.888	256.781	263.052	629.035	622.372	598.77	323.476	282.166	270.727	157.609	166.188	198.978	293.596	293.963	305.698	285.111	245.264	324.292	295.842	296.424	317.515
Rv1876	bfrA	276.031	320.682	319.187	1176.62	1195.81	1242.74	451.186	370.427	387.673	962.34	1127.22	1181.43	254.324	232.663	207.409	1017.42	1058.97	1188.6	266.663	279.711	281.244	1161.58	1125.89	1100.94
Rv3781	rfbE	260.999	262.376	274.71	411.595	488.294	505.008	305.565	340.466	342.533	544.027	469.075	470.968	232.832	245.959	269.8	509.027	495.841	523.575	295.174	296.246	281.244	517.934	477.789	544.667
Rv2333c	stp	632.684	580.816	600.438	232.668	244.489	251.845	371.214	366.342	381.035	208.054	221.548	249.101	571.334	586.312	583.443	238.308	240.837	248.044	548.42	479.505	510.831	215.387	240.519	244.561
Rv3635	Rv3635	262.366	256.77	225.001	483.672	534.05	491.822	213.657	215.175	281.462	551.379	513.817	488.589	229.25	273.878	264.741	488.056	511.424	457.876	211.318	157.079	215.238	556.485	547.344	505.703
Rv1412	ribC	239.136	318.44	316.571	292.1	288.196	266.349	317.501	348.637	333.24	293.333	305.981	281.139	324.174	328.388	315.329	237.673	271.296	283.575	315.299	296.246	274.07	299.195	319.826	291.815
Rv2004c	Rv2004c	35685.9	36203.5	35053	617.709	568.197	564.343	30862.1	30918.4	29881.4	458.747	452.477	448.541	30587	30130.6	30762.3	720.009	670.802	654.971	32925.3	33241.5	33262.9	503.686	442.686	467.568
Rv2051c	ppm1	4475.25	4421.16	4369.2	3264.94	3349.77	3258.16	6244.99	5860.11	5987.7	3339.15	3163.01	3261.53	3565.91	3621.57	3745.16	3642.62	3596.97	3670.39	3755.08	3683.09	3760.92	3272.7	3409.53	3420.54
Rv1047	Rv1047	0	0	2.61629	0	0	1.31856	0	0	0	0	0.721653	2.4029	1.79102	0	0	1.90647	0	0	0	1.37789	0	0	3.25026	0
Rvnt32	glyT	21.8638	25.7891	13.0814	20.232	13.6586	15.8227	16.7106	19.0661	18.5871	11.0276	14.4331	23.228	26.8653	13.2951	16.8625	13.3453	12.0418	14.7486	26.834	23.4241	25.8286	12.5712	18.8515	18.2385
Rv0567	Rv0567	665.48	603.242	592.59	776.404	717.758	780.586	720.943	649.61	601.425	730.761	760.622	757.714	642.975	580.994	558.149	702.851	779.178	845.362	761.415	727.524	609.841	765.167	741.71	820.731
Rv0019c	fhaB	1228.47	1297.31	1219.19	1426.36	1396.59	1390.42	1690.16	1669.65	1636.99	1553.42	1428.87	1384.87	1054.91	1108.81	920.693	1403.8	1294.14	1431.95	1469.16	1366.86	1522.45	1547.93	1479.52	1490.58
Rv3622c	PE32	9.56542	11.2127	10.4652	13.9095	16.3903	11.867	25.0659	16.3424	21.2424	13.2331	15.1547	12.8155	16.1192	14.6246	13.49	15.2517	10.6252	12.067	13.417	19.2904	24.3936	13.4093	13.6511	15.7514
Rv0762c	Rv0762c	390.816	389.08	395.06	158.063	157.074	157.568	510.867	531.127	466.005	140.418	163.815	165.8	354.621	300.468	306.898	144.891	158.669	163.575	335.425	392.698	331.466	160.073	147.562	179.898
Rv2403c	lppR	332.057	262.376	283.867	479.878	449.367	440.398	315.114	254.669	276.151	403.609	362.992	421.308	358.203	362.955	397.955	601.173	617.676	569.161	310.268	326.559	249.676	402.279	414.734	408.707
Rv2519	PE26	828.092	787.129	791.428	1402.33	1407.52	1438.55	756.751	883.85	831.108	1232.88	1252.79	1190.24	1115.8	927.995	981.398	1544.24	1561.9	1599.55	758.06	779.884	773.422	1231.14	1257.85	1308.2
Rv1766	Rv1766	144.848	160.341	158.286	281.984	281.367	321.069	91.9083	108.949	126.127	266.132	287.94	273.93	191.639	211.391	178.743	297.409	315.213	328.491	164.358	148.812	144.927	285.785	277.572	292.644
Rv2097c	pafA	3932.76	3764.09	3756.99	5091.52	5076.89	5251.16	4504.7	4225.87	4150.23	4493.37	4573.12	4800.99	3368.9	3027.28	3009.96	5854.12	5571.83	6104.57	3003.73	3052.02	2463.76	4832.37	4655.68	4823.24
Rv2122c	hisE	418.146	398.05	376.746	17.703	9.561	17.1413	664.843	670.038	616.029	18.3793	10.8248	12.0145	539.096	404.17	431.68	18.4292	10.6252	20.1117	528.294	569.067	539.53	11.7331	14.3012	16.5804
Rv2865	relF	664.114	616.697	617.444	335.725	321.659	327.662	613.518	569.26	604.08	345.531	356.497	358.032	650.139	547.756	559.835	285.335	281.212	272.849	613.828	577.335	551.009	372.946	363.379	357.308
Rv0313	Rv0313	5002.72	5220.62	5161.94	2228.68	2209.27	2232.32	6138.76	6128.39	5925.3	2577.51	2367.74	2472.58	6673.33	6343.07	6181.79	2512.72	2421.83	2503.24	5574.76	5955.23	5728.2	2542.74	2585.91	2520.22
Rv3663c	dppD	453.674	455.234	402.909	429.298	473.27	490.504	383.15	407.198	385.018	411.696	397.631	439.73	515.813	573.017	515.993	477.252	476.715	482.01	434.375	403.721	418.997	432.449	413.433	442.697
Rv3221A	rshA	1149.22	1074.17	1080.53	550.058	572.977	559.728	1187.65	1271.98	1310.39	559.466	534.023	523.832	754.018	824.293	760.499	567.492	584.384	583.239	942.544	927.318	760.508	568.218	544.744	555.444
Rv1044	Rv1044	386.716	385.716	376.746	164.385	178.244	178.005	386.731	419.454	447.418	188.204	165.98	173.009	209.549	285.844	251.251	149.34	157.961	140.782	347.165	305.891	324.292	178.511	180.715	184.043
Rv0342	iniA	2672.85	2617.04	2546.96	1261.97	1253.86	1228.9	4108.42	4234.04	3969.67	1540.92	1503.93	1553.87	1669.23	1656.56	1581.7	1056.18	1034.89	1082.01	4214.61	4052.37	3967.55	1521.95	1650.48	1554.41
Rv3139	fadE24	23394.3	23393	23871	10732.5	10599.7	11438.5	22389.8	20385.8	20556	10804.8	10192.6	11116.6	35822.1	38499.8	38957.4	11367.6	10548.7	11049.4	28360.2	32029	32348.8	10920.2	10525	11622
Rv0800	pepC	378.517	365.533	376.746	545	552.489	524.786	303.178	313.229	298.721	452.866	481.343	446.138	295.518	364.284	377.72	611.976	578.717	536.982	288.465	259.043	307.073	491.953	477.789	451.816
Rvnt07	metT	25.9633	42.6081	37.9362	113.173	97.6588	94.9362	40.5829	25.8754	30.5359	85.2799	105.361	88.1063	44.7754	58.4982	26.98	78.1652	85.0012	99.8881	41.9281	50.9818	34.4381	108.95	100.758	77.099
Rv0298	Rv0298	1760.04	1724.51	1673.12	2274.21	2408.01	2315.39	2366.94	2602.52	2399.06	2554.72	2792.8	2868.26	2082.95	1817.43	1838.01	1945.23	2229.16	2267.93	2101.44	1913.88	1779.3	2845.28	2768.57	2841.06
Rv3097c	lipY	28.6963	44.8507	34.0118	103.689	103.122	100.87	45.3573	47.6653	34.5189	85.2799	81.5468	96.9169	51.9395	38.5557	37.0975	92.1459	99.1681	101.229	41.9281	41.3366	24.3936	87.9984	87.1071	96.1664
Rv1331	Rv1331	4025.68	4148.69	3929.67	2754.08	2845.08	2794.68	3603.52	3874.51	3635.1	2517.23	2276.82	2544.67	3965.31	3335.73	3456.81	2531.15	2829.83	2921.56	2547.55	2492.6	2073.46	2572.91	2375.94	2600.64
Rv2922c	smc	1816.06	1880.36	1888.96	2191.38	2193.57	2132.77	1562.44	1597.47	1621.06	1938.65	2029.29	1991.2	1896.69	1990.27	2004.95	2227.39	2226.32	2107.71	1883.41	1811.92	2059.11	1998.82	2101.62	2021.98
Rv0823c	Rv0823c	22331.2	22739.3	22876.8	7080.58	7153.68	7535.56	31145	30290.6	30648.8	7650.2	6940.86	7548.31	19858.8	20998.2	20262	7290.33	6838.35	7196.64	19000.1	19572.9	20727.4	7540.21	7603.02	7615.39
Rv2956	Rv2956	858.155	923.924	875.149	2214.14	2115.03	2256.05	915.502	866.146	808.538	2195.22	2362.69	2279.55	1572.51	1308.23	1239.39	2017.68	2108.74	2358.43	1469.16	1406.82	1124.98	2343.27	2295.34	2390.9
Rv1050	Rv1050	203.607	211.919	205.379	44.2576	30.0489	52.083	253.046	238.326	241.632	49.2565	57.0106	48.058	166.565	180.813	252.938	47.6617	51.7091	48.2681	209.641	216.328	245.371	45.2563	55.9045	57.2025
Rv2859c	Rv2859c	214.539	250.043	205.379	515.284	511.514	527.423	253.046	239.688	284.117	596.224	494.332	517.424	324.174	320.411	298.466	624.05	653.801	565.139	298.528	323.803	341.511	549.781	586.998	512.335
Rv0926c	Rv0926c	543.863	548.299	532.415	658.173	693.856	735.096	490.575	471.205	444.762	625.631	604.024	690.433	662.676	682.036	691.363	702.215	689.927	722.68	545.066	538.754	530.92	646.998	676.055	643.32
Rv3566A	Rv3566A	438.643	404.777	344.042	115.07	112.683	138.449	651.713	751.75	633.289	113.952	134.949	132.159	200.594	182.142	160.194	117.565	102.001	134.748	291.82	239.752	187.975	113.141	146.262	130.156
Rv0291	mycP3	29871.4	30394.2	31339.2	3780.23	4032.69	3976.11	29534.8	27643.1	29056.9	5921.81	5764.57	5529.87	34031.1	38026.5	39252.5	4249.52	4071.56	3715.97	41703.4	41435.8	49282.3	5744.2	5929.78	5997.97
Rv1322	Rv1322	341.622	257.891	277.327	261.752	252.684	235.363	230.368	287.354	292.083	271.278	234.537	266.722	379.696	422.783	426.621	243.392	259.962	281.564	301.882	305.891	348.686	238.015	288.623	263.629
Rv1069c	Rv1069c	1479.91	1605.65	1650.88	1490.85	1543.42	1550.62	1962.3	1980.15	1939.7	1480.64	1498.15	1429.72	723.571	791.056	787.479	1450.19	1395.44	1417.2	994.535	1114.71	1149.37	1560.51	1546.48	1415.97
Rv2221c	glnE	4689.79	4644.29	4604.67	2668.1	2563.71	2614.04	3330.18	3978.01	3803.71	2486.35	2592.18	2491.81	3752.18	3948.63	4072.29	2927.7	2898.54	2774.07	3956.34	4205.31	4893.08	2502.51	2692.52	2571.62
Rv0056	rplI	3792.01	3829.13	3779.23	1884.11	1831.62	1929.05	2615.21	2636.57	2578.29	2016.58	2125.27	2199.45	2878.16	2647.05	2709.8	1676.42	1798.48	1705.47	4204.55	3614.2	3489.73	2272.87	2152.32	2081.67
Rv1906c	Rv1906c	3152.49	3000.51	2900.16	3058.2	3127.81	3092.02	3416.12	3694.74	3601.91	3077.43	3214.24	3226.29	2607.72	2189.7	2291.61	2960.11	3148.59	3490.72	2371.45	2407.17	1816.61	3295.33	3124.15	3348.42
Rv0474	Rv0474	899.15	890.286	876.457	675.876	665.173	713.999	1218.68	1217.51	1174.97	828.538	848.664	882.665	1371.92	1284.3	1183.75	683.151	673.635	779.664	1586.56	1642.44	1638.68	898.422	837.918	892.027
Rv2417c	Rv2417c	967.474	1068.57	1087.07	644.264	615.319	631.589	1465.76	1459.92	1533.43	700.619	713.715	591.914	811.331	848.224	760.499	801.987	743.761	673.072	794.957	903.894	1462.18	667.95	733.259	656.585
Rv0224c	Rv0224c	90.1883	112.127	116.425	250.371	249.952	241.296	69.2296	77.6263	67.7101	246.282	222.269	226.673	188.057	240.64	175.37	263.728	267.046	253.407	176.098	169.48	127.708	244.719	232.719	236.271
Rv0580c	Rv0580c	6071.31	6100.81	6332.73	3355.99	3584.69	3486.93	3701.4	3611.67	3570.05	3198.73	2802.18	3225.49	9915.07	9749.26	9741.47	3256.25	3304.42	3135.41	6245.61	6393.39	5979.31	3203.98	3067.6	3190.07
Rv1687c	Rv1687c	23882.1	24912.3	26268.9	195.998	230.83	233.385	17704.9	16168.1	16237.1	258.78	235.259	251.503	65137.5	65572.5	62001.7	217.337	222.42	192.402	43613.6	54237.8	46214.5	242.205	268.472	252.022
Rv3319	sdhB	644.983	678.366	722.096	711.914	709.563	710.044	762.72	761.283	716.93	812.365	785.88	811.379	847.151	850.883	816.145	747.335	719.677	728.044	835.208	858.423	833.688	836.404	808.665	827.363
Rv0256c	PPE2	326.591	327.41	319.187	357.854	344.196	393.59	227.98	236.965	217.734	417.577	432.992	421.308	334.92	345.671	386.151	352.061	361.964	339.217	429.344	389.942	506.527	448.373	449.836	404.562
Rv2860c	glnA4	390.816	362.169	349.275	923.086	969.076	900.575	433.282	450.777	458.039	977.778	933.098	952.349	490.739	469.315	477.209	1101.3	1056.14	1014.97	422.635	454.703	466.349	981.392	998.481	953.374
Rv0198c	zmp1	2200.05	2213.38	2341.58	4736.19	4516.21	4724.39	1887.1	1838.52	1842.78	4167.69	4346.52	4425.34	2682.94	2604.5	2595.14	4766.17	4828.07	4963.57	1846.51	1674.13	1433.48	4552.45	4345.6	4363.97
Rv3450c	eccB4	345.722	343.108	321.804	268.707	244.489	243.274	278.112	322.762	341.206	268.338	241.754	213.057	268.653	272.549	308.584	263.092	278.379	250.726	305.237	254.909	377.384	248.072	234.669	260.313
Rv0442c	PPE10	433.177	452.992	450.002	488.73	444.587	489.185	463.122	465.758	517.783	491.095	517.425	507.813	481.784	497.235	435.053	407.984	395.256	417.653	508.169	589.736	546.704	486.925	543.444	519.796
Rv2735c	Rv2735c	491.936	581.937	654.072	252.9	247.903	274.919	564.58	539.299	541.681	294.069	319.692	309.974	487.157	401.511	354.113	265.634	283.337	333.854	665.819	706.856	572.533	320.985	286.673	339.899
Rv3878	espJ	3123.79	3153	3117.31	3029.75	2987.81	3217.94	4732.68	4552.71	4502.06	3894.94	3873.11	3817.41	2301.46	2241.55	2237.65	2700.83	2727.83	2920.22	3030.56	3196.7	3120.95	4063.85	3912.02	3885.62
Rv1420	uvrC	1725.88	1669.57	1699.28	1507.92	1500.39	1536.78	2217.74	2188.52	2194.6	1389.47	1458.46	1458.56	1273.41	1318.87	1345.63	1600.16	1712.78	1724.24	1499.35	1523.94	1559.76	1504.35	1428.82	1478.14
Rv2518c	ldtB	880.019	920.56	893.463	716.34	669.953	702.791	713.781	755.835	736.845	669.006	786.602	724.073	1212.52	1251.06	1273.12	739.074	692.76	821.228	826.823	894.249	860.952	737.511	763.162	727.881
Rv0998	Rv0998	802.129	819.646	771.805	950.905	934.247	974.414	907.147	837.547	989.098	686.65	700.004	704.049	456.709	518.507	473.836	915.74	954.847	987.484	439.407	509.818	469.219	708.178	703.357	726.222
Rv0903c	prrA	3585.67	3420.99	3632.72	2957.67	2987.81	2991.15	3379.12	3806.41	3816.99	3508.97	3181.77	3266.34	2210.11	2427.68	2362.44	2977.27	2929.71	2762.68	2366.42	2411.3	2842.58	3385.01	3366.62	3425.52
Rv1014c	pth	103.853	97.5502	99.419	171.972	201.464	197.124	82.3594	95.3306	79.6589	196.291	189.795	187.426	191.639	162.2	185.488	179.843	190.544	189.72	166.035	172.236	163.581	189.406	198.916	197.307
Rv3453	Rv3453	94.2877	104.278	79.7968	178.927	170.049	187.895	103.844	95.3306	95.5907	209.524	217.218	221.067	116.416	124.974	121.41	171.582	173.544	172.29	114.044	104.719	66.0063	226.282	219.718	215.545
Rv2788	sirR	926.479	942.985	954.946	707.489	715.709	714.658	947.73	863.422	913.422	668.271	689.9	656.792	791.63	916.029	878.536	688.87	743.053	675.083	950.93	974.166	1089.1	709.854	672.804	677.31
Rvnt24	metV	153.047	161.462	147.82	392.628	390.635	387.656	126.523	174.319	169.939	374.938	347.837	386.867	248.951	196.767	200.664	327.277	403.048	363.351	186.161	212.195	165.016	381.326	376.38	374.718
Rv2203	Rv2203	168.078	191.737	197.53	345.841	353.757	344.144	183.817	162.062	163.301	321.27	346.394	319.586	272.235	214.05	212.468	359.051	332.922	342.569	218.026	275.577	281.244	297.518	341.278	368.914
Rv2047c	Rv2047c	651.815	682.852	681.543	2059.87	2092.49	2045.74	648.133	638.715	643.91	1944.53	1737.74	1873.46	797.003	893.428	799.283	2247.09	2171.78	2098.32	701.038	680.676	726.069	1904.96	1894.9	1870.27
Rv0647c	Rv0647c	755.668	818.525	818.899	1817.72	1715.52	1752.36	853.434	830.738	781.985	1876.89	1825.06	1827	1020.88	1107.48	1133.16	1785.09	1814.78	1767.15	1180.7	1180.85	1294.3	1899.09	1960.56	1779.08
Rv2074	Rv2074	890.951	881.316	944.48	4282.87	4336.6	4288.61	815.239	838.909	774.019	4545.57	4357.34	4195.46	1083.57	1200.54	1070.77	4184.06	4250.06	4310.61	1021.37	1038.93	1170.89	4358.02	4508.76	4499.93
Rv3544c	fadE28	561.627	552.785	531.107	328.77	358.538	364.581	796.141	759.921	768.709	324.211	370.208	395.677	535.514	482.61	519.365	404.807	374.714	425.027	472.949	509.818	572.533	362.889	368.58	379.692
Rv3547	ddn	523.365	500.085	516.717	683.463	662.441	680.376	247.078	287.354	241.632	567.552	542.683	555.871	727.153	733.887	652.579	674.889	677.177	681.116	402.51	389.942	360.165	570.733	562.296	567.05
Rv2477c	Rv2477c	4525.81	4452.55	4335.19	5431.67	5289.97	5281.48	4952.31	5195.52	4901.68	4767.59	5176.42	4980.41	3170.1	3031.27	2967.8	5437.24	5430.87	5739.21	3677.93	3364.8	3125.26	5056.98	4997.6	5171.43
Rv3917c	parB	2083.9	2142.74	2082.57	4528.18	4514.16	4685.5	3190.53	3068.28	3189.01	4057.41	4163.94	4229.9	2262.05	2161.78	2015.07	4520.87	4352.06	4886.47	2480.47	2787.47	2389.14	4270.86	4056.33	4374.74
Rv2205c	Rv2205c	296.528	303.863	325.728	380.615	333.269	386.338	309.146	324.124	292.083	352.147	360.105	350.823	290.145	362.955	318.701	348.883	340.005	364.022	424.313	405.099	322.857	360.374	351.028	373.889
Rv0155	pntAa	143.481	148.007	166.134	620.87	582.538	602.581	118.168	122.568	155.335	625.631	613.405	677.617	150.445	175.495	165.253	532.54	546.133	496.089	181.129	143.3	229.587	627.722	661.754	662.388
Rv1397c	vapC10	4658.36	4905.54	5118.77	4740.62	4502.55	4561.55	7497.09	6918.27	7295.43	4863.9	4585.38	4905.12	4515.15	4513.67	4380.88	4348.65	4091.39	4334.74	4796.58	5183.61	4969.13	4870.92	4792.19	4968.32
Rv1959c	parE1	109.319	124.461	112.5	153.005	127.708	152.293	134.878	159.338	136.748	186.734	146.496	151.383	136.117	126.303	107.92	125.827	133.877	135.419	159.327	179.125	114.794	160.073	172.264	160.83
Rv2311	Rv2311	16.3979	11.2127	11.7733	30.348	31.4147	40.216	14.3234	10.8949	15.9318	30.8772	37.526	40.8493	8.95508	6.64753	18.5488	42.5778	42.5006	30.8379	15.0941	5.51155	15.7841	39.3898	38.3531	33.1608
Rv0948c	Rv0948c	479.638	460.841	450.002	992.001	898.734	1023.86	317.501	292.801	292.083	779.282	773.612	812.18	852.524	713.944	762.185	995.811	1027.1	1148.38	541.711	552.533	403.212	788.633	786.564	832.337
Rv1071c	echA9	742.003	716.49	657.997	860.493	882.344	833.988	680.36	774.901	711.62	915.289	859.489	836.209	352.83	350.989	273.173	668.534	723.219	715.977	493.075	547.021	563.924	921.888	925.025	808.296
Rv1309	atpG	7838.18	7826.44	7992.76	6570.35	6475.53	6643.55	8139.26	7592.4	7428.2	4336.78	4543.53	4542.28	9691.19	9249.37	9491.9	7168.32	7298.07	7576.08	8662.35	9065.12	7298	4709.17	4396.96	4553.81
Rv0843	Rv0843	91.5548	112.127	86.3375	113.173	121.561	103.507	139.653	126.653	116.833	88.9558	111.856	100.922	73.4317	78.4408	80.94	127.098	112.627	117.318	97.2732	107.475	90.4	96.3792	107.909	101.97
Rv1887	Rv1887	2040.17	2147.23	1998.85	4589.51	4613.87	4628.14	2043.47	2252.52	2000.77	4124.31	3873.11	3868.67	2623.84	2627.1	2440	4331.49	4368.36	4468.82	3030.56	3012.06	3079.34	4140.95	4011.47	3922.1
Rv2210c	ilvE	1960.91	2028.37	2014.54	1864.51	1894.44	1797.85	2331.13	2435.01	2331.35	1834.99	1889.29	1777.34	1482.96	1441.18	1468.72	1802.25	1884.19	1812.73	1875.03	1843.61	1944.32	1848.8	1852.65	1899.29
Rv3210c	Rv3210c	483.737	442.9	457.851	551.955	538.831	535.335	429.701	463.034	439.452	548.438	588.869	563.079	415.516	410.817	369.289	425.142	460.423	478.658	592.025	505.684	512.266	574.085	584.397	570.367
Rv3828c	Rv3828c	606.721	630.152	661.921	202.32	196.683	216.903	534.739	537.937	504.507	196.291	214.331	172.208	700.288	573.017	647.52	203.992	210.378	228.603	920.742	1041.68	586.882	189.406	183.315	221.349
Rv0770	Rv0770	221.371	202.949	194.914	101.792	106.537	79.1135	260.208	238.326	252.253	106.6	108.97	108.931	202.385	226.016	210.781	106.127	116.877	108.603	253.246	275.577	229.587	110.627	109.859	109.431
Rv0494	Rv0494	19.1308	24.6679	30.0873	22.761	17.0732	11.2077	11.9361	16.3424	9.29354	19.8496	28.8661	23.228	19.7012	10.636	35.4113	10.1678	15.5836	19.4413	30.1882	30.3135	41.6127	14.2474	27.9523	30.6738
Rv1339	Rv1339	3749.65	3653.09	3579.08	1856.29	1804.3	1923.78	5101.51	5232.29	5033.12	1657.81	1764.44	1907.1	3779.05	3573.71	3498.97	1989.08	1969.9	2078.21	3169.77	3133.31	2747.87	1857.19	1733.04	1827.16
Rv0699	Rv0699	1.36649	5.60633	1.30814	22.1288	21.8537	25.0526	8.3553	9.53306	5.3106	33.8179	24.5362	30.4367	3.58203	3.98852	5.05875	24.1486	21.9587	24.8044	1.67712	4.13366	5.73968	28.4947	27.9523	33.9899
Rv3022A	PE29	0	0	1.30814	3.7935	4.09757	2.63712	0	1.36187	0	0.735172	3.60827	1.60193	0	1.32951	0	3.17745	2.83337	3.35195	1.67712	1.37789	0	1.67616	1.95016	2.48706
Rv3149	nuoE	679.145	726.581	660.613	2984.22	2974.84	3017.52	632.616	691.827	715.603	2777.48	2534.45	2708.87	650.139	595.618	596.933	3160.29	3037.38	2836.42	528.294	602.137	622.755	2680.18	2754.92	2710.9
Rv1267c	embR	136.649	143.522	163.518	178.927	163.903	150.975	139.653	157.976	127.454	140.418	137.836	156.989	177.311	152.893	178.743	165.227	147.335	172.961	114.044	136.411	150.667	136.607	155.363	148.395
Rv0373c	Rv0373c	400.381	390.201	412.066	154.269	150.927	140.426	337.793	329.571	292.083	127.92	156.599	162.596	519.395	470.645	478.895	157.601	155.836	130.726	427.667	440.924	490.743	146.664	168.364	135.959
Rv1982A	vapB36	4700.72	4962.73	4910.78	4384.66	4351.62	4284	5593.28	4694.35	5440.71	5233.69	5877.14	6952.39	4773.06	4515	4645.62	3533.95	3808.06	3972.73	6946.65	6542.21	5362.3	6235.32	5959.03	6148.85
Rv2689c	Rv2689c	422.245	348.714	364.972	288.306	331.22	314.476	319.889	266.926	276.151	309.507	293.713	284.343	376.114	410.817	365.916	359.687	349.922	346.592	283.434	289.356	321.422	312.604	302.925	286.012
Rv3361c	Rv3361c	94.2877	114.369	130.814	416.021	373.562	346.121	96.6828	96.6924	115.505	363.91	319.692	396.478	209.549	195.437	220.899	411.161	398.798	392.849	147.587	150.19	153.536	341.099	362.079	392.127
Rv0822c	Rv0822c	6816.05	7356.63	7340	2781.27	2971.42	2931.81	11677.1	10452.3	11210.7	2921.57	2819.5	2925.13	6338.41	6228.73	6377.4	2998.24	2933.25	3115.97	5680.42	5638.31	6138.59	2911.49	2947.34	2935.56
Rv3720	Rv3720	1540.03	1380.28	1482.13	1889.17	1851.42	1826.86	1149.45	1227.04	1145.76	1798.96	1794.03	1774.94	2154.59	2000.91	2111.19	1913.46	1906.86	1905.92	1452.39	1488.12	1333.04	1873.95	1815.6	1759.18
Rv3053c	nrdH	12854.6	12469.6	11918.5	6475.51	6400.41	6745.08	14589.5	14420.8	14539.1	6354.09	6560.55	6394.91	14181.3	12603.7	12304.6	5968.51	6093.17	6801.78	11055.6	12264.6	9644.1	6590.66	6150.15	6848.54
Rv1966	mce3A	188.575	168.19	159.594	64.4896	56.0002	42.8531	223.206	238.326	204.458	64.6951	54.8456	73.6889	98.5059	83.7588	102.861	43.2133	35.4172	54.3016	152.618	146.056	117.663	76.2653	56.5546	63.8346
Rv0746	PE_PGRS9	91.5548	127.824	120.349	84.7216	75.8051	67.9057	75.1977	70.817	49.123	97.7778	100.31	77.6937	57.3125	136.939	126.469	122.649	111.21	73.0725	112.367	104.719	274.07	79.6176	115.059	84.5602
Rv1208	gpgS	1262.64	1271.52	1342.16	1223.41	1243.61	1278.34	1514.7	1474.9	1441.83	1311.55	1323.51	1315.19	1253.71	1140.72	1131.47	1222.68	1313.98	1258.99	1445.68	1376.51	1368.91	1374.45	1281.25	1354.62
Rv2344c	dgt	1116.42	1093.24	1088.38	1201.28	1274.35	1253.29	1006.22	1014.59	1039.55	1149.07	1166.91	1137.37	893.717	925.336	905.516	1244.29	1264.39	1240.89	966.024	925.94	964.266	1153.2	1149.94	1199.59
Rv0178	Rv0178	1407.48	1531.65	1459.89	3696.14	3635.91	3591.75	1178.1	1203.89	1131.16	3667.04	3929.4	3577.12	2052.51	2063.39	2077.46	3647.07	3581.39	3528.93	1558.05	1541.86	1806.56	3765.49	3831.41	3727.28
Rv1475c	acn	1899.42	1974.55	1877.19	9258.05	9038.56	9670.96	2773.96	2682.87	2595.55	9258.02	9377.16	9579.56	2256.68	2052.76	2045.42	10177.4	9865.1	10362.9	2277.54	2259.73	1714.73	9624.51	9387.41	9577.68
Rv0910	Rv0910	1145.12	1112.3	1138.09	1482.63	1479.22	1596.11	1050.38	1109.92	1036.89	1263.76	1260.01	1344.02	1081.77	1092.85	1030.3	1446.37	1377.73	1577.43	1031.43	1040.3	819.339	1330.03	1278.65	1310.68
[truncated: 2,062 more rows]
